# Supplementary material for: Effectiveness and Safety of Apixaban versus Warfarin as Outpatient Treatment of Venous Thromboembolism in U.S. Clinical Practice
Source: PubMed Central journal article supplement — Thromb Haemost. 2018 Oct 24;118(11):1951–61. doi: 10.1055/s-0038-1673689 (PMC6206509; doi:10.1055/s-0038-1673689), 2018-10-24
Supplement: 10-1055-s-0038-1673689-s180391.pdf [file 10-1055-s-0038-1673689-s180391.pdf]

## Supplementary Material A: Study Methods

### Methods

#### Study Design

This study employed a retrospective matched-cohort design and data from four large integrated US private healthcare claims databases—the Truven Health Analytics' MarketScan Commercial Claims and Encounters and Medicare Supplemental and Coordination of Benefits Databases (the 'MarketScan Database'), the IQVIA PharMetrics Plus Database (the 'PharMetrics Database'), the Optum Clinformatics Claims Database (the 'Optum Database') and the Humana Medical, Laboratory and Pharmacy Claims Database (the 'Humana Database'). Data from the four databases were pooled for analyses to increase the power of the study to evaluate study outcomes and to improve the generalizability of study results. A schematic depicting the design of the study follows:

dures performed/services rendered and quantity of services (professional-service claims only). Data available for each outpatient pharmacy claim include the drug (class) dispensed, dispensing date, quantity dispensed and number of days supplied. Medical and pharmacy claims also include amounts paid (i.e. reimbursed) by health plans and patients for services rendered by health care providers (MarketScan, PharMetrics, Humana), or standard costs (Optum). Selected demographic and eligibility information (including age, sex, geographic region of residence, dates of plan eligibility) is available for all health plan enrollees in the databases. All data can be arrayed to provide a detailed chronology of medical and pharmacy services used by each plan member over time.

From each data extract, an analytic file comprising all patients and variables required for planned analyses was created from information contained exclusively within the source material. Each of the analytic files was patient-level,

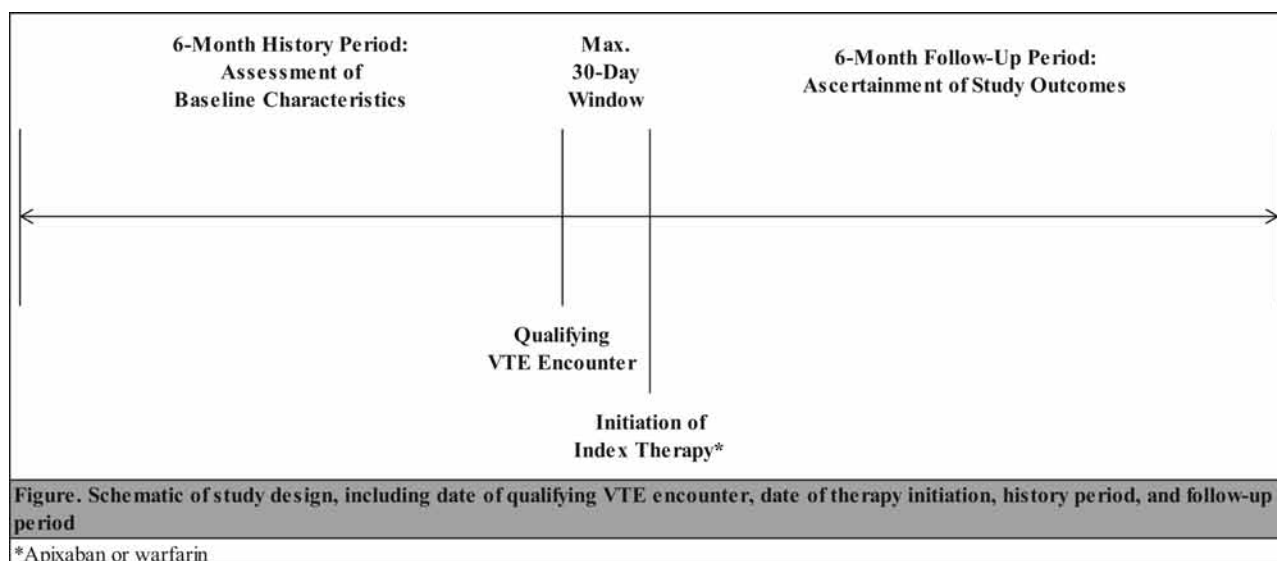

#### Data Source(s)

The four study databases each comprise medical (i.e. facility and professional service) and outpatient pharmacy claims from a large number of participating U.S. private health plans, and spanned the period from 1 March 2014 through 30 June 2017 herein. Together, these four geographically diverse databases capture health care claims information for > 45 million plan members annually, including enrollees, their spouses and their dependents. Elderly persons who have elected to enrol in an employer-sponsored commercial plan (with or without Medicare supplemental coverage) or a Medicare Advantage Plan—and thus receive their health care coverage through a private health plan—also are included in the data source population.

Data available from each facility and professional-service claim include dates and places of service, diagnoses, proce-

and included data on patient demographic and clinical characteristics, VTE encounters, anticoagulant therapy and outcomes of interest (e.g. bleeding events, bleeding-related costs); variable names were standardized across analytic files. Variables were created based on information from medical and pharmacy claims, as well as enrolment records, which were linked at the patient level via encrypted identifiers provided by the data vendors.

Once created, the four independent, identically structured analytic files were then integrated (i.e. set or stacked, but not linked in any way), with the end product being one master analytic file that was used for planned analyses. No manipulation of data fields, or linking/ appending of information to observations, was performed on the master file. Patient-level information from the four study databases was pooled in a single analytic file to increase the power to address study

objectives and to enhance the generalizability of study findings.

### Source and Study Populations

The source population included all patients aged  $\geq 18$  years who, between 1 September 2014 and 30 June 2017, had an encounter for the treatment of VTE. Evidence of VTE was ascertained based on encounters in the acute-care inpatient setting or ambulatory-care setting (e.g. emergency department, physician office) with ICD-9-CM/ICD-10-CM diagnosis codes for lower extremity DVT or PE. The earliest such encounter for each patient was designated the 'index encounter'. Outpatient encounters followed by inpatient encounters within 7 days were considered inpatient encounters, unless apixaban or warfarin was initiated between encounters, in which case they were classified as outpatient encounters.

From the source population, all patients who received outpatient treatment with apixaban or warfarin (plus PAC bridging therapy) following their index encounters, and who met all other inclusion criteria, were selected as candidates for matching and thus inclusion in the study population. Outpatient use of apixaban or warfarin from the date of the index encounter (service date, if outpatient VTE; discharge date, if inpatient VTE) through the 30-day period thereafter was ascertained based on National Drug Codes (NDCs) (**► Supplementary Material B, ► Appendix A**). The first treatment (i.e. apixaban or warfarin) received by each patient was designated as the 'index therapy'. Warfarin patients with an index VTE encounter requiring outpatient care only who did not have evidence of PAC use (i.e. bridging therapy) during the period  $\pm 14$  days from first receipt of warfarin were excluded. Among warfarin patients who had evidence of PAC use during this period, the sub-set who received it beyond the 14-day period following initiation of warfarin was also excluded. Other inclusion criteria (e.g.  $\geq 6$  months of enrolment prior to index encounter; no evidence of atrial fibrillation/flutter, prior VTE, history of bleeding, active malignancy) are set forth below.

### Inclusion Criteria

Patients who met all of the following criteria (#1–#4) were considered for matching and thus inclusion in the study population:

- (1) An acute-care inpatient encounter with a principal or secondary diagnosis of VTE, or an ambulatory-care encounter with any diagnosis of VTE from 1 September 2014 to 30 June 2017. VTE diagnosis codes were based in large part on those recommended in the FDA-sponsored mini-sentinel report on definitions previously employed in studies using administrative data sources (Tamariz 2011):
  - ICD-9 415.1x (pulmonary embolism and infarction) and ICD-10 I2692, I2699, T82817A, T82818A (pulmonary embolism and infarction), excluding:
  - ICD-9 415.12 (septic pulmonary embolism).
  - ICD-10 I2690 (septic pulmonary embolism without acute cor pulmonale).

- ICD-9 451.xx (phlebitis and thrombophlebitis) and ICD-10 I801\*, I802\*, I803, I809 (phlebitis and thrombophlebitis), excluding:
- ICD-9 451.0 (of superficial vessels of lower extremities), 451.82 (of superficial veins of upper extremities) and 451.89 (other [axillary vein, jugular vein, subclavian vein, thrombophlebitis of breast]).
- ICD-10 I800\* (of superficial vessels of unspecified lower extremity), I808 (phlebitis and thrombophlebitis of other sites).
- ICD-9 453.xx (other venous embolism and thrombosis) and ICD-10 I821, I82220, I82221, I8240\*, I8241\*, I8242\*, I8243\*, I824Y\*, I8244\*, I8249\*, I824Z\*, I8281\*, I8261\*, I8262\*, I8260\*, I82A1\*, I82B1\*, I82C1\*, I82210, I82290, I82890, I829\* (other venous embolism and thrombosis), excluding:
- ICD-9 453.0 (Budd–Chiari syndrome), 453.3 (of renal vein), 453.5 (chronic venous embolism and thrombosis of deep vessels of lower extremity) and 453.7 (chronic venous embolism and thrombosis of other specified vessels).
- ICD-10 I820 (Budd–Chiari syndrome), I823 (of renal vein), I8250\*, I8259\*, I8251\*, I8252\*, I8253\*, I825Y\*, I8254\*, I825Z\* (chronic venous embolism and thrombosis of deep vessels of lower extremity), I8271\*, I8272\*, I8270\*, I82A2\*, I82B2\*, I82C2\*, I82211, I82291, I82891 (chronic venous embolism and thrombosis of other specified vessels).

Qualifying outpatient encounters followed by qualifying inpatient encounters within 7 days were considered inpatient episodes (unless apixaban or warfarin was initiated between encounters, in which case such episodes would be classified as outpatient encounters).

- (2) An outpatient pharmacy claim for apixaban or warfarin during the 30-day period following the index encounter (i.e. date of service if outpatient, date of discharge if inpatient).
- (3) Continuous and comprehensive medical/drug coverage for  $\geq 6$  months preceding the index encounter (i.e. date of service if outpatient, date of admission if inpatient).
- (4) Age  $\geq 18$  years.

### Exclusion Criteria

Apixaban and warfarin patients who met any of the following criteria (#1–#7) were excluded from the source population:

- (1) Evidence of atrial fibrillation/flutter or chemotherapy/radiation therapy for malignancy (other than non-melanoma skin cancer) during 6-month period preceding first receipt of index therapy.
- (2) Evidence of VTE (VTE event) during 6-month period preceding index encounter.
- (3) Evidence of malignancy (other than non-melanoma skin cancer) during 90-day period preceding first receipt of index therapy.
- (4) Evidence of any OAC/parenteral anticoagulant (PAC) use during the 30-day period preceding the index encounter, or evidence of any OAC/PAC use during the 6-month

period preceding the index encounter (excluding the 30-day period immediately preceding the index encounter) unless it is determined that such therapy was administered prophylactically.<sup>a</sup>

- (5) Evidence of inferior vena cava (IVC) filter or pregnancy at any time during the study period.
- (6) Evidence of receipt of another OAC on the day of first receipt of the index therapy (or during the period between the index encounter and initiation of the index therapy).
- (7) History of major/clinically relevant non-major (CRNM) bleeding event during 6-month period preceding first receipt of index therapy.

In addition, warfarin patients with an index VTE encounter requiring outpatient care only who did not have evidence of PAC use during the period beginning 14 days before, and ending 14 days after, first receipt of warfarin were excluded from the study population. Among warfarin patients who had evidence of PAC use during this period, the sub-set who received it beyond the 14-day period following initiation of index therapy was excluded. PAC use was identified based on corresponding Healthcare Common Procedure Coding System (HCPCS) Level II Codes on medical claims and NDCs on pharmacy claims; for the latter, therapy-days supplied was used to tally duration of PAC use.

Diagnosis, procedure and drug codes that were used to identify exclusionary conditions (except for bleeding history) and pharmacotherapy are set forth in **►Supplementary Material B**, **►Appendix C** (PAC), **►Appendix D** (OAC) and **►Appendix E** (conditions/procedures). Codes that were used to define a history of major/CRNM bleeding event are set forth in Section “Endpoint(s)/Outcome(s) Assessment.”

### Matching Procedure

Apixaban patients were matched to warfarin patients based on age, care setting of index encounter (inpatient vs. ambulatory), VTE diagnosis (DVT only vs. PE [with or without DVT]), VTE aetiology (provoked vs. unprovoked) and study database (MarketScan, PharMetrics, Optum, Humana), as well as their estimated propensity score using a fixed 1:1 ratio (without replacement) and nearest-neighbour approach. Provoked VTE was defined as an event that was preceded (within 3 months) by hormone therapy, fracture/trauma involving lower extremities, pelvic/orthopaedic surgery or hospitalization for medical or surgical reasons (**►Supplementary Material B**, **►Appendix H**). Propensity scores for receipt of apixaban versus warfarin—the dependent variable—were estimated using multivariable logistic regression; independent variables included age, gender, comorbidity profile, history of fall(s), history of fracture/

trauma involving lower extremities, history of selected surgeries and outpatient pharmacotherapy.

### Definitions

#### Study Period

The study period spanned from 1 September 2014 to 30 June 2017.

#### Baseline Period

The baseline period for evaluating demographic and clinical characteristics of patients spanned the 6-month period preceding first receipt of index therapy.

#### Study Follow-Up Period

Study outcomes were assessed from the day after therapy initiation through the subsequent 6-month period, date of health plan disenrollment, date of death (in hospital), date of index therapy discontinuation,<sup>b</sup> date of switch to another OAC, date of initiation of (new) PAC treatment<sup>c</sup> or end of study database (30 June 2017), whichever occurred first.

#### Endpoint(s)/Outcomes(s) Assessment

**Major Bleeding.** A major bleeding event was defined as an acute-care inpatient admission with:

- A principal or first-listed diagnosis code for:
  - Gastrointestinal (GI) bleeding.
  - Intracranial haemorrhage (ICH).
  - Other selected types/sites of bleeding (as defined below)

OR

- A procedure code for the treatment of bleeding (as defined below).

**CRNM Bleeding.** A CRNM bleeding event was defined as:

- An acute-care inpatient admission with a secondary diagnosis code for GI bleeding or other non-critical-care types/sites of bleeding (without a principal/first-listed diagnosis code for GI/ICH/other bleeding, or a procedure code for bleeding treatment); or
- An ambulatory-care encounter with a diagnosis code for GI bleeding or other non-critical-care types/sites of bleeding.

**Recurrent VTE.** A recurrent VTE event was defined as an acute-care inpatient admission with a corresponding principal/first-listed diagnosis as set forth in Section “Inclusion Criteria.” Encounters occurring within 7 days of the qualifying VTE event (i.e. index encounter) were not considered in identifying new (i.e. recurrent) events.

<sup>a</sup> Prophylactic use of OAC/PAC was determined based on the duration of use and timing of use (e.g., relative to knee/hip replacement surgery or medical inpatient admission); the operational algorithm that was employed to differentiate between prophylactic use and therapeutic use of OAC/PAC is set forth in Appendix B.

<sup>b</sup> Discontinuation of index therapy was defined as a gap of 30 days without available drug (based on days supplied from filled prescriptions).

<sup>c</sup> Episodes of PAC treatment were differentiated based on a gap in therapy  $\geq 2$  days that occurred after initiation of index therapy + 14 days.

**Table.** Codes for identification of bleeding events

| Bleeding Category                             | ICD-9-CM Diagnosis Codes                                                                                                                                                                                                                                                                    | ICD-10-CM Diagnosis Codes                                                                                                                                                                                                                                                                                                                                                                                                                                                                                                                                                                                                                           | ICD-9-CM Procedure Codes | ICD-10-CM Procedure Codes                                                                                                                      |
|-----------------------------------------------|---------------------------------------------------------------------------------------------------------------------------------------------------------------------------------------------------------------------------------------------------------------------------------------------|-----------------------------------------------------------------------------------------------------------------------------------------------------------------------------------------------------------------------------------------------------------------------------------------------------------------------------------------------------------------------------------------------------------------------------------------------------------------------------------------------------------------------------------------------------------------------------------------------------------------------------------------------------|--------------------------|------------------------------------------------------------------------------------------------------------------------------------------------|
| <b>Major Bleeding</b>                         |                                                                                                                                                                                                                                                                                             |                                                                                                                                                                                                                                                                                                                                                                                                                                                                                                                                                                                                                                                     |                          |                                                                                                                                                |
| Gastrointestinal (GI)                         | 456.0, 456.20, 530.82, 531.0x, 531.2x, 531.4x, 531.6x, 531.8x, 532.0x, 532.2x, 532.4x, 532.6x, 533.0x, 533.2x, 533.4x, 533.6x, 534.0x, 534.2x, 534.4x, 534.6x, 535.01, 535.11, 535.21, 535.31, 535.41, 535.51, 535.61, 537.83, 562.02, 562.03, 562.12, 562.13, 568.81, 569.3, 569.85, 578.x | K250, K252, K254, K256, K260, K262, K264, K266, K270, K272, K274, K276, K280, K282, K284, K286, K661, K625, K920, K921, K922, I8501, I8511, K2901, K2931, K2941, K2951, K2961, K2921, K2971, K2991, K2981, K5711, K5713, K5731, K5791, K5733, K5793, K5521, K31811                                                                                                                                                                                                                                                                                                                                                                                  | 44.43                    | 0W3PRZZ                                                                                                                                        |
| Intracranial (ICH)                            | 430.xx, 431.xx, 432.0x, 432.1x, 432.9x, 852.0x, 852.2x, 852.4x, 853.0x                                                                                                                                                                                                                      | I602, I604, I606, I607, I608, I609, I61*, I621, I629, I600*, I601*, I603*, I605*, I620*, S066X0A, S066X1A, S066X2A, S066X3A, S066X4A, S066X5A, S066X6A, S066X7A, S066X8A, S066X9A, S066X0A, S065X1A, S065X2A, S065X3A, S065X4A, S065X5A, S065X6A, S065X7A, S065X8A, S065X9A, S064X0A, S064X1A, S064X2A, S064X3A, S064X4A, S064X5A, S064X6A, S064X7A, S064X8A, S064X9A, S06360A, S06360A, S06350A, S06341A, S06342A, S06351A, S06352A, S06361A, S06362A, S06343A, S06344A, S06353A, S06354A, S06363A, S06364A, S06345A, S06355A, S06365A, S06346A, S06347A, S06348A, S06356A, S06357A, S06358A, S06366A, S06367A, S06368A, S06349A, S06359A, S06369A | ---                      | ---                                                                                                                                            |
| Other                                         | 285.1, 360.43, 362.43, 362.81, 363.61, 363.62, 363.72, 364.41, 372.72, 374.81, 376.32, 377.42, 379.23, 423.0, 596.7x, 599.7x, 602.1x, 620.1, 621.4, 626.2, 626.5, 626.7, 626.8, 626.9, 719.1x, 782.7, 784.7, 784.8, 786.3x, 958.2, 997.02, 998.11                                           | D62, I312, R31*, N421, N831, N857, N920, N923, N930, N897, N925, N938, N926, N939, R233, R04*, H356*, H210*, H113*, H0289, H431*, M2500, M2508, G973*, D780*, D782*, E360*, G975*, H952*, H954*, I9742, I9762, J956*, K916*, L760*, L762*, N996*, H4481*, H3573*, H3130*, H3131*, H3141*, H0523*, H4702*, M2501*, M2502*, M2503*, M2504*, M2505*, M2506*, M2507*, I9781*, I9782*, H591*, H5931*, H5932*, I9741*, I9761*, J9583*, K9184*, M9681*, M9683*, N9982*, T792XXA                                                                                                                                                                            | 99.04*                   | 30230N1, 30230P1, 30233N1, 30233P1, 30240N1, 30240P1, 30243N1, 30243P1, 30250N1, 30250P1, 30253N1, 30253P1, 30260N1, 30260P1, 30263N1, 30263P1 |
| <b>Clinically Relevant Non-Major Bleeding</b> |                                                                                                                                                                                                                                                                                             |                                                                                                                                                                                                                                                                                                                                                                                                                                                                                                                                                                                                                                                     |                          |                                                                                                                                                |
| Gastrointestinal (GI)                         | 456.0, 456.20, 530.82, 531.0x, 531.2x, 531.4x, 531.6x, 532.0x, 532.2x, 532.4x, 532.6x, 533.0x, 533.2x, 533.4x, 533.6x, 534.0x, 534.2x, 534.4x, 534.6x, 535.01, 535.11, 535.21, 535.31, 535.41, 535.51, 535.61, 537.83, 562.02, 562.03, 562.12, 562.13, 569.3, 569.85, 578.x                 | K250, K252, K254, K256, K260, K262, K264, K266, K270, K272, K274, K276, K280, K282, K284, K286, K625, K920, K921, K922, I8501, I8511, K2901, K2931, K2941, K2951, K2961, K2921, K2971, K2991, K2981, K5711, K5713, K5731, K5791, K5733, K5793, K5521, K31811                                                                                                                                                                                                                                                                                                                                                                                        | ---                      | ---                                                                                                                                            |
| Intracranial (ICH)                            | ---                                                                                                                                                                                                                                                                                         | ---                                                                                                                                                                                                                                                                                                                                                                                                                                                                                                                                                                                                                                                 | ---                      | ---                                                                                                                                            |
| Other                                         | 372.72, 374.81, 596.7x, 599.7x, 602.1x, 620.1, 621.4, 626.2, 626.5, 626.7, 626.8, 626.9, 782.7, 784.7, 784.8, 786.3x, 958.2                                                                                                                                                                 | R31*, N421, N831, N857, N920, N923, N930, N897, N925, N938, N926, N939, R233, R04*, H113*, H0289, H952*, H954*, J956*, K916*, L760*, L762*, I9781*, I9782*, J9583*, K9184*, T792XXA                                                                                                                                                                                                                                                                                                                                                                                                                                                                 | ---                      | ---                                                                                                                                            |

\*Hospitalizations with ICD-9-CM procedure code 99.04 and corresponding ICD-10-CM procedure codes will be classified as other bleeding events only in the absence of codes for GI or ICH bleeding events

**Other Study Variables**

Independent variables used in the estimation of propensity scores included demographic and clinical characteristics of patients that are believed to be associated with the study outcomes and/or choice of index therapy. It was anticipated that demographic characteristics would be available for nearly all study subjects. All other characteristics were defined based on the presence of specific data (e.g. diagnosis codes, procedure codes); the absence of such data was assumed to indicate the absence of the characteristic captured by the variable. All such characteristics were ascertained based on information available during the 6-month period preceding first receipt of index therapy.

Patient and treatment characteristics included: age; gender; geographic region of residence; type of insurance coverage; specialty of physician prescriber (if available); comorbidity profile (e.g. Deyo–Charlson Comorbidity Index [**►Supplementary Material B, ►Appendix F**]), and coagulopathy, ischaemic heart disease, peripheral vascular disease, heart failure, stroke or transient ischaemic attack [TIA], chronic obstructive pulmonary disease [COPD], liver disease, renal disease, thrombocytopenia, diabetes, anaemia, ulcer disease, dyspepsia, hypertension, thrombophilia, inflammatory bowel disease); recent history of falls, fracture/trauma involving the lower extremities, selected surgeries; and outpatient pharmacotherapy (e.g. recent history of statins, anti-platelet therapy, non-steroidal anti-inflammatory drug [NSAID], hormone therapy) (**►Supplementary Material B, ►Appendix G**).

Other characteristics that were examined during follow-up include dose of index therapy (i.e. with first and subsequent prescriptions), switching from index therapy to another oral anticoagulant, amount of index therapy received (i.e. days supplied), use of PAC (between index

encounter and initiation of index therapy, and subsequently) and duration of follow-up. These variables were not considered in the estimation of propensity scores.

**Data Analysis**

**Base Case Analysis**

The adequacy of the matching procedure in terms of patients' baseline characteristics was evaluated using standardized differences; a value < 0.1 was assumed to indicate a negligible difference in the characteristic between apixaban patients and warfarin patients (Austin 2011, Norman 2001).

Major bleeding, CRNM bleeding and recurrent VTE were compared between patients who received apixaban versus warfarin using shared frailty models (an extension of the Cox proportional hazards model that adjusts for correlation from matching). Kaplan–Meier curves were generated to depict the cumulative incidence of major bleeding, CRNM bleeding and recurrent VTE, respectively, and statistical comparisons were based on the stratified log-rank test (Klein 1997). The proportional hazards assumption was evaluated using published methods (Allison 2010, Pencina 2008). All analyses were performed in SAS 9.4 (SAS Institute, Cary, North Carolina, United States).

**Sub-Group and Sensitivity Analyses**

**Sub-Group Analyses.** Analyses of study measures, as described above, were repeated focusing alternatively on each data source—MarketScan Database, PharMetrics Database, Optum Database and Humana Database, respectively. **Sensitivity Analyses.** Use of a cohort design (i.e. without matching) was also employed. In these analyses, all patients who received outpatient treatment with apixaban or

warfarin (plus PAC bridging therapy) following their index encounters, and who met all other inclusion criteria were included in the study population. Bleeding events and recurrent VTE events were compared between patients who received apixaban versus warfarin using a shared frailty model (an extension of the Cox proportional hazards model that adjusts for intra-cluster [i.e. intra-database] correlation), with adjustment of estimated hazard ratios for systematic differences between treatment groups in baseline demographic and clinical characteristics. Patient characteristics were selected for inclusion in the multivariate model using a stepwise selection method (variable entry/retention criterion,  $p$ -value < 0.10).

In addition, an alternative approach to model specification using inverse proportional treatment weighting (IPTW) was employed to examine the impact of average treatment effect. The probability of receiving apixaban at study baseline was regressed on baseline covariates including VTE diagnosis, VTE care setting and VTE aetiology, as well as demographic and comorbidity profiles. Predicted probabilities were then inverted for apixaban patients and 1 minus predicted probabilities were inverted for warfarin patients. These inverses were then normalized to account for unequal sample sizes between treatment arms and were used as weights in evaluations of study outcomes using Cox proportional hazards models.

#### Power/Sample Size

Estimation of statistical power was based on the following assumptions, which were in turn based on exploratory analyses of data from earlier releases of the MarketScan and PharMetrics Databases (including data through 30 September 2015) and findings from the AMPLIFY clinical trial (Agnelli 2013):

- There would be at least 8,000 patients who received apixaban as outpatient treatment for VTE and met all other study entry criteria;
- The matched number of patients who received warfarin as outpatient treatment for VTE and met all other study entry criteria would total 8,000;
- Patients who received warfarin as outpatient treatment of VTE would have a 1.9% risk of a major bleeding event during the 6-month follow-up period; and

- Patients who received apixaban as outpatient treatment of VTE would have a 0.8% risk of a major bleeding event during the 6-month follow-up period.

Based on these assumptions and using a test to detect a difference between two proportions (Fleiss 1981), we calculated that  $\beta$  for this evaluation would <20% (two-sided  $\alpha = 0.05$ ), and that the study would have >80% power to detect the assumed difference in risk of major bleeding events between patients who received apixaban versus those who received warfarin.

#### Bibliography

- 1 Agnelli G, Buller HR, Cohen A, et al; AMPLIFY Investigators. Oral apixaban for the treatment of acute venous thromboembolism. *N Engl J Med* 2013;369(09):799–808
- 2 Allison PD. *Survival Analysis Using SAS: A Practical Guide*. 2nd ed. North Carolina: SAS Institute Inc; 2010
- 3 Austin PC. An introduction to propensity score methods for reducing the effects of confounding in observational studies. *Multivariate Behav Res* 2011;46(03):399–424
- 4 Edelsberg J, Hagiwara M, Taneja C, Oster G. Risk of venous thromboembolism among hospitalized medically ill patients. *Am J Health Syst Pharm* 2006;63(20, Suppl 6):S16–S22
- 5 Fleiss, *Statistical Methods for Rates and Proportions*. 2nd ed. New York: John Wiley & Sons; 1981
- 6 Kearon C, Akl EA, Ornelas J, et al. Antithrombotic therapy for VTE disease: CHEST guidelines and expert panel report. *Chest* 2016; 149(02):315–352
- 7 Klein JP, Moeschberger ML *Survival Analysis: Techniques for Censored and Truncated Data*. New York: Springer-Verlag; 1997
- 8 Normand ST, Landrum MB, Guadagnoli E, et al. Validating recommendations for coronary angiography following acute myocardial infarction in the elderly: a matched analysis using propensity scores. *J Clin Epidemiol* 2001;54(04):387–398
- 9 Oster G, Ollendorf DA, Vera-Llonch M, Hagiwara M, Berger A, Edelsberg J. Economic consequences of venous thromboembolism following major orthopedic surgery. *Ann Pharmacother* 2004;38(03):377–382
- 10 Pencina MJ, D'Agostino RB Sr, D'Agostino RB Jr, Vasan RS. Evaluating the added predictive ability of a new marker: from area under the ROC curve to reclassification and beyond. *Statist Med* 2008;27(02):157–172
- 11 U.S. Food and Drug Administration (FDA). Mini-sentinel systematic evaluation of health outcome of interest definitions for studies using administrative data: Venous thromboembolism report. Department of Health and Human Services; 2011. Contact number HHSF2232009100061

## Supplementary Material B

## Appendix A

**Table.** NDC codes for apixaban and warfarin sodium (partial list for warfarin)

| Brand Name    | Generic Name    | NDC Code      | Form | Strength | Route |
|---------------|-----------------|---------------|------|----------|-------|
| Eliquis       | Apixaban        | 54569-6513-00 | TAB  | 2.5 mg   | ORAL  |
|               |                 | 54569-6514-00 | TAB  | 5 mg     | ORAL  |
|               |                 | 00003-0894-21 | TAB  | 5 mg     | ORAL  |
|               |                 | 00003-0893-21 | TAB  | 2.5 mg   | ORAL  |
|               |                 | 00003-0894-31 | TAB  | 5 mg     | ORAL  |
|               |                 | 00003-0893-31 | TAB  | 2.5 mg   | ORAL  |
| Coumadin      | Warfarin sodium | 00056-0173-01 | TAB  | 7.5 mg   | ORAL  |
|               |                 | 00056-0188-01 | TAB  | 3 mg     | ORAL  |
|               |                 | 00056-0173-70 | TAB  | 7.5 mg   | ORAL  |
|               |                 | 00056-0174-01 | TAB  | 10 mg    | ORAL  |
|               |                 | 00056-0174-70 | TAB  | 10 mg    | ORAL  |
|               |                 | 00056-0174-75 | TAB  | 10 mg    | ORAL  |
|               |                 | 00056-0172-01 | TAB  | 5 mg     | ORAL  |
|               |                 | 00056-0172-90 | TAB  | 5 mg     | ORAL  |
|               |                 | 00056-0172-75 | TAB  | 5 mg     | ORAL  |
|               |                 | 00056-0172-70 | TAB  | 5 mg     | ORAL  |
|               |                 | 00056-0170-01 | TAB  | 2 mg     | ORAL  |
|               |                 | 00056-0170-70 | TAB  | 2 mg     | ORAL  |
|               |                 | 00056-0170-75 | TAB  | 2 mg     | ORAL  |
|               |                 | 00056-0170-90 | TAB  | 2 mg     | ORAL  |
|               |                 | 00056-0169-01 | TAB  | 1 mg     | ORAL  |
|               |                 | 00056-0169-75 | TAB  | 1 mg     | ORAL  |
|               |                 | 00056-0169-70 | TAB  | 1 mg     | ORAL  |
|               |                 | 00056-0169-90 | TAB  | 1 mg     | ORAL  |
|               |                 | 00056-0176-01 | TAB  | 2.5 mg   | ORAL  |
|               |                 | 00056-0176-75 | TAB  | 2.5 mg   | ORAL  |
|               |                 | 00056-0176-90 | TAB  | 2.5 mg   | ORAL  |
|               |                 | 00056-0176-70 | TAB  | 2.5 mg   | ORAL  |
|               |                 | 00056-0168-70 | TAB  | 4 mg     | ORAL  |
|               |                 | 00056-0168-75 | TAB  | 4 mg     | ORAL  |
|               |                 | 00056-0168-01 | TAB  | 4 mg     | ORAL  |
|               |                 | 00056-0189-70 | TAB  | 6 mg     | ORAL  |
|               |                 | 00056-0189-75 | TAB  | 6 mg     | ORAL  |
|               |                 | 00056-0189-01 | TAB  | 6 mg     | ORAL  |
|               |                 | 00056-0188-70 | TAB  | 3 mg     | ORAL  |
| 00056-0188-75 | TAB             | 3 mg          | ORAL |          |       |
| 00056-0173-75 | TAB             | 7.5 mg        | ORAL |          |       |
| Jantoven      | Warfarin sodium | 00832-1216-89 | TAB  | 5 mg     | ORAL  |
|               |                 | 00832-1211-00 | TAB  | 1 mg     | ORAL  |
|               |                 | 00832-1216-00 | TAB  | 5 mg     | ORAL  |
|               |                 | 00832-1216-10 | TAB  | 5 mg     | ORAL  |
|               |                 | 00832-1218-89 | TAB  | 7.5 mg   | ORAL  |
|               |                 | 00832-1218-01 | TAB  | 7.5 mg   | ORAL  |
|               |                 | 00832-1218-50 | TAB  | 7.5 mg   | ORAL  |
|               |                 | 00832-1218-00 | TAB  | 7.5 mg   | ORAL  |
|               |                 | 00832-1215-89 | TAB  | 4 mg     | ORAL  |
|               |                 | 00832-1215-01 | TAB  | 4 mg     | ORAL  |
|               |                 | 00832-1215-00 | TAB  | 4 mg     | ORAL  |
|               |                 | 00832-1215-10 | TAB  | 4 mg     | ORAL  |
|               |                 | 00832-1217-89 | TAB  | 6 mg     | ORAL  |
|               |                 | 00832-1217-01 | TAB  | 6 mg     | ORAL  |
|               |                 | 00832-1217-00 | TAB  | 6 mg     | ORAL  |
|               |                 | 00832-1217-10 | TAB  | 6 mg     | ORAL  |
|               |                 | 00832-1214-89 | TAB  | 3 mg     | ORAL  |
|               |                 | 00832-1214-01 | TAB  | 3 mg     | ORAL  |
|               |                 | 00832-1214-10 | TAB  | 3 mg     | ORAL  |

## Appendix B<sup>d</sup>

Operational algorithm for differentiating between prophylactic versus therapeutic use of OAC/PAC agents:

**Step 1:** Identifying anticoagulation treatment episodes based on OAC and PAC use during the period of interest; an episode was assumed to be terminated when a gap  $\geq 30$  days occurred.

**Step 2:** Each identified anticoagulation treatment episode was determined as prophylactic use if:

(1) Duration of episode was  $\leq 42$  days; and

(2) Initiation date of anticoagulation in the episode occurred within 2 days before or 7 days after knee/hip replacement surgery; or

Initiation date of anticoagulation in the episode occurred within 7 days after the admission date of a hospitalization associated with a 'medically ill' primary diagnosis (see below for corresponding codes) and with LOS  $\geq 3$  days.

**Step 3:** A patient will be excluded from the study if any of his/her 6-month pre-index anticoagulation treatment episodes is determined as non-prophylactic use.

| Preliminary list of ICD-9-CM Codes used to define and identify "medically ill" patients |          |                                                                                |          |
|-----------------------------------------------------------------------------------------|----------|--------------------------------------------------------------------------------|----------|
| General Category                                                                        | ICD-9-CM | General Category                                                               | ICD-9-CM |
| Infectious diseases                                                                     | 001      | Infectious diseases                                                            | 117      |
| Infectious diseases                                                                     | 002      | Infectious diseases                                                            | 118      |
| Infectious diseases                                                                     | 003      | Infectious diseases                                                            | 120      |
| Infectious diseases                                                                     | 004      | Infectious diseases                                                            | 121      |
| Infectious diseases                                                                     | 005      | Infectious diseases                                                            | 122      |
| Infectious diseases                                                                     | 006      | Infectious diseases                                                            | 123      |
| Infectious diseases                                                                     | 007      | Infectious diseases                                                            | 124      |
| Infectious diseases                                                                     | 008      | Infectious diseases                                                            | 125      |
| Infectious diseases                                                                     | 009      | Infectious diseases                                                            | 126      |
| Infectious diseases                                                                     | 010      | Infectious diseases                                                            | 127      |
| Infectious diseases                                                                     | 011      | Infectious diseases                                                            | 128      |
| Infectious diseases                                                                     | 011.5    | Infectious diseases                                                            | 129      |
| Infectious diseases                                                                     | 012      | Infectious diseases                                                            | 130      |
| Infectious diseases                                                                     | 013      | Infectious diseases                                                            | 131      |
| Infectious diseases                                                                     | 014      | Infectious diseases                                                            | 132      |
| Infectious diseases                                                                     | 015      | Infectious diseases                                                            | 133      |
| Infectious diseases                                                                     | 016      | Infectious diseases                                                            | 134      |
| Infectious diseases                                                                     | 017      | Infectious diseases                                                            | 135      |
| Infectious diseases                                                                     | 018      | Infectious diseases                                                            | 136      |
| Infectious diseases                                                                     | 020      | Infectious diseases                                                            | 137      |
| Infectious diseases                                                                     | 021      | Infectious diseases                                                            | 138      |
| Infectious diseases                                                                     | 022      | Infectious diseases                                                            | 139      |
| Infectious diseases                                                                     | 023      | Cancer                                                                         | 140      |
| Infectious diseases                                                                     | 024      | Cancer                                                                         | 141      |
| Infectious diseases                                                                     | 025      | Cancer                                                                         | 142      |
| Infectious diseases                                                                     | 026      | Cancer                                                                         | 143      |
| Infectious diseases                                                                     | 027      | Cancer                                                                         | 144      |
| Infectious diseases                                                                     | 030      | Cancer                                                                         | 145      |
| Infectious diseases                                                                     | 031      | Cancer                                                                         | 146      |
| Infectious diseases                                                                     | 032      | Cancer                                                                         | 147      |
| Infectious diseases                                                                     | 033      | Cancer                                                                         | 148      |
| Infectious diseases                                                                     | 034      | Cancer                                                                         | 149      |
| Infectious diseases                                                                     | 035      | Cancer                                                                         | 150      |
| Infectious diseases                                                                     | 036      | Cancer                                                                         | 151      |
| Infectious diseases                                                                     | 037      | Cancer                                                                         | 152      |
| Sepsis                                                                                  | 038      | Cancer                                                                         | 153      |
| Infectious diseases                                                                     | 039      | Cancer                                                                         | 154      |
| Infectious diseases                                                                     | 040      | Cancer                                                                         | 155      |
| Infectious diseases                                                                     | 041      | Cancer                                                                         | 156      |
| Infectious diseases                                                                     | 042      | Cancer                                                                         | 157      |
| Infectious diseases                                                                     | 045      | Cancer                                                                         | 158      |
| Infectious diseases                                                                     | 046      | Cancer                                                                         | 159      |
| Infectious diseases                                                                     | 047      | Cancer                                                                         | 160      |
| Infectious diseases                                                                     | 048      | Cancer                                                                         | 161      |
| Infectious diseases                                                                     | 049      | Cancer                                                                         | 162      |
| Infectious diseases                                                                     | 050      | Cancer                                                                         | 163      |
| Infectious diseases                                                                     | 051      | Cancer                                                                         | 164      |
| Infectious diseases                                                                     | 052      | Cancer                                                                         | 165      |
| Infectious diseases                                                                     | 053      | Cancer                                                                         | 170      |
| Infectious diseases                                                                     | 054      | Cancer                                                                         | 171      |
| Infectious diseases                                                                     | 055      | Cancer                                                                         | 172      |
| Infectious diseases                                                                     | 056      | Cancer                                                                         | 174      |
| Infectious diseases                                                                     | 057      | Cancer                                                                         | 175      |
| Infectious diseases                                                                     | 058      | Cancer                                                                         | 176      |
| Infectious diseases                                                                     | 059      | Cancer                                                                         | 179      |
| Infectious diseases                                                                     | 060      | Cancer                                                                         | 180      |
| Infectious diseases                                                                     | 061      | Cancer                                                                         | 181      |
| Infectious diseases                                                                     | 062      | Cancer                                                                         | 182      |
| Infectious diseases                                                                     | 063      | Cancer                                                                         | 183      |
| Infectious diseases                                                                     | 064      | Cancer                                                                         | 184      |
| Infectious diseases                                                                     | 065      | Cancer                                                                         | 185      |
| Infectious diseases                                                                     | 066      | Cancer                                                                         | 186      |
| Infectious diseases                                                                     | 070      | Cancer                                                                         | 187      |
| Infectious diseases                                                                     | 071      | Cancer                                                                         | 188      |
| Infectious diseases                                                                     | 072      | Cancer                                                                         | 189      |
| Infectious diseases                                                                     | 073      | Cancer                                                                         | 190      |
| Infectious diseases                                                                     | 074      | Cancer                                                                         | 191      |
| Infectious diseases                                                                     | 075      | Cancer                                                                         | 192      |
| Infectious diseases                                                                     | 076      | Cancer                                                                         | 193      |
| Infectious diseases                                                                     | 077      | Cancer                                                                         | 194      |
| Infectious diseases                                                                     | 078      | Cancer                                                                         | 195      |
| Infectious diseases                                                                     | 079      | Cancer                                                                         | 196      |
| Infectious diseases                                                                     | 080      | Cancer                                                                         | 197      |
| Infectious diseases                                                                     | 081      | Cancer                                                                         | 198      |
| Infectious diseases                                                                     | 082      | Cancer                                                                         | 199      |
| Infectious diseases                                                                     | 083      | Cancer                                                                         | 200      |
| Infectious diseases                                                                     | 084      | Cancer                                                                         | 201      |
| Infectious diseases                                                                     | 085      | Cancer                                                                         | 202      |
| Infectious diseases                                                                     | 086      | Cancer                                                                         | 203      |
| Infectious diseases                                                                     | 087      | Cancer                                                                         | 204      |
| Infectious diseases                                                                     | 088      | Cancer                                                                         | 205      |
| Infectious diseases                                                                     | 090      | Cancer                                                                         | 206      |
| Infectious diseases                                                                     | 091      | Cancer                                                                         | 207      |
| Infectious diseases                                                                     | 092      | Cancer                                                                         | 208      |
| Infectious diseases                                                                     | 093      | Cancer                                                                         | 209      |
| Infectious diseases                                                                     | 094      | Neurologic disorders                                                           | 342      |
| Infectious diseases                                                                     | 095      | Neurologic disorders                                                           | 342.1    |
| Infectious diseases                                                                     | 096      | Neurologic disorders                                                           | 342.8    |
| Infectious diseases                                                                     | 097      | Neurologic disorders                                                           | 342.9    |
| Infectious diseases                                                                     | 098      | Neurologic disorders                                                           | 344      |
| Infectious diseases                                                                     | 099      | Neurologic disorders                                                           | 344.1    |
| Infectious diseases                                                                     | 100      | Neurologic disorders                                                           | 344.3    |
| Infectious diseases                                                                     | 101      | Neurologic disorders                                                           | 344.6    |
| Infectious diseases                                                                     | 102      | Neurologic disorders                                                           | 344.8    |
| Infectious diseases                                                                     | 103      | Neurologic disorders                                                           | 344.9    |
| Infectious diseases                                                                     | 104      | Cardiovascular conditions                                                      | 428      |
| Infectious diseases                                                                     | 110      | Cardiovascular conditions                                                      | 433      |
| Infectious diseases                                                                     | 111      | Cardiovascular conditions                                                      | 434      |
| Infectious diseases                                                                     | 112      | Neurologic disorders                                                           | 438.2    |
| Infectious diseases                                                                     | 114      | Neurologic disorders                                                           | 438.4    |
| Infectious diseases                                                                     | 115      | Neurologic disorders                                                           | 438.5    |
| Infectious diseases                                                                     | 116      | Neurologic disorders                                                           | 438.5    |
| Infectious diseases                                                                     |          | Infectious diseases                                                            | 117      |
| Infectious diseases                                                                     |          | Infectious diseases                                                            | 118      |
| Infectious diseases                                                                     |          | Infectious diseases                                                            | 120      |
| Infectious diseases                                                                     |          | Infectious diseases                                                            | 121      |
| Infectious diseases                                                                     |          | Infectious diseases                                                            | 122      |
| Infectious diseases                                                                     |          | Infectious diseases                                                            | 123      |
| Infectious diseases                                                                     |          | Infectious diseases                                                            | 124      |
| Infectious diseases                                                                     |          | Infectious diseases                                                            | 125      |
| Infectious diseases                                                                     |          | Infectious diseases                                                            | 126      |
| Infectious diseases                                                                     |          | Infectious diseases                                                            | 127      |
| Infectious diseases                                                                     |          | Infectious diseases                                                            | 128      |
| Infectious diseases                                                                     |          | Infectious diseases                                                            | 129      |
| Infectious diseases                                                                     |          | Infectious diseases                                                            | 130      |
| Infectious diseases                                                                     |          | Infectious diseases                                                            | 131      |
| Infectious diseases                                                                     |          | Infectious diseases                                                            | 132      |
| Infectious diseases                                                                     |          | Infectious diseases                                                            | 133      |
| Infectious diseases                                                                     |          | Infectious diseases                                                            | 134      |
| Infectious diseases                                                                     |          | Infectious diseases                                                            | 135      |
| Infectious diseases                                                                     |          | Infectious diseases                                                            | 136      |
| Infectious diseases                                                                     |          | Infectious diseases                                                            | 137      |
| Infectious diseases                                                                     |          | Infectious diseases                                                            | 138      |
| Infectious diseases                                                                     |          | Infectious diseases                                                            | 139      |
| Infectious diseases                                                                     |          | Cancer                                                                         | 140      |
| Infectious diseases                                                                     |          | Cancer                                                                         | 141      |
| Infectious diseases                                                                     |          | Cancer                                                                         | 142      |
| Infectious diseases                                                                     |          | Cancer                                                                         | 143      |
| Infectious diseases                                                                     |          | Cancer                                                                         | 144      |
| Infectious diseases                                                                     |          | Cancer                                                                         | 145      |
| Infectious diseases                                                                     |          | Cancer                                                                         | 146      |
| Infectious diseases                                                                     |          | Cancer                                                                         | 147      |
| Infectious diseases                                                                     |          | Cancer                                                                         | 148      |
| Infectious diseases                                                                     |          | Cancer                                                                         | 149      |
| Infectious diseases                                                                     |          | Cancer                                                                         | 150      |
| Infectious diseases                                                                     |          | Cancer                                                                         | 151      |
| Infectious diseases                                                                     |          | Cancer                                                                         | 152      |
| Infectious diseases                                                                     |          | Cancer                                                                         | 153      |
| Infectious diseases                                                                     |          | Cancer                                                                         | 154      |
| Infectious diseases                                                                     |          | Cancer                                                                         | 155      |
| Infectious diseases                                                                     |          | Cancer                                                                         | 156      |
| Infectious diseases                                                                     |          | Cancer                                                                         | 157      |
| Infectious diseases                                                                     |          | Cancer                                                                         | 158      |
| Infectious diseases                                                                     |          | Cancer                                                                         | 159      |
| Infectious diseases                                                                     |          | Cancer                                                                         | 160      |
| Infectious diseases                                                                     |          | Cancer                                                                         | 161      |
| Infectious diseases                                                                     |          | Cancer                                                                         | 162      |
| Infectious diseases                                                                     |          | Cancer                                                                         | 163      |
| Infectious diseases                                                                     |          | Cancer                                                                         | 164      |
| Infectious diseases                                                                     |          | Cancer                                                                         | 165      |
| Infectious diseases                                                                     |          | Cancer                                                                         | 170      |
| Infectious diseases                                                                     |          | Cancer                                                                         | 171      |
| Infectious diseases                                                                     |          | Cancer                                                                         | 172      |
| Infectious diseases                                                                     |          | Cancer                                                                         | 174      |
| Infectious diseases                                                                     |          | Cancer                                                                         | 175      |
| Infectious diseases                                                                     |          | Cancer                                                                         | 176      |
| Infectious diseases                                                                     |          | Cancer                                                                         | 179      |
| Infectious diseases                                                                     |          | Cancer                                                                         | 180      |
| Infectious diseases                                                                     |          | Cancer                                                                         | 181      |
| Infectious diseases                                                                     |          | Cancer                                                                         | 182      |
| Infectious diseases                                                                     |          | Cancer                                                                         | 183      |
| Infectious diseases                                                                     |          | Cancer                                                                         | 184      |
| Infectious diseases                                                                     |          | Cancer                                                                         | 185      |
| Infectious diseases                                                                     |          | Cancer                                                                         | 186      |
| Infectious diseases                                                                     |          | Cancer                                                                         | 187      |
| Infectious diseases                                                                     |          | Cancer                                                                         | 188      |
| Infectious diseases                                                                     |          | Cancer                                                                         | 189      |
| Infectious diseases                                                                     |          | Cancer                                                                         | 190      |
| Infectious diseases                                                                     |          | Cancer                                                                         | 191      |
| Infectious diseases                                                                     |          | Cancer                                                                         | 192      |
| Infectious diseases                                                                     |          | Cancer                                                                         | 193      |
| Infectious diseases                                                                     |          | Cancer                                                                         | 194      |
| Infectious diseases                                                                     |          | Cancer                                                                         | 195      |
| Infectious diseases                                                                     |          | Cancer                                                                         | 196      |
| Infectious diseases                                                                     |          | Cancer                                                                         | 197      |
| Infectious diseases                                                                     |          | Cancer                                                                         | 198      |
| Infectious diseases                                                                     |          | Cancer                                                                         | 199      |
| Infectious diseases                                                                     |          | Cancer                                                                         | 200      |
| Infectious diseases                                                                     |          | Cancer                                                                         | 201      |
| Infectious diseases                                                                     |          | Cancer                                                                         | 202      |
| Infectious diseases                                                                     |          | Cancer                                                                         | 203      |
| Infectious diseases                                                                     |          | Cancer                                                                         | 204      |
| Infectious diseases                                                                     |          | Cancer                                                                         | 205      |
| Infectious diseases                                                                     |          | Cancer                                                                         | 206      |
| Infectious diseases                                                                     |          | Cancer                                                                         | 207      |
| Infectious diseases                                                                     |          | Cancer                                                                         | 208      |
| Infectious diseases                                                                     |          | Cancer                                                                         | 209      |
| Infectious diseases                                                                     |          | Neurologic disorders                                                           | 342      |
| Infectious diseases                                                                     |          | Neurologic disorders                                                           | 342.1    |
| Infectious diseases                                                                     |          | Neurologic disorders                                                           | 342.8    |
| Infectious diseases                                                                     |          | Neurologic disorders                                                           | 342.9    |
| Infectious diseases                                                                     |          | Neurologic disorders                                                           | 344      |
| Infectious diseases                                                                     |          | Neurologic disorders                                                           | 344.1    |
| Infectious diseases                                                                     |          | Neurologic disorders                                                           | 344.3    |
| Infectious diseases                                                                     |          | Neurologic disorders                                                           | 344.6    |
| Infectious diseases                                                                     |          | Neurologic disorders                                                           | 344.8    |
| Infectious diseases                                                                     |          | Neurologic disorders                                                           | 344.9    |
| Infectious diseases                                                                     |          | Cardiovascular conditions                                                      | 428      |
| Infectious diseases                                                                     |          | Cardiovascular conditions                                                      | 433      |
| Infectious diseases                                                                     |          | Cardiovascular conditions                                                      | 434      |
| Infectious diseases                                                                     |          | Neurologic disorders                                                           | 438.2    |
| Infectious diseases                                                                     |          | Neurologic disorders                                                           | 438.4    |
| Infectious diseases                                                                     |          | Neurologic disorders                                                           | 438.5    |
| Infectious diseases                                                                     |          | Neurologic disorders                                                           | 438.5    |
| Infectious diseases                                                                     |          | Other sepsis                                                                   | 038      |
| Infectious diseases                                                                     |          | Actinomycotic infections                                                       | 039      |
| Infectious diseases                                                                     |          | Other bacterial infections                                                     | 040      |
| Infectious diseases                                                                     |          | Bacterial infection in conditions classified elsewhere and of unspecified site | 041      |
| Infectious diseases                                                                     |          | HIV                                                                            | 042      |
| Infectious diseases                                                                     |          | Acute poliomyelitis                                                            | 045      |
| Infectious diseases                                                                     |          | Slow virus infection and prion diseases of central nervous system              | 046      |
| Infectious diseases                                                                     |          | Meningitis due to enterovirus                                                  | 047      |
| Infectious diseases                                                                     |          | Other enterovirus diseases of central nervous system                           | 048      |
| Infectious diseases                                                                     |          | Other non-arthropod-borne viral diseases of central nervous system             | 049      |
| Infectious diseases                                                                     |          | Smallpox                                                                       | 050      |
| Infectious diseases                                                                     |          | Coxsack and parvovirus                                                         | 051      |
| Infectious diseases                                                                     |          | Chickengon                                                                     | 052      |
| Infectious diseases                                                                     |          | Herpes zoster                                                                  | 053      |
| Infectious diseases                                                                     |          | Herpes simplex                                                                 | 054      |
| Infectious diseases                                                                     |          | Measles                                                                        | 055      |
| Infectious diseases                                                                     |          | Rubella                                                                        | 056      |
| Infectious diseases                                                                     |          | Other viral exanthemata                                                        | 057      |
| Infectious diseases                                                                     |          | Other human herpesvirus                                                        | 058      |
| Infectious diseases                                                                     |          | Other poxvirus infections                                                      | 059      |
| Infectious diseases                                                                     |          | Yellow fever                                                                   | 060      |
| Infectious diseases                                                                     |          | Dengue                                                                         | 061      |
| Infectious diseases                                                                     |          | Mosquito-borne viral encephalitis                                              | 062      |
| Infectious diseases                                                                     |          | Tick-borne viral encephalitis                                                  | 063      |
| Infectious diseases                                                                     |          | Viral encephalitis transmitted by other and unspecified arthropods             | 064      |
| Infectious diseases                                                                     |          | Arthropod-borne hemorrhagic fever                                              | 065      |
| Infectious diseases                                                                     |          | Other arthropod-borne viral diseases                                           | 066      |
| Infectious diseases                                                                     |          | Viral hepatitis                                                                | 070      |
| Infectious diseases                                                                     |          | Rabies                                                                         | 071      |
| Infectious diseases                                                                     |          | Mumps                                                                          | 072      |
| Infectious diseases                                                                     |          | Ornithosis                                                                     | 073      |
| Infectious diseases                                                                     |          | Specific diseases due to coxsackie virus                                       | 074      |
| Infectious diseases                                                                     |          | Infectious mononucleosis                                                       | 075      |
| Infectious diseases                                                                     |          | Trachoma                                                                       | 076      |
| Infectious diseases                                                                     |          | Other diseases of conjunctiva due to viruses and chlamydiae                    | 077      |
| Infectious diseases                                                                     |          | Other diseases due to viruses and chlamydiae unspecified site                  | 078      |
| Infectious diseases                                                                     |          | Louse-borne (epidemic) typhus                                                  | 080      |
| Infectious diseases                                                                     |          | Other typhus                                                                   | 081      |
| Infectious diseases                                                                     |          | Tick-borne rickettsiosis                                                       | 082      |
| Infectious diseases                                                                     |          | Other rickettsiosis                                                            | 083      |
| Infectious diseases                                                                     |          | Malaria                                                                        | 084      |
| Infectious diseases                                                                     |          | Leishmaniasis                                                                  | 085      |
| Infectious diseases                                                                     |          | Trypanosomiasis                                                                | 086      |
| Infectious diseases                                                                     |          | Relapsing fever                                                                | 087      |
| Infectious diseases                                                                     |          | Other arthropod-borne diseases                                                 | 088      |
| Infectious diseases                                                                     |          | Congenital syphilis                                                            | 090      |
| Infectious diseases                                                                     |          | Early syphilis symptomatic                                                     | 091      |
| Infectious diseases                                                                     |          | Early syphilis latent                                                          | 092      |
| Infectious diseases                                                                     |          | Cardiovascular syphilis                                                        | 093      |
| Infectious diseases                                                                     |          | Neurosyphilis                                                                  | 094      |
| Infectious diseases                                                                     |          | Other forms of late syphilis with symptoms                                     | 095      |
| Infectious diseases                                                                     |          | Late syphilis, latent                                                          | 096      |
| Infectious diseases                                                                     |          | Other and unspecified syphilis                                                 | 097      |
| Infectious diseases                                                                     |          | Gonococcal infections                                                          | 098      |
| Infectious diseases                                                                     |          | Other venereal diseases                                                        | 099      |
| Infectious diseases                                                                     |          | Leptospirosis                                                                  | 100      |
| Infectious diseases                                                                     |          | Vincent's angina                                                               | 101      |
| Infectious diseases                                                                     |          | Yaws                                                                           | 102      |
| Infectious diseases                                                                     |          | Pius                                                                           | 103      |
| Infectious diseases                                                                     |          | Other spirochetal infection                                                    | 104      |
| Infectious diseases                                                                     |          | Dermatophytosis                                                                | 110      |
| Infectious diseases                                                                     |          | Dermatomyiasis other and unspecified                                           | 111      |
| Infectious diseases                                                                     |          | Candidiasis                                                                    | 112      |
| Infectious diseases                                                                     |          | Coccidioidomycosis                                                             | 114      |
| Infectious diseases                                                                     |          | Histoplasmosis                                                                 | 115      |
| Infectious diseases                                                                     |          | Blastomycotic infection                                                        | 116      |
| Infectious diseases                                                                     |          | Other opportunistic mycoses                                                    | 117      |
| Infectious diseases                                                                     |          | Opportunistic mycoses                                                          | 118      |
| Infectious diseases                                                                     |          | Schistosomiasis (bilharziasis)                                                 | 120      |
| Infectious diseases                                                                     |          | Other traumatic infections                                                     | 121      |
| Infectious diseases                                                                     |          | Echinococcosis                                                                 | 122      |
| Infectious diseases                                                                     |          | Other cestode infection                                                        | 123      |
| Infectious diseases                                                                     |          | Trichinosis                                                                    | 124      |
| Infectious diseases                                                                     |          | Filarial infection and dracunculiasis                                          | 125      |
| Infectious diseases                                                                     |          | Ascystosomiasis and necatoriasis                                               | 126      |
| Infectious diseases                                                                     |          | Other intestinal helminthiasis                                                 | 127      |
| Infectious diseases                                                                     |          | Other and unspecified helminthiasis                                            | 128      |
| Infectious diseases                                                                     |          | Intestinal parasitism, unspecified                                             | 129      |
| Infectious diseases                                                                     |          | Toxoplasmosis                                                                  | 130      |
| Infectious diseases                                                                     |          | Trichomoniasis                                                                 | 131      |
| Infectious diseases                                                                     |          | Pediculosis and phthirus infestation                                           | 132      |
| Infectious diseases                                                                     |          | Acneosis                                                                       | 133      |
| Infectious diseases                                                                     |          | Other infestation                                                              | 134      |

| General Category       | ICD-9-CM | Condition                                                      | General Category | ICD-9-CM | Condition |
|------------------------|----------|----------------------------------------------------------------|------------------|----------|-----------|
| Infectious diseases    | 480      | Viral pneumonia                                                |                  |          |           |
| Infectious diseases    | 481      | Pneumococcal pneumonia [Streptococcus pneumoniae pneumonia]    |                  |          |           |
| Infectious diseases    | 482      | Other bacterial pneumonia                                      |                  |          |           |
| Infectious diseases    | 483      | Pneumonia due to other specified organism                      |                  |          |           |
| Infectious diseases    | 484      | Pneumonia in infectious diseases classified elsewhere          |                  |          |           |
| Infectious diseases    | 485      | Bronchopneumonia, organism unspecified                         |                  |          |           |
| Infectious diseases    | 486      | Pneumonia, organism unspecified                                |                  |          |           |
| Infectious diseases    | 487      | Influenza                                                      |                  |          |           |
| Respiratory conditions | 490      | Bronchitis, not specified as acute or chronic                  |                  |          |           |
| Respiratory conditions | 491      | Chronic bronchitis                                             |                  |          |           |
| Respiratory conditions | 492      | Emphysema                                                      |                  |          |           |
| Respiratory conditions | 493      | Asthma                                                         |                  |          |           |
| Respiratory conditions | 494      | Bronchiectasis                                                 |                  |          |           |
| Respiratory conditions | 495      | Extrinsic allergic alveolitis                                  |                  |          |           |
| Respiratory conditions | 496      | Chronic airway obstruction, not elsewhere classified           |                  |          |           |
| Respiratory conditions | 518.81   | Acute respiratory failure                                      |                  |          |           |
| Respiratory conditions | 518.82   | trauma and surgery                                             |                  |          |           |
| Bowel diseases/obesity | 555      | Regional enteritis                                             |                  |          |           |
| Bowel diseases/obesity | 556      | Ulcerative enterocolitis                                       |                  |          |           |
| Infectious diseases    | 680      | Carbuncle and furuncle                                         |                  |          |           |
| Infectious diseases    | 681      | Cellulitis and abscess of finger and toe                       |                  |          |           |
| Infectious diseases    | 682      | Other cellulitis and abscess                                   |                  |          |           |
| Infectious diseases    | 683      | Acute lymphadenitis                                            |                  |          |           |
| Infectious diseases    | 684      | Impetigo                                                       |                  |          |           |
| Infectious diseases    | 685      | Pilonidal cyst                                                 |                  |          |           |
| Infectious diseases    | 686      | Other local infections of skin and subcutaneous tissue         |                  |          |           |
| Rheumatic disorder     | 714.0    | Rheumatoid arthritis                                           |                  |          |           |
| Rheumatic disorder     | 715.15   | Osteoarthritis, localized, primary, pelvic region and thigh    |                  |          |           |
| Rheumatic disorder     | 715.16   | Osteoarthritis, localized, primary, lower leg                  |                  |          |           |
| Rheumatic disorder     | 715.17   | Osteoarthritis, localized, primary, ankle and foot             |                  |          |           |
| Rheumatic disorder     | 715.25   | Osteoarthritis, localized, secondary, pelvic region and thigh  |                  |          |           |
| Rheumatic disorder     | 715.26   | Osteoarthritis, localized, secondary, lower leg                |                  |          |           |
| Rheumatic disorder     | 715.27   | Osteoarthritis, localized, secondary, ankle and foot           |                  |          |           |
| Rheumatic disorder     | 715.35   | pelvic region and thigh                                        |                  |          |           |
| Rheumatic disorder     | 715.36   | lower leg                                                      |                  |          |           |
| Rheumatic disorder     | 715.37   | ankle and foot                                                 |                  |          |           |
| Rheumatic disorder     | 724.2    | Lumbago                                                        |                  |          |           |
| Rheumatic disorder     | 724.3    | Sciatica                                                       |                  |          |           |
| Rheumatic disorder     | 733.13   | Pathological fracture of vertebrae                             |                  |          |           |
| Infectious diseases    | 730      | Osteomyelitis, periostitis and other infections involving bone |                  |          |           |
| Respiratory conditions | 748.61   | Congenital bronchiectasis                                      |                  |          |           |
| Neurologic disorders   | 780.01   | Coma                                                           |                  |          |           |
| Sepsis                 | 790.7    | Bacteremia                                                     |                  |          |           |
| Sepsis                 | 995.91   | Sepsis                                                         |                  |          |           |
| Sepsis                 | 995.92   | Severe sepsis                                                  |                  |          |           |
| Infectious diseases    | 996.6    | graft                                                          |                  |          |           |
| Infectious diseases    | 997.62   | Infection (chronic) of amputation stump                        |                  |          |           |
| Infectious diseases    | 998.3    | Disruption of operation wound                                  |                  |          |           |
| Infectious diseases    | 998.5    | Postoperative infection not elsewhere classified               |                  |          |           |
| Infectious diseases    | 999.3    | Other infection due to medical care not elsewhere classified   |                  |          |           |

## Appendix C<sup>e</sup>

**Table.** HCPCS codes for parenteral anticoagulants

| Drug                         | HCPCS Code   |
|------------------------------|--------------|
| Low Molecular Weight Heparin |              |
| Dalteparin                   | J1645        |
| Enoxaparin                   | J1650        |
| Tinzaparin                   | J1655        |
| Heparin                      | J1642, J1644 |
| Fondaparinux                 | J1652        |

<sup>e</sup> Codes from the NDC system were also be used to characterize use of PAC.



**Appendix D****Table.** NDC codes for other oral anticoagulants

| Brand Name | Generic Name                  | NDC Code      | Form | Strength     | Route |
|------------|-------------------------------|---------------|------|--------------|-------|
| Pradaxa    | Dabigatran etexilate mesylate | 00597-0107-54 | CAP  | 75 mg        | ORAL  |
|            |                               | 00597-0107-60 | CAP  | 75 mg        | ORAL  |
|            |                               | 00597-0108-60 | CAP  | 110 mg       | ORAL  |
|            |                               | 00597-0135-54 | CAP  | 150 mg       | ORAL  |
|            |                               | 00597-0135-60 | CAP  | 150 mg       | ORAL  |
|            |                               | 00597-0149-54 | CAP  | 75 mg        | ORAL  |
|            |                               | 00597-0149-60 | CAP  | 75 mg        | ORAL  |
|            |                               | 21695-0899-60 | CAP  | 150 mg       | ORAL  |
|            |                               | 54569-6276-00 | CAP  | 150 mg       | ORAL  |
| Xarelto    | Rivaroxaban                   | 42254-0376-01 | TAB  | 20 mg        | ORAL  |
|            |                               | 50458-0578-10 | TAB  | 15 mg        | ORAL  |
|            |                               | 50458-0578-30 | TAB  | 15 mg        | ORAL  |
|            |                               | 50458-0578-90 | TAB  | 15 mg        | ORAL  |
|            |                               | 50458-0579-10 | TAB  | 20 mg        | ORAL  |
|            |                               | 50458-0579-30 | TAB  | 20 mg        | ORAL  |
|            |                               | 50458-0579-90 | TAB  | 20 mg        | ORAL  |
|            |                               | 50458-0580-10 | TAB  | 10 mg        | ORAL  |
|            |                               | 50458-0580-30 | TAB  | 10 mg        | ORAL  |
|            |                               | 50458-0584-51 | TAB  | 15 mg; 20 mg | ORAL  |
| Savaysa    | Edoxaban                      | 65597-0201-30 | TAB  | 15 mg        | ORAL  |
|            |                               | 65597-0202-05 | TAB  | 30 mg        | ORAL  |
|            |                               | 65597-0202-30 | TAB  | 30 mg        | ORAL  |
|            |                               | 65597-0202-90 | TAB  | 30 mg        | ORAL  |
|            |                               | 65597-0203-05 | TAB  | 60 mg        | ORAL  |
|            |                               | 65597-0203-30 | TAB  | 60 mg        | ORAL  |
|            |                               | 65597-0203-90 | TAB  | 60 mg        | ORAL  |

Appendix E<sup>f</sup>**Table.** Codes for exclusionary conditions and procedures

| Condition/Procedure                              | Diagnosis Codes                                              | Procedure Codes                                                                                                                                                                                                                                                                                                                                                                                                                                                                                  |
|--------------------------------------------------|--------------------------------------------------------------|--------------------------------------------------------------------------------------------------------------------------------------------------------------------------------------------------------------------------------------------------------------------------------------------------------------------------------------------------------------------------------------------------------------------------------------------------------------------------------------------------|
| Atrial Fibrillation/Flutter                      | 427.31, 427.32                                               |                                                                                                                                                                                                                                                                                                                                                                                                                                                                                                  |
| Chemotherapy                                     |                                                              | See below                                                                                                                                                                                                                                                                                                                                                                                                                                                                                        |
| Radiation Therapy                                |                                                              | 77280, 77285, 77290, 77295, 77299, 77300, 77301, 77305, 77310, 77315, 77321, 77326, 77327, 77328, 77331, 77332, 77333, 77334, 77336, 77338, 77371, 77372, 77373, 77399, 77401, 77402, 77403, 77404, 77406, 77407, 77408, 77409, 77411, 77412, 77413, 77414, 77416, 77417, 77418, 77421, 77422, 77423, 77424, 77425, 77427, 77431, 77432, 77435, 77469, 77470, 77499, 77520, 77522, 77523, 77525, 77750, 77761, 77762, 77763, 77776, 77777, 77778, 77785, 77786, 77787, 77789, 77799, 92.20-92.29 |
| Malignant Neoplasm (excluding non-melanoma skin) | 140-209.3<br>(excluding 173)                                 |                                                                                                                                                                                                                                                                                                                                                                                                                                                                                                  |
| IVCF                                             |                                                              | ICD-9: 38.7x<br>CPT: 37191, 37192, 37193, 37620                                                                                                                                                                                                                                                                                                                                                                                                                                                  |
| Pregnancy/Postpartum Care                        | 630-679, V22, V23, V24, V27, V28, V61.6, V61.7, 792.3, 796.5 | ICD-9: 72.00-75.99<br>CPT: 59000-59350, 59400-59430, 59510-59866, 59870-59899, 76801-76828, 83661-83664                                                                                                                                                                                                                                                                                                                                                                                          |

<sup>f</sup> Corresponding ICD-10-CM codes are available upon request.

| <b>Table. List of chemotherapy agents</b> |                                                                                                  |
|-------------------------------------------|--------------------------------------------------------------------------------------------------|
| <b>Chemotherapy Drug/Administration</b>   | <b>HCPCS Level II Codes</b>                                                                      |
| ALDESLEUKIN                               | J9015                                                                                            |
| ALEMTUZUMAB                               | C9110, S0087                                                                                     |
| ARSENIC TRIOXIDE                          | C9012                                                                                            |
| ASPARAGINASE                              | J9020                                                                                            |
| AZACITIDINE                               | C9218, J9025                                                                                     |
| BENDAMUSTINE                              | C9243, J9033                                                                                     |
| BEVACIZUMAB                               | J9035, C9214, C9257, Q2024, S0116                                                                |
| BLEOMYCIN                                 | C9417, J9040                                                                                     |
| BORTEZOMIB                                | C9207                                                                                            |
| BRENTUXIMAB                               | C9287, J9042                                                                                     |
| BUSULFAN                                  | C1178, J0594, J8510                                                                              |
| CABAZITAXEL                               | C9276, J9043                                                                                     |
| CAPECITABINE                              | J8520, J8521                                                                                     |
| CARBOPLATIN                               | J9045                                                                                            |
| CARMUSTINE                                | C9437, J9050                                                                                     |
| CETUXIMAB                                 | C9215, J9055                                                                                     |
| CHEMO -- unknown                          | J9999                                                                                            |
| CHLORAMBUCIL                              | S0172                                                                                            |
| CISPLATIN                                 | C9418, J9060, J9062                                                                              |
| CLADRIBINE                                | C9419, J9065                                                                                     |
| CLOFARABINE                               | C9129, J9027                                                                                     |
| CYCLOPHOSPHAMIDE                          | C9420, C9421, J8530, J9070, J9080, J9090, J9091, J9092, J9093, C1166, C9422, J9098, J9100, J9110 |
| CYTARABINE                                | J9130, J9140, C9423                                                                              |
| DACARBAZINE                               | J9120                                                                                            |
| DACTINOMYCIN                              | J9150, J951, C9424                                                                               |
| DECITABINE                                | C9231, J0894                                                                                     |
| DENILEUKIN DIFTITOX                       | C1084, J9160                                                                                     |
| DOCETAXEL                                 | J9170, J9171                                                                                     |
| DOXORUBICIN                               | C9415, J9000                                                                                     |
| DOXORUBICIN LIPOSOMAL                     | J9001, J9002, Q2048, Q2049, Q2050                                                                |
| EPIRUBICIN                                | J9178, C1167, J9180                                                                              |
| ERIBULIN                                  | J9179, C9280                                                                                     |
| ETOPOSIDE                                 | J9181, J9182, C9414, C9425, J8560                                                                |
| EVEROLIMUS                                | J8561                                                                                            |
| FLOXURIDINE                               | J9200, C9426                                                                                     |
| FLUDARABINE                               | J9185, C9262, Q2025, J8562                                                                       |
| FLUOROURACIL                              | J9190                                                                                            |
| GEFITINIB                                 | J8565                                                                                            |
| GEMCITABINE                               | J9201                                                                                            |
| GEMTUZUMAB                                | C9004, J9300                                                                                     |
| HYDROXYUREA                               | S0176                                                                                            |
| IBRITUMOMAB                               | A9542                                                                                            |
| IBRUTINIB                                 | J8999                                                                                            |
| IDARUBICIN                                | J9211, C9429                                                                                     |
| IDELALISIB                                | J8999                                                                                            |
| IFOSFAMIDE                                | J9208, C9427                                                                                     |
| IMATINIB                                  | S0088                                                                                            |
| IPILIMUMAB                                | J9228, C9284                                                                                     |
| IRINOTECAN                                | J9206                                                                                            |
| IXABEPILONE                               | J9207, C9240                                                                                     |
| KADCYLA                                   | C9131, J9354                                                                                     |
| LEUCOVORIN                                | J0640                                                                                            |
| LEVOLEUCOVORIN                            | J0641                                                                                            |
| LOMUSTINE                                 | C9017, S0178                                                                                     |
| MECHLORETHAMINE                           | J9230                                                                                            |
| MELPHALAN                                 | J9245, J8600                                                                                     |

| <b>Chemotherapy Drug/Administration</b> | <b>HCPCS Level II Codes</b> |
|-----------------------------------------|-----------------------------|
| MERCAPTOPURINE                          | S0108                       |
| METHOTREXATE                            | J9250, J9260, J8610         |
| MITOMYCIN                               | J9280, J9290, J9291, C9432  |
| MITOXANTRONE                            | J9293                       |
| NELARABINE                              | J9261                       |
| OFATUMUMAB                              | J9302                       |
| OXALIPLATIN                             | C9205, J9263                |
| PACLITAXEL                              | C9127, C9431, J9264, J9265  |
| PANITUMUMAB                             | C9235, J9303                |
| PEGASPARGASE                            | J9266                       |
| PEMETREXED                              | C9213, J9305                |
| PENTOSTATIN                             | J9268                       |
| PERTUZUMAB                              | C9292                       |
| PLICAMYCIN                              | J9270                       |
| PRALATREXATE                            | C9259, J9307                |
| PROCARBAZINE                            | S0182                       |
| REGORAFENIB                             | J8999                       |
| RITUXIMAB                               | J9310                       |
| ROMIDEPSIN                              | C9265, J9325                |
| STREPTOZOCIN                            | J9320                       |
| TEMOZOLOMIDE                            | C1086, C9253, J9328, J8700  |
| TEMSIROLIMUS                            | C9239, J9330                |
| TENIPOSIDE                              | Q2017                       |
| THIOTEPA                                | C9433, J9340                |
| TOPOTECAN                               | J9350, J9351, J8705         |
| TOSITUMOMAB                             | G3001                       |
| TRASTUZUMAB                             | J9355                       |
| TRETINOIN                               | S0117                       |
| VALRUBICIN                              | J9357                       |
| VINBLASTINE                             | J9360                       |
| VINCRIStINE                             | J9370, J9375, J9380         |
| VINCRIStINE LIPOSOMAL                   | J9371                       |
| VINORELBINE                             | C9440, J9390                |
| ZALTRAP                                 | J9400                       |

**Table.** List of chemotherapy administration codes

| HCPCS Level I/II Codes | Description                                                                      |
|------------------------|----------------------------------------------------------------------------------|
| 36640                  | Arterial catheterization for prolonged infusion therapy (chemotherapy), cutdown  |
| 61517                  | Implantation of brain intracavitary chemotherapy agent (list separately in addit |
| 96401                  | Chemotherapy administration, subcutaneous or intramuscular; non-hormonal anti-ne |
| 96402                  | Chemotherapy administration, subcutaneous or intramuscular; hormonal anti-neopla |
| 96405                  | Chemotherapy administration; intralesional, up to and including 7 lesions        |
| 96406                  | Chemotherapy administration; intralesional, more than 7 lesions                  |
| 96409                  | Chemotherapy administration; intravenous, push technique, single or initial subs |
| 96411                  | Chemotherapy administration; intravenous, push technique, each additional substa |
| 96413                  | Chemotherapy administration, intravenous infusion technique; up to 1 hour, singl |
| 96415                  | Chemotherapy administration, intravenous infusion technique; each additional hou |
| 96416                  | Chemotherapy administration, intravenous infusion technique; initiation of prolo |
| 96417                  | Chemotherapy administration, intravenous infusion technique; each additional seq |
| 96420                  | Chemotherapy administration, intra-arterial; push technique                      |
| 96422                  | Chemotherapy administration, intra-arterial; infusion technique, up to one hour  |
| 96423                  | Chemotherapy administration, intra-arterial; infusion technique, each additional |
| 96425                  | Chemotherapy administration, intra-arterial; infusion technique, initiation of p |
| 96440                  | Chemotherapy administration into pleural cavity, requiring and including thorace |
| 96445                  | Chemotherapy administration into peritoneal cavity, requiring and including peri |
| 96446                  | Chemotherapy administration into the peritoneal cavity via indwelling port or ca |
| 96450                  | Chemotherapy administration, into CNS (eg, intrathecal), requiring and including |
| 96542                  | Chemotherapy injection, subarachnoid or intraventricular via subcutaneous reserv |
| 96549                  | Unlisted chemotherapy procedure                                                  |
| 99555                  | Home infuse, chemotherapy                                                        |
| Q0083                  | Chemotherapy administration by other than infusion technique only (eg subcutaneo |
| Q0084                  | Chemotherapy administration by infusion technique only, per visit                |
| Q0085                  | Chemotherapy administration by both infusion technique and other technique(s) (e |
| S9329                  | Home infusion therapy, chemotherapy infusion; administrative services, professio |
| S9330                  | Home infusion therapy, continuous (twenty-four hours or more) chemotherapy infus |
| S9331                  | Home infusion therapy, intermittent (less than twenty-four hours) chemotherapy i |

**Appendix F**<sup>9</sup> Deyo–Charlson Comorbidity Index

| Diagnostic Category              | ICD-9-CM codes                             | Points |
|----------------------------------|--------------------------------------------|--------|
| Myocardial Infarction            | 410, 412                                   | 1      |
| Congestive Heart Failure         | 428–428.9                                  | 1      |
| Peripheral Vascular Disease      | 443.9, 441–441.9, 785.4, V43.4; 38.48 (Px) | 1      |
| Cerebrovascular Disease          | 430–438                                    | 1      |
| Dementia                         | 290–290.9                                  | 1      |
| Rheumatologic Disease            | 710.1, 710.4, 714.0–714.2, 714.81, 725     | 1      |
| Peptic Ulcer Disease             | 531–534.9                                  | 1      |
| Mild Liver Disease               | 571.2, 571.5, 571.6, 571.4–571.49,         | 1      |
| Diabetes                         | 250–250.3, 250.7                           | 1      |
| Diabetes w/ Complications        | 250.4–250.6                                | 2      |
| Hemiplegia or Paraplegia         | 344.1, 342–342.9                           | 2      |
| Renal Disease                    | 582–582.9, 583–583.7, 585, 586, 588–588.9  | 2      |
| Any Malignancy                   | 140–172.9, 174–195.8, 200–208.9            | 2      |
| Moderate or Severe Liver Disease | 572.2–572.8, 456.0–456.21                  | 3      |
| Metastatic Solid Tumour          | 196–199.1                                  | 6      |
| AIDS                             | 042–044.9                                  | 6      |

<sup>9</sup> Corresponding ICD-10-CM codes are available upon request.

Appendix G<sup>h</sup>

Table. Covariates -- variable types/definitions, operational algorithms, and codes

| Covariate                                        | Variable Type and Definition                                     | Operational Algorithm                                                                                                                                                                                                                                                                                                                                                                                                                                                                                                                                                                                                                                                                                                                                                                                                                                                                                                                                                                                                           |
|--------------------------------------------------|------------------------------------------------------------------|---------------------------------------------------------------------------------------------------------------------------------------------------------------------------------------------------------------------------------------------------------------------------------------------------------------------------------------------------------------------------------------------------------------------------------------------------------------------------------------------------------------------------------------------------------------------------------------------------------------------------------------------------------------------------------------------------------------------------------------------------------------------------------------------------------------------------------------------------------------------------------------------------------------------------------------------------------------------------------------------------------------------------------|
| <b>Demographics</b>                              |                                                                  |                                                                                                                                                                                                                                                                                                                                                                                                                                                                                                                                                                                                                                                                                                                                                                                                                                                                                                                                                                                                                                 |
| Age                                              | Continuous: Categorical: 18-19, 50-64, 65-74, >=75               | Based on year of index therapy initiation                                                                                                                                                                                                                                                                                                                                                                                                                                                                                                                                                                                                                                                                                                                                                                                                                                                                                                                                                                                       |
| Gender                                           | Categorical: Male vs. female                                     |                                                                                                                                                                                                                                                                                                                                                                                                                                                                                                                                                                                                                                                                                                                                                                                                                                                                                                                                                                                                                                 |
| U.S. Geographical Region                         | Categorical: non-Hispanic white, non-Hispanic black, west, other |                                                                                                                                                                                                                                                                                                                                                                                                                                                                                                                                                                                                                                                                                                                                                                                                                                                                                                                                                                                                                                 |
| Insurance Coverage                               | Categorical: comprehensive, HMO, PPO, POS, Other                 |                                                                                                                                                                                                                                                                                                                                                                                                                                                                                                                                                                                                                                                                                                                                                                                                                                                                                                                                                                                                                                 |
| Physician Specialty                              | Categorical: based on empirical data                             |                                                                                                                                                                                                                                                                                                                                                                                                                                                                                                                                                                                                                                                                                                                                                                                                                                                                                                                                                                                                                                 |
| <b>Comorbidity Profile</b>                       |                                                                  |                                                                                                                                                                                                                                                                                                                                                                                                                                                                                                                                                                                                                                                                                                                                                                                                                                                                                                                                                                                                                                 |
| <b>Devo-Charlson Comorbidity Index</b>           | Continuous                                                       | The Devo-Charlson Comorbidity Index will be based on information available during the pre-index period:<br>0 1 point: myocardial infarction, congestive heart failure, peripheral vascular disease, dementia, cerebrovascular disease, chronic pulmonary disease, rheumatologic disease, peptic ulcer disease, mild liver disease, diabetes (mild to moderate)<br>0 2 points: hemiplegia or paraplegia, renal disease, diabetes with complication, any malignancy (leukemia, lymphoma)<br>0 3 points: moderate or severe liver disease<br>0 6 points: malignant tumor, acquired immunodeficiency syndrome (AIDS)<br>>=1 diagnosis during 6-month baseline period                                                                                                                                                                                                                                                                                                                                                                |
| <b>Acquired Immunodeficiency Syndrome (AIDS)</b> | Categorical: yes, no                                             | 042, V08<br>780 3, E880 0, E880 1<br>PX (ICD-9): 04.48, 04.53, 04.61-04.63, 04.07-04.69<br>PX (CPT): 98408, 98409, C0306, C0397, H0049, H0050<br>RX: alcohol abstinence                                                                                                                                                                                                                                                                                                                                                                                                                                                                                                                                                                                                                                                                                                                                                                                                                                                         |
| <b>Alcohol Abuse</b>                             | Categorical: yes, no                                             | >=1 diagnosis, procedure, drug during 6-month baseline period                                                                                                                                                                                                                                                                                                                                                                                                                                                                                                                                                                                                                                                                                                                                                                                                                                                                                                                                                                   |
| <b>Anemia</b>                                    | Categorical: yes, no                                             | >=1 diagnosis, procedure, drug during 6-month baseline period<br>280.1x-285.x                                                                                                                                                                                                                                                                                                                                                                                                                                                                                                                                                                                                                                                                                                                                                                                                                                                                                                                                                   |
| <b>Bleeding</b>                                  | Categorical: yes, no                                             | >=1 diagnosis during 6-month baseline period<br>853.0x<br>Gastrointestinal bleeding: 455.2, 455.5, 455.8, 456.0x, 456.20, 530.7x, 530.82, 531.00, 531.01, 531.20, 531.21, 531.40, 531.41, 531.60, 531.61, 532.00, 532.01, 532.20, 532.21, 532.40, 532.41, 532.60, 532.61, 533.00, 533.01, 533.20, 533.21, 533.40, 533.41, 533.60, 533.61, 534.00, 534.01, 534.20, 534.21, 534.40, 534.41, 534.60, 534.61, 535.01, 535.11, 535.21, 535.31, 535.41, 535.51, 535.61, 537.83, 537.84, 562.02, 562.03, 562.12, 562.13, 568.81, 569.3x or 569.85, 569.86, 578.0x, 578.1x, 578.9x<br>Intracranial hemorrhage: 430.xx, 431.xx, 432.0x, 432.1x, 432.9x, 852.xx, 853.0x<br>Other hemorrhage: 078.6x, 246.3x, 285.1, 286.5, 388.69, 360.43, 362.43, 362.81, 363.61, 363.62, 363.72, 364.41, 372.72, 374.81, 376.32, 377.42, 379.23, 423.0x, 459.0x, 593.81, 596.7x, 599.7x, 602.1x, 620.1x, 621.4x, 626.2x, 626.5x, 626.7x, 626.8x, 626.9x, 640.8x, 641.9x, 666.1x, 719.1x, 782.7x, 784.7x, 784.8x, 786.3x, 790.01, 948.2x, 997.02, 998.11 |
| <b>Central Venous Catheter</b>                   | Categorical: yes, no                                             | >=1 diagnosis, procedure during 6-month baseline period<br>DX: 999.31, 999.32, 999.33<br>PX (ICD-9): 38.93, 38.95, 38.97, 89.62<br>PX (CPT): 36555-36569, S5520, S5522                                                                                                                                                                                                                                                                                                                                                                                                                                                                                                                                                                                                                                                                                                                                                                                                                                                          |
| <b>Cerebrovascular Disease (stroke and TIA)</b>  | Categorical: yes, no                                             | >=1 diagnosis, procedure during 6-month baseline period<br>DX: 430, 431, 432.x, 433.xx, 434.xx, 435.x, 436, 437.0, 437.1, 437.8, 437.9, 438.xx, 997.02<br>PX (CPT): 35390, 37215, 37216<br>PX (ICD-9): 38.11, 38.12, 38.42<br>DX: 491.xx, 492.x, 496                                                                                                                                                                                                                                                                                                                                                                                                                                                                                                                                                                                                                                                                                                                                                                            |
| <b>Chronic Obstructive Pulmonary Disease</b>     | Categorical: yes, no                                             | >=1 diagnosis during 6-month baseline period                                                                                                                                                                                                                                                                                                                                                                                                                                                                                                                                                                                                                                                                                                                                                                                                                                                                                                                                                                                    |
| <b>Coagulopathy</b>                              | Categorical: yes, no                                             | >=1 diagnosis during 6-month baseline period<br>DX: 286.6, 286.7, 286.9                                                                                                                                                                                                                                                                                                                                                                                                                                                                                                                                                                                                                                                                                                                                                                                                                                                                                                                                                         |
| <b>Congestive Heart Failure</b>                  | Categorical: yes, no                                             | >=1 diagnosis during 6-month baseline period<br>DX: 398.91, 402.01, 402.11, 402.91, 404.01, 404.03, 404.11, 404.13, 404.91, 404.93, 428.xx<br>PX (CPT): 33930, 33933, 33935, 33940, 33944, 33945, 33960, 33961, 33967, 33968, 33970, 33971, 33973, 33974, 33975, 33976, 33977, 33978, 33979, 33980, 33981, 33982, 33983, 33990, 33991, 33992, 33993<br>PX (ICD-9): 37.20, 37.26, 37.37, 37.51, 37.52, 37.53, 37.54, 37.55, 37.60, 37.61, 37.62, 37.63, 37.64, 37.65, 37.66, 37.67, 37.68                                                                                                                                                                                                                                                                                                                                                                                                                                                                                                                                        |

<sup>h</sup> Corresponding ICD-10-CM codes are available upon request.



Table. Covariates -- variable types/definitions, operational algorithms, and codes

| Covariate                                      | Variable Type and Definition              | Operational Algorithm                                                                                                                          | Diagnosis/Procedure/Drug Codes             |
|------------------------------------------------|-------------------------------------------|------------------------------------------------------------------------------------------------------------------------------------------------|--------------------------------------------|
| <b>Pharmacotherapy</b>                         |                                           |                                                                                                                                                |                                            |
| ACE inhibitors/ARBs                            | Categorical: yes, no                      | >=1 drug during 6-month baseline period                                                                                                        | RX: NDCs for corresponding drug/drug class |
| Antiarrhythmics                                | Categorical: yes, no                      | >=1 drug during 6-month baseline period                                                                                                        | RX: NDCs for corresponding drug/drug class |
| Antiplatelets                                  | Categorical: yes, no                      | >=1 drug during 6-month baseline period                                                                                                        | RX: NDCs for corresponding drug/drug class |
| Aromatase inhibitors                           | Categorical: yes, no                      | >=1 drug during 6-month baseline period                                                                                                        | RX: NDCs for corresponding drug/drug class |
| Beta blockers                                  | Categorical: yes, no                      | >=1 drug during 6-month baseline period                                                                                                        | RX: NDCs for corresponding drug/drug class |
| Calcium channel blockers                       | Categorical: yes, no                      | >=1 drug during 6-month baseline period                                                                                                        | RX: NDCs for corresponding drug/drug class |
| Contraceptives (oral)                          | Categorical: yes, no                      | >=1 drug during 6-month baseline period                                                                                                        | RX: NDCs for corresponding drug/drug class |
| Erythropoiesis stimulating agents              | Categorical: yes, no                      | >=1 drug during 6-month baseline period                                                                                                        | RX: NDCs for corresponding drug/drug class |
| Gastroprotective agents                        | Categorical: yes, no                      | >=1 drug during 6-month baseline period                                                                                                        | RX: NDCs for corresponding drug/drug class |
| Hormones                                       | Categorical: yes, no                      | >=1 drug during 6-month baseline period                                                                                                        | RX: NDCs for corresponding drug/drug class |
| NSAIDs                                         | Categorical: yes, no                      | >=1 drug during 6-month baseline period                                                                                                        | RX: NDCs for corresponding drug/drug class |
| SERMs                                          | Categorical: yes, no                      | >=1 drug during 6-month baseline period                                                                                                        | RX: NDCs for corresponding drug/drug class |
| Statins                                        | Categorical: yes, no                      | >=1 drug during 6-month baseline period                                                                                                        | RX: NDCs for corresponding drug/drug class |
| <b>Healthcare Utilization and Expenditures</b> |                                           |                                                                                                                                                |                                            |
| Expenditures for any reason                    | Continuous                                | Measures of all-cause health care costs during the 6-month baseline period will be computed for: MD, ED, hospitalizations, and RX (outpatient) |                                            |
| Expenditures for bleeding-related events       | Continuous                                | Measures of bleeding-related health care costs during the 6-month baseline period will be computed for: MD, ED, hospitalizations               |                                            |
| Utilization for any reason                     | Continuous; Categorical: 0, 1-3, 4-5, >=6 | Measures of all-cause HRU during the 6-month baseline period will be computed for: MD, ED, hospitalizations, and RX (outpatient)               |                                            |
| Utilization for bleeding-related events        | Continuous; Categorical: 0, 1-3, 4-5, >=6 | Measures of bleeding-related HRU during the 6-month baseline period will be computed for: MD, ED, hospitalizations, and RX (outpatient)        |                                            |



Appendix H<sup>i</sup>**Table.** Factors identifying provoked VTE

| Factors                                         | Identifying Strategies                                                                                                                                                                                                                                                                                                                                                                                        |
|-------------------------------------------------|---------------------------------------------------------------------------------------------------------------------------------------------------------------------------------------------------------------------------------------------------------------------------------------------------------------------------------------------------------------------------------------------------------------|
| Hormone therapy                                 |                                                                                                                                                                                                                                                                                                                                                                                                               |
| Estrogen Therapy                                | ESTRADIOL CYPIONATE<br>ESTRADIOL VALERATE<br>ESTRADIOL<br>ETHINYL ESTRADIOL<br>ESTRADIOL BENZOATE<br>ESTRADIOL ACETATE<br>ESTRADIOL MICRONIZED<br>ESTRONE<br>ESTROGENS, CONJUGATED/MEPROBAM<br>ESTROGENS, CONJUGATED<br>ESTRIOL<br>CHLOROTRIANISENE<br>QUINESTROL<br>DIENESTROL<br>ESTROGENS,ESTERIFIED<br>ESTROPIPATE<br>ESTROGENS, CONJ., SYNTHETIC A<br>ESTROGENS,CONJ., SYNTHETIC B<br>ESTRIOL MICRONIZED |
| Combination E+P                                 | ETHINYL ESTRADIOL/NORETH AC<br>NORETHIND AC/ETHINYL ESTRADIOL<br>ESTRADIOL/NORETH AC<br>ESTRADIOL/NORGESTIMATE<br>ESTRADIOL/LEVONORGESTREL<br>ESTRADIOL/DROSPIRENONE<br>ESTROGEN, CON/M-PROGEST ACET                                                                                                                                                                                                          |
| Fracture/Trauma involving the Lower Extremities | ICD-9-CM: 820-828, 835-838, 890-897, 904, 928.0-928.3, 928.8, 928.9, 945, 956, 959.6, 959.7                                                                                                                                                                                                                                                                                                                   |
| Pelvic or orthopedic surgery                    | ICD-9-CM procedure code: 77.5-77.9, 78.5-78.9, 79.5-79.9, 80.5-80.9, 81                                                                                                                                                                                                                                                                                                                                       |
| Any hospitalization                             | Any acute-care inpatient stay from medical claims                                                                                                                                                                                                                                                                                                                                                             |

<sup>i</sup> Corresponding ICD-10-CM codes are available upon request

Online Supplement – Table 1. Selection of patients receiving apixaban or warfarin as outpatient therapy for VTE

| Inclusion/Exclusion Criteria<br>Selection of Subjects                                                         | Humans (n [%])   |                  | Market Size (n [%]) |                | Outpatient (n [%]) |                | Pharmetrics (n [%]) |                | Total            |                | Total Population (n [%]) |                    |
|---------------------------------------------------------------------------------------------------------------|------------------|------------------|---------------------|----------------|--------------------|----------------|---------------------|----------------|------------------|----------------|--------------------------|--------------------|
|                                                                                                               | Apixaban         | Warfarin         | Apixaban            | Warfarin       | Apixaban           | Warfarin       | Apixaban            | Warfarin       | Apixaban         | Warfarin       | Apixaban                 | Warfarin           |
| <b>Inclusion criteria:</b>                                                                                    |                  |                  |                     |                |                    |                |                     |                |                  |                |                          |                    |
| Aged ≥18 years with diagnosis of VTE from September 1, 2014 to June 30, 2017.                                 | 22,647 (100.0%)  | 380,031 (100.0%) | ---                 | ---            | ---                | ---            | ---                 | ---            | 463,551 (100.0%) | ---            | ---                      | 1,386,331 (100.0%) |
| Setting: Outpatient                                                                                           | 68,128 (100.0%)  | 76,105 (100.0%)  | ---                 | ---            | ---                | ---            | ---                 | ---            | 114,633 (100.0%) | ---            | ---                      | 380,031 (100.0%)   |
| Outpatient Care                                                                                               | 136,527 (100.0%) | 305,860 (100.0%) | ---                 | ---            | ---                | ---            | ---                 | ---            | 348,868 (100.0%) | ---            | ---                      | 1,003,331 (72.4%)  |
| <b>Diagnosis:</b>                                                                                             |                  |                  |                     |                |                    |                |                     |                |                  |                |                          |                    |
| Diagnosis of PE (with or without DVT)                                                                         | 6,428 (10.0%)    | 110,426 (29.1%)  | ---                 | ---            | ---                | ---            | ---                 | ---            | 132,802 (18.6%)  | ---            | ---                      | 406,084 (29.3%)    |
| Diagnosis of DVT Only                                                                                         | 155,233 (100.0%) | 283,399 (73.9%)  | ---                 | ---            | ---                | ---            | ---                 | ---            | 330,499 (71.4%)  | ---            | ---                      | 979,250 (70.7%)    |
| Prevalence: Unprovoked                                                                                        | 67,668 (10.5%)   | 94,834 (25.0%)   | ---                 | ---            | ---                | ---            | ---                 | ---            | 162,502 (17.6%)  | ---            | ---                      | 347,036 (25.1%)    |
| plus ≥1 outpatient pharmacy claim for apixaban or warfarin during 30-day period following the index encounter | 10,934 (4.5%)    | 40,709 (18.4%)   | 11,245 (13.0%)      | 62,640 (16.5%) | 10,987 (14.4%)     | 57,337 (17.9%) | 15,975 (16.4%)      | 76,117 (16.6%) | 92,090 (19.9%)   | 48,239 (13.5%) | 236,603 (17.1%)          | 838,226 (60.5%)    |
| Exclusion criteria:                                                                                           |                  |                  |                     |                |                    |                |                     |                |                  |                |                          |                    |
| plus no claims for conditions/procedures:                                                                     |                  |                  |                     |                |                    |                |                     |                |                  |                |                          |                    |
| No claims for atrial fibrillation/flutter during 6-month period prior to index therapy                        | 6,229 (2.8%)     | 23,253 (10.6%)   | 8,853 (4.4%)        | 48,547 (12.8%) | 6,672 (2.1%)       | 33,915 (10.6%) | 10,698 (2.3%)       | 54,109 (11.7%) | 64,605 (13.9%)   | 32,301 (2.3%)  | 160,148 (11.6%)          | 192,272 (13.9%)    |
| No claims for myocardial infarction during 6-month period prior to index therapy                              | 4,900 (2.2%)     | 19,724 (8.9%)    | 7,224 (2.6%)        | 41,581 (11.0%) | 5,673 (1.8%)       | 29,105 (9.1%)  | 9,245 (2.0%)        | 48,804 (10.3%) | 9,088 (12.5%)    | 27,886 (2.0%)  | 138,499 (10.0%)          | 166,994 (12.1%)    |
| No claims for malignancy during 90-day period prior to index therapy                                          | 4,852 (2.2%)     | 19,068 (8.6%)    | 7,357 (3.2%)        | 40,593 (10.7%) | 5,533 (1.7%)       | 28,148 (8.8%)  | 9,034 (1.9%)        | 47,399 (10.2%) | 56,433 (12.2%)   | 26,776 (1.9%)  | 135,118 (9.8%)           | 168,894 (12.2%)    |
| No claims for PCI during study period                                                                         | 4,830 (2.2%)     | 23,700 (10.8%)   | 7,332 (3.2%)        | 39,707 (10.4%) | 5,478 (1.7%)       | 27,755 (8.7%)  | 8,221 (1.8%)        | 41,674 (9.0%)  | 49,895 (10.8%)   | 25,761 (1.9%)  | 128,022 (9.2%)           | 153,789 (11.1%)    |
| No claims for pregnancy during study period                                                                   | 4,837 (2.2%)     | 18,888 (8.5%)    | 6,975 (3.1%)        | 37,264 (9.8%)  | 5,328 (1.6%)       | 28,416 (8.3%)  | 7,931 (1.7%)        | 39,467 (8.5%)  | 47,388 (10.2%)   | 24,971 (1.8%)  | 121,468 (8.8%)           | 143,279 (10.4%)    |
| plus no evidence of any OAC/PTC use during 30-day period prior to index encounter                             | 4,614 (2.1%)     | 18,011 (8.1%)    | 6,566 (2.9%)        | 34,681 (9.1%)  | 5,285 (1.6%)       | 28,262 (8.2%)  | 7,830 (1.7%)        | 39,292 (8.5%)  | 47,162 (10.2%)   | 24,661 (1.8%)  | 120,884 (8.7%)           | 143,279 (10.4%)    |
| plus no evidence of receipt of OAC during period between index encounter and index therapy initiation**       | 4,566 (2.1%)     | 17,000 (7.7%)    | 6,556 (2.9%)        | 33,131 (8.7%)  | 5,247 (1.6%)       | 28,387 (8.2%)  | 7,830 (1.7%)        | 38,859 (8.2%)  | 46,679 (10.0%)   | 24,289 (1.8%)  | 119,739 (8.6%)           | 143,279 (10.4%)    |
| plus no claims for VTE during 6-month period prior to index encounter                                         | 4,566 (2.1%)     | 17,000 (7.7%)    | 6,556 (2.9%)        | 33,131 (8.7%)  | 5,247 (1.6%)       | 28,387 (8.2%)  | 7,830 (1.7%)        | 38,859 (8.2%)  | 46,679 (10.0%)   | 24,289 (1.8%)  | 119,739 (8.6%)           | 143,279 (10.4%)    |
| plus evidence of PTC within +/- 14 days of warfarin initiation (ambulatory care only)                         | 4,566 (2.1%)     | 17,000 (7.7%)    | 6,556 (2.9%)        | 33,131 (8.7%)  | 5,247 (1.6%)       | 28,387 (8.2%)  | 7,830 (1.7%)        | 38,859 (8.2%)  | 46,679 (10.0%)   | 24,289 (1.8%)  | 119,739 (8.6%)           | 143,279 (10.4%)    |
| plus evidence of PTC within +/- 14 days of warfarin initiation (ambulatory care only)                         | 4,566 (2.1%)     | 17,000 (7.7%)    | 6,556 (2.9%)        | 33,131 (8.7%)  | 5,247 (1.6%)       | 28,387 (8.2%)  | 7,830 (1.7%)        | 38,859 (8.2%)  | 46,679 (10.0%)   | 24,289 (1.8%)  | 119,739 (8.6%)           | 143,279 (10.4%)    |
| plus evidence of PTC within +/- 14 days of warfarin initiation (ambulatory care only)                         | 4,566 (2.1%)     | 17,000 (7.7%)    | 6,556 (2.9%)        | 33,131 (8.7%)  | 5,247 (1.6%)       | 28,387 (8.2%)  | 7,830 (1.7%)        | 38,859 (8.2%)  | 46,679 (10.0%)   | 24,289 (1.8%)  | 119,739 (8.6%)           | 143,279 (10.4%)    |
| plus evidence of PTC within +/- 14 days of warfarin initiation (ambulatory care only)                         | 4,566 (2.1%)     | 17,000 (7.7%)    | 6,556 (2.9%)        | 33,131 (8.7%)  | 5,247 (1.6%)       | 28,387 (8.2%)  | 7,830 (1.7%)        | 38,859 (8.2%)  | 46,679 (10.0%)   | 24,289 (1.8%)  | 119,739 (8.6%)           | 143,279 (10.4%)    |
| plus evidence of PTC within +/- 14 days of warfarin initiation (ambulatory care only)                         | 4,566 (2.1%)     | 17,000 (7.7%)    | 6,556 (2.9%)        | 33,131 (8.7%)  | 5,247 (1.6%)       | 28,387 (8.2%)  | 7,830 (1.7%)        | 38,859 (8.2%)  | 46,679 (10.0%)   | 24,289 (1.8%)  | 119,739 (8.6%)           | 143,279 (10.4%)    |
| plus evidence of PTC within +/- 14 days of warfarin initiation (ambulatory care only)                         | 4,566 (2.1%)     | 17,000 (7.7%)    | 6,556 (2.9%)        | 33,131 (8.7%)  | 5,247 (1.6%)       | 28,387 (8.2%)  | 7,830 (1.7%)        | 38,859 (8.2%)  | 46,679 (10.0%)   | 24,289 (1.8%)  | 119,739 (8.6%)           | 143,279 (10.4%)    |
| plus evidence of PTC within +/- 14 days of warfarin initiation (ambulatory care only)                         | 4,566 (2.1%)     | 17,000 (7.7%)    | 6,556 (2.9%)        | 33,131 (8.7%)  | 5,247 (1.6%)       | 28,387 (8.2%)  | 7,830 (1.7%)        | 38,859 (8.2%)  | 46,679 (10.0%)   | 24,289 (1.8%)  | 119,739 (8.6%)           | 143,279 (10.4%)    |
| plus evidence of PTC within +/- 14 days of warfarin initiation (ambulatory care only)                         | 4,566 (2.1%)     | 17,000 (7.7%)    | 6,556 (2.9%)        | 33,131 (8.7%)  | 5,247 (1.6%)       | 28,387 (8.2%)  | 7,830 (1.7%)        | 38,859 (8.2%)  | 46,679 (10.0%)   | 24,289 (1.8%)  | 119,739 (8.6%)           | 143,279 (10.4%)    |
| plus evidence of PTC within +/- 14 days of warfarin initiation (ambulatory care only)                         | 4,566 (2.1%)     | 17,000 (7.7%)    | 6,556 (2.9%)        | 33,131 (8.7%)  | 5,247 (1.6%)       | 28,387 (8.2%)  | 7,830 (1.7%)        | 38,859 (8.2%)  | 46,679 (10.0%)   | 24,289 (1.8%)  | 119,739 (8.6%)           | 143,279 (10.4%)    |
| plus evidence of PTC within +/- 14 days of warfarin initiation (ambulatory care only)                         | 4,566 (2.1%)     | 17,000 (7.7%)    | 6,556 (2.9%)        | 33,131 (8.7%)  | 5,247 (1.6%)       | 28,387 (8.2%)  | 7,830 (1.7%)        | 38,859 (8.2%)  | 46,679 (10.0%)   | 24,289 (1.8%)  | 119,739 (8.6%)           | 143,279 (10.4%)    |
| plus evidence of PTC within +/- 14 days of warfarin initiation (ambulatory care only)                         | 4,566 (2.1%)     | 17,000 (7.7%)    | 6,556 (2.9%)        | 33,131 (8.7%)  | 5,247 (1.6%)       | 28,387 (8.2%)  | 7,830 (1.7%)        | 38,859 (8.2%)  | 46,679 (10.0%)   | 24,289 (1.8%)  | 119,739 (8.6%)           | 143,279 (10.4%)    |
| plus evidence of PTC within +/- 14 days of warfarin initiation (ambulatory care only)                         | 4,566 (2.1%)     | 17,000 (7.7%)    | 6,556 (2.9%)        | 33,131 (8.7%)  | 5,247 (1.6%)       | 28,387 (8.2%)  | 7,830 (1.7%)        | 38,859 (8.2%)  | 46,679 (10.0%)   | 24,289 (1.8%)  | 119,739 (8.6%)           | 143,279 (10.4%)    |
| plus evidence of PTC within +/- 14 days of warfarin initiation (ambulatory care only)                         | 4,566 (2.1%)     | 17,000 (7.7%)    | 6,556 (2.9%)        | 33,131 (8.7%)  | 5,247 (1.6%)       | 28,387 (8.2%)  | 7,830 (1.7%)        | 38,859 (8.2%)  | 46,679 (10.0%)   | 24,289 (1.8%)  | 119,739 (8.6%)           | 143,279 (10.4%)    |
| plus evidence of PTC within +/- 14 days of warfarin initiation (ambulatory care only)                         | 4,566 (2.1%)     | 17,000 (7.7%)    | 6,556 (2.9%)        | 33,131 (8.7%)  | 5,247 (1.6%)       | 28,387 (8.2%)  | 7,830 (1.7%)        | 38,859 (8.2%)  | 46,679 (10.0%)   | 24,289 (1.8%)  | 119,739 (8.6%)           | 143,279 (10.4%)    |
| plus evidence of PTC within +/- 14 days of warfarin initiation (ambulatory care only)                         | 4,566 (2.1%)     | 17,000 (7.7%)    | 6,556 (2.9%)        | 33,131 (8.7%)  | 5,247 (1.6%)       | 28,387 (8.2%)  | 7,830 (1.7%)        | 38,859 (8.2%)  | 46,679 (10.0%)   | 24,289 (1.8%)  | 119,739 (8.6%)           | 143,279 (10.4%)    |
| plus evidence of PTC within +/- 14 days of warfarin initiation (ambulatory care only)                         | 4,566 (2.1%)     | 17,000 (7.7%)    | 6,556 (2.9%)        | 33,131 (8.7%)  | 5,247 (1.6%)       | 28,387 (8.2%)  | 7,830 (1.7%)        | 38,859 (8.2%)  | 46,679 (10.0%)   | 24,289 (1.8%)  | 119,739 (8.6%)           | 143,279 (10.4%)    |
| plus evidence of PTC within +/- 14 days of warfarin initiation (ambulatory care only)                         | 4,566 (2.1%)     | 17,000 (7.7%)    | 6,556 (2.9%)        | 33,131 (8.7%)  | 5,247 (1.6%)       | 28,387 (8.2%)  | 7,830 (1.7%)        | 38,859 (8.2%)  | 46,679 (10.0%)   | 24,289 (1.8%)  | 119,739 (8.6%)           | 143,279 (10.4%)    |
| plus evidence of PTC within +/- 14 days of warfarin initiation (ambulatory care only)                         | 4,566 (2.1%)     | 17,000 (7.7%)    | 6,556 (2.9%)        | 33,131 (8.7%)  | 5,247 (1.6%)       | 28,387 (8.2%)  | 7,830 (1.7%)        | 38,859 (8.2%)  | 46,679 (10.0%)   | 24,289 (1.8%)  | 119,739 (8.6%)           | 143,279 (10.4%)    |
| plus evidence of PTC within +/- 14 days of warfarin initiation (ambulatory care only)                         | 4,566 (2.1%)     | 17,000 (7.7%)    | 6,556 (2.9%)        | 33,131 (8.7%)  | 5,247 (1.6%)       | 28,387 (8.2%)  | 7,830 (1.7%)        | 38,859 (8.2%)  | 46,679 (10.0%)   | 24,289 (1.8%)  | 119,739 (8.6%)           | 143,279 (10.4%)    |
| plus evidence of PTC within +/- 14 days of warfarin initiation (ambulatory care only)                         | 4,566 (2.1%)     | 17,000 (7.7%)    | 6,556 (2.9%)        | 33,131 (8.7%)  | 5,247 (1.6%)       | 28,387 (8.2%)  | 7,830 (1.7%)        | 38,859 (8.2%)  | 46,679 (10.0%)   | 24,289 (1.8%)  | 119,739 (8.6%)           | 143,279 (10.4%)    |
| plus evidence of PTC within +/- 14 days of warfarin initiation (ambulatory care only)                         | 4,566 (2.1%)     | 17,000 (7.7%)    | 6,556 (2.9%)        | 33,131 (8.7%)  | 5,247 (1.6%)       | 28,387 (8.2%)  | 7,830 (1.7%)        | 38,859 (8.2%)  | 46,679 (10.0%)   | 24,289 (1.8%)  | 119,739 (8.6%)           | 143,279 (10.4%)    |
| plus evidence of PTC within +/- 14 days of warfarin initiation (ambulatory care only)                         | 4,566 (2.1%)     | 17,000 (7.7%)    | 6,556 (2.9%)        | 33,131 (8.7%)  | 5,247 (1.6%)       | 28,387 (8.2%)  | 7,830 (1.7%)        | 38,859 (8.2%)  | 46,679 (10.0%)   | 24,289 (1.8%)  | 119,739 (8.6%)           | 143,279 (10.4%)    |
| plus evidence of PTC within +/- 14 days of warfarin initiation (ambulatory care only)                         | 4,566 (2.1%)     | 17,000 (7.7%)    | 6,556 (2.9%)        | 33,131 (8.7%)  | 5,247 (1.6%)       | 28,387 (8.2%)  | 7,830 (1.7%)        | 38,859 (8.2%)  | 46,679 (10.0%)   | 24,289 (1.8%)  | 119,739 (8.6%)           | 143,279 (10.4%)    |
| plus evidence of PTC within +/- 14 days of warfarin initiation (ambulatory care only)                         | 4,566 (2.1%)     | 17,000 (7.7%)    | 6,556 (2.9%)        | 33,131 (8.7%)  | 5,247 (1.6%)       | 28,387 (8.2%)  | 7,830 (1.7%)        | 38,859 (8.2%)  | 46,679 (10.0%)   | 24,289 (1.8%)  | 119,739 (8.6%)           | 143,279 (10.4%)    |
| plus evidence of PTC within +/- 14 days of warfarin initiation (ambulatory care only)                         | 4,566 (2.1%)     | 17,000 (7.7%)    | 6,556 (2.9%)        | 33,131 (8.7%)  | 5,247 (1.6%)       | 28,387 (8.2%)  | 7,830 (1.7%)        | 38,859 (8.2%)  | 46,679 (10.0%)   | 24,289 (1.8%)  | 119,739 (8.6%)           | 143,279 (10.4%)    |
| plus evidence of PTC within +/- 14 days of warfarin initiation (ambulatory care only)                         | 4,566 (2.1%)     | 17,000 (7.7%)    | 6,556 (2.9%)        | 33,131 (8.7%)  | 5,247 (1.6%)       | 28,387 (8.2%)  | 7,830 (1.7%)        | 38,859 (8.2%)  | 46,679 (10.0%)   | 24,289 (1.8%)  | 119,739 (8.6%)           | 143,279 (10.4%)    |
| plus evidence of PTC within +/- 14 days of warfarin initiation (ambulatory care only)                         | 4,566 (2.1%)     | 17,000 (7.7%)    | 6,556 (2.9%)        | 33,131 (8.7%)  | 5,247 (1.6%)       | 28,387 (8.2%)  | 7,830 (1.7%)        | 38,859 (8.2%)  | 46,679 (10.0%)   | 24,289 (1.8%)  | 119,739 (8.6%)           | 143,279 (10.4%)    |
| plus evidence of PTC within +/- 14 days of warfarin initiation (ambulatory care only)                         | 4,566 (2.1%)     | 17,000 (7.7%)    | 6,556 (2.9%)        | 33,131 (8.7%)  | 5,247 (1.6%)       | 28,387 (8.2%)  | 7,830 (1.7%)        | 38,859 (8.2%)  | 46,679 (10.0%)   | 24,289 (1.8%)  | 119,739 (8.6%)           | 143,279 (10.4%)    |
| plus evidence of PTC within +/- 14 days of warfarin initiation (ambulatory care only)                         | 4,566 (2.1%)     | 17,000 (7.7%)    | 6,556 (2.9%)        | 33,131 (8.7%)  | 5,247 (1.6%)       | 28,387 (8.2%)  | 7,830 (1.7%)        | 38,859 (8.2%)  | 46,679 (10.0%)   | 24,289 (1.8%)  | 119,739 (8.6%)           | 143,279 (10.4%)    |
| plus evidence of PTC within +/- 14 days of warfarin initiation (ambulatory care only)                         | 4,566 (2.1%)     | 17,000 (7.7%)    | 6,556 (2.9%)        | 33,131 (8.7%)  | 5,247 (1.6%)       | 28,387 (8.2%)  | 7,830 (1.7%)        | 38,859 (8.2%)  | 46,679 (10.0%)   | 24,289 (1.8%)  | 119,739 (8.6%)           | 143,279 (10.4%)    |
| plus evidence of PTC within +/- 14 days of warfarin initiation (ambulatory care only)                         | 4,566 (2.1%)     | 17,000 (7.7%)    | 6,556 (2.9%)        | 33,131 (8.7%)  | 5,247 (1.6%)       | 28,387 (8.2%)  | 7,830 (1.7%)        | 38,859 (8.2%)  | 46,679 (10.0%)   | 24,289 (1.8%)  | 119,739 (8.6%)           | 143,279 (10.4%)    |
| plus evidence of PTC within +/- 14 days of warfarin initiation (ambulatory care only)                         | 4,566 (2.1%)     | 17,000 (7.7%)    | 6,556 (2.9%)        | 33,131 (8.7%)  | 5,247 (1.6%)       | 28,387 (8.2%)  | 7,830 (1.7%)        | 38,859 (8.2%)  | 46,679 (10.0%)   | 24,289 (1.8%)  | 119,739 (8.6%)           | 143,279 (10.4%)    |
| plus evidence of PTC within +/- 14 days of warfarin initiation (ambulatory care only)                         | 4,566 (2.1%)     | 17,000 (7.7%)    | 6,556 (2.9%)        | 33,131 (8.7%)  | 5,247 (1.6%)       | 28,387 (8.2%)  | 7,830 (1.7%)        | 38,859 (8.2%)  | 46,679 (10.0%)   | 24,289 (1.8%)  | 119,739 (8.6%)           | 143,279 (10.4%)    |
| plus evidence of PTC within +/- 14 days of warfarin initiation (ambulatory care only)                         | 4,566 (2.1%)     | 17,000 (7.7%)    | 6,556 (2.9%)        | 33,131 (8.7%)  | 5,247 (1.6%)       | 28,387 (8.2%)  | 7,830 (1.7%)        | 38,859 (8.2%)  | 46,679 (10.0%)   | 24,289 (1.8%)  | 119,739 (8.6%)           | 143,279 (10.4%)    |
| plus evidence of PTC within +/- 14 days of warfarin initiation (ambulatory care only)                         | 4,566 (2.1%)     | 17,000 (7.7%)    | 6,556 (2.9%)        | 33,131 (8.7%)  | 5,247 (1.6%)       | 28,387 (8.2%)  | 7,830 (1.7%)        | 38,859 (8.2%)  | 46,679 (10.0%)   | 24,289 (1.8%)  | 119,739 (8.6%)           | 143,279 (10.4%)    |
| plus evidence of PTC within +/- 14 days of warfarin initiation (ambulatory care only)                         | 4,566 (2.1%)     | 17,000 (7.7%)    | 6,556 (2.9%)        | 33,131 (8.7%)  | 5,247 (1.6%)       | 28,387 (8.2%)  | 7,830 (1.7%)        | 38,859 (8.2%)  | 46,679 (10.0%)   | 24,289 (1.8%)  | 119,739 (8.6%)           | 143,279 (10.4%)    |
| plus evidence of PTC within +/- 14 days of warfarin initiation (ambulatory care only)                         | 4,566 (2.1%)     | 17,000 (7.7%)    | 6,556 (2.9%)        | 33,131 (8.7%)  | 5,247 (1.6%)       |                |                     |                |                  |                |                          |                    |

Online Supplement – Table 2. Characteristics of matched patients receiving apixaban or warfarin as outpatient therapy for VTE

| Qualifying VTE Encounter, n (%)                 | Humana                |                       | Aetna                 |                       | Munich                |                       | Aetna                 |                       | Optum                 |                       | Aetna                 |                       | Pharmetrics            |                        | Total Population       |                        |                                            |               |               |               |               |               |               |               |               |               |               |               |               |               |               |               |               |                      |               |               |               |               |               |               |               |               |               |               |               |               |               |               |               |               |                                           |               |               |               |               |               |               |               |               |               |               |               |               |               |               |               |               |                             |               |               |               |               |               |               |               |               |               |               |               |               |               |               |               |               |                            |             |             |               |               |               |               |               |               |               |               |               |               |               |               |               |               |                                      |               |               |               |               |               |               |               |               |               |               |               |               |                |                |                |                |                                              |               |               |               |               |               |               |               |               |               |               |               |               |               |               |               |               |                                            |               |               |               |               |               |               |               |               |               |               |               |               |               |               |               |               |                                              |               |               |               |               |               |               |               |               |               |               |               |               |                |                |                |                |                                           |               |               |               |               |               |               |               |               |               |               |               |               |               |               |               |               |                          |               |               |               |               |               |               |               |               |               |               |               |               |               |               |               |               |                                            |             |             |               |               |               |               |               |               |               |               |               |               |               |               |               |               |                             |               |               |               |               |               |               |               |               |               |               |               |               |               |               |               |               |                                           |               |               |               |               |               |               |               |               |               |               |               |               |               |               |               |               |                                      |               |               |               |               |               |               |               |               |               |               |               |               |               |               |               |               |                                              |               |               |               |               |               |               |               |               |               |               |               |               |               |               |               |               |                                             |               |               |               |               |               |               |               |               |               |               |               |               |               |               |               |               |                                            |               |               |               |               |               |               |               |               |               |               |               |               |               |               |               |               |                                                 |             |             |             |             |             |             |             |             |            |            |            |            |              |              |              |              |                                              |               |               |               |               |               |               |               |               |               |               |               |               |               |               |               |               |                                                 |               |               |               |               |               |               |               |               |               |               |               |               |               |               |               |               |                          |               |               |               |               |               |               |               |               |               |               |               |               |               |               |               |               |                                           |               |               |               |               |               |               |               |               |               |               |               |               |               |               |               |               |                          |               |               |               |               |               |               |               |               |               |               |               |               |               |               |               |               |                                      |               |               |               |               |               |               |               |               |               |               |               |               |               |               |               |               |                                              |               |               |               |               |               |               |               |               |               |               |               |               |               |               |               |               |                                           |            |            |             |             |             |             |             |             |             |             |             |             |               |               |               |               |                                                 |               |               |               |               |               |               |               |               |               |               |               |               |               |               |               |               |                                              |               |               |               |               |               |               |               |               |               |               |               |               |               |               |               |               |                                             |               |               |             |             |             |             |             |             |               |               |               |               |               |               |               |               |                                            |               |               |               |               |               |               |               |               |             |             |               |               |               |               |               |               |                                                 |             |             |             |             |             |             |             |             |             |             |             |             |               |               |               |               |                                           |               |               |             |             |             |             |             |             |               |               |               |               |               |               |               |               |                          |               |               |               |               |               |               |               |               |               |               |               |               |               |               |               |               |                                      |               |               |               |               |               |               |               |               |               |               |               |               |               |               |               |               |                                              |             |             |             |             |             |             |             |             |             |             |            |            |               |               |               |               |                          |               |               |               |               |               |               |               |               |               |               |               |               |               |               |               |               |                                                 |               |               |               |               |               |               |               |               |               |               |               |               |               |               |               |               |                                              |             |             |             |             |             |             |             |             |             |             |               |               |               |               |               |               |                      |               |               |             |             |             |             |             |             |               |               |               |               |               |               |               |               |                                                 |               |               |               |               |               |               |               |               |             |             |               |               |               |               |               |               |                                        |             |             |             |             |             |             |             |             |             |             |               |               |               |               |               |               |                                           |               |               |             |             |             |             |             |             |               |               |               |               |               |               |               |               |                          |               |               |               |               |               |               |               |               |               |               |               |               |               |               |               |               |              |               |               |               |               |               |               |               |               |               |               |               |               |               |               |               |               |                                             |           |           |            |            |            |            |            |            |           |           |           |           |            |            |            |            |                          |               |               |               |               |               |               |               |               |               |               |               |               |               |               |               |               |                                                 |               |               |               |               |               |               |               |               |               |               |               |               |               |               |               |               |                                             |             |             |             |             |             |             |             |             |             |             |               |               |               |               |               |               |                      |            |            |            |            |            |            |            |            |            |            |            |            |            |              |              |              |                                                 |           |           |           |           |           |           |           |           |           |           |            |            |            |            |            |            |         |             |             |             |             |             |             |             |             |             |             |               |               |               |               |               |               |                      |           |           |           |           |           |           |           |           |           |           |           |           |            |            |            |  |
|-------------------------------------------------|-----------------------|-----------------------|-----------------------|-----------------------|-----------------------|-----------------------|-----------------------|-----------------------|-----------------------|-----------------------|-----------------------|-----------------------|------------------------|------------------------|------------------------|------------------------|--------------------------------------------|---------------|---------------|---------------|---------------|---------------|---------------|---------------|---------------|---------------|---------------|---------------|---------------|---------------|---------------|---------------|---------------|----------------------|---------------|---------------|---------------|---------------|---------------|---------------|---------------|---------------|---------------|---------------|---------------|---------------|---------------|---------------|---------------|---------------|-------------------------------------------|---------------|---------------|---------------|---------------|---------------|---------------|---------------|---------------|---------------|---------------|---------------|---------------|---------------|---------------|---------------|---------------|-----------------------------|---------------|---------------|---------------|---------------|---------------|---------------|---------------|---------------|---------------|---------------|---------------|---------------|---------------|---------------|---------------|---------------|----------------------------|-------------|-------------|---------------|---------------|---------------|---------------|---------------|---------------|---------------|---------------|---------------|---------------|---------------|---------------|---------------|---------------|--------------------------------------|---------------|---------------|---------------|---------------|---------------|---------------|---------------|---------------|---------------|---------------|---------------|---------------|----------------|----------------|----------------|----------------|----------------------------------------------|---------------|---------------|---------------|---------------|---------------|---------------|---------------|---------------|---------------|---------------|---------------|---------------|---------------|---------------|---------------|---------------|--------------------------------------------|---------------|---------------|---------------|---------------|---------------|---------------|---------------|---------------|---------------|---------------|---------------|---------------|---------------|---------------|---------------|---------------|----------------------------------------------|---------------|---------------|---------------|---------------|---------------|---------------|---------------|---------------|---------------|---------------|---------------|---------------|----------------|----------------|----------------|----------------|-------------------------------------------|---------------|---------------|---------------|---------------|---------------|---------------|---------------|---------------|---------------|---------------|---------------|---------------|---------------|---------------|---------------|---------------|--------------------------|---------------|---------------|---------------|---------------|---------------|---------------|---------------|---------------|---------------|---------------|---------------|---------------|---------------|---------------|---------------|---------------|--------------------------------------------|-------------|-------------|---------------|---------------|---------------|---------------|---------------|---------------|---------------|---------------|---------------|---------------|---------------|---------------|---------------|---------------|-----------------------------|---------------|---------------|---------------|---------------|---------------|---------------|---------------|---------------|---------------|---------------|---------------|---------------|---------------|---------------|---------------|---------------|-------------------------------------------|---------------|---------------|---------------|---------------|---------------|---------------|---------------|---------------|---------------|---------------|---------------|---------------|---------------|---------------|---------------|---------------|--------------------------------------|---------------|---------------|---------------|---------------|---------------|---------------|---------------|---------------|---------------|---------------|---------------|---------------|---------------|---------------|---------------|---------------|----------------------------------------------|---------------|---------------|---------------|---------------|---------------|---------------|---------------|---------------|---------------|---------------|---------------|---------------|---------------|---------------|---------------|---------------|---------------------------------------------|---------------|---------------|---------------|---------------|---------------|---------------|---------------|---------------|---------------|---------------|---------------|---------------|---------------|---------------|---------------|---------------|--------------------------------------------|---------------|---------------|---------------|---------------|---------------|---------------|---------------|---------------|---------------|---------------|---------------|---------------|---------------|---------------|---------------|---------------|-------------------------------------------------|-------------|-------------|-------------|-------------|-------------|-------------|-------------|-------------|------------|------------|------------|------------|--------------|--------------|--------------|--------------|----------------------------------------------|---------------|---------------|---------------|---------------|---------------|---------------|---------------|---------------|---------------|---------------|---------------|---------------|---------------|---------------|---------------|---------------|-------------------------------------------------|---------------|---------------|---------------|---------------|---------------|---------------|---------------|---------------|---------------|---------------|---------------|---------------|---------------|---------------|---------------|---------------|--------------------------|---------------|---------------|---------------|---------------|---------------|---------------|---------------|---------------|---------------|---------------|---------------|---------------|---------------|---------------|---------------|---------------|-------------------------------------------|---------------|---------------|---------------|---------------|---------------|---------------|---------------|---------------|---------------|---------------|---------------|---------------|---------------|---------------|---------------|---------------|--------------------------|---------------|---------------|---------------|---------------|---------------|---------------|---------------|---------------|---------------|---------------|---------------|---------------|---------------|---------------|---------------|---------------|--------------------------------------|---------------|---------------|---------------|---------------|---------------|---------------|---------------|---------------|---------------|---------------|---------------|---------------|---------------|---------------|---------------|---------------|----------------------------------------------|---------------|---------------|---------------|---------------|---------------|---------------|---------------|---------------|---------------|---------------|---------------|---------------|---------------|---------------|---------------|---------------|-------------------------------------------|------------|------------|-------------|-------------|-------------|-------------|-------------|-------------|-------------|-------------|-------------|-------------|---------------|---------------|---------------|---------------|-------------------------------------------------|---------------|---------------|---------------|---------------|---------------|---------------|---------------|---------------|---------------|---------------|---------------|---------------|---------------|---------------|---------------|---------------|----------------------------------------------|---------------|---------------|---------------|---------------|---------------|---------------|---------------|---------------|---------------|---------------|---------------|---------------|---------------|---------------|---------------|---------------|---------------------------------------------|---------------|---------------|-------------|-------------|-------------|-------------|-------------|-------------|---------------|---------------|---------------|---------------|---------------|---------------|---------------|---------------|--------------------------------------------|---------------|---------------|---------------|---------------|---------------|---------------|---------------|---------------|-------------|-------------|---------------|---------------|---------------|---------------|---------------|---------------|-------------------------------------------------|-------------|-------------|-------------|-------------|-------------|-------------|-------------|-------------|-------------|-------------|-------------|-------------|---------------|---------------|---------------|---------------|-------------------------------------------|---------------|---------------|-------------|-------------|-------------|-------------|-------------|-------------|---------------|---------------|---------------|---------------|---------------|---------------|---------------|---------------|--------------------------|---------------|---------------|---------------|---------------|---------------|---------------|---------------|---------------|---------------|---------------|---------------|---------------|---------------|---------------|---------------|---------------|--------------------------------------|---------------|---------------|---------------|---------------|---------------|---------------|---------------|---------------|---------------|---------------|---------------|---------------|---------------|---------------|---------------|---------------|----------------------------------------------|-------------|-------------|-------------|-------------|-------------|-------------|-------------|-------------|-------------|-------------|------------|------------|---------------|---------------|---------------|---------------|--------------------------|---------------|---------------|---------------|---------------|---------------|---------------|---------------|---------------|---------------|---------------|---------------|---------------|---------------|---------------|---------------|---------------|-------------------------------------------------|---------------|---------------|---------------|---------------|---------------|---------------|---------------|---------------|---------------|---------------|---------------|---------------|---------------|---------------|---------------|---------------|----------------------------------------------|-------------|-------------|-------------|-------------|-------------|-------------|-------------|-------------|-------------|-------------|---------------|---------------|---------------|---------------|---------------|---------------|----------------------|---------------|---------------|-------------|-------------|-------------|-------------|-------------|-------------|---------------|---------------|---------------|---------------|---------------|---------------|---------------|---------------|-------------------------------------------------|---------------|---------------|---------------|---------------|---------------|---------------|---------------|---------------|-------------|-------------|---------------|---------------|---------------|---------------|---------------|---------------|----------------------------------------|-------------|-------------|-------------|-------------|-------------|-------------|-------------|-------------|-------------|-------------|---------------|---------------|---------------|---------------|---------------|---------------|-------------------------------------------|---------------|---------------|-------------|-------------|-------------|-------------|-------------|-------------|---------------|---------------|---------------|---------------|---------------|---------------|---------------|---------------|--------------------------|---------------|---------------|---------------|---------------|---------------|---------------|---------------|---------------|---------------|---------------|---------------|---------------|---------------|---------------|---------------|---------------|--------------|---------------|---------------|---------------|---------------|---------------|---------------|---------------|---------------|---------------|---------------|---------------|---------------|---------------|---------------|---------------|---------------|---------------------------------------------|-----------|-----------|------------|------------|------------|------------|------------|------------|-----------|-----------|-----------|-----------|------------|------------|------------|------------|--------------------------|---------------|---------------|---------------|---------------|---------------|---------------|---------------|---------------|---------------|---------------|---------------|---------------|---------------|---------------|---------------|---------------|-------------------------------------------------|---------------|---------------|---------------|---------------|---------------|---------------|---------------|---------------|---------------|---------------|---------------|---------------|---------------|---------------|---------------|---------------|---------------------------------------------|-------------|-------------|-------------|-------------|-------------|-------------|-------------|-------------|-------------|-------------|---------------|---------------|---------------|---------------|---------------|---------------|----------------------|------------|------------|------------|------------|------------|------------|------------|------------|------------|------------|------------|------------|------------|--------------|--------------|--------------|-------------------------------------------------|-----------|-----------|-----------|-----------|-----------|-----------|-----------|-----------|-----------|-----------|------------|------------|------------|------------|------------|------------|---------|-------------|-------------|-------------|-------------|-------------|-------------|-------------|-------------|-------------|-------------|---------------|---------------|---------------|---------------|---------------|---------------|----------------------|-----------|-----------|-----------|-----------|-----------|-----------|-----------|-----------|-----------|-----------|-----------|-----------|------------|------------|------------|--|
|                                                 | Apixaban<br>(n=3,118) | Warfarin<br>(n=3,118) | Apixaban<br>(n=4,358) | Warfarin<br>(n=4,358) | Apixaban<br>(n=4,358) | Warfarin<br>(n=4,358) | Apixaban<br>(n=4,358) | Warfarin<br>(n=4,358) | Apixaban<br>(n=5,951) | Warfarin<br>(n=5,951) | Apixaban<br>(n=5,951) | Warfarin<br>(n=5,951) | Apixaban<br>(n=17,878) | Warfarin<br>(n=17,878) | Apixaban<br>(n=17,878) | Warfarin<br>(n=17,878) |                                            |               |               |               |               |               |               |               |               |               |               |               |               |               |               |               |               |                      |               |               |               |               |               |               |               |               |               |               |               |               |               |               |               |               |                                           |               |               |               |               |               |               |               |               |               |               |               |               |               |               |               |               |                             |               |               |               |               |               |               |               |               |               |               |               |               |               |               |               |               |                            |             |             |               |               |               |               |               |               |               |               |               |               |               |               |               |               |                                      |               |               |               |               |               |               |               |               |               |               |               |               |                |                |                |                |                                              |               |               |               |               |               |               |               |               |               |               |               |               |               |               |               |               |                                            |               |               |               |               |               |               |               |               |               |               |               |               |               |               |               |               |                                              |               |               |               |               |               |               |               |               |               |               |               |               |                |                |                |                |                                           |               |               |               |               |               |               |               |               |               |               |               |               |               |               |               |               |                          |               |               |               |               |               |               |               |               |               |               |               |               |               |               |               |               |                                            |             |             |               |               |               |               |               |               |               |               |               |               |               |               |               |               |                             |               |               |               |               |               |               |               |               |               |               |               |               |               |               |               |               |                                           |               |               |               |               |               |               |               |               |               |               |               |               |               |               |               |               |                                      |               |               |               |               |               |               |               |               |               |               |               |               |               |               |               |               |                                              |               |               |               |               |               |               |               |               |               |               |               |               |               |               |               |               |                                             |               |               |               |               |               |               |               |               |               |               |               |               |               |               |               |               |                                            |               |               |               |               |               |               |               |               |               |               |               |               |               |               |               |               |                                                 |             |             |             |             |             |             |             |             |            |            |            |            |              |              |              |              |                                              |               |               |               |               |               |               |               |               |               |               |               |               |               |               |               |               |                                                 |               |               |               |               |               |               |               |               |               |               |               |               |               |               |               |               |                          |               |               |               |               |               |               |               |               |               |               |               |               |               |               |               |               |                                           |               |               |               |               |               |               |               |               |               |               |               |               |               |               |               |               |                          |               |               |               |               |               |               |               |               |               |               |               |               |               |               |               |               |                                      |               |               |               |               |               |               |               |               |               |               |               |               |               |               |               |               |                                              |               |               |               |               |               |               |               |               |               |               |               |               |               |               |               |               |                                           |            |            |             |             |             |             |             |             |             |             |             |             |               |               |               |               |                                                 |               |               |               |               |               |               |               |               |               |               |               |               |               |               |               |               |                                              |               |               |               |               |               |               |               |               |               |               |               |               |               |               |               |               |                                             |               |               |             |             |             |             |             |             |               |               |               |               |               |               |               |               |                                            |               |               |               |               |               |               |               |               |             |             |               |               |               |               |               |               |                                                 |             |             |             |             |             |             |             |             |             |             |             |             |               |               |               |               |                                           |               |               |             |             |             |             |             |             |               |               |               |               |               |               |               |               |                          |               |               |               |               |               |               |               |               |               |               |               |               |               |               |               |               |                                      |               |               |               |               |               |               |               |               |               |               |               |               |               |               |               |               |                                              |             |             |             |             |             |             |             |             |             |             |            |            |               |               |               |               |                          |               |               |               |               |               |               |               |               |               |               |               |               |               |               |               |               |                                                 |               |               |               |               |               |               |               |               |               |               |               |               |               |               |               |               |                                              |             |             |             |             |             |             |             |             |             |             |               |               |               |               |               |               |                      |               |               |             |             |             |             |             |             |               |               |               |               |               |               |               |               |                                                 |               |               |               |               |               |               |               |               |             |             |               |               |               |               |               |               |                                        |             |             |             |             |             |             |             |             |             |             |               |               |               |               |               |               |                                           |               |               |             |             |             |             |             |             |               |               |               |               |               |               |               |               |                          |               |               |               |               |               |               |               |               |               |               |               |               |               |               |               |               |              |               |               |               |               |               |               |               |               |               |               |               |               |               |               |               |               |                                             |           |           |            |            |            |            |            |            |           |           |           |           |            |            |            |            |                          |               |               |               |               |               |               |               |               |               |               |               |               |               |               |               |               |                                                 |               |               |               |               |               |               |               |               |               |               |               |               |               |               |               |               |                                             |             |             |             |             |             |             |             |             |             |             |               |               |               |               |               |               |                      |            |            |            |            |            |            |            |            |            |            |            |            |            |              |              |              |                                                 |           |           |           |           |           |           |           |           |           |           |            |            |            |            |            |            |         |             |             |             |             |             |             |             |             |             |             |               |               |               |               |               |               |                      |           |           |           |           |           |           |           |           |           |           |           |           |            |            |            |  |
| Setting:                                        |                       |                       |                       |                       |                       |                       |                       |                       |                       |                       |                       |                       |                        |                        |                        |                        | Acute-care inpatient                       | 2,097 (63.2%) | 2,097 (63.2%) | 2,597 (59.6%) | 2,597 (59.6%) | 2,597 (59.6%) | 2,597 (59.6%) | 2,597 (59.6%) | 2,597 (59.6%) | 2,334 (55.0%) | 2,334 (55.0%) | 2,655 (44.5%) | 2,655 (44.5%) | 9,683 (54.2%) | 9,683 (54.2%) | 9,683 (54.2%) | 9,683 (54.2%) | Ambulatory care      | 1,221 (38.6%) | 1,221 (38.6%) | 1,759 (40.4%) | 1,759 (40.4%) | 1,759 (40.4%) | 1,759 (40.4%) | 1,759 (40.4%) | 1,759 (40.4%) | 1,909 (45.0%) | 1,909 (45.0%) | 3,300 (55.5%) | 3,300 (55.5%) | 8,195 (45.8%) | 8,195 (45.8%) | 8,195 (45.8%) | 8,195 (45.8%) | Diagnosis:                                |               |               |               |               |               |               |               |               |               |               |               |               |               |               |               |               | PE (with or without DVT)    | 1,376 (41.5%) | 1,376 (41.5%) | 1,954 (44.9%) | 1,954 (44.9%) | 1,954 (44.9%) | 1,954 (44.9%) | 1,954 (44.9%) | 1,954 (44.9%) | 2,120 (50.1%) | 2,120 (50.1%) | 2,210 (37.1%) | 2,210 (37.1%) | 7,322 (41.0%) | 7,322 (41.0%) | 7,322 (41.0%) | 7,322 (41.0%) | PE with DVT                | 765 (23.9%) | 765 (23.9%) | 1,054 (24.2%) | 1,054 (24.2%) | 1,054 (24.2%) | 1,054 (24.2%) | 1,054 (24.2%) | 1,054 (24.2%) | 1,154 (26.5%) | 1,154 (26.5%) | 1,210 (20.7%) | 1,210 (20.7%) | 4,165 (23.3%) | 4,165 (23.3%) | 4,165 (23.3%) | 4,165 (23.3%) | PE without DVT                       | 611 (19.1%)   | 611 (19.1%)   | 900 (20.7%)   | 900 (20.7%)   | 900 (20.7%)   | 900 (20.7%)   | 900 (20.7%)   | 900 (20.7%)   | 966 (22.5%)   | 966 (22.5%)   | 1,000 (16.4%) | 1,000 (16.4%) | 3,157 (17.7%)  | 3,157 (17.7%)  | 3,157 (17.7%)  | 3,157 (17.7%)  | DVT only                                     | 1,342 (42.3%) | 1,342 (42.3%) | 1,944 (45.0%) | 1,944 (45.0%) | 1,944 (45.0%) | 1,944 (45.0%) | 1,944 (45.0%) | 1,944 (45.0%) | 2,044 (47.0%) | 2,044 (47.0%) | 2,000 (33.8%) | 2,000 (33.8%) | 7,015 (39.1%) | 7,015 (39.1%) | 7,015 (39.1%) | 7,015 (39.1%) | Prevented atherothrombosis                 | 798 (24.1%)   | 798 (24.1%)   | 1,010 (23.2%) | 1,010 (23.2%) | 1,010 (23.2%) | 1,010 (23.2%) | 1,010 (23.2%) | 1,010 (23.2%) | 892 (21.0%)   | 892 (21.0%)   | 1,369 (23.0%) | 1,369 (23.0%) | 4,969 (27.8%) | 4,969 (27.8%) | 4,969 (27.8%) | 4,969 (27.8%) | Prevented thromboembolism                    | 2,520 (75.9%) | 2,520 (75.9%) | 3,348 (76.8%) | 3,348 (76.8%) | 3,348 (76.8%) | 3,348 (76.8%) | 3,348 (76.8%) | 3,348 (76.8%) | 3,551 (79.0%) | 3,551 (79.0%) | 4,592 (77.0%) | 4,592 (77.0%) | 13,809 (77.2%) | 13,809 (77.2%) | 13,809 (77.2%) | 13,809 (77.2%) | Age, n (%)                                |               |               |               |               |               |               |               |               |               |               |               |               |               |               |               |               | Mean (SD)                | 71.5 (13.3)   | 71.5 (13.3)   | 57.8 (15.8)   | 57.8 (15.8)   | 57.8 (15.8)   | 57.8 (15.8)   | 57.8 (15.8)   | 57.8 (15.8)   | 65.2 (15.5)   | 65.2 (15.5)   | 51.4 (12.1)   | 51.4 (12.1)   | 60.0 (16.0)   | 60.0 (16.0)   | 60.0 (16.0)   | 60.0 (16.0)   | Median                                     | 72          | 72          | 57            | 57            | 57            | 57            | 57            | 57            | 67            | 67            | 53            | 53            | 60            | 60            | 60            | 60            | Age (years), n (%)          |               |               |               |               |               |               |               |               |               |               |               |               |               |               |               |               | 18-49 years                               | 186 (5.6%)    | 186 (5.6%)    | 1,221 (28.1%) | 1,221 (28.1%) | 1,221 (28.1%) | 1,221 (28.1%) | 1,221 (28.1%) | 1,221 (28.1%) | 732 (17.3%)   | 732 (17.3%)   | 2,389 (38.4%) | 2,389 (38.4%) | 4,428 (24.8%) | 4,428 (24.8%) | 4,428 (24.8%) | 4,428 (24.8%) | 50-64 years                          | 663 (20.0%)   | 663 (20.0%)   | 1,902 (43.7%) | 1,902 (43.7%) | 1,902 (43.7%) | 1,902 (43.7%) | 1,902 (43.7%) | 1,902 (43.7%) | 1,169 (27.6%) | 1,169 (27.6%) | 3,140 (52.7%) | 3,140 (52.7%) | 6,874 (38.7%) | 6,874 (38.7%) | 6,874 (38.7%) | 6,874 (38.7%) | 65-74 years                                  | 1,162 (35.0%) | 1,162 (35.0%) | 510 (11.7%)   | 510 (11.7%)   | 510 (11.7%)   | 510 (11.7%)   | 510 (11.7%)   | 510 (11.7%)   | 1,059 (25.0%) | 1,059 (25.0%) | 411 (6.9%)    | 411 (6.9%)    | 3,142 (17.6%) | 3,142 (17.6%) | 3,142 (17.6%) | 3,142 (17.6%) | ≥75 years                                   | 1,307 (39.4%) | 1,307 (39.4%) | 719 (16.5%)   | 719 (16.5%)   | 719 (16.5%)   | 719 (16.5%)   | 719 (16.5%)   | 719 (16.5%)   | 1,283 (30.2%) | 1,283 (30.2%) | 121 (2.0%)    | 121 (2.0%)    | 3,430 (19.2%) | 3,430 (19.2%) | 3,430 (19.2%) | 3,430 (19.2%) | Missing                                    | —             | —             | —             | —             | —             | —             | —             | —             | —             | —             | —             | —             | —             | —             | —             | —             | Sex, n (%)                                      |             |             |             |             |             |             |             |             |            |            |            |            |              |              |              |              | Male                                         | 1,417 (42.7%) | 1,417 (42.7%) | 2,327 (53.4%) | 2,327 (53.4%) | 2,327 (53.4%) | 2,327 (53.4%) | 2,327 (53.4%) | 2,327 (53.4%) | 2,046 (48.7%) | 2,046 (48.7%) | 3,461 (58.1%) | 3,461 (58.1%) | 9,279 (51.9%) | 9,279 (51.9%) | 9,279 (51.9%) | 9,279 (51.9%) | Female                                          | 1,901 (57.3%) | 1,901 (57.3%) | 2,029 (46.6%) | 2,029 (46.6%) | 2,029 (46.6%) | 2,029 (46.6%) | 2,029 (46.6%) | 2,029 (46.6%) | 2,199 (51.3%) | 2,199 (51.3%) | 2,499 (41.9%) | 2,499 (41.9%) | 8,599 (48.1%) | 8,599 (48.1%) | 8,599 (48.1%) | 8,599 (48.1%) | Missing                  | —             | —             | —             | —             | —             | —             | —             | —             | —             | —             | —             | —             | —             | —             | —             | —             | US Geographic Region, n (%)               |               |               |               |               |               |               |               |               |               |               |               |               |               |               |               |               | East                     | 72 (2.2%)     | 72 (2.2%)     | 724 (16.6%)   | 724 (16.6%)   | 724 (16.6%)   | 724 (16.6%)   | 724 (16.6%)   | 724 (16.6%)   | 402 (9.5%)    | 402 (9.5%)    | 1,080 (18.1%) | 1,080 (18.1%) | 2,278 (12.7%) | 2,278 (12.7%) | 2,278 (12.7%) | 2,278 (12.7%) | Midwest                              | 693 (22.2%)   | 693 (22.2%)   | 2,097 (48.2%) | 2,097 (48.2%) | 2,097 (48.2%) | 2,097 (48.2%) | 2,097 (48.2%) | 2,097 (48.2%) | 1,175 (27.3%) | 1,175 (27.3%) | 1,491 (25.9%) | 1,491 (25.9%) | 5,347 (30.0%) | 5,347 (30.0%) | 5,347 (30.0%) | 5,347 (30.0%) | South                                        | 2,065 (66.0%) | 2,065 (66.0%) | 2,065 (47.5%) | 2,065 (47.5%) | 2,065 (47.5%) | 2,065 (47.5%) | 2,065 (47.5%) | 2,065 (47.5%) | 1,856 (42.8%) | 1,856 (42.8%) | 2,126 (36.5%) | 2,126 (36.5%) | 7,372 (41.3%) | 7,372 (41.3%) | 7,372 (41.3%) | 7,372 (41.3%) | West                                      | 265 (8.0%) | 265 (8.0%) | 480 (11.0%) | 480 (11.0%) | 480 (11.0%) | 480 (11.0%) | 480 (11.0%) | 480 (11.0%) | 856 (20.2%) | 856 (20.2%) | 588 (10.3%) | 588 (10.3%) | 2,189 (12.2%) | 2,189 (12.2%) | 2,189 (12.2%) | 2,189 (12.2%) | Other                                           | —             | —             | 15 (0.3%)     | 15 (0.3%)     | 15 (0.3%)     | 15 (0.3%)     | 15 (0.3%)     | 15 (0.3%)     | —             | —             | —             | —             | 15 (0.1%)     | 15 (0.1%)     | 15 (0.1%)     | 15 (0.1%)     | Missing                                      | —             | —             | —             | —             | —             | —             | —             | —             | —             | —             | —             | —             | —             | —             | —             | —             | Comorbidity Profile                         |               |               |             |             |             |             |             |             |               |               |               |               |               |               |               |               | Deyo-Charlson Comorbidity Index, mean (SD) | 2.0 (2.1)     | 2.1 (2.1)     | 0.7 (1.2)     | 0.6 (1.2)     | 0.6 (1.2)     | 0.6 (1.2)     | 0.6 (1.2)     | 0.6 (1.2)     | 1.3 (1.8)   | 1.3 (1.8)   | 0.6 (1.2)     | 0.6 (1.2)     | 1.0 (1.7)     | 1.0 (1.7)     | 1.0 (1.7)     | 1.0 (1.7)     | Comorbidities, n (%)                            |             |             |             |             |             |             |             |             |             |             |             |             |               |               |               |               | Acquired immunodeficiency syndrome (AIDS) | 11 (0.4%)     | 11 (0.4%)     | 10 (0.2%)   | 11 (0.3%)   | 11 (0.3%)   | 11 (0.3%)   | 11 (0.3%)   | 11 (0.3%)   | 19 (0.4%)     | 19 (0.4%)     | 27 (0.5%)     | 26 (0.4%)     | 64 (0.4%)     | 64 (0.4%)     | 64 (0.4%)     | 64 (0.4%)     | Alcohol abuse            | 148 (4.5%)    | 148 (4.5%)    | 87 (2.0%)     | 86 (2.0%)     | 86 (2.0%)     | 86 (2.0%)     | 86 (2.0%)     | 86 (2.0%)     | 106 (2.4%)    | 106 (2.4%)    | 205 (3.4%)    | 205 (3.4%)    | 591 (3.3%)    | 591 (3.3%)    | 591 (3.3%)    | 591 (3.3%)    | Anemia                               | 811 (24.4%)   | 811 (24.4%)   | 795 (18.2%)   | 795 (18.2%)   | 795 (18.2%)   | 795 (18.2%)   | 795 (18.2%)   | 795 (18.2%)   | 701 (16.5%)   | 701 (16.5%)   | 686 (11.5%)   | 686 (11.5%)   | 2,562 (14.3%) | 2,562 (14.3%) | 2,562 (14.3%) | 2,562 (14.3%) | Bleeding                                     | 66 (2.0%)   | 67 (2.1%)   | 17 (0.4%)   | 16 (0.4%)   | 16 (0.4%)   | 16 (0.4%)   | 16 (0.4%)   | 16 (0.4%)   | 65 (1.5%)   | 65 (1.5%)   | 81 (1.4%)  | 77 (1.3%)  | 261 (1.5%)    | 261 (1.5%)    | 261 (1.5%)    | 261 (1.5%)    | Central venous catheter  | 152 (4.6%)    | 137 (4.1%)    | 99 (2.3%)     | 99 (2.3%)     | 99 (2.3%)     | 99 (2.3%)     | 99 (2.3%)     | 99 (2.3%)     | 181 (4.2%)    | 181 (4.2%)    | 255 (4.3%)    | 229 (3.9%)    | 689 (3.9%)    | 689 (3.9%)    | 689 (3.9%)    | 689 (3.9%)    | Cerebrovascular disease (stroke/TIA)            | 406 (12.4%)   | 406 (12.4%)   | 276 (6.3%)    | 276 (6.3%)    | 276 (6.3%)    | 276 (6.3%)    | 276 (6.3%)    | 276 (6.3%)    | 317 (7.3%)    | 317 (7.3%)    | 323 (5.5%)    | 323 (5.5%)    | 1,242 (6.9%)  | 1,242 (6.9%)  | 1,242 (6.9%)  | 1,242 (6.9%)  | Chronic obstructive pulmonary disease (COPD) | 876 (26.4%) | 876 (26.4%) | 888 (20.0%) | 888 (20.0%) | 888 (20.0%) | 888 (20.0%) | 888 (20.0%) | 888 (20.0%) | 598 (13.8%) | 598 (13.8%) | 398 (6.7%)    | 398 (6.7%)    | 2,155 (12.1%) | 2,155 (12.1%) | 2,155 (12.1%) | 2,155 (12.1%) | Coagulopathy         | 38 (1.1%)     | 49 (1.5%)     | 38 (0.9%)   | 30 (0.7%)   | 30 (0.7%)   | 30 (0.7%)   | 30 (0.7%)   | 30 (0.7%)   | 56 (1.3%)     | 56 (1.3%)     | 51 (0.9%)     | 51 (0.9%)     | 221 (1.2%)    | 221 (1.2%)    | 221 (1.2%)    | 221 (1.2%)    | Congestive heart failure                        | 1,127 (34.0%) | 1,127 (34.0%) | 1,114 (25.0%) | 1,114 (25.0%) | 1,114 (25.0%) | 1,114 (25.0%) | 1,114 (25.0%) | 1,114 (25.0%) | 924 (21.2%) | 924 (21.2%) | 874 (14.7%)   | 874 (14.7%)   | 3,466 (19.4%) | 3,466 (19.4%) | 3,466 (19.4%) | 3,466 (19.4%) | Ischemic heart/coronary artery disease | 217 (7.1%)  | 184 (5.5%)  | 541 (12.2%) | 441 (10.2%) | 441 (10.2%) | 441 (10.2%) | 441 (10.2%) | 441 (10.2%) | 152 (3.5%)  | 152 (3.5%)  | 25 (0.4%)     | 21 (0.4%)     | 508 (2.8%)    | 425 (2.4%)    | 508 (2.8%)    | 425 (2.4%)    | Dementia                                  | 1,269 (39.4%) | 1,269 (39.4%) | 942 (21.6%) | 942 (21.6%) | 942 (21.6%) | 942 (21.6%) | 942 (21.6%) | 942 (21.6%) | 1,100 (25.0%) | 1,100 (25.0%) | 1,040 (17.6%) | 1,040 (17.6%) | 4,342 (24.3%) | 4,342 (24.3%) | 4,342 (24.3%) | 4,342 (24.3%) | Diabetes                 | 708 (22.1%)   | 708 (22.1%)   | 1,113 (25.3%) | 1,113 (25.3%) | 1,113 (25.3%) | 1,113 (25.3%) | 1,113 (25.3%) | 1,113 (25.3%) | 978 (22.5%)   | 978 (22.5%)   | 1,031 (17.8%) | 1,031 (17.8%) | 3,271 (18.3%) | 3,271 (18.3%) | 3,271 (18.3%) | 3,271 (18.3%) | Disability   | 170 (5.1%)    | 170 (5.1%)    | 436 (10.0%)   | 436 (10.0%)   | 436 (10.0%)   | 436 (10.0%)   | 436 (10.0%)   | 436 (10.0%)   | 323 (7.4%)    | 323 (7.4%)    | 371 (6.4%)    | 371 (6.4%)    | 1,669 (9.3%)  | 1,669 (9.3%)  | 1,669 (9.3%)  | 1,669 (9.3%)  | Fractures involving the lower extremities   | 76 (2.3%) | 76 (2.3%) | 217 (5.0%) | 217 (5.0%) | 217 (5.0%) | 217 (5.0%) | 217 (5.0%) | 217 (5.0%) | 44 (1.0%) | 44 (1.0%) | 43 (0.8%) | 43 (0.8%) | 191 (1.1%) | 191 (1.1%) | 191 (1.1%) | 191 (1.1%) | Hemiplegia or paraplegia | 2,150 (64.8%) | 2,150 (64.8%) | 1,747 (40.1%) | 1,668 (38.3%) | 1,668 (38.3%) | 1,668 (38.3%) | 1,668 (38.3%) | 1,668 (38.3%) | 2,120 (50.0%) | 2,120 (50.0%) | 1,907 (32.0%) | 1,907 (32.0%) | 7,875 (44.0%) | 7,875 (44.0%) | 7,875 (44.0%) | 7,875 (44.0%) | Hypertension                                    | 2,680 (80.8%) | 2,680 (80.8%) | 2,648 (79.6%) | 2,648 (79.6%) | 2,648 (79.6%) | 2,648 (79.6%) | 2,648 (79.6%) | 2,648 (79.6%) | 2,499 (58.9%) | 2,499 (58.9%) | 2,054 (34.3%) | 2,054 (34.3%) | 9,799 (54.8%) | 9,799 (54.8%) | 9,799 (54.8%) | 9,799 (54.8%) | Hypertension<br>inflammatory bowel syndrome | 38 (1.1%)   | 35 (1.1%)   | 32 (0.7%)   | 37 (0.8%)   | 37 (0.8%)   | 37 (0.8%)   | 37 (0.8%)   | 37 (0.8%)   | 29 (0.7%)   | 29 (0.7%)   | 80 (1.3%)     | 94 (1.6%)     | 179 (1.0%)    | 190 (1.1%)    | 190 (1.1%)    | 190 (1.1%)    | Liver disease        | 235 (7.1%) | 246 (7.4%) | 154 (3.5%) | 154 (3.5%) | 154 (3.5%) | 154 (3.5%) | 154 (3.5%) | 154 (3.5%) | 267 (6.3%) | 267 (6.3%) | 361 (6.1%) | 361 (6.1%) | 998 (5.6%) | 1,031 (5.8%) | 1,031 (5.8%) | 1,031 (5.8%) | Malignancy (excluding non-melanoma skin cancer) | 50 (1.5%) | 46 (1.4%) | 21 (0.5%) | 21 (0.5%) | 21 (0.5%) | 21 (0.5%) | 21 (0.5%) | 21 (0.5%) | 62 (1.4%) | 62 (1.4%) | 216 (3.7%) | 216 (3.7%) | 200 (1.1%) | 200 (1.1%) | 200 (1.1%) | 200 (1.1%) | Obesity | 859 (25.9%) | 843 (25.4%) | 565 (13.0%) | 580 (13.3%) | 580 (13.3%) | 580 (13.3%) | 580 (13.3%) | 580 (13.3%) | 859 (20.2%) | 859 (20.2%) | 1,267 (21.3%) | 1,267 (21.3%) | 3,549 (19.9%) | 3,549 (19.9%) | 3,549 (19.9%) | 3,549 (19.9%) | Peptic ulcer disease | 52 (1.6%) | 46 (1.4%) | 39 (0.9%) | 39 (0.9%) | 39 (0.9%) | 39 (0.9%) | 39 (0.9%) | 39 (0.9%) | 39 (0.9%) | 39 (0.9%) | 41 (0.7%) | 41 (0.7%) | 160 (0.9%) | 154 (0.9%) | 154 (0.9%) |  |
| Acute-care inpatient                            | 2,097 (63.2%)         | 2,097 (63.2%)         | 2,597 (59.6%)         | 2,597 (59.6%)         | 2,597 (59.6%)         | 2,597 (59.6%)         | 2,597 (59.6%)         | 2,597 (59.6%)         | 2,334 (55.0%)         | 2,334 (55.0%)         | 2,655 (44.5%)         | 2,655 (44.5%)         | 9,683 (54.2%)          | 9,683 (54.2%)          | 9,683 (54.2%)          | 9,683 (54.2%)          |                                            |               |               |               |               |               |               |               |               |               |               |               |               |               |               |               |               |                      |               |               |               |               |               |               |               |               |               |               |               |               |               |               |               |               |                                           |               |               |               |               |               |               |               |               |               |               |               |               |               |               |               |               |                             |               |               |               |               |               |               |               |               |               |               |               |               |               |               |               |               |                            |             |             |               |               |               |               |               |               |               |               |               |               |               |               |               |               |                                      |               |               |               |               |               |               |               |               |               |               |               |               |                |                |                |                |                                              |               |               |               |               |               |               |               |               |               |               |               |               |               |               |               |               |                                            |               |               |               |               |               |               |               |               |               |               |               |               |               |               |               |               |                                              |               |               |               |               |               |               |               |               |               |               |               |               |                |                |                |                |                                           |               |               |               |               |               |               |               |               |               |               |               |               |               |               |               |               |                          |               |               |               |               |               |               |               |               |               |               |               |               |               |               |               |               |                                            |             |             |               |               |               |               |               |               |               |               |               |               |               |               |               |               |                             |               |               |               |               |               |               |               |               |               |               |               |               |               |               |               |               |                                           |               |               |               |               |               |               |               |               |               |               |               |               |               |               |               |               |                                      |               |               |               |               |               |               |               |               |               |               |               |               |               |               |               |               |                                              |               |               |               |               |               |               |               |               |               |               |               |               |               |               |               |               |                                             |               |               |               |               |               |               |               |               |               |               |               |               |               |               |               |               |                                            |               |               |               |               |               |               |               |               |               |               |               |               |               |               |               |               |                                                 |             |             |             |             |             |             |             |             |            |            |            |            |              |              |              |              |                                              |               |               |               |               |               |               |               |               |               |               |               |               |               |               |               |               |                                                 |               |               |               |               |               |               |               |               |               |               |               |               |               |               |               |               |                          |               |               |               |               |               |               |               |               |               |               |               |               |               |               |               |               |                                           |               |               |               |               |               |               |               |               |               |               |               |               |               |               |               |               |                          |               |               |               |               |               |               |               |               |               |               |               |               |               |               |               |               |                                      |               |               |               |               |               |               |               |               |               |               |               |               |               |               |               |               |                                              |               |               |               |               |               |               |               |               |               |               |               |               |               |               |               |               |                                           |            |            |             |             |             |             |             |             |             |             |             |             |               |               |               |               |                                                 |               |               |               |               |               |               |               |               |               |               |               |               |               |               |               |               |                                              |               |               |               |               |               |               |               |               |               |               |               |               |               |               |               |               |                                             |               |               |             |             |             |             |             |             |               |               |               |               |               |               |               |               |                                            |               |               |               |               |               |               |               |               |             |             |               |               |               |               |               |               |                                                 |             |             |             |             |             |             |             |             |             |             |             |             |               |               |               |               |                                           |               |               |             |             |             |             |             |             |               |               |               |               |               |               |               |               |                          |               |               |               |               |               |               |               |               |               |               |               |               |               |               |               |               |                                      |               |               |               |               |               |               |               |               |               |               |               |               |               |               |               |               |                                              |             |             |             |             |             |             |             |             |             |             |            |            |               |               |               |               |                          |               |               |               |               |               |               |               |               |               |               |               |               |               |               |               |               |                                                 |               |               |               |               |               |               |               |               |               |               |               |               |               |               |               |               |                                              |             |             |             |             |             |             |             |             |             |             |               |               |               |               |               |               |                      |               |               |             |             |             |             |             |             |               |               |               |               |               |               |               |               |                                                 |               |               |               |               |               |               |               |               |             |             |               |               |               |               |               |               |                                        |             |             |             |             |             |             |             |             |             |             |               |               |               |               |               |               |                                           |               |               |             |             |             |             |             |             |               |               |               |               |               |               |               |               |                          |               |               |               |               |               |               |               |               |               |               |               |               |               |               |               |               |              |               |               |               |               |               |               |               |               |               |               |               |               |               |               |               |               |                                             |           |           |            |            |            |            |            |            |           |           |           |           |            |            |            |            |                          |               |               |               |               |               |               |               |               |               |               |               |               |               |               |               |               |                                                 |               |               |               |               |               |               |               |               |               |               |               |               |               |               |               |               |                                             |             |             |             |             |             |             |             |             |             |             |               |               |               |               |               |               |                      |            |            |            |            |            |            |            |            |            |            |            |            |            |              |              |              |                                                 |           |           |           |           |           |           |           |           |           |           |            |            |            |            |            |            |         |             |             |             |             |             |             |             |             |             |             |               |               |               |               |               |               |                      |           |           |           |           |           |           |           |           |           |           |           |           |            |            |            |  |
| Ambulatory care                                 | 1,221 (38.6%)         | 1,221 (38.6%)         | 1,759 (40.4%)         | 1,759 (40.4%)         | 1,759 (40.4%)         | 1,759 (40.4%)         | 1,759 (40.4%)         | 1,759 (40.4%)         | 1,909 (45.0%)         | 1,909 (45.0%)         | 3,300 (55.5%)         | 3,300 (55.5%)         | 8,195 (45.8%)          | 8,195 (45.8%)          | 8,195 (45.8%)          | 8,195 (45.8%)          |                                            |               |               |               |               |               |               |               |               |               |               |               |               |               |               |               |               |                      |               |               |               |               |               |               |               |               |               |               |               |               |               |               |               |               |                                           |               |               |               |               |               |               |               |               |               |               |               |               |               |               |               |               |                             |               |               |               |               |               |               |               |               |               |               |               |               |               |               |               |               |                            |             |             |               |               |               |               |               |               |               |               |               |               |               |               |               |               |                                      |               |               |               |               |               |               |               |               |               |               |               |               |                |                |                |                |                                              |               |               |               |               |               |               |               |               |               |               |               |               |               |               |               |               |                                            |               |               |               |               |               |               |               |               |               |               |               |               |               |               |               |               |                                              |               |               |               |               |               |               |               |               |               |               |               |               |                |                |                |                |                                           |               |               |               |               |               |               |               |               |               |               |               |               |               |               |               |               |                          |               |               |               |               |               |               |               |               |               |               |               |               |               |               |               |               |                                            |             |             |               |               |               |               |               |               |               |               |               |               |               |               |               |               |                             |               |               |               |               |               |               |               |               |               |               |               |               |               |               |               |               |                                           |               |               |               |               |               |               |               |               |               |               |               |               |               |               |               |               |                                      |               |               |               |               |               |               |               |               |               |               |               |               |               |               |               |               |                                              |               |               |               |               |               |               |               |               |               |               |               |               |               |               |               |               |                                             |               |               |               |               |               |               |               |               |               |               |               |               |               |               |               |               |                                            |               |               |               |               |               |               |               |               |               |               |               |               |               |               |               |               |                                                 |             |             |             |             |             |             |             |             |            |            |            |            |              |              |              |              |                                              |               |               |               |               |               |               |               |               |               |               |               |               |               |               |               |               |                                                 |               |               |               |               |               |               |               |               |               |               |               |               |               |               |               |               |                          |               |               |               |               |               |               |               |               |               |               |               |               |               |               |               |               |                                           |               |               |               |               |               |               |               |               |               |               |               |               |               |               |               |               |                          |               |               |               |               |               |               |               |               |               |               |               |               |               |               |               |               |                                      |               |               |               |               |               |               |               |               |               |               |               |               |               |               |               |               |                                              |               |               |               |               |               |               |               |               |               |               |               |               |               |               |               |               |                                           |            |            |             |             |             |             |             |             |             |             |             |             |               |               |               |               |                                                 |               |               |               |               |               |               |               |               |               |               |               |               |               |               |               |               |                                              |               |               |               |               |               |               |               |               |               |               |               |               |               |               |               |               |                                             |               |               |             |             |             |             |             |             |               |               |               |               |               |               |               |               |                                            |               |               |               |               |               |               |               |               |             |             |               |               |               |               |               |               |                                                 |             |             |             |             |             |             |             |             |             |             |             |             |               |               |               |               |                                           |               |               |             |             |             |             |             |             |               |               |               |               |               |               |               |               |                          |               |               |               |               |               |               |               |               |               |               |               |               |               |               |               |               |                                      |               |               |               |               |               |               |               |               |               |               |               |               |               |               |               |               |                                              |             |             |             |             |             |             |             |             |             |             |            |            |               |               |               |               |                          |               |               |               |               |               |               |               |               |               |               |               |               |               |               |               |               |                                                 |               |               |               |               |               |               |               |               |               |               |               |               |               |               |               |               |                                              |             |             |             |             |             |             |             |             |             |             |               |               |               |               |               |               |                      |               |               |             |             |             |             |             |             |               |               |               |               |               |               |               |               |                                                 |               |               |               |               |               |               |               |               |             |             |               |               |               |               |               |               |                                        |             |             |             |             |             |             |             |             |             |             |               |               |               |               |               |               |                                           |               |               |             |             |             |             |             |             |               |               |               |               |               |               |               |               |                          |               |               |               |               |               |               |               |               |               |               |               |               |               |               |               |               |              |               |               |               |               |               |               |               |               |               |               |               |               |               |               |               |               |                                             |           |           |            |            |            |            |            |            |           |           |           |           |            |            |            |            |                          |               |               |               |               |               |               |               |               |               |               |               |               |               |               |               |               |                                                 |               |               |               |               |               |               |               |               |               |               |               |               |               |               |               |               |                                             |             |             |             |             |             |             |             |             |             |             |               |               |               |               |               |               |                      |            |            |            |            |            |            |            |            |            |            |            |            |            |              |              |              |                                                 |           |           |           |           |           |           |           |           |           |           |            |            |            |            |            |            |         |             |             |             |             |             |             |             |             |             |             |               |               |               |               |               |               |                      |           |           |           |           |           |           |           |           |           |           |           |           |            |            |            |  |
| Diagnosis:                                      |                       |                       |                       |                       |                       |                       |                       |                       |                       |                       |                       |                       |                        |                        |                        |                        | PE (with or without DVT)                   | 1,376 (41.5%) | 1,376 (41.5%) | 1,954 (44.9%) | 1,954 (44.9%) | 1,954 (44.9%) | 1,954 (44.9%) | 1,954 (44.9%) | 1,954 (44.9%) | 2,120 (50.1%) | 2,120 (50.1%) | 2,210 (37.1%) | 2,210 (37.1%) | 7,322 (41.0%) | 7,322 (41.0%) | 7,322 (41.0%) | 7,322 (41.0%) | PE with DVT          | 765 (23.9%)   | 765 (23.9%)   | 1,054 (24.2%) | 1,054 (24.2%) | 1,054 (24.2%) | 1,054 (24.2%) | 1,054 (24.2%) | 1,054 (24.2%) | 1,154 (26.5%) | 1,154 (26.5%) | 1,210 (20.7%) | 1,210 (20.7%) | 4,165 (23.3%) | 4,165 (23.3%) | 4,165 (23.3%) | 4,165 (23.3%) | PE without DVT                            | 611 (19.1%)   | 611 (19.1%)   | 900 (20.7%)   | 900 (20.7%)   | 900 (20.7%)   | 900 (20.7%)   | 900 (20.7%)   | 900 (20.7%)   | 966 (22.5%)   | 966 (22.5%)   | 1,000 (16.4%) | 1,000 (16.4%) | 3,157 (17.7%) | 3,157 (17.7%) | 3,157 (17.7%) | 3,157 (17.7%) | DVT only                    | 1,342 (42.3%) | 1,342 (42.3%) | 1,944 (45.0%) | 1,944 (45.0%) | 1,944 (45.0%) | 1,944 (45.0%) | 1,944 (45.0%) | 1,944 (45.0%) | 2,044 (47.0%) | 2,044 (47.0%) | 2,000 (33.8%) | 2,000 (33.8%) | 7,015 (39.1%) | 7,015 (39.1%) | 7,015 (39.1%) | 7,015 (39.1%) | Prevented atherothrombosis | 798 (24.1%) | 798 (24.1%) | 1,010 (23.2%) | 1,010 (23.2%) | 1,010 (23.2%) | 1,010 (23.2%) | 1,010 (23.2%) | 1,010 (23.2%) | 892 (21.0%)   | 892 (21.0%)   | 1,369 (23.0%) | 1,369 (23.0%) | 4,969 (27.8%) | 4,969 (27.8%) | 4,969 (27.8%) | 4,969 (27.8%) | Prevented thromboembolism            | 2,520 (75.9%) | 2,520 (75.9%) | 3,348 (76.8%) | 3,348 (76.8%) | 3,348 (76.8%) | 3,348 (76.8%) | 3,348 (76.8%) | 3,348 (76.8%) | 3,551 (79.0%) | 3,551 (79.0%) | 4,592 (77.0%) | 4,592 (77.0%) | 13,809 (77.2%) | 13,809 (77.2%) | 13,809 (77.2%) | 13,809 (77.2%) | Age, n (%)                                   |               |               |               |               |               |               |               |               |               |               |               |               |               |               |               |               | Mean (SD)                                  | 71.5 (13.3)   | 71.5 (13.3)   | 57.8 (15.8)   | 57.8 (15.8)   | 57.8 (15.8)   | 57.8 (15.8)   | 57.8 (15.8)   | 57.8 (15.8)   | 65.2 (15.5)   | 65.2 (15.5)   | 51.4 (12.1)   | 51.4 (12.1)   | 60.0 (16.0)   | 60.0 (16.0)   | 60.0 (16.0)   | 60.0 (16.0)   | Median                                       | 72            | 72            | 57            | 57            | 57            | 57            | 57            | 57            | 67            | 67            | 53            | 53            | 60             | 60             | 60             | 60             | Age (years), n (%)                        |               |               |               |               |               |               |               |               |               |               |               |               |               |               |               |               | 18-49 years              | 186 (5.6%)    | 186 (5.6%)    | 1,221 (28.1%) | 1,221 (28.1%) | 1,221 (28.1%) | 1,221 (28.1%) | 1,221 (28.1%) | 1,221 (28.1%) | 732 (17.3%)   | 732 (17.3%)   | 2,389 (38.4%) | 2,389 (38.4%) | 4,428 (24.8%) | 4,428 (24.8%) | 4,428 (24.8%) | 4,428 (24.8%) | 50-64 years                                | 663 (20.0%) | 663 (20.0%) | 1,902 (43.7%) | 1,902 (43.7%) | 1,902 (43.7%) | 1,902 (43.7%) | 1,902 (43.7%) | 1,902 (43.7%) | 1,169 (27.6%) | 1,169 (27.6%) | 3,140 (52.7%) | 3,140 (52.7%) | 6,874 (38.7%) | 6,874 (38.7%) | 6,874 (38.7%) | 6,874 (38.7%) | 65-74 years                 | 1,162 (35.0%) | 1,162 (35.0%) | 510 (11.7%)   | 510 (11.7%)   | 510 (11.7%)   | 510 (11.7%)   | 510 (11.7%)   | 510 (11.7%)   | 1,059 (25.0%) | 1,059 (25.0%) | 411 (6.9%)    | 411 (6.9%)    | 3,142 (17.6%) | 3,142 (17.6%) | 3,142 (17.6%) | 3,142 (17.6%) | ≥75 years                                 | 1,307 (39.4%) | 1,307 (39.4%) | 719 (16.5%)   | 719 (16.5%)   | 719 (16.5%)   | 719 (16.5%)   | 719 (16.5%)   | 719 (16.5%)   | 1,283 (30.2%) | 1,283 (30.2%) | 121 (2.0%)    | 121 (2.0%)    | 3,430 (19.2%) | 3,430 (19.2%) | 3,430 (19.2%) | 3,430 (19.2%) | Missing                              | —             | —             | —             | —             | —             | —             | —             | —             | —             | —             | —             | —             | —             | —             | —             | —             | Sex, n (%)                                   |               |               |               |               |               |               |               |               |               |               |               |               |               |               |               |               | Male                                        | 1,417 (42.7%) | 1,417 (42.7%) | 2,327 (53.4%) | 2,327 (53.4%) | 2,327 (53.4%) | 2,327 (53.4%) | 2,327 (53.4%) | 2,327 (53.4%) | 2,046 (48.7%) | 2,046 (48.7%) | 3,461 (58.1%) | 3,461 (58.1%) | 9,279 (51.9%) | 9,279 (51.9%) | 9,279 (51.9%) | 9,279 (51.9%) | Female                                     | 1,901 (57.3%) | 1,901 (57.3%) | 2,029 (46.6%) | 2,029 (46.6%) | 2,029 (46.6%) | 2,029 (46.6%) | 2,029 (46.6%) | 2,029 (46.6%) | 2,199 (51.3%) | 2,199 (51.3%) | 2,499 (41.9%) | 2,499 (41.9%) | 8,599 (48.1%) | 8,599 (48.1%) | 8,599 (48.1%) | 8,599 (48.1%) | Missing                                         | —           | —           | —           | —           | —           | —           | —           | —           | —          | —          | —          | —          | —            | —            | —            | —            | US Geographic Region, n (%)                  |               |               |               |               |               |               |               |               |               |               |               |               |               |               |               |               | East                                            | 72 (2.2%)     | 72 (2.2%)     | 724 (16.6%)   | 724 (16.6%)   | 724 (16.6%)   | 724 (16.6%)   | 724 (16.6%)   | 724 (16.6%)   | 402 (9.5%)    | 402 (9.5%)    | 1,080 (18.1%) | 1,080 (18.1%) | 2,278 (12.7%) | 2,278 (12.7%) | 2,278 (12.7%) | 2,278 (12.7%) | Midwest                  | 693 (22.2%)   | 693 (22.2%)   | 2,097 (48.2%) | 2,097 (48.2%) | 2,097 (48.2%) | 2,097 (48.2%) | 2,097 (48.2%) | 2,097 (48.2%) | 1,175 (27.3%) | 1,175 (27.3%) | 1,491 (25.9%) | 1,491 (25.9%) | 5,347 (30.0%) | 5,347 (30.0%) | 5,347 (30.0%) | 5,347 (30.0%) | South                                     | 2,065 (66.0%) | 2,065 (66.0%) | 2,065 (47.5%) | 2,065 (47.5%) | 2,065 (47.5%) | 2,065 (47.5%) | 2,065 (47.5%) | 2,065 (47.5%) | 1,856 (42.8%) | 1,856 (42.8%) | 2,126 (36.5%) | 2,126 (36.5%) | 7,372 (41.3%) | 7,372 (41.3%) | 7,372 (41.3%) | 7,372 (41.3%) | West                     | 265 (8.0%)    | 265 (8.0%)    | 480 (11.0%)   | 480 (11.0%)   | 480 (11.0%)   | 480 (11.0%)   | 480 (11.0%)   | 480 (11.0%)   | 856 (20.2%)   | 856 (20.2%)   | 588 (10.3%)   | 588 (10.3%)   | 2,189 (12.2%) | 2,189 (12.2%) | 2,189 (12.2%) | 2,189 (12.2%) | Other                                | —             | —             | 15 (0.3%)     | 15 (0.3%)     | 15 (0.3%)     | 15 (0.3%)     | 15 (0.3%)     | 15 (0.3%)     | —             | —             | —             | —             | 15 (0.1%)     | 15 (0.1%)     | 15 (0.1%)     | 15 (0.1%)     | Missing                                      | —             | —             | —             | —             | —             | —             | —             | —             | —             | —             | —             | —             | —             | —             | —             | —             | Comorbidity Profile                       |            |            |             |             |             |             |             |             |             |             |             |             |               |               |               |               | Deyo-Charlson Comorbidity Index, mean (SD)      | 2.0 (2.1)     | 2.1 (2.1)     | 0.7 (1.2)     | 0.6 (1.2)     | 0.6 (1.2)     | 0.6 (1.2)     | 0.6 (1.2)     | 0.6 (1.2)     | 1.3 (1.8)     | 1.3 (1.8)     | 0.6 (1.2)     | 0.6 (1.2)     | 1.0 (1.7)     | 1.0 (1.7)     | 1.0 (1.7)     | 1.0 (1.7)     | Comorbidities, n (%)                         |               |               |               |               |               |               |               |               |               |               |               |               |               |               |               |               | Acquired immunodeficiency syndrome (AIDS)   | 11 (0.4%)     | 11 (0.4%)     | 10 (0.2%)   | 11 (0.3%)   | 11 (0.3%)   | 11 (0.3%)   | 11 (0.3%)   | 11 (0.3%)   | 19 (0.4%)     | 19 (0.4%)     | 27 (0.5%)     | 26 (0.4%)     | 64 (0.4%)     | 64 (0.4%)     | 64 (0.4%)     | 64 (0.4%)     | Alcohol abuse                              | 148 (4.5%)    | 148 (4.5%)    | 87 (2.0%)     | 86 (2.0%)     | 86 (2.0%)     | 86 (2.0%)     | 86 (2.0%)     | 86 (2.0%)     | 106 (2.4%)  | 106 (2.4%)  | 205 (3.4%)    | 205 (3.4%)    | 591 (3.3%)    | 591 (3.3%)    | 591 (3.3%)    | 591 (3.3%)    | Anemia                                          | 811 (24.4%) | 811 (24.4%) | 795 (18.2%) | 795 (18.2%) | 795 (18.2%) | 795 (18.2%) | 795 (18.2%) | 795 (18.2%) | 701 (16.5%) | 701 (16.5%) | 686 (11.5%) | 686 (11.5%) | 2,562 (14.3%) | 2,562 (14.3%) | 2,562 (14.3%) | 2,562 (14.3%) | Bleeding                                  | 66 (2.0%)     | 67 (2.1%)     | 17 (0.4%)   | 16 (0.4%)   | 16 (0.4%)   | 16 (0.4%)   | 16 (0.4%)   | 16 (0.4%)   | 65 (1.5%)     | 65 (1.5%)     | 81 (1.4%)     | 77 (1.3%)     | 261 (1.5%)    | 261 (1.5%)    | 261 (1.5%)    | 261 (1.5%)    | Central venous catheter  | 152 (4.6%)    | 137 (4.1%)    | 99 (2.3%)     | 99 (2.3%)     | 99 (2.3%)     | 99 (2.3%)     | 99 (2.3%)     | 99 (2.3%)     | 181 (4.2%)    | 181 (4.2%)    | 255 (4.3%)    | 229 (3.9%)    | 689 (3.9%)    | 689 (3.9%)    | 689 (3.9%)    | 689 (3.9%)    | Cerebrovascular disease (stroke/TIA) | 406 (12.4%)   | 406 (12.4%)   | 276 (6.3%)    | 276 (6.3%)    | 276 (6.3%)    | 276 (6.3%)    | 276 (6.3%)    | 276 (6.3%)    | 317 (7.3%)    | 317 (7.3%)    | 323 (5.5%)    | 323 (5.5%)    | 1,242 (6.9%)  | 1,242 (6.9%)  | 1,242 (6.9%)  | 1,242 (6.9%)  | Chronic obstructive pulmonary disease (COPD) | 876 (26.4%) | 876 (26.4%) | 888 (20.0%) | 888 (20.0%) | 888 (20.0%) | 888 (20.0%) | 888 (20.0%) | 888 (20.0%) | 598 (13.8%) | 598 (13.8%) | 398 (6.7%) | 398 (6.7%) | 2,155 (12.1%) | 2,155 (12.1%) | 2,155 (12.1%) | 2,155 (12.1%) | Coagulopathy             | 38 (1.1%)     | 49 (1.5%)     | 38 (0.9%)     | 30 (0.7%)     | 30 (0.7%)     | 30 (0.7%)     | 30 (0.7%)     | 30 (0.7%)     | 56 (1.3%)     | 56 (1.3%)     | 51 (0.9%)     | 51 (0.9%)     | 221 (1.2%)    | 221 (1.2%)    | 221 (1.2%)    | 221 (1.2%)    | Congestive heart failure                        | 1,127 (34.0%) | 1,127 (34.0%) | 1,114 (25.0%) | 1,114 (25.0%) | 1,114 (25.0%) | 1,114 (25.0%) | 1,114 (25.0%) | 1,114 (25.0%) | 924 (21.2%)   | 924 (21.2%)   | 874 (14.7%)   | 874 (14.7%)   | 3,466 (19.4%) | 3,466 (19.4%) | 3,466 (19.4%) | 3,466 (19.4%) | Ischemic heart/coronary artery disease       | 217 (7.1%)  | 184 (5.5%)  | 541 (12.2%) | 441 (10.2%) | 441 (10.2%) | 441 (10.2%) | 441 (10.2%) | 441 (10.2%) | 152 (3.5%)  | 152 (3.5%)  | 25 (0.4%)     | 21 (0.4%)     | 508 (2.8%)    | 425 (2.4%)    | 508 (2.8%)    | 425 (2.4%)    | Dementia             | 1,269 (39.4%) | 1,269 (39.4%) | 942 (21.6%) | 942 (21.6%) | 942 (21.6%) | 942 (21.6%) | 942 (21.6%) | 942 (21.6%) | 1,100 (25.0%) | 1,100 (25.0%) | 1,040 (17.6%) | 1,040 (17.6%) | 4,342 (24.3%) | 4,342 (24.3%) | 4,342 (24.3%) | 4,342 (24.3%) | Diabetes                                        | 708 (22.1%)   | 708 (22.1%)   | 1,113 (25.3%) | 1,113 (25.3%) | 1,113 (25.3%) | 1,113 (25.3%) | 1,113 (25.3%) | 1,113 (25.3%) | 978 (22.5%) | 978 (22.5%) | 1,031 (17.8%) | 1,031 (17.8%) | 3,271 (18.3%) | 3,271 (18.3%) | 3,271 (18.3%) | 3,271 (18.3%) | Disability                             | 170 (5.1%)  | 170 (5.1%)  | 436 (10.0%) | 436 (10.0%) | 436 (10.0%) | 436 (10.0%) | 436 (10.0%) | 436 (10.0%) | 323 (7.4%)  | 323 (7.4%)  | 371 (6.4%)    | 371 (6.4%)    | 1,669 (9.3%)  | 1,669 (9.3%)  | 1,669 (9.3%)  | 1,669 (9.3%)  | Fractures involving the lower extremities | 76 (2.3%)     | 76 (2.3%)     | 217 (5.0%)  | 217 (5.0%)  | 217 (5.0%)  | 217 (5.0%)  | 217 (5.0%)  | 217 (5.0%)  | 44 (1.0%)     | 44 (1.0%)     | 43 (0.8%)     | 43 (0.8%)     | 191 (1.1%)    | 191 (1.1%)    | 191 (1.1%)    | 191 (1.1%)    | Hemiplegia or paraplegia | 2,150 (64.8%) | 2,150 (64.8%) | 1,747 (40.1%) | 1,668 (38.3%) | 1,668 (38.3%) | 1,668 (38.3%) | 1,668 (38.3%) | 1,668 (38.3%) | 2,120 (50.0%) | 2,120 (50.0%) | 1,907 (32.0%) | 1,907 (32.0%) | 7,875 (44.0%) | 7,875 (44.0%) | 7,875 (44.0%) | 7,875 (44.0%) | Hypertension | 2,680 (80.8%) | 2,680 (80.8%) | 2,648 (79.6%) | 2,648 (79.6%) | 2,648 (79.6%) | 2,648 (79.6%) | 2,648 (79.6%) | 2,648 (79.6%) | 2,499 (58.9%) | 2,499 (58.9%) | 2,054 (34.3%) | 2,054 (34.3%) | 9,799 (54.8%) | 9,799 (54.8%) | 9,799 (54.8%) | 9,799 (54.8%) | Hypertension<br>inflammatory bowel syndrome | 38 (1.1%) | 35 (1.1%) | 32 (0.7%)  | 37 (0.8%)  | 37 (0.8%)  | 37 (0.8%)  | 37 (0.8%)  | 37 (0.8%)  | 29 (0.7%) | 29 (0.7%) | 80 (1.3%) | 94 (1.6%) | 179 (1.0%) | 190 (1.1%) | 190 (1.1%) | 190 (1.1%) | Liver disease            | 235 (7.1%)    | 246 (7.4%)    | 154 (3.5%)    | 154 (3.5%)    | 154 (3.5%)    | 154 (3.5%)    | 154 (3.5%)    | 154 (3.5%)    | 267 (6.3%)    | 267 (6.3%)    | 361 (6.1%)    | 361 (6.1%)    | 998 (5.6%)    | 1,031 (5.8%)  | 1,031 (5.8%)  | 1,031 (5.8%)  | Malignancy (excluding non-melanoma skin cancer) | 50 (1.5%)     | 46 (1.4%)     | 21 (0.5%)     | 21 (0.5%)     | 21 (0.5%)     | 21 (0.5%)     | 21 (0.5%)     | 21 (0.5%)     | 62 (1.4%)     | 62 (1.4%)     | 216 (3.7%)    | 216 (3.7%)    | 200 (1.1%)    | 200 (1.1%)    | 200 (1.1%)    | 200 (1.1%)    | Obesity                                     | 859 (25.9%) | 843 (25.4%) | 565 (13.0%) | 580 (13.3%) | 580 (13.3%) | 580 (13.3%) | 580 (13.3%) | 580 (13.3%) | 859 (20.2%) | 859 (20.2%) | 1,267 (21.3%) | 1,267 (21.3%) | 3,549 (19.9%) | 3,549 (19.9%) | 3,549 (19.9%) | 3,549 (19.9%) | Peptic ulcer disease | 52 (1.6%)  | 46 (1.4%)  | 39 (0.9%)  | 39 (0.9%)  | 39 (0.9%)  | 39 (0.9%)  | 39 (0.9%)  | 39 (0.9%)  | 39 (0.9%)  | 39 (0.9%)  | 41 (0.7%)  | 41 (0.7%)  | 160 (0.9%) | 154 (0.9%)   | 154 (0.9%)   |              |                                                 |           |           |           |           |           |           |           |           |           |           |            |            |            |            |            |            |         |             |             |             |             |             |             |             |             |             |             |               |               |               |               |               |               |                      |           |           |           |           |           |           |           |           |           |           |           |           |            |            |            |  |
| PE (with or without DVT)                        | 1,376 (41.5%)         | 1,376 (41.5%)         | 1,954 (44.9%)         | 1,954 (44.9%)         | 1,954 (44.9%)         | 1,954 (44.9%)         | 1,954 (44.9%)         | 1,954 (44.9%)         | 2,120 (50.1%)         | 2,120 (50.1%)         | 2,210 (37.1%)         | 2,210 (37.1%)         | 7,322 (41.0%)          | 7,322 (41.0%)          | 7,322 (41.0%)          | 7,322 (41.0%)          |                                            |               |               |               |               |               |               |               |               |               |               |               |               |               |               |               |               |                      |               |               |               |               |               |               |               |               |               |               |               |               |               |               |               |               |                                           |               |               |               |               |               |               |               |               |               |               |               |               |               |               |               |               |                             |               |               |               |               |               |               |               |               |               |               |               |               |               |               |               |               |                            |             |             |               |               |               |               |               |               |               |               |               |               |               |               |               |               |                                      |               |               |               |               |               |               |               |               |               |               |               |               |                |                |                |                |                                              |               |               |               |               |               |               |               |               |               |               |               |               |               |               |               |               |                                            |               |               |               |               |               |               |               |               |               |               |               |               |               |               |               |               |                                              |               |               |               |               |               |               |               |               |               |               |               |               |                |                |                |                |                                           |               |               |               |               |               |               |               |               |               |               |               |               |               |               |               |               |                          |               |               |               |               |               |               |               |               |               |               |               |               |               |               |               |               |                                            |             |             |               |               |               |               |               |               |               |               |               |               |               |               |               |               |                             |               |               |               |               |               |               |               |               |               |               |               |               |               |               |               |               |                                           |               |               |               |               |               |               |               |               |               |               |               |               |               |               |               |               |                                      |               |               |               |               |               |               |               |               |               |               |               |               |               |               |               |               |                                              |               |               |               |               |               |               |               |               |               |               |               |               |               |               |               |               |                                             |               |               |               |               |               |               |               |               |               |               |               |               |               |               |               |               |                                            |               |               |               |               |               |               |               |               |               |               |               |               |               |               |               |               |                                                 |             |             |             |             |             |             |             |             |            |            |            |            |              |              |              |              |                                              |               |               |               |               |               |               |               |               |               |               |               |               |               |               |               |               |                                                 |               |               |               |               |               |               |               |               |               |               |               |               |               |               |               |               |                          |               |               |               |               |               |               |               |               |               |               |               |               |               |               |               |               |                                           |               |               |               |               |               |               |               |               |               |               |               |               |               |               |               |               |                          |               |               |               |               |               |               |               |               |               |               |               |               |               |               |               |               |                                      |               |               |               |               |               |               |               |               |               |               |               |               |               |               |               |               |                                              |               |               |               |               |               |               |               |               |               |               |               |               |               |               |               |               |                                           |            |            |             |             |             |             |             |             |             |             |             |             |               |               |               |               |                                                 |               |               |               |               |               |               |               |               |               |               |               |               |               |               |               |               |                                              |               |               |               |               |               |               |               |               |               |               |               |               |               |               |               |               |                                             |               |               |             |             |             |             |             |             |               |               |               |               |               |               |               |               |                                            |               |               |               |               |               |               |               |               |             |             |               |               |               |               |               |               |                                                 |             |             |             |             |             |             |             |             |             |             |             |             |               |               |               |               |                                           |               |               |             |             |             |             |             |             |               |               |               |               |               |               |               |               |                          |               |               |               |               |               |               |               |               |               |               |               |               |               |               |               |               |                                      |               |               |               |               |               |               |               |               |               |               |               |               |               |               |               |               |                                              |             |             |             |             |             |             |             |             |             |             |            |            |               |               |               |               |                          |               |               |               |               |               |               |               |               |               |               |               |               |               |               |               |               |                                                 |               |               |               |               |               |               |               |               |               |               |               |               |               |               |               |               |                                              |             |             |             |             |             |             |             |             |             |             |               |               |               |               |               |               |                      |               |               |             |             |             |             |             |             |               |               |               |               |               |               |               |               |                                                 |               |               |               |               |               |               |               |               |             |             |               |               |               |               |               |               |                                        |             |             |             |             |             |             |             |             |             |             |               |               |               |               |               |               |                                           |               |               |             |             |             |             |             |             |               |               |               |               |               |               |               |               |                          |               |               |               |               |               |               |               |               |               |               |               |               |               |               |               |               |              |               |               |               |               |               |               |               |               |               |               |               |               |               |               |               |               |                                             |           |           |            |            |            |            |            |            |           |           |           |           |            |            |            |            |                          |               |               |               |               |               |               |               |               |               |               |               |               |               |               |               |               |                                                 |               |               |               |               |               |               |               |               |               |               |               |               |               |               |               |               |                                             |             |             |             |             |             |             |             |             |             |             |               |               |               |               |               |               |                      |            |            |            |            |            |            |            |            |            |            |            |            |            |              |              |              |                                                 |           |           |           |           |           |           |           |           |           |           |            |            |            |            |            |            |         |             |             |             |             |             |             |             |             |             |             |               |               |               |               |               |               |                      |           |           |           |           |           |           |           |           |           |           |           |           |            |            |            |  |
| PE with DVT                                     | 765 (23.9%)           | 765 (23.9%)           | 1,054 (24.2%)         | 1,054 (24.2%)         | 1,054 (24.2%)         | 1,054 (24.2%)         | 1,054 (24.2%)         | 1,054 (24.2%)         | 1,154 (26.5%)         | 1,154 (26.5%)         | 1,210 (20.7%)         | 1,210 (20.7%)         | 4,165 (23.3%)          | 4,165 (23.3%)          | 4,165 (23.3%)          | 4,165 (23.3%)          |                                            |               |               |               |               |               |               |               |               |               |               |               |               |               |               |               |               |                      |               |               |               |               |               |               |               |               |               |               |               |               |               |               |               |               |                                           |               |               |               |               |               |               |               |               |               |               |               |               |               |               |               |               |                             |               |               |               |               |               |               |               |               |               |               |               |               |               |               |               |               |                            |             |             |               |               |               |               |               |               |               |               |               |               |               |               |               |               |                                      |               |               |               |               |               |               |               |               |               |               |               |               |                |                |                |                |                                              |               |               |               |               |               |               |               |               |               |               |               |               |               |               |               |               |                                            |               |               |               |               |               |               |               |               |               |               |               |               |               |               |               |               |                                              |               |               |               |               |               |               |               |               |               |               |               |               |                |                |                |                |                                           |               |               |               |               |               |               |               |               |               |               |               |               |               |               |               |               |                          |               |               |               |               |               |               |               |               |               |               |               |               |               |               |               |               |                                            |             |             |               |               |               |               |               |               |               |               |               |               |               |               |               |               |                             |               |               |               |               |               |               |               |               |               |               |               |               |               |               |               |               |                                           |               |               |               |               |               |               |               |               |               |               |               |               |               |               |               |               |                                      |               |               |               |               |               |               |               |               |               |               |               |               |               |               |               |               |                                              |               |               |               |               |               |               |               |               |               |               |               |               |               |               |               |               |                                             |               |               |               |               |               |               |               |               |               |               |               |               |               |               |               |               |                                            |               |               |               |               |               |               |               |               |               |               |               |               |               |               |               |               |                                                 |             |             |             |             |             |             |             |             |            |            |            |            |              |              |              |              |                                              |               |               |               |               |               |               |               |               |               |               |               |               |               |               |               |               |                                                 |               |               |               |               |               |               |               |               |               |               |               |               |               |               |               |               |                          |               |               |               |               |               |               |               |               |               |               |               |               |               |               |               |               |                                           |               |               |               |               |               |               |               |               |               |               |               |               |               |               |               |               |                          |               |               |               |               |               |               |               |               |               |               |               |               |               |               |               |               |                                      |               |               |               |               |               |               |               |               |               |               |               |               |               |               |               |               |                                              |               |               |               |               |               |               |               |               |               |               |               |               |               |               |               |               |                                           |            |            |             |             |             |             |             |             |             |             |             |             |               |               |               |               |                                                 |               |               |               |               |               |               |               |               |               |               |               |               |               |               |               |               |                                              |               |               |               |               |               |               |               |               |               |               |               |               |               |               |               |               |                                             |               |               |             |             |             |             |             |             |               |               |               |               |               |               |               |               |                                            |               |               |               |               |               |               |               |               |             |             |               |               |               |               |               |               |                                                 |             |             |             |             |             |             |             |             |             |             |             |             |               |               |               |               |                                           |               |               |             |             |             |             |             |             |               |               |               |               |               |               |               |               |                          |               |               |               |               |               |               |               |               |               |               |               |               |               |               |               |               |                                      |               |               |               |               |               |               |               |               |               |               |               |               |               |               |               |               |                                              |             |             |             |             |             |             |             |             |             |             |            |            |               |               |               |               |                          |               |               |               |               |               |               |               |               |               |               |               |               |               |               |               |               |                                                 |               |               |               |               |               |               |               |               |               |               |               |               |               |               |               |               |                                              |             |             |             |             |             |             |             |             |             |             |               |               |               |               |               |               |                      |               |               |             |             |             |             |             |             |               |               |               |               |               |               |               |               |                                                 |               |               |               |               |               |               |               |               |             |             |               |               |               |               |               |               |                                        |             |             |             |             |             |             |             |             |             |             |               |               |               |               |               |               |                                           |               |               |             |             |             |             |             |             |               |               |               |               |               |               |               |               |                          |               |               |               |               |               |               |               |               |               |               |               |               |               |               |               |               |              |               |               |               |               |               |               |               |               |               |               |               |               |               |               |               |               |                                             |           |           |            |            |            |            |            |            |           |           |           |           |            |            |            |            |                          |               |               |               |               |               |               |               |               |               |               |               |               |               |               |               |               |                                                 |               |               |               |               |               |               |               |               |               |               |               |               |               |               |               |               |                                             |             |             |             |             |             |             |             |             |             |             |               |               |               |               |               |               |                      |            |            |            |            |            |            |            |            |            |            |            |            |            |              |              |              |                                                 |           |           |           |           |           |           |           |           |           |           |            |            |            |            |            |            |         |             |             |             |             |             |             |             |             |             |             |               |               |               |               |               |               |                      |           |           |           |           |           |           |           |           |           |           |           |           |            |            |            |  |
| PE without DVT                                  | 611 (19.1%)           | 611 (19.1%)           | 900 (20.7%)           | 900 (20.7%)           | 900 (20.7%)           | 900 (20.7%)           | 900 (20.7%)           | 900 (20.7%)           | 966 (22.5%)           | 966 (22.5%)           | 1,000 (16.4%)         | 1,000 (16.4%)         | 3,157 (17.7%)          | 3,157 (17.7%)          | 3,157 (17.7%)          | 3,157 (17.7%)          |                                            |               |               |               |               |               |               |               |               |               |               |               |               |               |               |               |               |                      |               |               |               |               |               |               |               |               |               |               |               |               |               |               |               |               |                                           |               |               |               |               |               |               |               |               |               |               |               |               |               |               |               |               |                             |               |               |               |               |               |               |               |               |               |               |               |               |               |               |               |               |                            |             |             |               |               |               |               |               |               |               |               |               |               |               |               |               |               |                                      |               |               |               |               |               |               |               |               |               |               |               |               |                |                |                |                |                                              |               |               |               |               |               |               |               |               |               |               |               |               |               |               |               |               |                                            |               |               |               |               |               |               |               |               |               |               |               |               |               |               |               |               |                                              |               |               |               |               |               |               |               |               |               |               |               |               |                |                |                |                |                                           |               |               |               |               |               |               |               |               |               |               |               |               |               |               |               |               |                          |               |               |               |               |               |               |               |               |               |               |               |               |               |               |               |               |                                            |             |             |               |               |               |               |               |               |               |               |               |               |               |               |               |               |                             |               |               |               |               |               |               |               |               |               |               |               |               |               |               |               |               |                                           |               |               |               |               |               |               |               |               |               |               |               |               |               |               |               |               |                                      |               |               |               |               |               |               |               |               |               |               |               |               |               |               |               |               |                                              |               |               |               |               |               |               |               |               |               |               |               |               |               |               |               |               |                                             |               |               |               |               |               |               |               |               |               |               |               |               |               |               |               |               |                                            |               |               |               |               |               |               |               |               |               |               |               |               |               |               |               |               |                                                 |             |             |             |             |             |             |             |             |            |            |            |            |              |              |              |              |                                              |               |               |               |               |               |               |               |               |               |               |               |               |               |               |               |               |                                                 |               |               |               |               |               |               |               |               |               |               |               |               |               |               |               |               |                          |               |               |               |               |               |               |               |               |               |               |               |               |               |               |               |               |                                           |               |               |               |               |               |               |               |               |               |               |               |               |               |               |               |               |                          |               |               |               |               |               |               |               |               |               |               |               |               |               |               |               |               |                                      |               |               |               |               |               |               |               |               |               |               |               |               |               |               |               |               |                                              |               |               |               |               |               |               |               |               |               |               |               |               |               |               |               |               |                                           |            |            |             |             |             |             |             |             |             |             |             |             |               |               |               |               |                                                 |               |               |               |               |               |               |               |               |               |               |               |               |               |               |               |               |                                              |               |               |               |               |               |               |               |               |               |               |               |               |               |               |               |               |                                             |               |               |             |             |             |             |             |             |               |               |               |               |               |               |               |               |                                            |               |               |               |               |               |               |               |               |             |             |               |               |               |               |               |               |                                                 |             |             |             |             |             |             |             |             |             |             |             |             |               |               |               |               |                                           |               |               |             |             |             |             |             |             |               |               |               |               |               |               |               |               |                          |               |               |               |               |               |               |               |               |               |               |               |               |               |               |               |               |                                      |               |               |               |               |               |               |               |               |               |               |               |               |               |               |               |               |                                              |             |             |             |             |             |             |             |             |             |             |            |            |               |               |               |               |                          |               |               |               |               |               |               |               |               |               |               |               |               |               |               |               |               |                                                 |               |               |               |               |               |               |               |               |               |               |               |               |               |               |               |               |                                              |             |             |             |             |             |             |             |             |             |             |               |               |               |               |               |               |                      |               |               |             |             |             |             |             |             |               |               |               |               |               |               |               |               |                                                 |               |               |               |               |               |               |               |               |             |             |               |               |               |               |               |               |                                        |             |             |             |             |             |             |             |             |             |             |               |               |               |               |               |               |                                           |               |               |             |             |             |             |             |             |               |               |               |               |               |               |               |               |                          |               |               |               |               |               |               |               |               |               |               |               |               |               |               |               |               |              |               |               |               |               |               |               |               |               |               |               |               |               |               |               |               |               |                                             |           |           |            |            |            |            |            |            |           |           |           |           |            |            |            |            |                          |               |               |               |               |               |               |               |               |               |               |               |               |               |               |               |               |                                                 |               |               |               |               |               |               |               |               |               |               |               |               |               |               |               |               |                                             |             |             |             |             |             |             |             |             |             |             |               |               |               |               |               |               |                      |            |            |            |            |            |            |            |            |            |            |            |            |            |              |              |              |                                                 |           |           |           |           |           |           |           |           |           |           |            |            |            |            |            |            |         |             |             |             |             |             |             |             |             |             |             |               |               |               |               |               |               |                      |           |           |           |           |           |           |           |           |           |           |           |           |            |            |            |  |
| DVT only                                        | 1,342 (42.3%)         | 1,342 (42.3%)         | 1,944 (45.0%)         | 1,944 (45.0%)         | 1,944 (45.0%)         | 1,944 (45.0%)         | 1,944 (45.0%)         | 1,944 (45.0%)         | 2,044 (47.0%)         | 2,044 (47.0%)         | 2,000 (33.8%)         | 2,000 (33.8%)         | 7,015 (39.1%)          | 7,015 (39.1%)          | 7,015 (39.1%)          | 7,015 (39.1%)          |                                            |               |               |               |               |               |               |               |               |               |               |               |               |               |               |               |               |                      |               |               |               |               |               |               |               |               |               |               |               |               |               |               |               |               |                                           |               |               |               |               |               |               |               |               |               |               |               |               |               |               |               |               |                             |               |               |               |               |               |               |               |               |               |               |               |               |               |               |               |               |                            |             |             |               |               |               |               |               |               |               |               |               |               |               |               |               |               |                                      |               |               |               |               |               |               |               |               |               |               |               |               |                |                |                |                |                                              |               |               |               |               |               |               |               |               |               |               |               |               |               |               |               |               |                                            |               |               |               |               |               |               |               |               |               |               |               |               |               |               |               |               |                                              |               |               |               |               |               |               |               |               |               |               |               |               |                |                |                |                |                                           |               |               |               |               |               |               |               |               |               |               |               |               |               |               |               |               |                          |               |               |               |               |               |               |               |               |               |               |               |               |               |               |               |               |                                            |             |             |               |               |               |               |               |               |               |               |               |               |               |               |               |               |                             |               |               |               |               |               |               |               |               |               |               |               |               |               |               |               |               |                                           |               |               |               |               |               |               |               |               |               |               |               |               |               |               |               |               |                                      |               |               |               |               |               |               |               |               |               |               |               |               |               |               |               |               |                                              |               |               |               |               |               |               |               |               |               |               |               |               |               |               |               |               |                                             |               |               |               |               |               |               |               |               |               |               |               |               |               |               |               |               |                                            |               |               |               |               |               |               |               |               |               |               |               |               |               |               |               |               |                                                 |             |             |             |             |             |             |             |             |            |            |            |            |              |              |              |              |                                              |               |               |               |               |               |               |               |               |               |               |               |               |               |               |               |               |                                                 |               |               |               |               |               |               |               |               |               |               |               |               |               |               |               |               |                          |               |               |               |               |               |               |               |               |               |               |               |               |               |               |               |               |                                           |               |               |               |               |               |               |               |               |               |               |               |               |               |               |               |               |                          |               |               |               |               |               |               |               |               |               |               |               |               |               |               |               |               |                                      |               |               |               |               |               |               |               |               |               |               |               |               |               |               |               |               |                                              |               |               |               |               |               |               |               |               |               |               |               |               |               |               |               |               |                                           |            |            |             |             |             |             |             |             |             |             |             |             |               |               |               |               |                                                 |               |               |               |               |               |               |               |               |               |               |               |               |               |               |               |               |                                              |               |               |               |               |               |               |               |               |               |               |               |               |               |               |               |               |                                             |               |               |             |             |             |             |             |             |               |               |               |               |               |               |               |               |                                            |               |               |               |               |               |               |               |               |             |             |               |               |               |               |               |               |                                                 |             |             |             |             |             |             |             |             |             |             |             |             |               |               |               |               |                                           |               |               |             |             |             |             |             |             |               |               |               |               |               |               |               |               |                          |               |               |               |               |               |               |               |               |               |               |               |               |               |               |               |               |                                      |               |               |               |               |               |               |               |               |               |               |               |               |               |               |               |               |                                              |             |             |             |             |             |             |             |             |             |             |            |            |               |               |               |               |                          |               |               |               |               |               |               |               |               |               |               |               |               |               |               |               |               |                                                 |               |               |               |               |               |               |               |               |               |               |               |               |               |               |               |               |                                              |             |             |             |             |             |             |             |             |             |             |               |               |               |               |               |               |                      |               |               |             |             |             |             |             |             |               |               |               |               |               |               |               |               |                                                 |               |               |               |               |               |               |               |               |             |             |               |               |               |               |               |               |                                        |             |             |             |             |             |             |             |             |             |             |               |               |               |               |               |               |                                           |               |               |             |             |             |             |             |             |               |               |               |               |               |               |               |               |                          |               |               |               |               |               |               |               |               |               |               |               |               |               |               |               |               |              |               |               |               |               |               |               |               |               |               |               |               |               |               |               |               |               |                                             |           |           |            |            |            |            |            |            |           |           |           |           |            |            |            |            |                          |               |               |               |               |               |               |               |               |               |               |               |               |               |               |               |               |                                                 |               |               |               |               |               |               |               |               |               |               |               |               |               |               |               |               |                                             |             |             |             |             |             |             |             |             |             |             |               |               |               |               |               |               |                      |            |            |            |            |            |            |            |            |            |            |            |            |            |              |              |              |                                                 |           |           |           |           |           |           |           |           |           |           |            |            |            |            |            |            |         |             |             |             |             |             |             |             |             |             |             |               |               |               |               |               |               |                      |           |           |           |           |           |           |           |           |           |           |           |           |            |            |            |  |
| Prevented atherothrombosis                      | 798 (24.1%)           | 798 (24.1%)           | 1,010 (23.2%)         | 1,010 (23.2%)         | 1,010 (23.2%)         | 1,010 (23.2%)         | 1,010 (23.2%)         | 1,010 (23.2%)         | 892 (21.0%)           | 892 (21.0%)           | 1,369 (23.0%)         | 1,369 (23.0%)         | 4,969 (27.8%)          | 4,969 (27.8%)          | 4,969 (27.8%)          | 4,969 (27.8%)          |                                            |               |               |               |               |               |               |               |               |               |               |               |               |               |               |               |               |                      |               |               |               |               |               |               |               |               |               |               |               |               |               |               |               |               |                                           |               |               |               |               |               |               |               |               |               |               |               |               |               |               |               |               |                             |               |               |               |               |               |               |               |               |               |               |               |               |               |               |               |               |                            |             |             |               |               |               |               |               |               |               |               |               |               |               |               |               |               |                                      |               |               |               |               |               |               |               |               |               |               |               |               |                |                |                |                |                                              |               |               |               |               |               |               |               |               |               |               |               |               |               |               |               |               |                                            |               |               |               |               |               |               |               |               |               |               |               |               |               |               |               |               |                                              |               |               |               |               |               |               |               |               |               |               |               |               |                |                |                |                |                                           |               |               |               |               |               |               |               |               |               |               |               |               |               |               |               |               |                          |               |               |               |               |               |               |               |               |               |               |               |               |               |               |               |               |                                            |             |             |               |               |               |               |               |               |               |               |               |               |               |               |               |               |                             |               |               |               |               |               |               |               |               |               |               |               |               |               |               |               |               |                                           |               |               |               |               |               |               |               |               |               |               |               |               |               |               |               |               |                                      |               |               |               |               |               |               |               |               |               |               |               |               |               |               |               |               |                                              |               |               |               |               |               |               |               |               |               |               |               |               |               |               |               |               |                                             |               |               |               |               |               |               |               |               |               |               |               |               |               |               |               |               |                                            |               |               |               |               |               |               |               |               |               |               |               |               |               |               |               |               |                                                 |             |             |             |             |             |             |             |             |            |            |            |            |              |              |              |              |                                              |               |               |               |               |               |               |               |               |               |               |               |               |               |               |               |               |                                                 |               |               |               |               |               |               |               |               |               |               |               |               |               |               |               |               |                          |               |               |               |               |               |               |               |               |               |               |               |               |               |               |               |               |                                           |               |               |               |               |               |               |               |               |               |               |               |               |               |               |               |               |                          |               |               |               |               |               |               |               |               |               |               |               |               |               |               |               |               |                                      |               |               |               |               |               |               |               |               |               |               |               |               |               |               |               |               |                                              |               |               |               |               |               |               |               |               |               |               |               |               |               |               |               |               |                                           |            |            |             |             |             |             |             |             |             |             |             |             |               |               |               |               |                                                 |               |               |               |               |               |               |               |               |               |               |               |               |               |               |               |               |                                              |               |               |               |               |               |               |               |               |               |               |               |               |               |               |               |               |                                             |               |               |             |             |             |             |             |             |               |               |               |               |               |               |               |               |                                            |               |               |               |               |               |               |               |               |             |             |               |               |               |               |               |               |                                                 |             |             |             |             |             |             |             |             |             |             |             |             |               |               |               |               |                                           |               |               |             |             |             |             |             |             |               |               |               |               |               |               |               |               |                          |               |               |               |               |               |               |               |               |               |               |               |               |               |               |               |               |                                      |               |               |               |               |               |               |               |               |               |               |               |               |               |               |               |               |                                              |             |             |             |             |             |             |             |             |             |             |            |            |               |               |               |               |                          |               |               |               |               |               |               |               |               |               |               |               |               |               |               |               |               |                                                 |               |               |               |               |               |               |               |               |               |               |               |               |               |               |               |               |                                              |             |             |             |             |             |             |             |             |             |             |               |               |               |               |               |               |                      |               |               |             |             |             |             |             |             |               |               |               |               |               |               |               |               |                                                 |               |               |               |               |               |               |               |               |             |             |               |               |               |               |               |               |                                        |             |             |             |             |             |             |             |             |             |             |               |               |               |               |               |               |                                           |               |               |             |             |             |             |             |             |               |               |               |               |               |               |               |               |                          |               |               |               |               |               |               |               |               |               |               |               |               |               |               |               |               |              |               |               |               |               |               |               |               |               |               |               |               |               |               |               |               |               |                                             |           |           |            |            |            |            |            |            |           |           |           |           |            |            |            |            |                          |               |               |               |               |               |               |               |               |               |               |               |               |               |               |               |               |                                                 |               |               |               |               |               |               |               |               |               |               |               |               |               |               |               |               |                                             |             |             |             |             |             |             |             |             |             |             |               |               |               |               |               |               |                      |            |            |            |            |            |            |            |            |            |            |            |            |            |              |              |              |                                                 |           |           |           |           |           |           |           |           |           |           |            |            |            |            |            |            |         |             |             |             |             |             |             |             |             |             |             |               |               |               |               |               |               |                      |           |           |           |           |           |           |           |           |           |           |           |           |            |            |            |  |
| Prevented thromboembolism                       | 2,520 (75.9%)         | 2,520 (75.9%)         | 3,348 (76.8%)         | 3,348 (76.8%)         | 3,348 (76.8%)         | 3,348 (76.8%)         | 3,348 (76.8%)         | 3,348 (76.8%)         | 3,551 (79.0%)         | 3,551 (79.0%)         | 4,592 (77.0%)         | 4,592 (77.0%)         | 13,809 (77.2%)         | 13,809 (77.2%)         | 13,809 (77.2%)         | 13,809 (77.2%)         |                                            |               |               |               |               |               |               |               |               |               |               |               |               |               |               |               |               |                      |               |               |               |               |               |               |               |               |               |               |               |               |               |               |               |               |                                           |               |               |               |               |               |               |               |               |               |               |               |               |               |               |               |               |                             |               |               |               |               |               |               |               |               |               |               |               |               |               |               |               |               |                            |             |             |               |               |               |               |               |               |               |               |               |               |               |               |               |               |                                      |               |               |               |               |               |               |               |               |               |               |               |               |                |                |                |                |                                              |               |               |               |               |               |               |               |               |               |               |               |               |               |               |               |               |                                            |               |               |               |               |               |               |               |               |               |               |               |               |               |               |               |               |                                              |               |               |               |               |               |               |               |               |               |               |               |               |                |                |                |                |                                           |               |               |               |               |               |               |               |               |               |               |               |               |               |               |               |               |                          |               |               |               |               |               |               |               |               |               |               |               |               |               |               |               |               |                                            |             |             |               |               |               |               |               |               |               |               |               |               |               |               |               |               |                             |               |               |               |               |               |               |               |               |               |               |               |               |               |               |               |               |                                           |               |               |               |               |               |               |               |               |               |               |               |               |               |               |               |               |                                      |               |               |               |               |               |               |               |               |               |               |               |               |               |               |               |               |                                              |               |               |               |               |               |               |               |               |               |               |               |               |               |               |               |               |                                             |               |               |               |               |               |               |               |               |               |               |               |               |               |               |               |               |                                            |               |               |               |               |               |               |               |               |               |               |               |               |               |               |               |               |                                                 |             |             |             |             |             |             |             |             |            |            |            |            |              |              |              |              |                                              |               |               |               |               |               |               |               |               |               |               |               |               |               |               |               |               |                                                 |               |               |               |               |               |               |               |               |               |               |               |               |               |               |               |               |                          |               |               |               |               |               |               |               |               |               |               |               |               |               |               |               |               |                                           |               |               |               |               |               |               |               |               |               |               |               |               |               |               |               |               |                          |               |               |               |               |               |               |               |               |               |               |               |               |               |               |               |               |                                      |               |               |               |               |               |               |               |               |               |               |               |               |               |               |               |               |                                              |               |               |               |               |               |               |               |               |               |               |               |               |               |               |               |               |                                           |            |            |             |             |             |             |             |             |             |             |             |             |               |               |               |               |                                                 |               |               |               |               |               |               |               |               |               |               |               |               |               |               |               |               |                                              |               |               |               |               |               |               |               |               |               |               |               |               |               |               |               |               |                                             |               |               |             |             |             |             |             |             |               |               |               |               |               |               |               |               |                                            |               |               |               |               |               |               |               |               |             |             |               |               |               |               |               |               |                                                 |             |             |             |             |             |             |             |             |             |             |             |             |               |               |               |               |                                           |               |               |             |             |             |             |             |             |               |               |               |               |               |               |               |               |                          |               |               |               |               |               |               |               |               |               |               |               |               |               |               |               |               |                                      |               |               |               |               |               |               |               |               |               |               |               |               |               |               |               |               |                                              |             |             |             |             |             |             |             |             |             |             |            |            |               |               |               |               |                          |               |               |               |               |               |               |               |               |               |               |               |               |               |               |               |               |                                                 |               |               |               |               |               |               |               |               |               |               |               |               |               |               |               |               |                                              |             |             |             |             |             |             |             |             |             |             |               |               |               |               |               |               |                      |               |               |             |             |             |             |             |             |               |               |               |               |               |               |               |               |                                                 |               |               |               |               |               |               |               |               |             |             |               |               |               |               |               |               |                                        |             |             |             |             |             |             |             |             |             |             |               |               |               |               |               |               |                                           |               |               |             |             |             |             |             |             |               |               |               |               |               |               |               |               |                          |               |               |               |               |               |               |               |               |               |               |               |               |               |               |               |               |              |               |               |               |               |               |               |               |               |               |               |               |               |               |               |               |               |                                             |           |           |            |            |            |            |            |            |           |           |           |           |            |            |            |            |                          |               |               |               |               |               |               |               |               |               |               |               |               |               |               |               |               |                                                 |               |               |               |               |               |               |               |               |               |               |               |               |               |               |               |               |                                             |             |             |             |             |             |             |             |             |             |             |               |               |               |               |               |               |                      |            |            |            |            |            |            |            |            |            |            |            |            |            |              |              |              |                                                 |           |           |           |           |           |           |           |           |           |           |            |            |            |            |            |            |         |             |             |             |             |             |             |             |             |             |             |               |               |               |               |               |               |                      |           |           |           |           |           |           |           |           |           |           |           |           |            |            |            |  |
| Age, n (%)                                      |                       |                       |                       |                       |                       |                       |                       |                       |                       |                       |                       |                       |                        |                        |                        |                        | Mean (SD)                                  | 71.5 (13.3)   | 71.5 (13.3)   | 57.8 (15.8)   | 57.8 (15.8)   | 57.8 (15.8)   | 57.8 (15.8)   | 57.8 (15.8)   | 57.8 (15.8)   | 65.2 (15.5)   | 65.2 (15.5)   | 51.4 (12.1)   | 51.4 (12.1)   | 60.0 (16.0)   | 60.0 (16.0)   | 60.0 (16.0)   | 60.0 (16.0)   | Median               | 72            | 72            | 57            | 57            | 57            | 57            | 57            | 57            | 67            | 67            | 53            | 53            | 60            | 60            | 60            | 60            | Age (years), n (%)                        |               |               |               |               |               |               |               |               |               |               |               |               |               |               |               |               | 18-49 years                 | 186 (5.6%)    | 186 (5.6%)    | 1,221 (28.1%) | 1,221 (28.1%) | 1,221 (28.1%) | 1,221 (28.1%) | 1,221 (28.1%) | 1,221 (28.1%) | 732 (17.3%)   | 732 (17.3%)   | 2,389 (38.4%) | 2,389 (38.4%) | 4,428 (24.8%) | 4,428 (24.8%) | 4,428 (24.8%) | 4,428 (24.8%) | 50-64 years                | 663 (20.0%) | 663 (20.0%) | 1,902 (43.7%) | 1,902 (43.7%) | 1,902 (43.7%) | 1,902 (43.7%) | 1,902 (43.7%) | 1,902 (43.7%) | 1,169 (27.6%) | 1,169 (27.6%) | 3,140 (52.7%) | 3,140 (52.7%) | 6,874 (38.7%) | 6,874 (38.7%) | 6,874 (38.7%) | 6,874 (38.7%) | 65-74 years                          | 1,162 (35.0%) | 1,162 (35.0%) | 510 (11.7%)   | 510 (11.7%)   | 510 (11.7%)   | 510 (11.7%)   | 510 (11.7%)   | 510 (11.7%)   | 1,059 (25.0%) | 1,059 (25.0%) | 411 (6.9%)    | 411 (6.9%)    | 3,142 (17.6%)  | 3,142 (17.6%)  | 3,142 (17.6%)  | 3,142 (17.6%)  | ≥75 years                                    | 1,307 (39.4%) | 1,307 (39.4%) | 719 (16.5%)   | 719 (16.5%)   | 719 (16.5%)   | 719 (16.5%)   | 719 (16.5%)   | 719 (16.5%)   | 1,283 (30.2%) | 1,283 (30.2%) | 121 (2.0%)    | 121 (2.0%)    | 3,430 (19.2%) | 3,430 (19.2%) | 3,430 (19.2%) | 3,430 (19.2%) | Missing                                    | —             | —             | —             | —             | —             | —             | —             | —             | —             | —             | —             | —             | —             | —             | —             | —             | Sex, n (%)                                   |               |               |               |               |               |               |               |               |               |               |               |               |                |                |                |                | Male                                      | 1,417 (42.7%) | 1,417 (42.7%) | 2,327 (53.4%) | 2,327 (53.4%) | 2,327 (53.4%) | 2,327 (53.4%) | 2,327 (53.4%) | 2,327 (53.4%) | 2,046 (48.7%) | 2,046 (48.7%) | 3,461 (58.1%) | 3,461 (58.1%) | 9,279 (51.9%) | 9,279 (51.9%) | 9,279 (51.9%) | 9,279 (51.9%) | Female                   | 1,901 (57.3%) | 1,901 (57.3%) | 2,029 (46.6%) | 2,029 (46.6%) | 2,029 (46.6%) | 2,029 (46.6%) | 2,029 (46.6%) | 2,029 (46.6%) | 2,199 (51.3%) | 2,199 (51.3%) | 2,499 (41.9%) | 2,499 (41.9%) | 8,599 (48.1%) | 8,599 (48.1%) | 8,599 (48.1%) | 8,599 (48.1%) | Missing                                    | —           | —           | —             | —             | —             | —             | —             | —             | —             | —             | —             | —             | —             | —             | —             | —             | US Geographic Region, n (%) |               |               |               |               |               |               |               |               |               |               |               |               |               |               |               |               | East                                      | 72 (2.2%)     | 72 (2.2%)     | 724 (16.6%)   | 724 (16.6%)   | 724 (16.6%)   | 724 (16.6%)   | 724 (16.6%)   | 724 (16.6%)   | 402 (9.5%)    | 402 (9.5%)    | 1,080 (18.1%) | 1,080 (18.1%) | 2,278 (12.7%) | 2,278 (12.7%) | 2,278 (12.7%) | 2,278 (12.7%) | Midwest                              | 693 (22.2%)   | 693 (22.2%)   | 2,097 (48.2%) | 2,097 (48.2%) | 2,097 (48.2%) | 2,097 (48.2%) | 2,097 (48.2%) | 2,097 (48.2%) | 1,175 (27.3%) | 1,175 (27.3%) | 1,491 (25.9%) | 1,491 (25.9%) | 5,347 (30.0%) | 5,347 (30.0%) | 5,347 (30.0%) | 5,347 (30.0%) | South                                        | 2,065 (66.0%) | 2,065 (66.0%) | 2,065 (47.5%) | 2,065 (47.5%) | 2,065 (47.5%) | 2,065 (47.5%) | 2,065 (47.5%) | 2,065 (47.5%) | 1,856 (42.8%) | 1,856 (42.8%) | 2,126 (36.5%) | 2,126 (36.5%) | 7,372 (41.3%) | 7,372 (41.3%) | 7,372 (41.3%) | 7,372 (41.3%) | West                                        | 265 (8.0%)    | 265 (8.0%)    | 480 (11.0%)   | 480 (11.0%)   | 480 (11.0%)   | 480 (11.0%)   | 480 (11.0%)   | 480 (11.0%)   | 856 (20.2%)   | 856 (20.2%)   | 588 (10.3%)   | 588 (10.3%)   | 2,189 (12.2%) | 2,189 (12.2%) | 2,189 (12.2%) | 2,189 (12.2%) | Other                                      | —             | —             | 15 (0.3%)     | 15 (0.3%)     | 15 (0.3%)     | 15 (0.3%)     | 15 (0.3%)     | 15 (0.3%)     | —             | —             | —             | —             | 15 (0.1%)     | 15 (0.1%)     | 15 (0.1%)     | 15 (0.1%)     | Missing                                         | —           | —           | —           | —           | —           | —           | —           | —           | —          | —          | —          | —          | —            | —            | —            | —            | Comorbidity Profile                          |               |               |               |               |               |               |               |               |               |               |               |               |               |               |               |               | Deyo-Charlson Comorbidity Index, mean (SD)      | 2.0 (2.1)     | 2.1 (2.1)     | 0.7 (1.2)     | 0.6 (1.2)     | 0.6 (1.2)     | 0.6 (1.2)     | 0.6 (1.2)     | 0.6 (1.2)     | 1.3 (1.8)     | 1.3 (1.8)     | 0.6 (1.2)     | 0.6 (1.2)     | 1.0 (1.7)     | 1.0 (1.7)     | 1.0 (1.7)     | 1.0 (1.7)     | Comorbidities, n (%)     |               |               |               |               |               |               |               |               |               |               |               |               |               |               |               |               | Acquired immunodeficiency syndrome (AIDS) | 11 (0.4%)     | 11 (0.4%)     | 10 (0.2%)     | 11 (0.3%)     | 11 (0.3%)     | 11 (0.3%)     | 11 (0.3%)     | 11 (0.3%)     | 19 (0.4%)     | 19 (0.4%)     | 27 (0.5%)     | 26 (0.4%)     | 64 (0.4%)     | 64 (0.4%)     | 64 (0.4%)     | 64 (0.4%)     | Alcohol abuse            | 148 (4.5%)    | 148 (4.5%)    | 87 (2.0%)     | 86 (2.0%)     | 86 (2.0%)     | 86 (2.0%)     | 86 (2.0%)     | 86 (2.0%)     | 106 (2.4%)    | 106 (2.4%)    | 205 (3.4%)    | 205 (3.4%)    | 591 (3.3%)    | 591 (3.3%)    | 591 (3.3%)    | 591 (3.3%)    | Anemia                               | 811 (24.4%)   | 811 (24.4%)   | 795 (18.2%)   | 795 (18.2%)   | 795 (18.2%)   | 795 (18.2%)   | 795 (18.2%)   | 795 (18.2%)   | 701 (16.5%)   | 701 (16.5%)   | 686 (11.5%)   | 686 (11.5%)   | 2,562 (14.3%) | 2,562 (14.3%) | 2,562 (14.3%) | 2,562 (14.3%) | Bleeding                                     | 66 (2.0%)     | 67 (2.1%)     | 17 (0.4%)     | 16 (0.4%)     | 16 (0.4%)     | 16 (0.4%)     | 16 (0.4%)     | 16 (0.4%)     | 65 (1.5%)     | 65 (1.5%)     | 81 (1.4%)     | 77 (1.3%)     | 261 (1.5%)    | 261 (1.5%)    | 261 (1.5%)    | 261 (1.5%)    | Central venous catheter                   | 152 (4.6%) | 137 (4.1%) | 99 (2.3%)   | 99 (2.3%)   | 99 (2.3%)   | 99 (2.3%)   | 99 (2.3%)   | 99 (2.3%)   | 181 (4.2%)  | 181 (4.2%)  | 255 (4.3%)  | 229 (3.9%)  | 689 (3.9%)    | 689 (3.9%)    | 689 (3.9%)    | 689 (3.9%)    | Cerebrovascular disease (stroke/TIA)            | 406 (12.4%)   | 406 (12.4%)   | 276 (6.3%)    | 276 (6.3%)    | 276 (6.3%)    | 276 (6.3%)    | 276 (6.3%)    | 276 (6.3%)    | 317 (7.3%)    | 317 (7.3%)    | 323 (5.5%)    | 323 (5.5%)    | 1,242 (6.9%)  | 1,242 (6.9%)  | 1,242 (6.9%)  | 1,242 (6.9%)  | Chronic obstructive pulmonary disease (COPD) | 876 (26.4%)   | 876 (26.4%)   | 888 (20.0%)   | 888 (20.0%)   | 888 (20.0%)   | 888 (20.0%)   | 888 (20.0%)   | 888 (20.0%)   | 598 (13.8%)   | 598 (13.8%)   | 398 (6.7%)    | 398 (6.7%)    | 2,155 (12.1%) | 2,155 (12.1%) | 2,155 (12.1%) | 2,155 (12.1%) | Coagulopathy                                | 38 (1.1%)     | 49 (1.5%)     | 38 (0.9%)   | 30 (0.7%)   | 30 (0.7%)   | 30 (0.7%)   | 30 (0.7%)   | 30 (0.7%)   | 56 (1.3%)     | 56 (1.3%)     | 51 (0.9%)     | 51 (0.9%)     | 221 (1.2%)    | 221 (1.2%)    | 221 (1.2%)    | 221 (1.2%)    | Congestive heart failure                   | 1,127 (34.0%) | 1,127 (34.0%) | 1,114 (25.0%) | 1,114 (25.0%) | 1,114 (25.0%) | 1,114 (25.0%) | 1,114 (25.0%) | 1,114 (25.0%) | 924 (21.2%) | 924 (21.2%) | 874 (14.7%)   | 874 (14.7%)   | 3,466 (19.4%) | 3,466 (19.4%) | 3,466 (19.4%) | 3,466 (19.4%) | Ischemic heart/coronary artery disease          | 217 (7.1%)  | 184 (5.5%)  | 541 (12.2%) | 441 (10.2%) | 441 (10.2%) | 441 (10.2%) | 441 (10.2%) | 441 (10.2%) | 152 (3.5%)  | 152 (3.5%)  | 25 (0.4%)   | 21 (0.4%)   | 508 (2.8%)    | 425 (2.4%)    | 508 (2.8%)    | 425 (2.4%)    | Dementia                                  | 1,269 (39.4%) | 1,269 (39.4%) | 942 (21.6%) | 942 (21.6%) | 942 (21.6%) | 942 (21.6%) | 942 (21.6%) | 942 (21.6%) | 1,100 (25.0%) | 1,100 (25.0%) | 1,040 (17.6%) | 1,040 (17.6%) | 4,342 (24.3%) | 4,342 (24.3%) | 4,342 (24.3%) | 4,342 (24.3%) | Diabetes                 | 708 (22.1%)   | 708 (22.1%)   | 1,113 (25.3%) | 1,113 (25.3%) | 1,113 (25.3%) | 1,113 (25.3%) | 1,113 (25.3%) | 1,113 (25.3%) | 978 (22.5%)   | 978 (22.5%)   | 1,031 (17.8%) | 1,031 (17.8%) | 3,271 (18.3%) | 3,271 (18.3%) | 3,271 (18.3%) | 3,271 (18.3%) | Disability                           | 170 (5.1%)    | 170 (5.1%)    | 436 (10.0%)   | 436 (10.0%)   | 436 (10.0%)   | 436 (10.0%)   | 436 (10.0%)   | 436 (10.0%)   | 323 (7.4%)    | 323 (7.4%)    | 371 (6.4%)    | 371 (6.4%)    | 1,669 (9.3%)  | 1,669 (9.3%)  | 1,669 (9.3%)  | 1,669 (9.3%)  | Fractures involving the lower extremities    | 76 (2.3%)   | 76 (2.3%)   | 217 (5.0%)  | 217 (5.0%)  | 217 (5.0%)  | 217 (5.0%)  | 217 (5.0%)  | 217 (5.0%)  | 44 (1.0%)   | 44 (1.0%)   | 43 (0.8%)  | 43 (0.8%)  | 191 (1.1%)    | 191 (1.1%)    | 191 (1.1%)    | 191 (1.1%)    | Hemiplegia or paraplegia | 2,150 (64.8%) | 2,150 (64.8%) | 1,747 (40.1%) | 1,668 (38.3%) | 1,668 (38.3%) | 1,668 (38.3%) | 1,668 (38.3%) | 1,668 (38.3%) | 2,120 (50.0%) | 2,120 (50.0%) | 1,907 (32.0%) | 1,907 (32.0%) | 7,875 (44.0%) | 7,875 (44.0%) | 7,875 (44.0%) | 7,875 (44.0%) | Hypertension                                    | 2,680 (80.8%) | 2,680 (80.8%) | 2,648 (79.6%) | 2,648 (79.6%) | 2,648 (79.6%) | 2,648 (79.6%) | 2,648 (79.6%) | 2,648 (79.6%) | 2,499 (58.9%) | 2,499 (58.9%) | 2,054 (34.3%) | 2,054 (34.3%) | 9,799 (54.8%) | 9,799 (54.8%) | 9,799 (54.8%) | 9,799 (54.8%) | Hypertension<br>inflammatory bowel syndrome  | 38 (1.1%)   | 35 (1.1%)   | 32 (0.7%)   | 37 (0.8%)   | 37 (0.8%)   | 37 (0.8%)   | 37 (0.8%)   | 37 (0.8%)   | 29 (0.7%)   | 29 (0.7%)   | 80 (1.3%)     | 94 (1.6%)     | 179 (1.0%)    | 190 (1.1%)    | 190 (1.1%)    | 190 (1.1%)    | Liver disease        | 235 (7.1%)    | 246 (7.4%)    | 154 (3.5%)  | 154 (3.5%)  | 154 (3.5%)  | 154 (3.5%)  | 154 (3.5%)  | 154 (3.5%)  | 267 (6.3%)    | 267 (6.3%)    | 361 (6.1%)    | 361 (6.1%)    | 998 (5.6%)    | 1,031 (5.8%)  | 1,031 (5.8%)  | 1,031 (5.8%)  | Malignancy (excluding non-melanoma skin cancer) | 50 (1.5%)     | 46 (1.4%)     | 21 (0.5%)     | 21 (0.5%)     | 21 (0.5%)     | 21 (0.5%)     | 21 (0.5%)     | 21 (0.5%)     | 62 (1.4%)   | 62 (1.4%)   | 216 (3.7%)    | 216 (3.7%)    | 200 (1.1%)    | 200 (1.1%)    | 200 (1.1%)    | 200 (1.1%)    | Obesity                                | 859 (25.9%) | 843 (25.4%) | 565 (13.0%) | 580 (13.3%) | 580 (13.3%) | 580 (13.3%) | 580 (13.3%) | 580 (13.3%) | 859 (20.2%) | 859 (20.2%) | 1,267 (21.3%) | 1,267 (21.3%) | 3,549 (19.9%) | 3,549 (19.9%) | 3,549 (19.9%) | 3,549 (19.9%) | Peptic ulcer disease                      | 52 (1.6%)     | 46 (1.4%)     | 39 (0.9%)   | 39 (0.9%)   | 39 (0.9%)   | 39 (0.9%)   | 39 (0.9%)   | 39 (0.9%)   | 39 (0.9%)     | 39 (0.9%)     | 41 (0.7%)     | 41 (0.7%)     | 160 (0.9%)    | 154 (0.9%)    | 154 (0.9%)    |               |                          |               |               |               |               |               |               |               |               |               |               |               |               |               |               |               |               |              |               |               |               |               |               |               |               |               |               |               |               |               |               |               |               |               |                                             |           |           |            |            |            |            |            |            |           |           |           |           |            |            |            |            |                          |               |               |               |               |               |               |               |               |               |               |               |               |               |               |               |               |                                                 |               |               |               |               |               |               |               |               |               |               |               |               |               |               |               |               |                                             |             |             |             |             |             |             |             |             |             |             |               |               |               |               |               |               |                      |            |            |            |            |            |            |            |            |            |            |            |            |            |              |              |              |                                                 |           |           |           |           |           |           |           |           |           |           |            |            |            |            |            |            |         |             |             |             |             |             |             |             |             |             |             |               |               |               |               |               |               |                      |           |           |           |           |           |           |           |           |           |           |           |           |            |            |            |  |
| Mean (SD)                                       | 71.5 (13.3)           | 71.5 (13.3)           | 57.8 (15.8)           | 57.8 (15.8)           | 57.8 (15.8)           | 57.8 (15.8)           | 57.8 (15.8)           | 57.8 (15.8)           | 65.2 (15.5)           | 65.2 (15.5)           | 51.4 (12.1)           | 51.4 (12.1)           | 60.0 (16.0)            | 60.0 (16.0)            | 60.0 (16.0)            | 60.0 (16.0)            |                                            |               |               |               |               |               |               |               |               |               |               |               |               |               |               |               |               |                      |               |               |               |               |               |               |               |               |               |               |               |               |               |               |               |               |                                           |               |               |               |               |               |               |               |               |               |               |               |               |               |               |               |               |                             |               |               |               |               |               |               |               |               |               |               |               |               |               |               |               |               |                            |             |             |               |               |               |               |               |               |               |               |               |               |               |               |               |               |                                      |               |               |               |               |               |               |               |               |               |               |               |               |                |                |                |                |                                              |               |               |               |               |               |               |               |               |               |               |               |               |               |               |               |               |                                            |               |               |               |               |               |               |               |               |               |               |               |               |               |               |               |               |                                              |               |               |               |               |               |               |               |               |               |               |               |               |                |                |                |                |                                           |               |               |               |               |               |               |               |               |               |               |               |               |               |               |               |               |                          |               |               |               |               |               |               |               |               |               |               |               |               |               |               |               |               |                                            |             |             |               |               |               |               |               |               |               |               |               |               |               |               |               |               |                             |               |               |               |               |               |               |               |               |               |               |               |               |               |               |               |               |                                           |               |               |               |               |               |               |               |               |               |               |               |               |               |               |               |               |                                      |               |               |               |               |               |               |               |               |               |               |               |               |               |               |               |               |                                              |               |               |               |               |               |               |               |               |               |               |               |               |               |               |               |               |                                             |               |               |               |               |               |               |               |               |               |               |               |               |               |               |               |               |                                            |               |               |               |               |               |               |               |               |               |               |               |               |               |               |               |               |                                                 |             |             |             |             |             |             |             |             |            |            |            |            |              |              |              |              |                                              |               |               |               |               |               |               |               |               |               |               |               |               |               |               |               |               |                                                 |               |               |               |               |               |               |               |               |               |               |               |               |               |               |               |               |                          |               |               |               |               |               |               |               |               |               |               |               |               |               |               |               |               |                                           |               |               |               |               |               |               |               |               |               |               |               |               |               |               |               |               |                          |               |               |               |               |               |               |               |               |               |               |               |               |               |               |               |               |                                      |               |               |               |               |               |               |               |               |               |               |               |               |               |               |               |               |                                              |               |               |               |               |               |               |               |               |               |               |               |               |               |               |               |               |                                           |            |            |             |             |             |             |             |             |             |             |             |             |               |               |               |               |                                                 |               |               |               |               |               |               |               |               |               |               |               |               |               |               |               |               |                                              |               |               |               |               |               |               |               |               |               |               |               |               |               |               |               |               |                                             |               |               |             |             |             |             |             |             |               |               |               |               |               |               |               |               |                                            |               |               |               |               |               |               |               |               |             |             |               |               |               |               |               |               |                                                 |             |             |             |             |             |             |             |             |             |             |             |             |               |               |               |               |                                           |               |               |             |             |             |             |             |             |               |               |               |               |               |               |               |               |                          |               |               |               |               |               |               |               |               |               |               |               |               |               |               |               |               |                                      |               |               |               |               |               |               |               |               |               |               |               |               |               |               |               |               |                                              |             |             |             |             |             |             |             |             |             |             |            |            |               |               |               |               |                          |               |               |               |               |               |               |               |               |               |               |               |               |               |               |               |               |                                                 |               |               |               |               |               |               |               |               |               |               |               |               |               |               |               |               |                                              |             |             |             |             |             |             |             |             |             |             |               |               |               |               |               |               |                      |               |               |             |             |             |             |             |             |               |               |               |               |               |               |               |               |                                                 |               |               |               |               |               |               |               |               |             |             |               |               |               |               |               |               |                                        |             |             |             |             |             |             |             |             |             |             |               |               |               |               |               |               |                                           |               |               |             |             |             |             |             |             |               |               |               |               |               |               |               |               |                          |               |               |               |               |               |               |               |               |               |               |               |               |               |               |               |               |              |               |               |               |               |               |               |               |               |               |               |               |               |               |               |               |               |                                             |           |           |            |            |            |            |            |            |           |           |           |           |            |            |            |            |                          |               |               |               |               |               |               |               |               |               |               |               |               |               |               |               |               |                                                 |               |               |               |               |               |               |               |               |               |               |               |               |               |               |               |               |                                             |             |             |             |             |             |             |             |             |             |             |               |               |               |               |               |               |                      |            |            |            |            |            |            |            |            |            |            |            |            |            |              |              |              |                                                 |           |           |           |           |           |           |           |           |           |           |            |            |            |            |            |            |         |             |             |             |             |             |             |             |             |             |             |               |               |               |               |               |               |                      |           |           |           |           |           |           |           |           |           |           |           |           |            |            |            |  |
| Median                                          | 72                    | 72                    | 57                    | 57                    | 57                    | 57                    | 57                    | 57                    | 67                    | 67                    | 53                    | 53                    | 60                     | 60                     | 60                     | 60                     |                                            |               |               |               |               |               |               |               |               |               |               |               |               |               |               |               |               |                      |               |               |               |               |               |               |               |               |               |               |               |               |               |               |               |               |                                           |               |               |               |               |               |               |               |               |               |               |               |               |               |               |               |               |                             |               |               |               |               |               |               |               |               |               |               |               |               |               |               |               |               |                            |             |             |               |               |               |               |               |               |               |               |               |               |               |               |               |               |                                      |               |               |               |               |               |               |               |               |               |               |               |               |                |                |                |                |                                              |               |               |               |               |               |               |               |               |               |               |               |               |               |               |               |               |                                            |               |               |               |               |               |               |               |               |               |               |               |               |               |               |               |               |                                              |               |               |               |               |               |               |               |               |               |               |               |               |                |                |                |                |                                           |               |               |               |               |               |               |               |               |               |               |               |               |               |               |               |               |                          |               |               |               |               |               |               |               |               |               |               |               |               |               |               |               |               |                                            |             |             |               |               |               |               |               |               |               |               |               |               |               |               |               |               |                             |               |               |               |               |               |               |               |               |               |               |               |               |               |               |               |               |                                           |               |               |               |               |               |               |               |               |               |               |               |               |               |               |               |               |                                      |               |               |               |               |               |               |               |               |               |               |               |               |               |               |               |               |                                              |               |               |               |               |               |               |               |               |               |               |               |               |               |               |               |               |                                             |               |               |               |               |               |               |               |               |               |               |               |               |               |               |               |               |                                            |               |               |               |               |               |               |               |               |               |               |               |               |               |               |               |               |                                                 |             |             |             |             |             |             |             |             |            |            |            |            |              |              |              |              |                                              |               |               |               |               |               |               |               |               |               |               |               |               |               |               |               |               |                                                 |               |               |               |               |               |               |               |               |               |               |               |               |               |               |               |               |                          |               |               |               |               |               |               |               |               |               |               |               |               |               |               |               |               |                                           |               |               |               |               |               |               |               |               |               |               |               |               |               |               |               |               |                          |               |               |               |               |               |               |               |               |               |               |               |               |               |               |               |               |                                      |               |               |               |               |               |               |               |               |               |               |               |               |               |               |               |               |                                              |               |               |               |               |               |               |               |               |               |               |               |               |               |               |               |               |                                           |            |            |             |             |             |             |             |             |             |             |             |             |               |               |               |               |                                                 |               |               |               |               |               |               |               |               |               |               |               |               |               |               |               |               |                                              |               |               |               |               |               |               |               |               |               |               |               |               |               |               |               |               |                                             |               |               |             |             |             |             |             |             |               |               |               |               |               |               |               |               |                                            |               |               |               |               |               |               |               |               |             |             |               |               |               |               |               |               |                                                 |             |             |             |             |             |             |             |             |             |             |             |             |               |               |               |               |                                           |               |               |             |             |             |             |             |             |               |               |               |               |               |               |               |               |                          |               |               |               |               |               |               |               |               |               |               |               |               |               |               |               |               |                                      |               |               |               |               |               |               |               |               |               |               |               |               |               |               |               |               |                                              |             |             |             |             |             |             |             |             |             |             |            |            |               |               |               |               |                          |               |               |               |               |               |               |               |               |               |               |               |               |               |               |               |               |                                                 |               |               |               |               |               |               |               |               |               |               |               |               |               |               |               |               |                                              |             |             |             |             |             |             |             |             |             |             |               |               |               |               |               |               |                      |               |               |             |             |             |             |             |             |               |               |               |               |               |               |               |               |                                                 |               |               |               |               |               |               |               |               |             |             |               |               |               |               |               |               |                                        |             |             |             |             |             |             |             |             |             |             |               |               |               |               |               |               |                                           |               |               |             |             |             |             |             |             |               |               |               |               |               |               |               |               |                          |               |               |               |               |               |               |               |               |               |               |               |               |               |               |               |               |              |               |               |               |               |               |               |               |               |               |               |               |               |               |               |               |               |                                             |           |           |            |            |            |            |            |            |           |           |           |           |            |            |            |            |                          |               |               |               |               |               |               |               |               |               |               |               |               |               |               |               |               |                                                 |               |               |               |               |               |               |               |               |               |               |               |               |               |               |               |               |                                             |             |             |             |             |             |             |             |             |             |             |               |               |               |               |               |               |                      |            |            |            |            |            |            |            |            |            |            |            |            |            |              |              |              |                                                 |           |           |           |           |           |           |           |           |           |           |            |            |            |            |            |            |         |             |             |             |             |             |             |             |             |             |             |               |               |               |               |               |               |                      |           |           |           |           |           |           |           |           |           |           |           |           |            |            |            |  |
| Age (years), n (%)                              |                       |                       |                       |                       |                       |                       |                       |                       |                       |                       |                       |                       |                        |                        |                        |                        | 18-49 years                                | 186 (5.6%)    | 186 (5.6%)    | 1,221 (28.1%) | 1,221 (28.1%) | 1,221 (28.1%) | 1,221 (28.1%) | 1,221 (28.1%) | 1,221 (28.1%) | 732 (17.3%)   | 732 (17.3%)   | 2,389 (38.4%) | 2,389 (38.4%) | 4,428 (24.8%) | 4,428 (24.8%) | 4,428 (24.8%) | 4,428 (24.8%) | 50-64 years          | 663 (20.0%)   | 663 (20.0%)   | 1,902 (43.7%) | 1,902 (43.7%) | 1,902 (43.7%) | 1,902 (43.7%) | 1,902 (43.7%) | 1,902 (43.7%) | 1,169 (27.6%) | 1,169 (27.6%) | 3,140 (52.7%) | 3,140 (52.7%) | 6,874 (38.7%) | 6,874 (38.7%) | 6,874 (38.7%) | 6,874 (38.7%) | 65-74 years                               | 1,162 (35.0%) | 1,162 (35.0%) | 510 (11.7%)   | 510 (11.7%)   | 510 (11.7%)   | 510 (11.7%)   | 510 (11.7%)   | 510 (11.7%)   | 1,059 (25.0%) | 1,059 (25.0%) | 411 (6.9%)    | 411 (6.9%)    | 3,142 (17.6%) | 3,142 (17.6%) | 3,142 (17.6%) | 3,142 (17.6%) | ≥75 years                   | 1,307 (39.4%) | 1,307 (39.4%) | 719 (16.5%)   | 719 (16.5%)   | 719 (16.5%)   | 719 (16.5%)   | 719 (16.5%)   | 719 (16.5%)   | 1,283 (30.2%) | 1,283 (30.2%) | 121 (2.0%)    | 121 (2.0%)    | 3,430 (19.2%) | 3,430 (19.2%) | 3,430 (19.2%) | 3,430 (19.2%) | Missing                    | —           | —           | —             | —             | —             | —             | —             | —             | —             | —             | —             | —             | —             | —             | —             | —             | Sex, n (%)                           |               |               |               |               |               |               |               |               |               |               |               |               |                |                |                |                | Male                                         | 1,417 (42.7%) | 1,417 (42.7%) | 2,327 (53.4%) | 2,327 (53.4%) | 2,327 (53.4%) | 2,327 (53.4%) | 2,327 (53.4%) | 2,327 (53.4%) | 2,046 (48.7%) | 2,046 (48.7%) | 3,461 (58.1%) | 3,461 (58.1%) | 9,279 (51.9%) | 9,279 (51.9%) | 9,279 (51.9%) | 9,279 (51.9%) | Female                                     | 1,901 (57.3%) | 1,901 (57.3%) | 2,029 (46.6%) | 2,029 (46.6%) | 2,029 (46.6%) | 2,029 (46.6%) | 2,029 (46.6%) | 2,029 (46.6%) | 2,199 (51.3%) | 2,199 (51.3%) | 2,499 (41.9%) | 2,499 (41.9%) | 8,599 (48.1%) | 8,599 (48.1%) | 8,599 (48.1%) | 8,599 (48.1%) | Missing                                      | —             | —             | —             | —             | —             | —             | —             | —             | —             | —             | —             | —             | —              | —              | —              | —              | US Geographic Region, n (%)               |               |               |               |               |               |               |               |               |               |               |               |               |               |               |               |               | East                     | 72 (2.2%)     | 72 (2.2%)     | 724 (16.6%)   | 724 (16.6%)   | 724 (16.6%)   | 724 (16.6%)   | 724 (16.6%)   | 724 (16.6%)   | 402 (9.5%)    | 402 (9.5%)    | 1,080 (18.1%) | 1,080 (18.1%) | 2,278 (12.7%) | 2,278 (12.7%) | 2,278 (12.7%) | 2,278 (12.7%) | Midwest                                    | 693 (22.2%) | 693 (22.2%) | 2,097 (48.2%) | 2,097 (48.2%) | 2,097 (48.2%) | 2,097 (48.2%) | 2,097 (48.2%) | 2,097 (48.2%) | 1,175 (27.3%) | 1,175 (27.3%) | 1,491 (25.9%) | 1,491 (25.9%) | 5,347 (30.0%) | 5,347 (30.0%) | 5,347 (30.0%) | 5,347 (30.0%) | South                       | 2,065 (66.0%) | 2,065 (66.0%) | 2,065 (47.5%) | 2,065 (47.5%) | 2,065 (47.5%) | 2,065 (47.5%) | 2,065 (47.5%) | 2,065 (47.5%) | 1,856 (42.8%) | 1,856 (42.8%) | 2,126 (36.5%) | 2,126 (36.5%) | 7,372 (41.3%) | 7,372 (41.3%) | 7,372 (41.3%) | 7,372 (41.3%) | West                                      | 265 (8.0%)    | 265 (8.0%)    | 480 (11.0%)   | 480 (11.0%)   | 480 (11.0%)   | 480 (11.0%)   | 480 (11.0%)   | 480 (11.0%)   | 856 (20.2%)   | 856 (20.2%)   | 588 (10.3%)   | 588 (10.3%)   | 2,189 (12.2%) | 2,189 (12.2%) | 2,189 (12.2%) | 2,189 (12.2%) | Other                                | —             | —             | 15 (0.3%)     | 15 (0.3%)     | 15 (0.3%)     | 15 (0.3%)     | 15 (0.3%)     | 15 (0.3%)     | —             | —             | —             | —             | 15 (0.1%)     | 15 (0.1%)     | 15 (0.1%)     | 15 (0.1%)     | Missing                                      | —             | —             | —             | —             | —             | —             | —             | —             | —             | —             | —             | —             | —             | —             | —             | —             | Comorbidity Profile                         |               |               |               |               |               |               |               |               |               |               |               |               |               |               |               |               | Deyo-Charlson Comorbidity Index, mean (SD) | 2.0 (2.1)     | 2.1 (2.1)     | 0.7 (1.2)     | 0.6 (1.2)     | 0.6 (1.2)     | 0.6 (1.2)     | 0.6 (1.2)     | 0.6 (1.2)     | 1.3 (1.8)     | 1.3 (1.8)     | 0.6 (1.2)     | 0.6 (1.2)     | 1.0 (1.7)     | 1.0 (1.7)     | 1.0 (1.7)     | 1.0 (1.7)     | Comorbidities, n (%)                            |             |             |             |             |             |             |             |             |            |            |            |            |              |              |              |              | Acquired immunodeficiency syndrome (AIDS)    | 11 (0.4%)     | 11 (0.4%)     | 10 (0.2%)     | 11 (0.3%)     | 11 (0.3%)     | 11 (0.3%)     | 11 (0.3%)     | 11 (0.3%)     | 19 (0.4%)     | 19 (0.4%)     | 27 (0.5%)     | 26 (0.4%)     | 64 (0.4%)     | 64 (0.4%)     | 64 (0.4%)     | 64 (0.4%)     | Alcohol abuse                                   | 148 (4.5%)    | 148 (4.5%)    | 87 (2.0%)     | 86 (2.0%)     | 86 (2.0%)     | 86 (2.0%)     | 86 (2.0%)     | 86 (2.0%)     | 106 (2.4%)    | 106 (2.4%)    | 205 (3.4%)    | 205 (3.4%)    | 591 (3.3%)    | 591 (3.3%)    | 591 (3.3%)    | 591 (3.3%)    | Anemia                   | 811 (24.4%)   | 811 (24.4%)   | 795 (18.2%)   | 795 (18.2%)   | 795 (18.2%)   | 795 (18.2%)   | 795 (18.2%)   | 795 (18.2%)   | 701 (16.5%)   | 701 (16.5%)   | 686 (11.5%)   | 686 (11.5%)   | 2,562 (14.3%) | 2,562 (14.3%) | 2,562 (14.3%) | 2,562 (14.3%) | Bleeding                                  | 66 (2.0%)     | 67 (2.1%)     | 17 (0.4%)     | 16 (0.4%)     | 16 (0.4%)     | 16 (0.4%)     | 16 (0.4%)     | 16 (0.4%)     | 65 (1.5%)     | 65 (1.5%)     | 81 (1.4%)     | 77 (1.3%)     | 261 (1.5%)    | 261 (1.5%)    | 261 (1.5%)    | 261 (1.5%)    | Central venous catheter  | 152 (4.6%)    | 137 (4.1%)    | 99 (2.3%)     | 99 (2.3%)     | 99 (2.3%)     | 99 (2.3%)     | 99 (2.3%)     | 99 (2.3%)     | 181 (4.2%)    | 181 (4.2%)    | 255 (4.3%)    | 229 (3.9%)    | 689 (3.9%)    | 689 (3.9%)    | 689 (3.9%)    | 689 (3.9%)    | Cerebrovascular disease (stroke/TIA) | 406 (12.4%)   | 406 (12.4%)   | 276 (6.3%)    | 276 (6.3%)    | 276 (6.3%)    | 276 (6.3%)    | 276 (6.3%)    | 276 (6.3%)    | 317 (7.3%)    | 317 (7.3%)    | 323 (5.5%)    | 323 (5.5%)    | 1,242 (6.9%)  | 1,242 (6.9%)  | 1,242 (6.9%)  | 1,242 (6.9%)  | Chronic obstructive pulmonary disease (COPD) | 876 (26.4%)   | 876 (26.4%)   | 888 (20.0%)   | 888 (20.0%)   | 888 (20.0%)   | 888 (20.0%)   | 888 (20.0%)   | 888 (20.0%)   | 598 (13.8%)   | 598 (13.8%)   | 398 (6.7%)    | 398 (6.7%)    | 2,155 (12.1%) | 2,155 (12.1%) | 2,155 (12.1%) | 2,155 (12.1%) | Coagulopathy                              | 38 (1.1%)  | 49 (1.5%)  | 38 (0.9%)   | 30 (0.7%)   | 30 (0.7%)   | 30 (0.7%)   | 30 (0.7%)   | 30 (0.7%)   | 56 (1.3%)   | 56 (1.3%)   | 51 (0.9%)   | 51 (0.9%)   | 221 (1.2%)    | 221 (1.2%)    | 221 (1.2%)    | 221 (1.2%)    | Congestive heart failure                        | 1,127 (34.0%) | 1,127 (34.0%) | 1,114 (25.0%) | 1,114 (25.0%) | 1,114 (25.0%) | 1,114 (25.0%) | 1,114 (25.0%) | 1,114 (25.0%) | 924 (21.2%)   | 924 (21.2%)   | 874 (14.7%)   | 874 (14.7%)   | 3,466 (19.4%) | 3,466 (19.4%) | 3,466 (19.4%) | 3,466 (19.4%) | Ischemic heart/coronary artery disease       | 217 (7.1%)    | 184 (5.5%)    | 541 (12.2%)   | 441 (10.2%)   | 441 (10.2%)   | 441 (10.2%)   | 441 (10.2%)   | 441 (10.2%)   | 152 (3.5%)    | 152 (3.5%)    | 25 (0.4%)     | 21 (0.4%)     | 508 (2.8%)    | 425 (2.4%)    | 508 (2.8%)    | 425 (2.4%)    | Dementia                                    | 1,269 (39.4%) | 1,269 (39.4%) | 942 (21.6%) | 942 (21.6%) | 942 (21.6%) | 942 (21.6%) | 942 (21.6%) | 942 (21.6%) | 1,100 (25.0%) | 1,100 (25.0%) | 1,040 (17.6%) | 1,040 (17.6%) | 4,342 (24.3%) | 4,342 (24.3%) | 4,342 (24.3%) | 4,342 (24.3%) | Diabetes                                   | 708 (22.1%)   | 708 (22.1%)   | 1,113 (25.3%) | 1,113 (25.3%) | 1,113 (25.3%) | 1,113 (25.3%) | 1,113 (25.3%) | 1,113 (25.3%) | 978 (22.5%) | 978 (22.5%) | 1,031 (17.8%) | 1,031 (17.8%) | 3,271 (18.3%) | 3,271 (18.3%) | 3,271 (18.3%) | 3,271 (18.3%) | Disability                                      | 170 (5.1%)  | 170 (5.1%)  | 436 (10.0%) | 436 (10.0%) | 436 (10.0%) | 436 (10.0%) | 436 (10.0%) | 436 (10.0%) | 323 (7.4%)  | 323 (7.4%)  | 371 (6.4%)  | 371 (6.4%)  | 1,669 (9.3%)  | 1,669 (9.3%)  | 1,669 (9.3%)  | 1,669 (9.3%)  | Fractures involving the lower extremities | 76 (2.3%)     | 76 (2.3%)     | 217 (5.0%)  | 217 (5.0%)  | 217 (5.0%)  | 217 (5.0%)  | 217 (5.0%)  | 217 (5.0%)  | 44 (1.0%)     | 44 (1.0%)     | 43 (0.8%)     | 43 (0.8%)     | 191 (1.1%)    | 191 (1.1%)    | 191 (1.1%)    | 191 (1.1%)    | Hemiplegia or paraplegia | 2,150 (64.8%) | 2,150 (64.8%) | 1,747 (40.1%) | 1,668 (38.3%) | 1,668 (38.3%) | 1,668 (38.3%) | 1,668 (38.3%) | 1,668 (38.3%) | 2,120 (50.0%) | 2,120 (50.0%) | 1,907 (32.0%) | 1,907 (32.0%) | 7,875 (44.0%) | 7,875 (44.0%) | 7,875 (44.0%) | 7,875 (44.0%) | Hypertension                         | 2,680 (80.8%) | 2,680 (80.8%) | 2,648 (79.6%) | 2,648 (79.6%) | 2,648 (79.6%) | 2,648 (79.6%) | 2,648 (79.6%) | 2,648 (79.6%) | 2,499 (58.9%) | 2,499 (58.9%) | 2,054 (34.3%) | 2,054 (34.3%) | 9,799 (54.8%) | 9,799 (54.8%) | 9,799 (54.8%) | 9,799 (54.8%) | Hypertension<br>inflammatory bowel syndrome  | 38 (1.1%)   | 35 (1.1%)   | 32 (0.7%)   | 37 (0.8%)   | 37 (0.8%)   | 37 (0.8%)   | 37 (0.8%)   | 37 (0.8%)   | 29 (0.7%)   | 29 (0.7%)   | 80 (1.3%)  | 94 (1.6%)  | 179 (1.0%)    | 190 (1.1%)    | 190 (1.1%)    | 190 (1.1%)    | Liver disease            | 235 (7.1%)    | 246 (7.4%)    | 154 (3.5%)    | 154 (3.5%)    | 154 (3.5%)    | 154 (3.5%)    | 154 (3.5%)    | 154 (3.5%)    | 267 (6.3%)    | 267 (6.3%)    | 361 (6.1%)    | 361 (6.1%)    | 998 (5.6%)    | 1,031 (5.8%)  | 1,031 (5.8%)  | 1,031 (5.8%)  | Malignancy (excluding non-melanoma skin cancer) | 50 (1.5%)     | 46 (1.4%)     | 21 (0.5%)     | 21 (0.5%)     | 21 (0.5%)     | 21 (0.5%)     | 21 (0.5%)     | 21 (0.5%)     | 62 (1.4%)     | 62 (1.4%)     | 216 (3.7%)    | 216 (3.7%)    | 200 (1.1%)    | 200 (1.1%)    | 200 (1.1%)    | 200 (1.1%)    | Obesity                                      | 859 (25.9%) | 843 (25.4%) | 565 (13.0%) | 580 (13.3%) | 580 (13.3%) | 580 (13.3%) | 580 (13.3%) | 580 (13.3%) | 859 (20.2%) | 859 (20.2%) | 1,267 (21.3%) | 1,267 (21.3%) | 3,549 (19.9%) | 3,549 (19.9%) | 3,549 (19.9%) | 3,549 (19.9%) | Peptic ulcer disease | 52 (1.6%)     | 46 (1.4%)     | 39 (0.9%)   | 39 (0.9%)   | 39 (0.9%)   | 39 (0.9%)   | 39 (0.9%)   | 39 (0.9%)   | 39 (0.9%)     | 39 (0.9%)     | 41 (0.7%)     | 41 (0.7%)     | 160 (0.9%)    | 154 (0.9%)    | 154 (0.9%)    |               |                                                 |               |               |               |               |               |               |               |               |             |             |               |               |               |               |               |               |                                        |             |             |             |             |             |             |             |             |             |             |               |               |               |               |               |               |                                           |               |               |             |             |             |             |             |             |               |               |               |               |               |               |               |               |                          |               |               |               |               |               |               |               |               |               |               |               |               |               |               |               |               |              |               |               |               |               |               |               |               |               |               |               |               |               |               |               |               |               |                                             |           |           |            |            |            |            |            |            |           |           |           |           |            |            |            |            |                          |               |               |               |               |               |               |               |               |               |               |               |               |               |               |               |               |                                                 |               |               |               |               |               |               |               |               |               |               |               |               |               |               |               |               |                                             |             |             |             |             |             |             |             |             |             |             |               |               |               |               |               |               |                      |            |            |            |            |            |            |            |            |            |            |            |            |            |              |              |              |                                                 |           |           |           |           |           |           |           |           |           |           |            |            |            |            |            |            |         |             |             |             |             |             |             |             |             |             |             |               |               |               |               |               |               |                      |           |           |           |           |           |           |           |           |           |           |           |           |            |            |            |  |
| 18-49 years                                     | 186 (5.6%)            | 186 (5.6%)            | 1,221 (28.1%)         | 1,221 (28.1%)         | 1,221 (28.1%)         | 1,221 (28.1%)         | 1,221 (28.1%)         | 1,221 (28.1%)         | 732 (17.3%)           | 732 (17.3%)           | 2,389 (38.4%)         | 2,389 (38.4%)         | 4,428 (24.8%)          | 4,428 (24.8%)          | 4,428 (24.8%)          | 4,428 (24.8%)          |                                            |               |               |               |               |               |               |               |               |               |               |               |               |               |               |               |               |                      |               |               |               |               |               |               |               |               |               |               |               |               |               |               |               |               |                                           |               |               |               |               |               |               |               |               |               |               |               |               |               |               |               |               |                             |               |               |               |               |               |               |               |               |               |               |               |               |               |               |               |               |                            |             |             |               |               |               |               |               |               |               |               |               |               |               |               |               |               |                                      |               |               |               |               |               |               |               |               |               |               |               |               |                |                |                |                |                                              |               |               |               |               |               |               |               |               |               |               |               |               |               |               |               |               |                                            |               |               |               |               |               |               |               |               |               |               |               |               |               |               |               |               |                                              |               |               |               |               |               |               |               |               |               |               |               |               |                |                |                |                |                                           |               |               |               |               |               |               |               |               |               |               |               |               |               |               |               |               |                          |               |               |               |               |               |               |               |               |               |               |               |               |               |               |               |               |                                            |             |             |               |               |               |               |               |               |               |               |               |               |               |               |               |               |                             |               |               |               |               |               |               |               |               |               |               |               |               |               |               |               |               |                                           |               |               |               |               |               |               |               |               |               |               |               |               |               |               |               |               |                                      |               |               |               |               |               |               |               |               |               |               |               |               |               |               |               |               |                                              |               |               |               |               |               |               |               |               |               |               |               |               |               |               |               |               |                                             |               |               |               |               |               |               |               |               |               |               |               |               |               |               |               |               |                                            |               |               |               |               |               |               |               |               |               |               |               |               |               |               |               |               |                                                 |             |             |             |             |             |             |             |             |            |            |            |            |              |              |              |              |                                              |               |               |               |               |               |               |               |               |               |               |               |               |               |               |               |               |                                                 |               |               |               |               |               |               |               |               |               |               |               |               |               |               |               |               |                          |               |               |               |               |               |               |               |               |               |               |               |               |               |               |               |               |                                           |               |               |               |               |               |               |               |               |               |               |               |               |               |               |               |               |                          |               |               |               |               |               |               |               |               |               |               |               |               |               |               |               |               |                                      |               |               |               |               |               |               |               |               |               |               |               |               |               |               |               |               |                                              |               |               |               |               |               |               |               |               |               |               |               |               |               |               |               |               |                                           |            |            |             |             |             |             |             |             |             |             |             |             |               |               |               |               |                                                 |               |               |               |               |               |               |               |               |               |               |               |               |               |               |               |               |                                              |               |               |               |               |               |               |               |               |               |               |               |               |               |               |               |               |                                             |               |               |             |             |             |             |             |             |               |               |               |               |               |               |               |               |                                            |               |               |               |               |               |               |               |               |             |             |               |               |               |               |               |               |                                                 |             |             |             |             |             |             |             |             |             |             |             |             |               |               |               |               |                                           |               |               |             |             |             |             |             |             |               |               |               |               |               |               |               |               |                          |               |               |               |               |               |               |               |               |               |               |               |               |               |               |               |               |                                      |               |               |               |               |               |               |               |               |               |               |               |               |               |               |               |               |                                              |             |             |             |             |             |             |             |             |             |             |            |            |               |               |               |               |                          |               |               |               |               |               |               |               |               |               |               |               |               |               |               |               |               |                                                 |               |               |               |               |               |               |               |               |               |               |               |               |               |               |               |               |                                              |             |             |             |             |             |             |             |             |             |             |               |               |               |               |               |               |                      |               |               |             |             |             |             |             |             |               |               |               |               |               |               |               |               |                                                 |               |               |               |               |               |               |               |               |             |             |               |               |               |               |               |               |                                        |             |             |             |             |             |             |             |             |             |             |               |               |               |               |               |               |                                           |               |               |             |             |             |             |             |             |               |               |               |               |               |               |               |               |                          |               |               |               |               |               |               |               |               |               |               |               |               |               |               |               |               |              |               |               |               |               |               |               |               |               |               |               |               |               |               |               |               |               |                                             |           |           |            |            |            |            |            |            |           |           |           |           |            |            |            |            |                          |               |               |               |               |               |               |               |               |               |               |               |               |               |               |               |               |                                                 |               |               |               |               |               |               |               |               |               |               |               |               |               |               |               |               |                                             |             |             |             |             |             |             |             |             |             |             |               |               |               |               |               |               |                      |            |            |            |            |            |            |            |            |            |            |            |            |            |              |              |              |                                                 |           |           |           |           |           |           |           |           |           |           |            |            |            |            |            |            |         |             |             |             |             |             |             |             |             |             |             |               |               |               |               |               |               |                      |           |           |           |           |           |           |           |           |           |           |           |           |            |            |            |  |
| 50-64 years                                     | 663 (20.0%)           | 663 (20.0%)           | 1,902 (43.7%)         | 1,902 (43.7%)         | 1,902 (43.7%)         | 1,902 (43.7%)         | 1,902 (43.7%)         | 1,902 (43.7%)         | 1,169 (27.6%)         | 1,169 (27.6%)         | 3,140 (52.7%)         | 3,140 (52.7%)         | 6,874 (38.7%)          | 6,874 (38.7%)          | 6,874 (38.7%)          | 6,874 (38.7%)          |                                            |               |               |               |               |               |               |               |               |               |               |               |               |               |               |               |               |                      |               |               |               |               |               |               |               |               |               |               |               |               |               |               |               |               |                                           |               |               |               |               |               |               |               |               |               |               |               |               |               |               |               |               |                             |               |               |               |               |               |               |               |               |               |               |               |               |               |               |               |               |                            |             |             |               |               |               |               |               |               |               |               |               |               |               |               |               |               |                                      |               |               |               |               |               |               |               |               |               |               |               |               |                |                |                |                |                                              |               |               |               |               |               |               |               |               |               |               |               |               |               |               |               |               |                                            |               |               |               |               |               |               |               |               |               |               |               |               |               |               |               |               |                                              |               |               |               |               |               |               |               |               |               |               |               |               |                |                |                |                |                                           |               |               |               |               |               |               |               |               |               |               |               |               |               |               |               |               |                          |               |               |               |               |               |               |               |               |               |               |               |               |               |               |               |               |                                            |             |             |               |               |               |               |               |               |               |               |               |               |               |               |               |               |                             |               |               |               |               |               |               |               |               |               |               |               |               |               |               |               |               |                                           |               |               |               |               |               |               |               |               |               |               |               |               |               |               |               |               |                                      |               |               |               |               |               |               |               |               |               |               |               |               |               |               |               |               |                                              |               |               |               |               |               |               |               |               |               |               |               |               |               |               |               |               |                                             |               |               |               |               |               |               |               |               |               |               |               |               |               |               |               |               |                                            |               |               |               |               |               |               |               |               |               |               |               |               |               |               |               |               |                                                 |             |             |             |             |             |             |             |             |            |            |            |            |              |              |              |              |                                              |               |               |               |               |               |               |               |               |               |               |               |               |               |               |               |               |                                                 |               |               |               |               |               |               |               |               |               |               |               |               |               |               |               |               |                          |               |               |               |               |               |               |               |               |               |               |               |               |               |               |               |               |                                           |               |               |               |               |               |               |               |               |               |               |               |               |               |               |               |               |                          |               |               |               |               |               |               |               |               |               |               |               |               |               |               |               |               |                                      |               |               |               |               |               |               |               |               |               |               |               |               |               |               |               |               |                                              |               |               |               |               |               |               |               |               |               |               |               |               |               |               |               |               |                                           |            |            |             |             |             |             |             |             |             |             |             |             |               |               |               |               |                                                 |               |               |               |               |               |               |               |               |               |               |               |               |               |               |               |               |                                              |               |               |               |               |               |               |               |               |               |               |               |               |               |               |               |               |                                             |               |               |             |             |             |             |             |             |               |               |               |               |               |               |               |               |                                            |               |               |               |               |               |               |               |               |             |             |               |               |               |               |               |               |                                                 |             |             |             |             |             |             |             |             |             |             |             |             |               |               |               |               |                                           |               |               |             |             |             |             |             |             |               |               |               |               |               |               |               |               |                          |               |               |               |               |               |               |               |               |               |               |               |               |               |               |               |               |                                      |               |               |               |               |               |               |               |               |               |               |               |               |               |               |               |               |                                              |             |             |             |             |             |             |             |             |             |             |            |            |               |               |               |               |                          |               |               |               |               |               |               |               |               |               |               |               |               |               |               |               |               |                                                 |               |               |               |               |               |               |               |               |               |               |               |               |               |               |               |               |                                              |             |             |             |             |             |             |             |             |             |             |               |               |               |               |               |               |                      |               |               |             |             |             |             |             |             |               |               |               |               |               |               |               |               |                                                 |               |               |               |               |               |               |               |               |             |             |               |               |               |               |               |               |                                        |             |             |             |             |             |             |             |             |             |             |               |               |               |               |               |               |                                           |               |               |             |             |             |             |             |             |               |               |               |               |               |               |               |               |                          |               |               |               |               |               |               |               |               |               |               |               |               |               |               |               |               |              |               |               |               |               |               |               |               |               |               |               |               |               |               |               |               |               |                                             |           |           |            |            |            |            |            |            |           |           |           |           |            |            |            |            |                          |               |               |               |               |               |               |               |               |               |               |               |               |               |               |               |               |                                                 |               |               |               |               |               |               |               |               |               |               |               |               |               |               |               |               |                                             |             |             |             |             |             |             |             |             |             |             |               |               |               |               |               |               |                      |            |            |            |            |            |            |            |            |            |            |            |            |            |              |              |              |                                                 |           |           |           |           |           |           |           |           |           |           |            |            |            |            |            |            |         |             |             |             |             |             |             |             |             |             |             |               |               |               |               |               |               |                      |           |           |           |           |           |           |           |           |           |           |           |           |            |            |            |  |
| 65-74 years                                     | 1,162 (35.0%)         | 1,162 (35.0%)         | 510 (11.7%)           | 510 (11.7%)           | 510 (11.7%)           | 510 (11.7%)           | 510 (11.7%)           | 510 (11.7%)           | 1,059 (25.0%)         | 1,059 (25.0%)         | 411 (6.9%)            | 411 (6.9%)            | 3,142 (17.6%)          | 3,142 (17.6%)          | 3,142 (17.6%)          | 3,142 (17.6%)          |                                            |               |               |               |               |               |               |               |               |               |               |               |               |               |               |               |               |                      |               |               |               |               |               |               |               |               |               |               |               |               |               |               |               |               |                                           |               |               |               |               |               |               |               |               |               |               |               |               |               |               |               |               |                             |               |               |               |               |               |               |               |               |               |               |               |               |               |               |               |               |                            |             |             |               |               |               |               |               |               |               |               |               |               |               |               |               |               |                                      |               |               |               |               |               |               |               |               |               |               |               |               |                |                |                |                |                                              |               |               |               |               |               |               |               |               |               |               |               |               |               |               |               |               |                                            |               |               |               |               |               |               |               |               |               |               |               |               |               |               |               |               |                                              |               |               |               |               |               |               |               |               |               |               |               |               |                |                |                |                |                                           |               |               |               |               |               |               |               |               |               |               |               |               |               |               |               |               |                          |               |               |               |               |               |               |               |               |               |               |               |               |               |               |               |               |                                            |             |             |               |               |               |               |               |               |               |               |               |               |               |               |               |               |                             |               |               |               |               |               |               |               |               |               |               |               |               |               |               |               |               |                                           |               |               |               |               |               |               |               |               |               |               |               |               |               |               |               |               |                                      |               |               |               |               |               |               |               |               |               |               |               |               |               |               |               |               |                                              |               |               |               |               |               |               |               |               |               |               |               |               |               |               |               |               |                                             |               |               |               |               |               |               |               |               |               |               |               |               |               |               |               |               |                                            |               |               |               |               |               |               |               |               |               |               |               |               |               |               |               |               |                                                 |             |             |             |             |             |             |             |             |            |            |            |            |              |              |              |              |                                              |               |               |               |               |               |               |               |               |               |               |               |               |               |               |               |               |                                                 |               |               |               |               |               |               |               |               |               |               |               |               |               |               |               |               |                          |               |               |               |               |               |               |               |               |               |               |               |               |               |               |               |               |                                           |               |               |               |               |               |               |               |               |               |               |               |               |               |               |               |               |                          |               |               |               |               |               |               |               |               |               |               |               |               |               |               |               |               |                                      |               |               |               |               |               |               |               |               |               |               |               |               |               |               |               |               |                                              |               |               |               |               |               |               |               |               |               |               |               |               |               |               |               |               |                                           |            |            |             |             |             |             |             |             |             |             |             |             |               |               |               |               |                                                 |               |               |               |               |               |               |               |               |               |               |               |               |               |               |               |               |                                              |               |               |               |               |               |               |               |               |               |               |               |               |               |               |               |               |                                             |               |               |             |             |             |             |             |             |               |               |               |               |               |               |               |               |                                            |               |               |               |               |               |               |               |               |             |             |               |               |               |               |               |               |                                                 |             |             |             |             |             |             |             |             |             |             |             |             |               |               |               |               |                                           |               |               |             |             |             |             |             |             |               |               |               |               |               |               |               |               |                          |               |               |               |               |               |               |               |               |               |               |               |               |               |               |               |               |                                      |               |               |               |               |               |               |               |               |               |               |               |               |               |               |               |               |                                              |             |             |             |             |             |             |             |             |             |             |            |            |               |               |               |               |                          |               |               |               |               |               |               |               |               |               |               |               |               |               |               |               |               |                                                 |               |               |               |               |               |               |               |               |               |               |               |               |               |               |               |               |                                              |             |             |             |             |             |             |             |             |             |             |               |               |               |               |               |               |                      |               |               |             |             |             |             |             |             |               |               |               |               |               |               |               |               |                                                 |               |               |               |               |               |               |               |               |             |             |               |               |               |               |               |               |                                        |             |             |             |             |             |             |             |             |             |             |               |               |               |               |               |               |                                           |               |               |             |             |             |             |             |             |               |               |               |               |               |               |               |               |                          |               |               |               |               |               |               |               |               |               |               |               |               |               |               |               |               |              |               |               |               |               |               |               |               |               |               |               |               |               |               |               |               |               |                                             |           |           |            |            |            |            |            |            |           |           |           |           |            |            |            |            |                          |               |               |               |               |               |               |               |               |               |               |               |               |               |               |               |               |                                                 |               |               |               |               |               |               |               |               |               |               |               |               |               |               |               |               |                                             |             |             |             |             |             |             |             |             |             |             |               |               |               |               |               |               |                      |            |            |            |            |            |            |            |            |            |            |            |            |            |              |              |              |                                                 |           |           |           |           |           |           |           |           |           |           |            |            |            |            |            |            |         |             |             |             |             |             |             |             |             |             |             |               |               |               |               |               |               |                      |           |           |           |           |           |           |           |           |           |           |           |           |            |            |            |  |
| ≥75 years                                       | 1,307 (39.4%)         | 1,307 (39.4%)         | 719 (16.5%)           | 719 (16.5%)           | 719 (16.5%)           | 719 (16.5%)           | 719 (16.5%)           | 719 (16.5%)           | 1,283 (30.2%)         | 1,283 (30.2%)         | 121 (2.0%)            | 121 (2.0%)            | 3,430 (19.2%)          | 3,430 (19.2%)          | 3,430 (19.2%)          | 3,430 (19.2%)          |                                            |               |               |               |               |               |               |               |               |               |               |               |               |               |               |               |               |                      |               |               |               |               |               |               |               |               |               |               |               |               |               |               |               |               |                                           |               |               |               |               |               |               |               |               |               |               |               |               |               |               |               |               |                             |               |               |               |               |               |               |               |               |               |               |               |               |               |               |               |               |                            |             |             |               |               |               |               |               |               |               |               |               |               |               |               |               |               |                                      |               |               |               |               |               |               |               |               |               |               |               |               |                |                |                |                |                                              |               |               |               |               |               |               |               |               |               |               |               |               |               |               |               |               |                                            |               |               |               |               |               |               |               |               |               |               |               |               |               |               |               |               |                                              |               |               |               |               |               |               |               |               |               |               |               |               |                |                |                |                |                                           |               |               |               |               |               |               |               |               |               |               |               |               |               |               |               |               |                          |               |               |               |               |               |               |               |               |               |               |               |               |               |               |               |               |                                            |             |             |               |               |               |               |               |               |               |               |               |               |               |               |               |               |                             |               |               |               |               |               |               |               |               |               |               |               |               |               |               |               |               |                                           |               |               |               |               |               |               |               |               |               |               |               |               |               |               |               |               |                                      |               |               |               |               |               |               |               |               |               |               |               |               |               |               |               |               |                                              |               |               |               |               |               |               |               |               |               |               |               |               |               |               |               |               |                                             |               |               |               |               |               |               |               |               |               |               |               |               |               |               |               |               |                                            |               |               |               |               |               |               |               |               |               |               |               |               |               |               |               |               |                                                 |             |             |             |             |             |             |             |             |            |            |            |            |              |              |              |              |                                              |               |               |               |               |               |               |               |               |               |               |               |               |               |               |               |               |                                                 |               |               |               |               |               |               |               |               |               |               |               |               |               |               |               |               |                          |               |               |               |               |               |               |               |               |               |               |               |               |               |               |               |               |                                           |               |               |               |               |               |               |               |               |               |               |               |               |               |               |               |               |                          |               |               |               |               |               |               |               |               |               |               |               |               |               |               |               |               |                                      |               |               |               |               |               |               |               |               |               |               |               |               |               |               |               |               |                                              |               |               |               |               |               |               |               |               |               |               |               |               |               |               |               |               |                                           |            |            |             |             |             |             |             |             |             |             |             |             |               |               |               |               |                                                 |               |               |               |               |               |               |               |               |               |               |               |               |               |               |               |               |                                              |               |               |               |               |               |               |               |               |               |               |               |               |               |               |               |               |                                             |               |               |             |             |             |             |             |             |               |               |               |               |               |               |               |               |                                            |               |               |               |               |               |               |               |               |             |             |               |               |               |               |               |               |                                                 |             |             |             |             |             |             |             |             |             |             |             |             |               |               |               |               |                                           |               |               |             |             |             |             |             |             |               |               |               |               |               |               |               |               |                          |               |               |               |               |               |               |               |               |               |               |               |               |               |               |               |               |                                      |               |               |               |               |               |               |               |               |               |               |               |               |               |               |               |               |                                              |             |             |             |             |             |             |             |             |             |             |            |            |               |               |               |               |                          |               |               |               |               |               |               |               |               |               |               |               |               |               |               |               |               |                                                 |               |               |               |               |               |               |               |               |               |               |               |               |               |               |               |               |                                              |             |             |             |             |             |             |             |             |             |             |               |               |               |               |               |               |                      |               |               |             |             |             |             |             |             |               |               |               |               |               |               |               |               |                                                 |               |               |               |               |               |               |               |               |             |             |               |               |               |               |               |               |                                        |             |             |             |             |             |             |             |             |             |             |               |               |               |               |               |               |                                           |               |               |             |             |             |             |             |             |               |               |               |               |               |               |               |               |                          |               |               |               |               |               |               |               |               |               |               |               |               |               |               |               |               |              |               |               |               |               |               |               |               |               |               |               |               |               |               |               |               |               |                                             |           |           |            |            |            |            |            |            |           |           |           |           |            |            |            |            |                          |               |               |               |               |               |               |               |               |               |               |               |               |               |               |               |               |                                                 |               |               |               |               |               |               |               |               |               |               |               |               |               |               |               |               |                                             |             |             |             |             |             |             |             |             |             |             |               |               |               |               |               |               |                      |            |            |            |            |            |            |            |            |            |            |            |            |            |              |              |              |                                                 |           |           |           |           |           |           |           |           |           |           |            |            |            |            |            |            |         |             |             |             |             |             |             |             |             |             |             |               |               |               |               |               |               |                      |           |           |           |           |           |           |           |           |           |           |           |           |            |            |            |  |
| Missing                                         | —                     | —                     | —                     | —                     | —                     | —                     | —                     | —                     | —                     | —                     | —                     | —                     | —                      | —                      | —                      | —                      |                                            |               |               |               |               |               |               |               |               |               |               |               |               |               |               |               |               |                      |               |               |               |               |               |               |               |               |               |               |               |               |               |               |               |               |                                           |               |               |               |               |               |               |               |               |               |               |               |               |               |               |               |               |                             |               |               |               |               |               |               |               |               |               |               |               |               |               |               |               |               |                            |             |             |               |               |               |               |               |               |               |               |               |               |               |               |               |               |                                      |               |               |               |               |               |               |               |               |               |               |               |               |                |                |                |                |                                              |               |               |               |               |               |               |               |               |               |               |               |               |               |               |               |               |                                            |               |               |               |               |               |               |               |               |               |               |               |               |               |               |               |               |                                              |               |               |               |               |               |               |               |               |               |               |               |               |                |                |                |                |                                           |               |               |               |               |               |               |               |               |               |               |               |               |               |               |               |               |                          |               |               |               |               |               |               |               |               |               |               |               |               |               |               |               |               |                                            |             |             |               |               |               |               |               |               |               |               |               |               |               |               |               |               |                             |               |               |               |               |               |               |               |               |               |               |               |               |               |               |               |               |                                           |               |               |               |               |               |               |               |               |               |               |               |               |               |               |               |               |                                      |               |               |               |               |               |               |               |               |               |               |               |               |               |               |               |               |                                              |               |               |               |               |               |               |               |               |               |               |               |               |               |               |               |               |                                             |               |               |               |               |               |               |               |               |               |               |               |               |               |               |               |               |                                            |               |               |               |               |               |               |               |               |               |               |               |               |               |               |               |               |                                                 |             |             |             |             |             |             |             |             |            |            |            |            |              |              |              |              |                                              |               |               |               |               |               |               |               |               |               |               |               |               |               |               |               |               |                                                 |               |               |               |               |               |               |               |               |               |               |               |               |               |               |               |               |                          |               |               |               |               |               |               |               |               |               |               |               |               |               |               |               |               |                                           |               |               |               |               |               |               |               |               |               |               |               |               |               |               |               |               |                          |               |               |               |               |               |               |               |               |               |               |               |               |               |               |               |               |                                      |               |               |               |               |               |               |               |               |               |               |               |               |               |               |               |               |                                              |               |               |               |               |               |               |               |               |               |               |               |               |               |               |               |               |                                           |            |            |             |             |             |             |             |             |             |             |             |             |               |               |               |               |                                                 |               |               |               |               |               |               |               |               |               |               |               |               |               |               |               |               |                                              |               |               |               |               |               |               |               |               |               |               |               |               |               |               |               |               |                                             |               |               |             |             |             |             |             |             |               |               |               |               |               |               |               |               |                                            |               |               |               |               |               |               |               |               |             |             |               |               |               |               |               |               |                                                 |             |             |             |             |             |             |             |             |             |             |             |             |               |               |               |               |                                           |               |               |             |             |             |             |             |             |               |               |               |               |               |               |               |               |                          |               |               |               |               |               |               |               |               |               |               |               |               |               |               |               |               |                                      |               |               |               |               |               |               |               |               |               |               |               |               |               |               |               |               |                                              |             |             |             |             |             |             |             |             |             |             |            |            |               |               |               |               |                          |               |               |               |               |               |               |               |               |               |               |               |               |               |               |               |               |                                                 |               |               |               |               |               |               |               |               |               |               |               |               |               |               |               |               |                                              |             |             |             |             |             |             |             |             |             |             |               |               |               |               |               |               |                      |               |               |             |             |             |             |             |             |               |               |               |               |               |               |               |               |                                                 |               |               |               |               |               |               |               |               |             |             |               |               |               |               |               |               |                                        |             |             |             |             |             |             |             |             |             |             |               |               |               |               |               |               |                                           |               |               |             |             |             |             |             |             |               |               |               |               |               |               |               |               |                          |               |               |               |               |               |               |               |               |               |               |               |               |               |               |               |               |              |               |               |               |               |               |               |               |               |               |               |               |               |               |               |               |               |                                             |           |           |            |            |            |            |            |            |           |           |           |           |            |            |            |            |                          |               |               |               |               |               |               |               |               |               |               |               |               |               |               |               |               |                                                 |               |               |               |               |               |               |               |               |               |               |               |               |               |               |               |               |                                             |             |             |             |             |             |             |             |             |             |             |               |               |               |               |               |               |                      |            |            |            |            |            |            |            |            |            |            |            |            |            |              |              |              |                                                 |           |           |           |           |           |           |           |           |           |           |            |            |            |            |            |            |         |             |             |             |             |             |             |             |             |             |             |               |               |               |               |               |               |                      |           |           |           |           |           |           |           |           |           |           |           |           |            |            |            |  |
| Sex, n (%)                                      |                       |                       |                       |                       |                       |                       |                       |                       |                       |                       |                       |                       |                        |                        |                        |                        | Male                                       | 1,417 (42.7%) | 1,417 (42.7%) | 2,327 (53.4%) | 2,327 (53.4%) | 2,327 (53.4%) | 2,327 (53.4%) | 2,327 (53.4%) | 2,327 (53.4%) | 2,046 (48.7%) | 2,046 (48.7%) | 3,461 (58.1%) | 3,461 (58.1%) | 9,279 (51.9%) | 9,279 (51.9%) | 9,279 (51.9%) | 9,279 (51.9%) | Female               | 1,901 (57.3%) | 1,901 (57.3%) | 2,029 (46.6%) | 2,029 (46.6%) | 2,029 (46.6%) | 2,029 (46.6%) | 2,029 (46.6%) | 2,029 (46.6%) | 2,199 (51.3%) | 2,199 (51.3%) | 2,499 (41.9%) | 2,499 (41.9%) | 8,599 (48.1%) | 8,599 (48.1%) | 8,599 (48.1%) | 8,599 (48.1%) | Missing                                   | —             | —             | —             | —             | —             | —             | —             | —             | —             | —             | —             | —             | —             | —             | —             | —             | US Geographic Region, n (%) |               |               |               |               |               |               |               |               |               |               |               |               |               |               |               |               | East                       | 72 (2.2%)   | 72 (2.2%)   | 724 (16.6%)   | 724 (16.6%)   | 724 (16.6%)   | 724 (16.6%)   | 724 (16.6%)   | 724 (16.6%)   | 402 (9.5%)    | 402 (9.5%)    | 1,080 (18.1%) | 1,080 (18.1%) | 2,278 (12.7%) | 2,278 (12.7%) | 2,278 (12.7%) | 2,278 (12.7%) | Midwest                              | 693 (22.2%)   | 693 (22.2%)   | 2,097 (48.2%) | 2,097 (48.2%) | 2,097 (48.2%) | 2,097 (48.2%) | 2,097 (48.2%) | 2,097 (48.2%) | 1,175 (27.3%) | 1,175 (27.3%) | 1,491 (25.9%) | 1,491 (25.9%) | 5,347 (30.0%)  | 5,347 (30.0%)  | 5,347 (30.0%)  | 5,347 (30.0%)  | South                                        | 2,065 (66.0%) | 2,065 (66.0%) | 2,065 (47.5%) | 2,065 (47.5%) | 2,065 (47.5%) | 2,065 (47.5%) | 2,065 (47.5%) | 2,065 (47.5%) | 1,856 (42.8%) | 1,856 (42.8%) | 2,126 (36.5%) | 2,126 (36.5%) | 7,372 (41.3%) | 7,372 (41.3%) | 7,372 (41.3%) | 7,372 (41.3%) | West                                       | 265 (8.0%)    | 265 (8.0%)    | 480 (11.0%)   | 480 (11.0%)   | 480 (11.0%)   | 480 (11.0%)   | 480 (11.0%)   | 480 (11.0%)   | 856 (20.2%)   | 856 (20.2%)   | 588 (10.3%)   | 588 (10.3%)   | 2,189 (12.2%) | 2,189 (12.2%) | 2,189 (12.2%) | 2,189 (12.2%) | Other                                        | —             | —             | 15 (0.3%)     | 15 (0.3%)     | 15 (0.3%)     | 15 (0.3%)     | 15 (0.3%)     | 15 (0.3%)     | —             | —             | —             | —             | 15 (0.1%)      | 15 (0.1%)      | 15 (0.1%)      | 15 (0.1%)      | Missing                                   | —             | —             | —             | —             | —             | —             | —             | —             | —             | —             | —             | —             | —             | —             | —             | —             | Comorbidity Profile      |               |               |               |               |               |               |               |               |               |               |               |               |               |               |               |               | Deyo-Charlson Comorbidity Index, mean (SD) | 2.0 (2.1)   | 2.1 (2.1)   | 0.7 (1.2)     | 0.6 (1.2)     | 0.6 (1.2)     | 0.6 (1.2)     | 0.6 (1.2)     | 0.6 (1.2)     | 1.3 (1.8)     | 1.3 (1.8)     | 0.6 (1.2)     | 0.6 (1.2)     | 1.0 (1.7)     | 1.0 (1.7)     | 1.0 (1.7)     | 1.0 (1.7)     | Comorbidities, n (%)        |               |               |               |               |               |               |               |               |               |               |               |               |               |               |               |               | Acquired immunodeficiency syndrome (AIDS) | 11 (0.4%)     | 11 (0.4%)     | 10 (0.2%)     | 11 (0.3%)     | 11 (0.3%)     | 11 (0.3%)     | 11 (0.3%)     | 11 (0.3%)     | 19 (0.4%)     | 19 (0.4%)     | 27 (0.5%)     | 26 (0.4%)     | 64 (0.4%)     | 64 (0.4%)     | 64 (0.4%)     | 64 (0.4%)     | Alcohol abuse                        | 148 (4.5%)    | 148 (4.5%)    | 87 (2.0%)     | 86 (2.0%)     | 86 (2.0%)     | 86 (2.0%)     | 86 (2.0%)     | 86 (2.0%)     | 106 (2.4%)    | 106 (2.4%)    | 205 (3.4%)    | 205 (3.4%)    | 591 (3.3%)    | 591 (3.3%)    | 591 (3.3%)    | 591 (3.3%)    | Anemia                                       | 811 (24.4%)   | 811 (24.4%)   | 795 (18.2%)   | 795 (18.2%)   | 795 (18.2%)   | 795 (18.2%)   | 795 (18.2%)   | 795 (18.2%)   | 701 (16.5%)   | 701 (16.5%)   | 686 (11.5%)   | 686 (11.5%)   | 2,562 (14.3%) | 2,562 (14.3%) | 2,562 (14.3%) | 2,562 (14.3%) | Bleeding                                    | 66 (2.0%)     | 67 (2.1%)     | 17 (0.4%)     | 16 (0.4%)     | 16 (0.4%)     | 16 (0.4%)     | 16 (0.4%)     | 16 (0.4%)     | 65 (1.5%)     | 65 (1.5%)     | 81 (1.4%)     | 77 (1.3%)     | 261 (1.5%)    | 261 (1.5%)    | 261 (1.5%)    | 261 (1.5%)    | Central venous catheter                    | 152 (4.6%)    | 137 (4.1%)    | 99 (2.3%)     | 99 (2.3%)     | 99 (2.3%)     | 99 (2.3%)     | 99 (2.3%)     | 99 (2.3%)     | 181 (4.2%)    | 181 (4.2%)    | 255 (4.3%)    | 229 (3.9%)    | 689 (3.9%)    | 689 (3.9%)    | 689 (3.9%)    | 689 (3.9%)    | Cerebrovascular disease (stroke/TIA)            | 406 (12.4%) | 406 (12.4%) | 276 (6.3%)  | 276 (6.3%)  | 276 (6.3%)  | 276 (6.3%)  | 276 (6.3%)  | 276 (6.3%)  | 317 (7.3%) | 317 (7.3%) | 323 (5.5%) | 323 (5.5%) | 1,242 (6.9%) | 1,242 (6.9%) | 1,242 (6.9%) | 1,242 (6.9%) | Chronic obstructive pulmonary disease (COPD) | 876 (26.4%)   | 876 (26.4%)   | 888 (20.0%)   | 888 (20.0%)   | 888 (20.0%)   | 888 (20.0%)   | 888 (20.0%)   | 888 (20.0%)   | 598 (13.8%)   | 598 (13.8%)   | 398 (6.7%)    | 398 (6.7%)    | 2,155 (12.1%) | 2,155 (12.1%) | 2,155 (12.1%) | 2,155 (12.1%) | Coagulopathy                                    | 38 (1.1%)     | 49 (1.5%)     | 38 (0.9%)     | 30 (0.7%)     | 30 (0.7%)     | 30 (0.7%)     | 30 (0.7%)     | 30 (0.7%)     | 56 (1.3%)     | 56 (1.3%)     | 51 (0.9%)     | 51 (0.9%)     | 221 (1.2%)    | 221 (1.2%)    | 221 (1.2%)    | 221 (1.2%)    | Congestive heart failure | 1,127 (34.0%) | 1,127 (34.0%) | 1,114 (25.0%) | 1,114 (25.0%) | 1,114 (25.0%) | 1,114 (25.0%) | 1,114 (25.0%) | 1,114 (25.0%) | 924 (21.2%)   | 924 (21.2%)   | 874 (14.7%)   | 874 (14.7%)   | 3,466 (19.4%) | 3,466 (19.4%) | 3,466 (19.4%) | 3,466 (19.4%) | Ischemic heart/coronary artery disease    | 217 (7.1%)    | 184 (5.5%)    | 541 (12.2%)   | 441 (10.2%)   | 441 (10.2%)   | 441 (10.2%)   | 441 (10.2%)   | 441 (10.2%)   | 152 (3.5%)    | 152 (3.5%)    | 25 (0.4%)     | 21 (0.4%)     | 508 (2.8%)    | 425 (2.4%)    | 508 (2.8%)    | 425 (2.4%)    | Dementia                 | 1,269 (39.4%) | 1,269 (39.4%) | 942 (21.6%)   | 942 (21.6%)   | 942 (21.6%)   | 942 (21.6%)   | 942 (21.6%)   | 942 (21.6%)   | 1,100 (25.0%) | 1,100 (25.0%) | 1,040 (17.6%) | 1,040 (17.6%) | 4,342 (24.3%) | 4,342 (24.3%) | 4,342 (24.3%) | 4,342 (24.3%) | Diabetes                             | 708 (22.1%)   | 708 (22.1%)   | 1,113 (25.3%) | 1,113 (25.3%) | 1,113 (25.3%) | 1,113 (25.3%) | 1,113 (25.3%) | 1,113 (25.3%) | 978 (22.5%)   | 978 (22.5%)   | 1,031 (17.8%) | 1,031 (17.8%) | 3,271 (18.3%) | 3,271 (18.3%) | 3,271 (18.3%) | 3,271 (18.3%) | Disability                                   | 170 (5.1%)    | 170 (5.1%)    | 436 (10.0%)   | 436 (10.0%)   | 436 (10.0%)   | 436 (10.0%)   | 436 (10.0%)   | 436 (10.0%)   | 323 (7.4%)    | 323 (7.4%)    | 371 (6.4%)    | 371 (6.4%)    | 1,669 (9.3%)  | 1,669 (9.3%)  | 1,669 (9.3%)  | 1,669 (9.3%)  | Fractures involving the lower extremities | 76 (2.3%)  | 76 (2.3%)  | 217 (5.0%)  | 217 (5.0%)  | 217 (5.0%)  | 217 (5.0%)  | 217 (5.0%)  | 217 (5.0%)  | 44 (1.0%)   | 44 (1.0%)   | 43 (0.8%)   | 43 (0.8%)   | 191 (1.1%)    | 191 (1.1%)    | 191 (1.1%)    | 191 (1.1%)    | Hemiplegia or paraplegia                        | 2,150 (64.8%) | 2,150 (64.8%) | 1,747 (40.1%) | 1,668 (38.3%) | 1,668 (38.3%) | 1,668 (38.3%) | 1,668 (38.3%) | 1,668 (38.3%) | 2,120 (50.0%) | 2,120 (50.0%) | 1,907 (32.0%) | 1,907 (32.0%) | 7,875 (44.0%) | 7,875 (44.0%) | 7,875 (44.0%) | 7,875 (44.0%) | Hypertension                                 | 2,680 (80.8%) | 2,680 (80.8%) | 2,648 (79.6%) | 2,648 (79.6%) | 2,648 (79.6%) | 2,648 (79.6%) | 2,648 (79.6%) | 2,648 (79.6%) | 2,499 (58.9%) | 2,499 (58.9%) | 2,054 (34.3%) | 2,054 (34.3%) | 9,799 (54.8%) | 9,799 (54.8%) | 9,799 (54.8%) | 9,799 (54.8%) | Hypertension<br>inflammatory bowel syndrome | 38 (1.1%)     | 35 (1.1%)     | 32 (0.7%)   | 37 (0.8%)   | 37 (0.8%)   | 37 (0.8%)   | 37 (0.8%)   | 37 (0.8%)   | 29 (0.7%)     | 29 (0.7%)     | 80 (1.3%)     | 94 (1.6%)     | 179 (1.0%)    | 190 (1.1%)    | 190 (1.1%)    | 190 (1.1%)    | Liver disease                              | 235 (7.1%)    | 246 (7.4%)    | 154 (3.5%)    | 154 (3.5%)    | 154 (3.5%)    | 154 (3.5%)    | 154 (3.5%)    | 154 (3.5%)    | 267 (6.3%)  | 267 (6.3%)  | 361 (6.1%)    | 361 (6.1%)    | 998 (5.6%)    | 1,031 (5.8%)  | 1,031 (5.8%)  | 1,031 (5.8%)  | Malignancy (excluding non-melanoma skin cancer) | 50 (1.5%)   | 46 (1.4%)   | 21 (0.5%)   | 21 (0.5%)   | 21 (0.5%)   | 21 (0.5%)   | 21 (0.5%)   | 21 (0.5%)   | 62 (1.4%)   | 62 (1.4%)   | 216 (3.7%)  | 216 (3.7%)  | 200 (1.1%)    | 200 (1.1%)    | 200 (1.1%)    | 200 (1.1%)    | Obesity                                   | 859 (25.9%)   | 843 (25.4%)   | 565 (13.0%) | 580 (13.3%) | 580 (13.3%) | 580 (13.3%) | 580 (13.3%) | 580 (13.3%) | 859 (20.2%)   | 859 (20.2%)   | 1,267 (21.3%) | 1,267 (21.3%) | 3,549 (19.9%) | 3,549 (19.9%) | 3,549 (19.9%) | 3,549 (19.9%) | Peptic ulcer disease     | 52 (1.6%)     | 46 (1.4%)     | 39 (0.9%)     | 39 (0.9%)     | 39 (0.9%)     | 39 (0.9%)     | 39 (0.9%)     | 39 (0.9%)     | 39 (0.9%)     | 39 (0.9%)     | 41 (0.7%)     | 41 (0.7%)     | 160 (0.9%)    | 154 (0.9%)    | 154 (0.9%)    |               |                                      |               |               |               |               |               |               |               |               |               |               |               |               |               |               |               |               |                                              |             |             |             |             |             |             |             |             |             |             |            |            |               |               |               |               |                          |               |               |               |               |               |               |               |               |               |               |               |               |               |               |               |               |                                                 |               |               |               |               |               |               |               |               |               |               |               |               |               |               |               |               |                                              |             |             |             |             |             |             |             |             |             |             |               |               |               |               |               |               |                      |               |               |             |             |             |             |             |             |               |               |               |               |               |               |               |               |                                                 |               |               |               |               |               |               |               |               |             |             |               |               |               |               |               |               |                                        |             |             |             |             |             |             |             |             |             |             |               |               |               |               |               |               |                                           |               |               |             |             |             |             |             |             |               |               |               |               |               |               |               |               |                          |               |               |               |               |               |               |               |               |               |               |               |               |               |               |               |               |              |               |               |               |               |               |               |               |               |               |               |               |               |               |               |               |               |                                             |           |           |            |            |            |            |            |            |           |           |           |           |            |            |            |            |                          |               |               |               |               |               |               |               |               |               |               |               |               |               |               |               |               |                                                 |               |               |               |               |               |               |               |               |               |               |               |               |               |               |               |               |                                             |             |             |             |             |             |             |             |             |             |             |               |               |               |               |               |               |                      |            |            |            |            |            |            |            |            |            |            |            |            |            |              |              |              |                                                 |           |           |           |           |           |           |           |           |           |           |            |            |            |            |            |            |         |             |             |             |             |             |             |             |             |             |             |               |               |               |               |               |               |                      |           |           |           |           |           |           |           |           |           |           |           |           |            |            |            |  |
| Male                                            | 1,417 (42.7%)         | 1,417 (42.7%)         | 2,327 (53.4%)         | 2,327 (53.4%)         | 2,327 (53.4%)         | 2,327 (53.4%)         | 2,327 (53.4%)         | 2,327 (53.4%)         | 2,046 (48.7%)         | 2,046 (48.7%)         | 3,461 (58.1%)         | 3,461 (58.1%)         | 9,279 (51.9%)          | 9,279 (51.9%)          | 9,279 (51.9%)          | 9,279 (51.9%)          |                                            |               |               |               |               |               |               |               |               |               |               |               |               |               |               |               |               |                      |               |               |               |               |               |               |               |               |               |               |               |               |               |               |               |               |                                           |               |               |               |               |               |               |               |               |               |               |               |               |               |               |               |               |                             |               |               |               |               |               |               |               |               |               |               |               |               |               |               |               |               |                            |             |             |               |               |               |               |               |               |               |               |               |               |               |               |               |               |                                      |               |               |               |               |               |               |               |               |               |               |               |               |                |                |                |                |                                              |               |               |               |               |               |               |               |               |               |               |               |               |               |               |               |               |                                            |               |               |               |               |               |               |               |               |               |               |               |               |               |               |               |               |                                              |               |               |               |               |               |               |               |               |               |               |               |               |                |                |                |                |                                           |               |               |               |               |               |               |               |               |               |               |               |               |               |               |               |               |                          |               |               |               |               |               |               |               |               |               |               |               |               |               |               |               |               |                                            |             |             |               |               |               |               |               |               |               |               |               |               |               |               |               |               |                             |               |               |               |               |               |               |               |               |               |               |               |               |               |               |               |               |                                           |               |               |               |               |               |               |               |               |               |               |               |               |               |               |               |               |                                      |               |               |               |               |               |               |               |               |               |               |               |               |               |               |               |               |                                              |               |               |               |               |               |               |               |               |               |               |               |               |               |               |               |               |                                             |               |               |               |               |               |               |               |               |               |               |               |               |               |               |               |               |                                            |               |               |               |               |               |               |               |               |               |               |               |               |               |               |               |               |                                                 |             |             |             |             |             |             |             |             |            |            |            |            |              |              |              |              |                                              |               |               |               |               |               |               |               |               |               |               |               |               |               |               |               |               |                                                 |               |               |               |               |               |               |               |               |               |               |               |               |               |               |               |               |                          |               |               |               |               |               |               |               |               |               |               |               |               |               |               |               |               |                                           |               |               |               |               |               |               |               |               |               |               |               |               |               |               |               |               |                          |               |               |               |               |               |               |               |               |               |               |               |               |               |               |               |               |                                      |               |               |               |               |               |               |               |               |               |               |               |               |               |               |               |               |                                              |               |               |               |               |               |               |               |               |               |               |               |               |               |               |               |               |                                           |            |            |             |             |             |             |             |             |             |             |             |             |               |               |               |               |                                                 |               |               |               |               |               |               |               |               |               |               |               |               |               |               |               |               |                                              |               |               |               |               |               |               |               |               |               |               |               |               |               |               |               |               |                                             |               |               |             |             |             |             |             |             |               |               |               |               |               |               |               |               |                                            |               |               |               |               |               |               |               |               |             |             |               |               |               |               |               |               |                                                 |             |             |             |             |             |             |             |             |             |             |             |             |               |               |               |               |                                           |               |               |             |             |             |             |             |             |               |               |               |               |               |               |               |               |                          |               |               |               |               |               |               |               |               |               |               |               |               |               |               |               |               |                                      |               |               |               |               |               |               |               |               |               |               |               |               |               |               |               |               |                                              |             |             |             |             |             |             |             |             |             |             |            |            |               |               |               |               |                          |               |               |               |               |               |               |               |               |               |               |               |               |               |               |               |               |                                                 |               |               |               |               |               |               |               |               |               |               |               |               |               |               |               |               |                                              |             |             |             |             |             |             |             |             |             |             |               |               |               |               |               |               |                      |               |               |             |             |             |             |             |             |               |               |               |               |               |               |               |               |                                                 |               |               |               |               |               |               |               |               |             |             |               |               |               |               |               |               |                                        |             |             |             |             |             |             |             |             |             |             |               |               |               |               |               |               |                                           |               |               |             |             |             |             |             |             |               |               |               |               |               |               |               |               |                          |               |               |               |               |               |               |               |               |               |               |               |               |               |               |               |               |              |               |               |               |               |               |               |               |               |               |               |               |               |               |               |               |               |                                             |           |           |            |            |            |            |            |            |           |           |           |           |            |            |            |            |                          |               |               |               |               |               |               |               |               |               |               |               |               |               |               |               |               |                                                 |               |               |               |               |               |               |               |               |               |               |               |               |               |               |               |               |                                             |             |             |             |             |             |             |             |             |             |             |               |               |               |               |               |               |                      |            |            |            |            |            |            |            |            |            |            |            |            |            |              |              |              |                                                 |           |           |           |           |           |           |           |           |           |           |            |            |            |            |            |            |         |             |             |             |             |             |             |             |             |             |             |               |               |               |               |               |               |                      |           |           |           |           |           |           |           |           |           |           |           |           |            |            |            |  |
| Female                                          | 1,901 (57.3%)         | 1,901 (57.3%)         | 2,029 (46.6%)         | 2,029 (46.6%)         | 2,029 (46.6%)         | 2,029 (46.6%)         | 2,029 (46.6%)         | 2,029 (46.6%)         | 2,199 (51.3%)         | 2,199 (51.3%)         | 2,499 (41.9%)         | 2,499 (41.9%)         | 8,599 (48.1%)          | 8,599 (48.1%)          | 8,599 (48.1%)          | 8,599 (48.1%)          |                                            |               |               |               |               |               |               |               |               |               |               |               |               |               |               |               |               |                      |               |               |               |               |               |               |               |               |               |               |               |               |               |               |               |               |                                           |               |               |               |               |               |               |               |               |               |               |               |               |               |               |               |               |                             |               |               |               |               |               |               |               |               |               |               |               |               |               |               |               |               |                            |             |             |               |               |               |               |               |               |               |               |               |               |               |               |               |               |                                      |               |               |               |               |               |               |               |               |               |               |               |               |                |                |                |                |                                              |               |               |               |               |               |               |               |               |               |               |               |               |               |               |               |               |                                            |               |               |               |               |               |               |               |               |               |               |               |               |               |               |               |               |                                              |               |               |               |               |               |               |               |               |               |               |               |               |                |                |                |                |                                           |               |               |               |               |               |               |               |               |               |               |               |               |               |               |               |               |                          |               |               |               |               |               |               |               |               |               |               |               |               |               |               |               |               |                                            |             |             |               |               |               |               |               |               |               |               |               |               |               |               |               |               |                             |               |               |               |               |               |               |               |               |               |               |               |               |               |               |               |               |                                           |               |               |               |               |               |               |               |               |               |               |               |               |               |               |               |               |                                      |               |               |               |               |               |               |               |               |               |               |               |               |               |               |               |               |                                              |               |               |               |               |               |               |               |               |               |               |               |               |               |               |               |               |                                             |               |               |               |               |               |               |               |               |               |               |               |               |               |               |               |               |                                            |               |               |               |               |               |               |               |               |               |               |               |               |               |               |               |               |                                                 |             |             |             |             |             |             |             |             |            |            |            |            |              |              |              |              |                                              |               |               |               |               |               |               |               |               |               |               |               |               |               |               |               |               |                                                 |               |               |               |               |               |               |               |               |               |               |               |               |               |               |               |               |                          |               |               |               |               |               |               |               |               |               |               |               |               |               |               |               |               |                                           |               |               |               |               |               |               |               |               |               |               |               |               |               |               |               |               |                          |               |               |               |               |               |               |               |               |               |               |               |               |               |               |               |               |                                      |               |               |               |               |               |               |               |               |               |               |               |               |               |               |               |               |                                              |               |               |               |               |               |               |               |               |               |               |               |               |               |               |               |               |                                           |            |            |             |             |             |             |             |             |             |             |             |             |               |               |               |               |                                                 |               |               |               |               |               |               |               |               |               |               |               |               |               |               |               |               |                                              |               |               |               |               |               |               |               |               |               |               |               |               |               |               |               |               |                                             |               |               |             |             |             |             |             |             |               |               |               |               |               |               |               |               |                                            |               |               |               |               |               |               |               |               |             |             |               |               |               |               |               |               |                                                 |             |             |             |             |             |             |             |             |             |             |             |             |               |               |               |               |                                           |               |               |             |             |             |             |             |             |               |               |               |               |               |               |               |               |                          |               |               |               |               |               |               |               |               |               |               |               |               |               |               |               |               |                                      |               |               |               |               |               |               |               |               |               |               |               |               |               |               |               |               |                                              |             |             |             |             |             |             |             |             |             |             |            |            |               |               |               |               |                          |               |               |               |               |               |               |               |               |               |               |               |               |               |               |               |               |                                                 |               |               |               |               |               |               |               |               |               |               |               |               |               |               |               |               |                                              |             |             |             |             |             |             |             |             |             |             |               |               |               |               |               |               |                      |               |               |             |             |             |             |             |             |               |               |               |               |               |               |               |               |                                                 |               |               |               |               |               |               |               |               |             |             |               |               |               |               |               |               |                                        |             |             |             |             |             |             |             |             |             |             |               |               |               |               |               |               |                                           |               |               |             |             |             |             |             |             |               |               |               |               |               |               |               |               |                          |               |               |               |               |               |               |               |               |               |               |               |               |               |               |               |               |              |               |               |               |               |               |               |               |               |               |               |               |               |               |               |               |               |                                             |           |           |            |            |            |            |            |            |           |           |           |           |            |            |            |            |                          |               |               |               |               |               |               |               |               |               |               |               |               |               |               |               |               |                                                 |               |               |               |               |               |               |               |               |               |               |               |               |               |               |               |               |                                             |             |             |             |             |             |             |             |             |             |             |               |               |               |               |               |               |                      |            |            |            |            |            |            |            |            |            |            |            |            |            |              |              |              |                                                 |           |           |           |           |           |           |           |           |           |           |            |            |            |            |            |            |         |             |             |             |             |             |             |             |             |             |             |               |               |               |               |               |               |                      |           |           |           |           |           |           |           |           |           |           |           |           |            |            |            |  |
| Missing                                         | —                     | —                     | —                     | —                     | —                     | —                     | —                     | —                     | —                     | —                     | —                     | —                     | —                      | —                      | —                      | —                      |                                            |               |               |               |               |               |               |               |               |               |               |               |               |               |               |               |               |                      |               |               |               |               |               |               |               |               |               |               |               |               |               |               |               |               |                                           |               |               |               |               |               |               |               |               |               |               |               |               |               |               |               |               |                             |               |               |               |               |               |               |               |               |               |               |               |               |               |               |               |               |                            |             |             |               |               |               |               |               |               |               |               |               |               |               |               |               |               |                                      |               |               |               |               |               |               |               |               |               |               |               |               |                |                |                |                |                                              |               |               |               |               |               |               |               |               |               |               |               |               |               |               |               |               |                                            |               |               |               |               |               |               |               |               |               |               |               |               |               |               |               |               |                                              |               |               |               |               |               |               |               |               |               |               |               |               |                |                |                |                |                                           |               |               |               |               |               |               |               |               |               |               |               |               |               |               |               |               |                          |               |               |               |               |               |               |               |               |               |               |               |               |               |               |               |               |                                            |             |             |               |               |               |               |               |               |               |               |               |               |               |               |               |               |                             |               |               |               |               |               |               |               |               |               |               |               |               |               |               |               |               |                                           |               |               |               |               |               |               |               |               |               |               |               |               |               |               |               |               |                                      |               |               |               |               |               |               |               |               |               |               |               |               |               |               |               |               |                                              |               |               |               |               |               |               |               |               |               |               |               |               |               |               |               |               |                                             |               |               |               |               |               |               |               |               |               |               |               |               |               |               |               |               |                                            |               |               |               |               |               |               |               |               |               |               |               |               |               |               |               |               |                                                 |             |             |             |             |             |             |             |             |            |            |            |            |              |              |              |              |                                              |               |               |               |               |               |               |               |               |               |               |               |               |               |               |               |               |                                                 |               |               |               |               |               |               |               |               |               |               |               |               |               |               |               |               |                          |               |               |               |               |               |               |               |               |               |               |               |               |               |               |               |               |                                           |               |               |               |               |               |               |               |               |               |               |               |               |               |               |               |               |                          |               |               |               |               |               |               |               |               |               |               |               |               |               |               |               |               |                                      |               |               |               |               |               |               |               |               |               |               |               |               |               |               |               |               |                                              |               |               |               |               |               |               |               |               |               |               |               |               |               |               |               |               |                                           |            |            |             |             |             |             |             |             |             |             |             |             |               |               |               |               |                                                 |               |               |               |               |               |               |               |               |               |               |               |               |               |               |               |               |                                              |               |               |               |               |               |               |               |               |               |               |               |               |               |               |               |               |                                             |               |               |             |             |             |             |             |             |               |               |               |               |               |               |               |               |                                            |               |               |               |               |               |               |               |               |             |             |               |               |               |               |               |               |                                                 |             |             |             |             |             |             |             |             |             |             |             |             |               |               |               |               |                                           |               |               |             |             |             |             |             |             |               |               |               |               |               |               |               |               |                          |               |               |               |               |               |               |               |               |               |               |               |               |               |               |               |               |                                      |               |               |               |               |               |               |               |               |               |               |               |               |               |               |               |               |                                              |             |             |             |             |             |             |             |             |             |             |            |            |               |               |               |               |                          |               |               |               |               |               |               |               |               |               |               |               |               |               |               |               |               |                                                 |               |               |               |               |               |               |               |               |               |               |               |               |               |               |               |               |                                              |             |             |             |             |             |             |             |             |             |             |               |               |               |               |               |               |                      |               |               |             |             |             |             |             |             |               |               |               |               |               |               |               |               |                                                 |               |               |               |               |               |               |               |               |             |             |               |               |               |               |               |               |                                        |             |             |             |             |             |             |             |             |             |             |               |               |               |               |               |               |                                           |               |               |             |             |             |             |             |             |               |               |               |               |               |               |               |               |                          |               |               |               |               |               |               |               |               |               |               |               |               |               |               |               |               |              |               |               |               |               |               |               |               |               |               |               |               |               |               |               |               |               |                                             |           |           |            |            |            |            |            |            |           |           |           |           |            |            |            |            |                          |               |               |               |               |               |               |               |               |               |               |               |               |               |               |               |               |                                                 |               |               |               |               |               |               |               |               |               |               |               |               |               |               |               |               |                                             |             |             |             |             |             |             |             |             |             |             |               |               |               |               |               |               |                      |            |            |            |            |            |            |            |            |            |            |            |            |            |              |              |              |                                                 |           |           |           |           |           |           |           |           |           |           |            |            |            |            |            |            |         |             |             |             |             |             |             |             |             |             |             |               |               |               |               |               |               |                      |           |           |           |           |           |           |           |           |           |           |           |           |            |            |            |  |
| US Geographic Region, n (%)                     |                       |                       |                       |                       |                       |                       |                       |                       |                       |                       |                       |                       |                        |                        |                        |                        | East                                       | 72 (2.2%)     | 72 (2.2%)     | 724 (16.6%)   | 724 (16.6%)   | 724 (16.6%)   | 724 (16.6%)   | 724 (16.6%)   | 724 (16.6%)   | 402 (9.5%)    | 402 (9.5%)    | 1,080 (18.1%) | 1,080 (18.1%) | 2,278 (12.7%) | 2,278 (12.7%) | 2,278 (12.7%) | 2,278 (12.7%) | Midwest              | 693 (22.2%)   | 693 (22.2%)   | 2,097 (48.2%) | 2,097 (48.2%) | 2,097 (48.2%) | 2,097 (48.2%) | 2,097 (48.2%) | 2,097 (48.2%) | 1,175 (27.3%) | 1,175 (27.3%) | 1,491 (25.9%) | 1,491 (25.9%) | 5,347 (30.0%) | 5,347 (30.0%) | 5,347 (30.0%) | 5,347 (30.0%) | South                                     | 2,065 (66.0%) | 2,065 (66.0%) | 2,065 (47.5%) | 2,065 (47.5%) | 2,065 (47.5%) | 2,065 (47.5%) | 2,065 (47.5%) | 2,065 (47.5%) | 1,856 (42.8%) | 1,856 (42.8%) | 2,126 (36.5%) | 2,126 (36.5%) | 7,372 (41.3%) | 7,372 (41.3%) | 7,372 (41.3%) | 7,372 (41.3%) | West                        | 265 (8.0%)    | 265 (8.0%)    | 480 (11.0%)   | 480 (11.0%)   | 480 (11.0%)   | 480 (11.0%)   | 480 (11.0%)   | 480 (11.0%)   | 856 (20.2%)   | 856 (20.2%)   | 588 (10.3%)   | 588 (10.3%)   | 2,189 (12.2%) | 2,189 (12.2%) | 2,189 (12.2%) | 2,189 (12.2%) | Other                      | —           | —           | 15 (0.3%)     | 15 (0.3%)     | 15 (0.3%)     | 15 (0.3%)     | 15 (0.3%)     | 15 (0.3%)     | —             | —             | —             | —             | 15 (0.1%)     | 15 (0.1%)     | 15 (0.1%)     | 15 (0.1%)     | Missing                              | —             | —             | —             | —             | —             | —             | —             | —             | —             | —             | —             | —             | —              | —              | —              | —              | Comorbidity Profile                          |               |               |               |               |               |               |               |               |               |               |               |               |               |               |               |               | Deyo-Charlson Comorbidity Index, mean (SD) | 2.0 (2.1)     | 2.1 (2.1)     | 0.7 (1.2)     | 0.6 (1.2)     | 0.6 (1.2)     | 0.6 (1.2)     | 0.6 (1.2)     | 0.6 (1.2)     | 1.3 (1.8)     | 1.3 (1.8)     | 0.6 (1.2)     | 0.6 (1.2)     | 1.0 (1.7)     | 1.0 (1.7)     | 1.0 (1.7)     | 1.0 (1.7)     | Comorbidities, n (%)                         |               |               |               |               |               |               |               |               |               |               |               |               |                |                |                |                | Acquired immunodeficiency syndrome (AIDS) | 11 (0.4%)     | 11 (0.4%)     | 10 (0.2%)     | 11 (0.3%)     | 11 (0.3%)     | 11 (0.3%)     | 11 (0.3%)     | 11 (0.3%)     | 19 (0.4%)     | 19 (0.4%)     | 27 (0.5%)     | 26 (0.4%)     | 64 (0.4%)     | 64 (0.4%)     | 64 (0.4%)     | 64 (0.4%)     | Alcohol abuse            | 148 (4.5%)    | 148 (4.5%)    | 87 (2.0%)     | 86 (2.0%)     | 86 (2.0%)     | 86 (2.0%)     | 86 (2.0%)     | 86 (2.0%)     | 106 (2.4%)    | 106 (2.4%)    | 205 (3.4%)    | 205 (3.4%)    | 591 (3.3%)    | 591 (3.3%)    | 591 (3.3%)    | 591 (3.3%)    | Anemia                                     | 811 (24.4%) | 811 (24.4%) | 795 (18.2%)   | 795 (18.2%)   | 795 (18.2%)   | 795 (18.2%)   | 795 (18.2%)   | 795 (18.2%)   | 701 (16.5%)   | 701 (16.5%)   | 686 (11.5%)   | 686 (11.5%)   | 2,562 (14.3%) | 2,562 (14.3%) | 2,562 (14.3%) | 2,562 (14.3%) | Bleeding                    | 66 (2.0%)     | 67 (2.1%)     | 17 (0.4%)     | 16 (0.4%)     | 16 (0.4%)     | 16 (0.4%)     | 16 (0.4%)     | 16 (0.4%)     | 65 (1.5%)     | 65 (1.5%)     | 81 (1.4%)     | 77 (1.3%)     | 261 (1.5%)    | 261 (1.5%)    | 261 (1.5%)    | 261 (1.5%)    | Central venous catheter                   | 152 (4.6%)    | 137 (4.1%)    | 99 (2.3%)     | 99 (2.3%)     | 99 (2.3%)     | 99 (2.3%)     | 99 (2.3%)     | 99 (2.3%)     | 181 (4.2%)    | 181 (4.2%)    | 255 (4.3%)    | 229 (3.9%)    | 689 (3.9%)    | 689 (3.9%)    | 689 (3.9%)    | 689 (3.9%)    | Cerebrovascular disease (stroke/TIA) | 406 (12.4%)   | 406 (12.4%)   | 276 (6.3%)    | 276 (6.3%)    | 276 (6.3%)    | 276 (6.3%)    | 276 (6.3%)    | 276 (6.3%)    | 317 (7.3%)    | 317 (7.3%)    | 323 (5.5%)    | 323 (5.5%)    | 1,242 (6.9%)  | 1,242 (6.9%)  | 1,242 (6.9%)  | 1,242 (6.9%)  | Chronic obstructive pulmonary disease (COPD) | 876 (26.4%)   | 876 (26.4%)   | 888 (20.0%)   | 888 (20.0%)   | 888 (20.0%)   | 888 (20.0%)   | 888 (20.0%)   | 888 (20.0%)   | 598 (13.8%)   | 598 (13.8%)   | 398 (6.7%)    | 398 (6.7%)    | 2,155 (12.1%) | 2,155 (12.1%) | 2,155 (12.1%) | 2,155 (12.1%) | Coagulopathy                                | 38 (1.1%)     | 49 (1.5%)     | 38 (0.9%)     | 30 (0.7%)     | 30 (0.7%)     | 30 (0.7%)     | 30 (0.7%)     | 30 (0.7%)     | 56 (1.3%)     | 56 (1.3%)     | 51 (0.9%)     | 51 (0.9%)     | 221 (1.2%)    | 221 (1.2%)    | 221 (1.2%)    | 221 (1.2%)    | Congestive heart failure                   | 1,127 (34.0%) | 1,127 (34.0%) | 1,114 (25.0%) | 1,114 (25.0%) | 1,114 (25.0%) | 1,114 (25.0%) | 1,114 (25.0%) | 1,114 (25.0%) | 924 (21.2%)   | 924 (21.2%)   | 874 (14.7%)   | 874 (14.7%)   | 3,466 (19.4%) | 3,466 (19.4%) | 3,466 (19.4%) | 3,466 (19.4%) | Ischemic heart/coronary artery disease          | 217 (7.1%)  | 184 (5.5%)  | 541 (12.2%) | 441 (10.2%) | 441 (10.2%) | 441 (10.2%) | 441 (10.2%) | 441 (10.2%) | 152 (3.5%) | 152 (3.5%) | 25 (0.4%)  | 21 (0.4%)  | 508 (2.8%)   | 425 (2.4%)   | 508 (2.8%)   | 425 (2.4%)   | Dementia                                     | 1,269 (39.4%) | 1,269 (39.4%) | 942 (21.6%)   | 942 (21.6%)   | 942 (21.6%)   | 942 (21.6%)   | 942 (21.6%)   | 942 (21.6%)   | 1,100 (25.0%) | 1,100 (25.0%) | 1,040 (17.6%) | 1,040 (17.6%) | 4,342 (24.3%) | 4,342 (24.3%) | 4,342 (24.3%) | 4,342 (24.3%) | Diabetes                                        | 708 (22.1%)   | 708 (22.1%)   | 1,113 (25.3%) | 1,113 (25.3%) | 1,113 (25.3%) | 1,113 (25.3%) | 1,113 (25.3%) | 1,113 (25.3%) | 978 (22.5%)   | 978 (22.5%)   | 1,031 (17.8%) | 1,031 (17.8%) | 3,271 (18.3%) | 3,271 (18.3%) | 3,271 (18.3%) | 3,271 (18.3%) | Disability               | 170 (5.1%)    | 170 (5.1%)    | 436 (10.0%)   | 436 (10.0%)   | 436 (10.0%)   | 436 (10.0%)   | 436 (10.0%)   | 436 (10.0%)   | 323 (7.4%)    | 323 (7.4%)    | 371 (6.4%)    | 371 (6.4%)    | 1,669 (9.3%)  | 1,669 (9.3%)  | 1,669 (9.3%)  | 1,669 (9.3%)  | Fractures involving the lower extremities | 76 (2.3%)     | 76 (2.3%)     | 217 (5.0%)    | 217 (5.0%)    | 217 (5.0%)    | 217 (5.0%)    | 217 (5.0%)    | 217 (5.0%)    | 44 (1.0%)     | 44 (1.0%)     | 43 (0.8%)     | 43 (0.8%)     | 191 (1.1%)    | 191 (1.1%)    | 191 (1.1%)    | 191 (1.1%)    | Hemiplegia or paraplegia | 2,150 (64.8%) | 2,150 (64.8%) | 1,747 (40.1%) | 1,668 (38.3%) | 1,668 (38.3%) | 1,668 (38.3%) | 1,668 (38.3%) | 1,668 (38.3%) | 2,120 (50.0%) | 2,120 (50.0%) | 1,907 (32.0%) | 1,907 (32.0%) | 7,875 (44.0%) | 7,875 (44.0%) | 7,875 (44.0%) | 7,875 (44.0%) | Hypertension                         | 2,680 (80.8%) | 2,680 (80.8%) | 2,648 (79.6%) | 2,648 (79.6%) | 2,648 (79.6%) | 2,648 (79.6%) | 2,648 (79.6%) | 2,648 (79.6%) | 2,499 (58.9%) | 2,499 (58.9%) | 2,054 (34.3%) | 2,054 (34.3%) | 9,799 (54.8%) | 9,799 (54.8%) | 9,799 (54.8%) | 9,799 (54.8%) | Hypertension<br>inflammatory bowel syndrome  | 38 (1.1%)     | 35 (1.1%)     | 32 (0.7%)     | 37 (0.8%)     | 37 (0.8%)     | 37 (0.8%)     | 37 (0.8%)     | 37 (0.8%)     | 29 (0.7%)     | 29 (0.7%)     | 80 (1.3%)     | 94 (1.6%)     | 179 (1.0%)    | 190 (1.1%)    | 190 (1.1%)    | 190 (1.1%)    | Liver disease                             | 235 (7.1%) | 246 (7.4%) | 154 (3.5%)  | 154 (3.5%)  | 154 (3.5%)  | 154 (3.5%)  | 154 (3.5%)  | 154 (3.5%)  | 267 (6.3%)  | 267 (6.3%)  | 361 (6.1%)  | 361 (6.1%)  | 998 (5.6%)    | 1,031 (5.8%)  | 1,031 (5.8%)  | 1,031 (5.8%)  | Malignancy (excluding non-melanoma skin cancer) | 50 (1.5%)     | 46 (1.4%)     | 21 (0.5%)     | 21 (0.5%)     | 21 (0.5%)     | 21 (0.5%)     | 21 (0.5%)     | 21 (0.5%)     | 62 (1.4%)     | 62 (1.4%)     | 216 (3.7%)    | 216 (3.7%)    | 200 (1.1%)    | 200 (1.1%)    | 200 (1.1%)    | 200 (1.1%)    | Obesity                                      | 859 (25.9%)   | 843 (25.4%)   | 565 (13.0%)   | 580 (13.3%)   | 580 (13.3%)   | 580 (13.3%)   | 580 (13.3%)   | 580 (13.3%)   | 859 (20.2%)   | 859 (20.2%)   | 1,267 (21.3%) | 1,267 (21.3%) | 3,549 (19.9%) | 3,549 (19.9%) | 3,549 (19.9%) | 3,549 (19.9%) | Peptic ulcer disease                        | 52 (1.6%)     | 46 (1.4%)     | 39 (0.9%)   | 39 (0.9%)   | 39 (0.9%)   | 39 (0.9%)   | 39 (0.9%)   | 39 (0.9%)   | 39 (0.9%)     | 39 (0.9%)     | 41 (0.7%)     | 41 (0.7%)     | 160 (0.9%)    | 154 (0.9%)    | 154 (0.9%)    |               |                                            |               |               |               |               |               |               |               |               |             |             |               |               |               |               |               |               |                                                 |             |             |             |             |             |             |             |             |             |             |             |             |               |               |               |               |                                           |               |               |             |             |             |             |             |             |               |               |               |               |               |               |               |               |                          |               |               |               |               |               |               |               |               |               |               |               |               |               |               |               |               |                                      |               |               |               |               |               |               |               |               |               |               |               |               |               |               |               |               |                                              |             |             |             |             |             |             |             |             |             |             |            |            |               |               |               |               |                          |               |               |               |               |               |               |               |               |               |               |               |               |               |               |               |               |                                                 |               |               |               |               |               |               |               |               |               |               |               |               |               |               |               |               |                                              |             |             |             |             |             |             |             |             |             |             |               |               |               |               |               |               |                      |               |               |             |             |             |             |             |             |               |               |               |               |               |               |               |               |                                                 |               |               |               |               |               |               |               |               |             |             |               |               |               |               |               |               |                                        |             |             |             |             |             |             |             |             |             |             |               |               |               |               |               |               |                                           |               |               |             |             |             |             |             |             |               |               |               |               |               |               |               |               |                          |               |               |               |               |               |               |               |               |               |               |               |               |               |               |               |               |              |               |               |               |               |               |               |               |               |               |               |               |               |               |               |               |               |                                             |           |           |            |            |            |            |            |            |           |           |           |           |            |            |            |            |                          |               |               |               |               |               |               |               |               |               |               |               |               |               |               |               |               |                                                 |               |               |               |               |               |               |               |               |               |               |               |               |               |               |               |               |                                             |             |             |             |             |             |             |             |             |             |             |               |               |               |               |               |               |                      |            |            |            |            |            |            |            |            |            |            |            |            |            |              |              |              |                                                 |           |           |           |           |           |           |           |           |           |           |            |            |            |            |            |            |         |             |             |             |             |             |             |             |             |             |             |               |               |               |               |               |               |                      |           |           |           |           |           |           |           |           |           |           |           |           |            |            |            |  |
| East                                            | 72 (2.2%)             | 72 (2.2%)             | 724 (16.6%)           | 724 (16.6%)           | 724 (16.6%)           | 724 (16.6%)           | 724 (16.6%)           | 724 (16.6%)           | 402 (9.5%)            | 402 (9.5%)            | 1,080 (18.1%)         | 1,080 (18.1%)         | 2,278 (12.7%)          | 2,278 (12.7%)          | 2,278 (12.7%)          | 2,278 (12.7%)          |                                            |               |               |               |               |               |               |               |               |               |               |               |               |               |               |               |               |                      |               |               |               |               |               |               |               |               |               |               |               |               |               |               |               |               |                                           |               |               |               |               |               |               |               |               |               |               |               |               |               |               |               |               |                             |               |               |               |               |               |               |               |               |               |               |               |               |               |               |               |               |                            |             |             |               |               |               |               |               |               |               |               |               |               |               |               |               |               |                                      |               |               |               |               |               |               |               |               |               |               |               |               |                |                |                |                |                                              |               |               |               |               |               |               |               |               |               |               |               |               |               |               |               |               |                                            |               |               |               |               |               |               |               |               |               |               |               |               |               |               |               |               |                                              |               |               |               |               |               |               |               |               |               |               |               |               |                |                |                |                |                                           |               |               |               |               |               |               |               |               |               |               |               |               |               |               |               |               |                          |               |               |               |               |               |               |               |               |               |               |               |               |               |               |               |               |                                            |             |             |               |               |               |               |               |               |               |               |               |               |               |               |               |               |                             |               |               |               |               |               |               |               |               |               |               |               |               |               |               |               |               |                                           |               |               |               |               |               |               |               |               |               |               |               |               |               |               |               |               |                                      |               |               |               |               |               |               |               |               |               |               |               |               |               |               |               |               |                                              |               |               |               |               |               |               |               |               |               |               |               |               |               |               |               |               |                                             |               |               |               |               |               |               |               |               |               |               |               |               |               |               |               |               |                                            |               |               |               |               |               |               |               |               |               |               |               |               |               |               |               |               |                                                 |             |             |             |             |             |             |             |             |            |            |            |            |              |              |              |              |                                              |               |               |               |               |               |               |               |               |               |               |               |               |               |               |               |               |                                                 |               |               |               |               |               |               |               |               |               |               |               |               |               |               |               |               |                          |               |               |               |               |               |               |               |               |               |               |               |               |               |               |               |               |                                           |               |               |               |               |               |               |               |               |               |               |               |               |               |               |               |               |                          |               |               |               |               |               |               |               |               |               |               |               |               |               |               |               |               |                                      |               |               |               |               |               |               |               |               |               |               |               |               |               |               |               |               |                                              |               |               |               |               |               |               |               |               |               |               |               |               |               |               |               |               |                                           |            |            |             |             |             |             |             |             |             |             |             |             |               |               |               |               |                                                 |               |               |               |               |               |               |               |               |               |               |               |               |               |               |               |               |                                              |               |               |               |               |               |               |               |               |               |               |               |               |               |               |               |               |                                             |               |               |             |             |             |             |             |             |               |               |               |               |               |               |               |               |                                            |               |               |               |               |               |               |               |               |             |             |               |               |               |               |               |               |                                                 |             |             |             |             |             |             |             |             |             |             |             |             |               |               |               |               |                                           |               |               |             |             |             |             |             |             |               |               |               |               |               |               |               |               |                          |               |               |               |               |               |               |               |               |               |               |               |               |               |               |               |               |                                      |               |               |               |               |               |               |               |               |               |               |               |               |               |               |               |               |                                              |             |             |             |             |             |             |             |             |             |             |            |            |               |               |               |               |                          |               |               |               |               |               |               |               |               |               |               |               |               |               |               |               |               |                                                 |               |               |               |               |               |               |               |               |               |               |               |               |               |               |               |               |                                              |             |             |             |             |             |             |             |             |             |             |               |               |               |               |               |               |                      |               |               |             |             |             |             |             |             |               |               |               |               |               |               |               |               |                                                 |               |               |               |               |               |               |               |               |             |             |               |               |               |               |               |               |                                        |             |             |             |             |             |             |             |             |             |             |               |               |               |               |               |               |                                           |               |               |             |             |             |             |             |             |               |               |               |               |               |               |               |               |                          |               |               |               |               |               |               |               |               |               |               |               |               |               |               |               |               |              |               |               |               |               |               |               |               |               |               |               |               |               |               |               |               |               |                                             |           |           |            |            |            |            |            |            |           |           |           |           |            |            |            |            |                          |               |               |               |               |               |               |               |               |               |               |               |               |               |               |               |               |                                                 |               |               |               |               |               |               |               |               |               |               |               |               |               |               |               |               |                                             |             |             |             |             |             |             |             |             |             |             |               |               |               |               |               |               |                      |            |            |            |            |            |            |            |            |            |            |            |            |            |              |              |              |                                                 |           |           |           |           |           |           |           |           |           |           |            |            |            |            |            |            |         |             |             |             |             |             |             |             |             |             |             |               |               |               |               |               |               |                      |           |           |           |           |           |           |           |           |           |           |           |           |            |            |            |  |
| Midwest                                         | 693 (22.2%)           | 693 (22.2%)           | 2,097 (48.2%)         | 2,097 (48.2%)         | 2,097 (48.2%)         | 2,097 (48.2%)         | 2,097 (48.2%)         | 2,097 (48.2%)         | 1,175 (27.3%)         | 1,175 (27.3%)         | 1,491 (25.9%)         | 1,491 (25.9%)         | 5,347 (30.0%)          | 5,347 (30.0%)          | 5,347 (30.0%)          | 5,347 (30.0%)          |                                            |               |               |               |               |               |               |               |               |               |               |               |               |               |               |               |               |                      |               |               |               |               |               |               |               |               |               |               |               |               |               |               |               |               |                                           |               |               |               |               |               |               |               |               |               |               |               |               |               |               |               |               |                             |               |               |               |               |               |               |               |               |               |               |               |               |               |               |               |               |                            |             |             |               |               |               |               |               |               |               |               |               |               |               |               |               |               |                                      |               |               |               |               |               |               |               |               |               |               |               |               |                |                |                |                |                                              |               |               |               |               |               |               |               |               |               |               |               |               |               |               |               |               |                                            |               |               |               |               |               |               |               |               |               |               |               |               |               |               |               |               |                                              |               |               |               |               |               |               |               |               |               |               |               |               |                |                |                |                |                                           |               |               |               |               |               |               |               |               |               |               |               |               |               |               |               |               |                          |               |               |               |               |               |               |               |               |               |               |               |               |               |               |               |               |                                            |             |             |               |               |               |               |               |               |               |               |               |               |               |               |               |               |                             |               |               |               |               |               |               |               |               |               |               |               |               |               |               |               |               |                                           |               |               |               |               |               |               |               |               |               |               |               |               |               |               |               |               |                                      |               |               |               |               |               |               |               |               |               |               |               |               |               |               |               |               |                                              |               |               |               |               |               |               |               |               |               |               |               |               |               |               |               |               |                                             |               |               |               |               |               |               |               |               |               |               |               |               |               |               |               |               |                                            |               |               |               |               |               |               |               |               |               |               |               |               |               |               |               |               |                                                 |             |             |             |             |             |             |             |             |            |            |            |            |              |              |              |              |                                              |               |               |               |               |               |               |               |               |               |               |               |               |               |               |               |               |                                                 |               |               |               |               |               |               |               |               |               |               |               |               |               |               |               |               |                          |               |               |               |               |               |               |               |               |               |               |               |               |               |               |               |               |                                           |               |               |               |               |               |               |               |               |               |               |               |               |               |               |               |               |                          |               |               |               |               |               |               |               |               |               |               |               |               |               |               |               |               |                                      |               |               |               |               |               |               |               |               |               |               |               |               |               |               |               |               |                                              |               |               |               |               |               |               |               |               |               |               |               |               |               |               |               |               |                                           |            |            |             |             |             |             |             |             |             |             |             |             |               |               |               |               |                                                 |               |               |               |               |               |               |               |               |               |               |               |               |               |               |               |               |                                              |               |               |               |               |               |               |               |               |               |               |               |               |               |               |               |               |                                             |               |               |             |             |             |             |             |             |               |               |               |               |               |               |               |               |                                            |               |               |               |               |               |               |               |               |             |             |               |               |               |               |               |               |                                                 |             |             |             |             |             |             |             |             |             |             |             |             |               |               |               |               |                                           |               |               |             |             |             |             |             |             |               |               |               |               |               |               |               |               |                          |               |               |               |               |               |               |               |               |               |               |               |               |               |               |               |               |                                      |               |               |               |               |               |               |               |               |               |               |               |               |               |               |               |               |                                              |             |             |             |             |             |             |             |             |             |             |            |            |               |               |               |               |                          |               |               |               |               |               |               |               |               |               |               |               |               |               |               |               |               |                                                 |               |               |               |               |               |               |               |               |               |               |               |               |               |               |               |               |                                              |             |             |             |             |             |             |             |             |             |             |               |               |               |               |               |               |                      |               |               |             |             |             |             |             |             |               |               |               |               |               |               |               |               |                                                 |               |               |               |               |               |               |               |               |             |             |               |               |               |               |               |               |                                        |             |             |             |             |             |             |             |             |             |             |               |               |               |               |               |               |                                           |               |               |             |             |             |             |             |             |               |               |               |               |               |               |               |               |                          |               |               |               |               |               |               |               |               |               |               |               |               |               |               |               |               |              |               |               |               |               |               |               |               |               |               |               |               |               |               |               |               |               |                                             |           |           |            |            |            |            |            |            |           |           |           |           |            |            |            |            |                          |               |               |               |               |               |               |               |               |               |               |               |               |               |               |               |               |                                                 |               |               |               |               |               |               |               |               |               |               |               |               |               |               |               |               |                                             |             |             |             |             |             |             |             |             |             |             |               |               |               |               |               |               |                      |            |            |            |            |            |            |            |            |            |            |            |            |            |              |              |              |                                                 |           |           |           |           |           |           |           |           |           |           |            |            |            |            |            |            |         |             |             |             |             |             |             |             |             |             |             |               |               |               |               |               |               |                      |           |           |           |           |           |           |           |           |           |           |           |           |            |            |            |  |
| South                                           | 2,065 (66.0%)         | 2,065 (66.0%)         | 2,065 (47.5%)         | 2,065 (47.5%)         | 2,065 (47.5%)         | 2,065 (47.5%)         | 2,065 (47.5%)         | 2,065 (47.5%)         | 1,856 (42.8%)         | 1,856 (42.8%)         | 2,126 (36.5%)         | 2,126 (36.5%)         | 7,372 (41.3%)          | 7,372 (41.3%)          | 7,372 (41.3%)          | 7,372 (41.3%)          |                                            |               |               |               |               |               |               |               |               |               |               |               |               |               |               |               |               |                      |               |               |               |               |               |               |               |               |               |               |               |               |               |               |               |               |                                           |               |               |               |               |               |               |               |               |               |               |               |               |               |               |               |               |                             |               |               |               |               |               |               |               |               |               |               |               |               |               |               |               |               |                            |             |             |               |               |               |               |               |               |               |               |               |               |               |               |               |               |                                      |               |               |               |               |               |               |               |               |               |               |               |               |                |                |                |                |                                              |               |               |               |               |               |               |               |               |               |               |               |               |               |               |               |               |                                            |               |               |               |               |               |               |               |               |               |               |               |               |               |               |               |               |                                              |               |               |               |               |               |               |               |               |               |               |               |               |                |                |                |                |                                           |               |               |               |               |               |               |               |               |               |               |               |               |               |               |               |               |                          |               |               |               |               |               |               |               |               |               |               |               |               |               |               |               |               |                                            |             |             |               |               |               |               |               |               |               |               |               |               |               |               |               |               |                             |               |               |               |               |               |               |               |               |               |               |               |               |               |               |               |               |                                           |               |               |               |               |               |               |               |               |               |               |               |               |               |               |               |               |                                      |               |               |               |               |               |               |               |               |               |               |               |               |               |               |               |               |                                              |               |               |               |               |               |               |               |               |               |               |               |               |               |               |               |               |                                             |               |               |               |               |               |               |               |               |               |               |               |               |               |               |               |               |                                            |               |               |               |               |               |               |               |               |               |               |               |               |               |               |               |               |                                                 |             |             |             |             |             |             |             |             |            |            |            |            |              |              |              |              |                                              |               |               |               |               |               |               |               |               |               |               |               |               |               |               |               |               |                                                 |               |               |               |               |               |               |               |               |               |               |               |               |               |               |               |               |                          |               |               |               |               |               |               |               |               |               |               |               |               |               |               |               |               |                                           |               |               |               |               |               |               |               |               |               |               |               |               |               |               |               |               |                          |               |               |               |               |               |               |               |               |               |               |               |               |               |               |               |               |                                      |               |               |               |               |               |               |               |               |               |               |               |               |               |               |               |               |                                              |               |               |               |               |               |               |               |               |               |               |               |               |               |               |               |               |                                           |            |            |             |             |             |             |             |             |             |             |             |             |               |               |               |               |                                                 |               |               |               |               |               |               |               |               |               |               |               |               |               |               |               |               |                                              |               |               |               |               |               |               |               |               |               |               |               |               |               |               |               |               |                                             |               |               |             |             |             |             |             |             |               |               |               |               |               |               |               |               |                                            |               |               |               |               |               |               |               |               |             |             |               |               |               |               |               |               |                                                 |             |             |             |             |             |             |             |             |             |             |             |             |               |               |               |               |                                           |               |               |             |             |             |             |             |             |               |               |               |               |               |               |               |               |                          |               |               |               |               |               |               |               |               |               |               |               |               |               |               |               |               |                                      |               |               |               |               |               |               |               |               |               |               |               |               |               |               |               |               |                                              |             |             |             |             |             |             |             |             |             |             |            |            |               |               |               |               |                          |               |               |               |               |               |               |               |               |               |               |               |               |               |               |               |               |                                                 |               |               |               |               |               |               |               |               |               |               |               |               |               |               |               |               |                                              |             |             |             |             |             |             |             |             |             |             |               |               |               |               |               |               |                      |               |               |             |             |             |             |             |             |               |               |               |               |               |               |               |               |                                                 |               |               |               |               |               |               |               |               |             |             |               |               |               |               |               |               |                                        |             |             |             |             |             |             |             |             |             |             |               |               |               |               |               |               |                                           |               |               |             |             |             |             |             |             |               |               |               |               |               |               |               |               |                          |               |               |               |               |               |               |               |               |               |               |               |               |               |               |               |               |              |               |               |               |               |               |               |               |               |               |               |               |               |               |               |               |               |                                             |           |           |            |            |            |            |            |            |           |           |           |           |            |            |            |            |                          |               |               |               |               |               |               |               |               |               |               |               |               |               |               |               |               |                                                 |               |               |               |               |               |               |               |               |               |               |               |               |               |               |               |               |                                             |             |             |             |             |             |             |             |             |             |             |               |               |               |               |               |               |                      |            |            |            |            |            |            |            |            |            |            |            |            |            |              |              |              |                                                 |           |           |           |           |           |           |           |           |           |           |            |            |            |            |            |            |         |             |             |             |             |             |             |             |             |             |             |               |               |               |               |               |               |                      |           |           |           |           |           |           |           |           |           |           |           |           |            |            |            |  |
| West                                            | 265 (8.0%)            | 265 (8.0%)            | 480 (11.0%)           | 480 (11.0%)           | 480 (11.0%)           | 480 (11.0%)           | 480 (11.0%)           | 480 (11.0%)           | 856 (20.2%)           | 856 (20.2%)           | 588 (10.3%)           | 588 (10.3%)           | 2,189 (12.2%)          | 2,189 (12.2%)          | 2,189 (12.2%)          | 2,189 (12.2%)          |                                            |               |               |               |               |               |               |               |               |               |               |               |               |               |               |               |               |                      |               |               |               |               |               |               |               |               |               |               |               |               |               |               |               |               |                                           |               |               |               |               |               |               |               |               |               |               |               |               |               |               |               |               |                             |               |               |               |               |               |               |               |               |               |               |               |               |               |               |               |               |                            |             |             |               |               |               |               |               |               |               |               |               |               |               |               |               |               |                                      |               |               |               |               |               |               |               |               |               |               |               |               |                |                |                |                |                                              |               |               |               |               |               |               |               |               |               |               |               |               |               |               |               |               |                                            |               |               |               |               |               |               |               |               |               |               |               |               |               |               |               |               |                                              |               |               |               |               |               |               |               |               |               |               |               |               |                |                |                |                |                                           |               |               |               |               |               |               |               |               |               |               |               |               |               |               |               |               |                          |               |               |               |               |               |               |               |               |               |               |               |               |               |               |               |               |                                            |             |             |               |               |               |               |               |               |               |               |               |               |               |               |               |               |                             |               |               |               |               |               |               |               |               |               |               |               |               |               |               |               |               |                                           |               |               |               |               |               |               |               |               |               |               |               |               |               |               |               |               |                                      |               |               |               |               |               |               |               |               |               |               |               |               |               |               |               |               |                                              |               |               |               |               |               |               |               |               |               |               |               |               |               |               |               |               |                                             |               |               |               |               |               |               |               |               |               |               |               |               |               |               |               |               |                                            |               |               |               |               |               |               |               |               |               |               |               |               |               |               |               |               |                                                 |             |             |             |             |             |             |             |             |            |            |            |            |              |              |              |              |                                              |               |               |               |               |               |               |               |               |               |               |               |               |               |               |               |               |                                                 |               |               |               |               |               |               |               |               |               |               |               |               |               |               |               |               |                          |               |               |               |               |               |               |               |               |               |               |               |               |               |               |               |               |                                           |               |               |               |               |               |               |               |               |               |               |               |               |               |               |               |               |                          |               |               |               |               |               |               |               |               |               |               |               |               |               |               |               |               |                                      |               |               |               |               |               |               |               |               |               |               |               |               |               |               |               |               |                                              |               |               |               |               |               |               |               |               |               |               |               |               |               |               |               |               |                                           |            |            |             |             |             |             |             |             |             |             |             |             |               |               |               |               |                                                 |               |               |               |               |               |               |               |               |               |               |               |               |               |               |               |               |                                              |               |               |               |               |               |               |               |               |               |               |               |               |               |               |               |               |                                             |               |               |             |             |             |             |             |             |               |               |               |               |               |               |               |               |                                            |               |               |               |               |               |               |               |               |             |             |               |               |               |               |               |               |                                                 |             |             |             |             |             |             |             |             |             |             |             |             |               |               |               |               |                                           |               |               |             |             |             |             |             |             |               |               |               |               |               |               |               |               |                          |               |               |               |               |               |               |               |               |               |               |               |               |               |               |               |               |                                      |               |               |               |               |               |               |               |               |               |               |               |               |               |               |               |               |                                              |             |             |             |             |             |             |             |             |             |             |            |            |               |               |               |               |                          |               |               |               |               |               |               |               |               |               |               |               |               |               |               |               |               |                                                 |               |               |               |               |               |               |               |               |               |               |               |               |               |               |               |               |                                              |             |             |             |             |             |             |             |             |             |             |               |               |               |               |               |               |                      |               |               |             |             |             |             |             |             |               |               |               |               |               |               |               |               |                                                 |               |               |               |               |               |               |               |               |             |             |               |               |               |               |               |               |                                        |             |             |             |             |             |             |             |             |             |             |               |               |               |               |               |               |                                           |               |               |             |             |             |             |             |             |               |               |               |               |               |               |               |               |                          |               |               |               |               |               |               |               |               |               |               |               |               |               |               |               |               |              |               |               |               |               |               |               |               |               |               |               |               |               |               |               |               |               |                                             |           |           |            |            |            |            |            |            |           |           |           |           |            |            |            |            |                          |               |               |               |               |               |               |               |               |               |               |               |               |               |               |               |               |                                                 |               |               |               |               |               |               |               |               |               |               |               |               |               |               |               |               |                                             |             |             |             |             |             |             |             |             |             |             |               |               |               |               |               |               |                      |            |            |            |            |            |            |            |            |            |            |            |            |            |              |              |              |                                                 |           |           |           |           |           |           |           |           |           |           |            |            |            |            |            |            |         |             |             |             |             |             |             |             |             |             |             |               |               |               |               |               |               |                      |           |           |           |           |           |           |           |           |           |           |           |           |            |            |            |  |
| Other                                           | —                     | —                     | 15 (0.3%)             | 15 (0.3%)             | 15 (0.3%)             | 15 (0.3%)             | 15 (0.3%)             | 15 (0.3%)             | —                     | —                     | —                     | —                     | 15 (0.1%)              | 15 (0.1%)              | 15 (0.1%)              | 15 (0.1%)              |                                            |               |               |               |               |               |               |               |               |               |               |               |               |               |               |               |               |                      |               |               |               |               |               |               |               |               |               |               |               |               |               |               |               |               |                                           |               |               |               |               |               |               |               |               |               |               |               |               |               |               |               |               |                             |               |               |               |               |               |               |               |               |               |               |               |               |               |               |               |               |                            |             |             |               |               |               |               |               |               |               |               |               |               |               |               |               |               |                                      |               |               |               |               |               |               |               |               |               |               |               |               |                |                |                |                |                                              |               |               |               |               |               |               |               |               |               |               |               |               |               |               |               |               |                                            |               |               |               |               |               |               |               |               |               |               |               |               |               |               |               |               |                                              |               |               |               |               |               |               |               |               |               |               |               |               |                |                |                |                |                                           |               |               |               |               |               |               |               |               |               |               |               |               |               |               |               |               |                          |               |               |               |               |               |               |               |               |               |               |               |               |               |               |               |               |                                            |             |             |               |               |               |               |               |               |               |               |               |               |               |               |               |               |                             |               |               |               |               |               |               |               |               |               |               |               |               |               |               |               |               |                                           |               |               |               |               |               |               |               |               |               |               |               |               |               |               |               |               |                                      |               |               |               |               |               |               |               |               |               |               |               |               |               |               |               |               |                                              |               |               |               |               |               |               |               |               |               |               |               |               |               |               |               |               |                                             |               |               |               |               |               |               |               |               |               |               |               |               |               |               |               |               |                                            |               |               |               |               |               |               |               |               |               |               |               |               |               |               |               |               |                                                 |             |             |             |             |             |             |             |             |            |            |            |            |              |              |              |              |                                              |               |               |               |               |               |               |               |               |               |               |               |               |               |               |               |               |                                                 |               |               |               |               |               |               |               |               |               |               |               |               |               |               |               |               |                          |               |               |               |               |               |               |               |               |               |               |               |               |               |               |               |               |                                           |               |               |               |               |               |               |               |               |               |               |               |               |               |               |               |               |                          |               |               |               |               |               |               |               |               |               |               |               |               |               |               |               |               |                                      |               |               |               |               |               |               |               |               |               |               |               |               |               |               |               |               |                                              |               |               |               |               |               |               |               |               |               |               |               |               |               |               |               |               |                                           |            |            |             |             |             |             |             |             |             |             |             |             |               |               |               |               |                                                 |               |               |               |               |               |               |               |               |               |               |               |               |               |               |               |               |                                              |               |               |               |               |               |               |               |               |               |               |               |               |               |               |               |               |                                             |               |               |             |             |             |             |             |             |               |               |               |               |               |               |               |               |                                            |               |               |               |               |               |               |               |               |             |             |               |               |               |               |               |               |                                                 |             |             |             |             |             |             |             |             |             |             |             |             |               |               |               |               |                                           |               |               |             |             |             |             |             |             |               |               |               |               |               |               |               |               |                          |               |               |               |               |               |               |               |               |               |               |               |               |               |               |               |               |                                      |               |               |               |               |               |               |               |               |               |               |               |               |               |               |               |               |                                              |             |             |             |             |             |             |             |             |             |             |            |            |               |               |               |               |                          |               |               |               |               |               |               |               |               |               |               |               |               |               |               |               |               |                                                 |               |               |               |               |               |               |               |               |               |               |               |               |               |               |               |               |                                              |             |             |             |             |             |             |             |             |             |             |               |               |               |               |               |               |                      |               |               |             |             |             |             |             |             |               |               |               |               |               |               |               |               |                                                 |               |               |               |               |               |               |               |               |             |             |               |               |               |               |               |               |                                        |             |             |             |             |             |             |             |             |             |             |               |               |               |               |               |               |                                           |               |               |             |             |             |             |             |             |               |               |               |               |               |               |               |               |                          |               |               |               |               |               |               |               |               |               |               |               |               |               |               |               |               |              |               |               |               |               |               |               |               |               |               |               |               |               |               |               |               |               |                                             |           |           |            |            |            |            |            |            |           |           |           |           |            |            |            |            |                          |               |               |               |               |               |               |               |               |               |               |               |               |               |               |               |               |                                                 |               |               |               |               |               |               |               |               |               |               |               |               |               |               |               |               |                                             |             |             |             |             |             |             |             |             |             |             |               |               |               |               |               |               |                      |            |            |            |            |            |            |            |            |            |            |            |            |            |              |              |              |                                                 |           |           |           |           |           |           |           |           |           |           |            |            |            |            |            |            |         |             |             |             |             |             |             |             |             |             |             |               |               |               |               |               |               |                      |           |           |           |           |           |           |           |           |           |           |           |           |            |            |            |  |
| Missing                                         | —                     | —                     | —                     | —                     | —                     | —                     | —                     | —                     | —                     | —                     | —                     | —                     | —                      | —                      | —                      | —                      |                                            |               |               |               |               |               |               |               |               |               |               |               |               |               |               |               |               |                      |               |               |               |               |               |               |               |               |               |               |               |               |               |               |               |               |                                           |               |               |               |               |               |               |               |               |               |               |               |               |               |               |               |               |                             |               |               |               |               |               |               |               |               |               |               |               |               |               |               |               |               |                            |             |             |               |               |               |               |               |               |               |               |               |               |               |               |               |               |                                      |               |               |               |               |               |               |               |               |               |               |               |               |                |                |                |                |                                              |               |               |               |               |               |               |               |               |               |               |               |               |               |               |               |               |                                            |               |               |               |               |               |               |               |               |               |               |               |               |               |               |               |               |                                              |               |               |               |               |               |               |               |               |               |               |               |               |                |                |                |                |                                           |               |               |               |               |               |               |               |               |               |               |               |               |               |               |               |               |                          |               |               |               |               |               |               |               |               |               |               |               |               |               |               |               |               |                                            |             |             |               |               |               |               |               |               |               |               |               |               |               |               |               |               |                             |               |               |               |               |               |               |               |               |               |               |               |               |               |               |               |               |                                           |               |               |               |               |               |               |               |               |               |               |               |               |               |               |               |               |                                      |               |               |               |               |               |               |               |               |               |               |               |               |               |               |               |               |                                              |               |               |               |               |               |               |               |               |               |               |               |               |               |               |               |               |                                             |               |               |               |               |               |               |               |               |               |               |               |               |               |               |               |               |                                            |               |               |               |               |               |               |               |               |               |               |               |               |               |               |               |               |                                                 |             |             |             |             |             |             |             |             |            |            |            |            |              |              |              |              |                                              |               |               |               |               |               |               |               |               |               |               |               |               |               |               |               |               |                                                 |               |               |               |               |               |               |               |               |               |               |               |               |               |               |               |               |                          |               |               |               |               |               |               |               |               |               |               |               |               |               |               |               |               |                                           |               |               |               |               |               |               |               |               |               |               |               |               |               |               |               |               |                          |               |               |               |               |               |               |               |               |               |               |               |               |               |               |               |               |                                      |               |               |               |               |               |               |               |               |               |               |               |               |               |               |               |               |                                              |               |               |               |               |               |               |               |               |               |               |               |               |               |               |               |               |                                           |            |            |             |             |             |             |             |             |             |             |             |             |               |               |               |               |                                                 |               |               |               |               |               |               |               |               |               |               |               |               |               |               |               |               |                                              |               |               |               |               |               |               |               |               |               |               |               |               |               |               |               |               |                                             |               |               |             |             |             |             |             |             |               |               |               |               |               |               |               |               |                                            |               |               |               |               |               |               |               |               |             |             |               |               |               |               |               |               |                                                 |             |             |             |             |             |             |             |             |             |             |             |             |               |               |               |               |                                           |               |               |             |             |             |             |             |             |               |               |               |               |               |               |               |               |                          |               |               |               |               |               |               |               |               |               |               |               |               |               |               |               |               |                                      |               |               |               |               |               |               |               |               |               |               |               |               |               |               |               |               |                                              |             |             |             |             |             |             |             |             |             |             |            |            |               |               |               |               |                          |               |               |               |               |               |               |               |               |               |               |               |               |               |               |               |               |                                                 |               |               |               |               |               |               |               |               |               |               |               |               |               |               |               |               |                                              |             |             |             |             |             |             |             |             |             |             |               |               |               |               |               |               |                      |               |               |             |             |             |             |             |             |               |               |               |               |               |               |               |               |                                                 |               |               |               |               |               |               |               |               |             |             |               |               |               |               |               |               |                                        |             |             |             |             |             |             |             |             |             |             |               |               |               |               |               |               |                                           |               |               |             |             |             |             |             |             |               |               |               |               |               |               |               |               |                          |               |               |               |               |               |               |               |               |               |               |               |               |               |               |               |               |              |               |               |               |               |               |               |               |               |               |               |               |               |               |               |               |               |                                             |           |           |            |            |            |            |            |            |           |           |           |           |            |            |            |            |                          |               |               |               |               |               |               |               |               |               |               |               |               |               |               |               |               |                                                 |               |               |               |               |               |               |               |               |               |               |               |               |               |               |               |               |                                             |             |             |             |             |             |             |             |             |             |             |               |               |               |               |               |               |                      |            |            |            |            |            |            |            |            |            |            |            |            |            |              |              |              |                                                 |           |           |           |           |           |           |           |           |           |           |            |            |            |            |            |            |         |             |             |             |             |             |             |             |             |             |             |               |               |               |               |               |               |                      |           |           |           |           |           |           |           |           |           |           |           |           |            |            |            |  |
| Comorbidity Profile                             |                       |                       |                       |                       |                       |                       |                       |                       |                       |                       |                       |                       |                        |                        |                        |                        | Deyo-Charlson Comorbidity Index, mean (SD) | 2.0 (2.1)     | 2.1 (2.1)     | 0.7 (1.2)     | 0.6 (1.2)     | 0.6 (1.2)     | 0.6 (1.2)     | 0.6 (1.2)     | 0.6 (1.2)     | 1.3 (1.8)     | 1.3 (1.8)     | 0.6 (1.2)     | 0.6 (1.2)     | 1.0 (1.7)     | 1.0 (1.7)     | 1.0 (1.7)     | 1.0 (1.7)     | Comorbidities, n (%) |               |               |               |               |               |               |               |               |               |               |               |               |               |               |               |               | Acquired immunodeficiency syndrome (AIDS) | 11 (0.4%)     | 11 (0.4%)     | 10 (0.2%)     | 11 (0.3%)     | 11 (0.3%)     | 11 (0.3%)     | 11 (0.3%)     | 11 (0.3%)     | 19 (0.4%)     | 19 (0.4%)     | 27 (0.5%)     | 26 (0.4%)     | 64 (0.4%)     | 64 (0.4%)     | 64 (0.4%)     | 64 (0.4%)     | Alcohol abuse               | 148 (4.5%)    | 148 (4.5%)    | 87 (2.0%)     | 86 (2.0%)     | 86 (2.0%)     | 86 (2.0%)     | 86 (2.0%)     | 86 (2.0%)     | 106 (2.4%)    | 106 (2.4%)    | 205 (3.4%)    | 205 (3.4%)    | 591 (3.3%)    | 591 (3.3%)    | 591 (3.3%)    | 591 (3.3%)    | Anemia                     | 811 (24.4%) | 811 (24.4%) | 795 (18.2%)   | 795 (18.2%)   | 795 (18.2%)   | 795 (18.2%)   | 795 (18.2%)   | 795 (18.2%)   | 701 (16.5%)   | 701 (16.5%)   | 686 (11.5%)   | 686 (11.5%)   | 2,562 (14.3%) | 2,562 (14.3%) | 2,562 (14.3%) | 2,562 (14.3%) | Bleeding                             | 66 (2.0%)     | 67 (2.1%)     | 17 (0.4%)     | 16 (0.4%)     | 16 (0.4%)     | 16 (0.4%)     | 16 (0.4%)     | 16 (0.4%)     | 65 (1.5%)     | 65 (1.5%)     | 81 (1.4%)     | 77 (1.3%)     | 261 (1.5%)     | 261 (1.5%)     | 261 (1.5%)     | 261 (1.5%)     | Central venous catheter                      | 152 (4.6%)    | 137 (4.1%)    | 99 (2.3%)     | 99 (2.3%)     | 99 (2.3%)     | 99 (2.3%)     | 99 (2.3%)     | 99 (2.3%)     | 181 (4.2%)    | 181 (4.2%)    | 255 (4.3%)    | 229 (3.9%)    | 689 (3.9%)    | 689 (3.9%)    | 689 (3.9%)    | 689 (3.9%)    | Cerebrovascular disease (stroke/TIA)       | 406 (12.4%)   | 406 (12.4%)   | 276 (6.3%)    | 276 (6.3%)    | 276 (6.3%)    | 276 (6.3%)    | 276 (6.3%)    | 276 (6.3%)    | 317 (7.3%)    | 317 (7.3%)    | 323 (5.5%)    | 323 (5.5%)    | 1,242 (6.9%)  | 1,242 (6.9%)  | 1,242 (6.9%)  | 1,242 (6.9%)  | Chronic obstructive pulmonary disease (COPD) | 876 (26.4%)   | 876 (26.4%)   | 888 (20.0%)   | 888 (20.0%)   | 888 (20.0%)   | 888 (20.0%)   | 888 (20.0%)   | 888 (20.0%)   | 598 (13.8%)   | 598 (13.8%)   | 398 (6.7%)    | 398 (6.7%)    | 2,155 (12.1%)  | 2,155 (12.1%)  | 2,155 (12.1%)  | 2,155 (12.1%)  | Coagulopathy                              | 38 (1.1%)     | 49 (1.5%)     | 38 (0.9%)     | 30 (0.7%)     | 30 (0.7%)     | 30 (0.7%)     | 30 (0.7%)     | 30 (0.7%)     | 56 (1.3%)     | 56 (1.3%)     | 51 (0.9%)     | 51 (0.9%)     | 221 (1.2%)    | 221 (1.2%)    | 221 (1.2%)    | 221 (1.2%)    | Congestive heart failure | 1,127 (34.0%) | 1,127 (34.0%) | 1,114 (25.0%) | 1,114 (25.0%) | 1,114 (25.0%) | 1,114 (25.0%) | 1,114 (25.0%) | 1,114 (25.0%) | 924 (21.2%)   | 924 (21.2%)   | 874 (14.7%)   | 874 (14.7%)   | 3,466 (19.4%) | 3,466 (19.4%) | 3,466 (19.4%) | 3,466 (19.4%) | Ischemic heart/coronary artery disease     | 217 (7.1%)  | 184 (5.5%)  | 541 (12.2%)   | 441 (10.2%)   | 441 (10.2%)   | 441 (10.2%)   | 441 (10.2%)   | 441 (10.2%)   | 152 (3.5%)    | 152 (3.5%)    | 25 (0.4%)     | 21 (0.4%)     | 508 (2.8%)    | 425 (2.4%)    | 508 (2.8%)    | 425 (2.4%)    | Dementia                    | 1,269 (39.4%) | 1,269 (39.4%) | 942 (21.6%)   | 942 (21.6%)   | 942 (21.6%)   | 942 (21.6%)   | 942 (21.6%)   | 942 (21.6%)   | 1,100 (25.0%) | 1,100 (25.0%) | 1,040 (17.6%) | 1,040 (17.6%) | 4,342 (24.3%) | 4,342 (24.3%) | 4,342 (24.3%) | 4,342 (24.3%) | Diabetes                                  | 708 (22.1%)   | 708 (22.1%)   | 1,113 (25.3%) | 1,113 (25.3%) | 1,113 (25.3%) | 1,113 (25.3%) | 1,113 (25.3%) | 1,113 (25.3%) | 978 (22.5%)   | 978 (22.5%)   | 1,031 (17.8%) | 1,031 (17.8%) | 3,271 (18.3%) | 3,271 (18.3%) | 3,271 (18.3%) | 3,271 (18.3%) | Disability                           | 170 (5.1%)    | 170 (5.1%)    | 436 (10.0%)   | 436 (10.0%)   | 436 (10.0%)   | 436 (10.0%)   | 436 (10.0%)   | 436 (10.0%)   | 323 (7.4%)    | 323 (7.4%)    | 371 (6.4%)    | 371 (6.4%)    | 1,669 (9.3%)  | 1,669 (9.3%)  | 1,669 (9.3%)  | 1,669 (9.3%)  | Fractures involving the lower extremities    | 76 (2.3%)     | 76 (2.3%)     | 217 (5.0%)    | 217 (5.0%)    | 217 (5.0%)    | 217 (5.0%)    | 217 (5.0%)    | 217 (5.0%)    | 44 (1.0%)     | 44 (1.0%)     | 43 (0.8%)     | 43 (0.8%)     | 191 (1.1%)    | 191 (1.1%)    | 191 (1.1%)    | 191 (1.1%)    | Hemiplegia or paraplegia                    | 2,150 (64.8%) | 2,150 (64.8%) | 1,747 (40.1%) | 1,668 (38.3%) | 1,668 (38.3%) | 1,668 (38.3%) | 1,668 (38.3%) | 1,668 (38.3%) | 2,120 (50.0%) | 2,120 (50.0%) | 1,907 (32.0%) | 1,907 (32.0%) | 7,875 (44.0%) | 7,875 (44.0%) | 7,875 (44.0%) | 7,875 (44.0%) | Hypertension                               | 2,680 (80.8%) | 2,680 (80.8%) | 2,648 (79.6%) | 2,648 (79.6%) | 2,648 (79.6%) | 2,648 (79.6%) | 2,648 (79.6%) | 2,648 (79.6%) | 2,499 (58.9%) | 2,499 (58.9%) | 2,054 (34.3%) | 2,054 (34.3%) | 9,799 (54.8%) | 9,799 (54.8%) | 9,799 (54.8%) | 9,799 (54.8%) | Hypertension<br>inflammatory bowel syndrome     | 38 (1.1%)   | 35 (1.1%)   | 32 (0.7%)   | 37 (0.8%)   | 37 (0.8%)   | 37 (0.8%)   | 37 (0.8%)   | 37 (0.8%)   | 29 (0.7%)  | 29 (0.7%)  | 80 (1.3%)  | 94 (1.6%)  | 179 (1.0%)   | 190 (1.1%)   | 190 (1.1%)   | 190 (1.1%)   | Liver disease                                | 235 (7.1%)    | 246 (7.4%)    | 154 (3.5%)    | 154 (3.5%)    | 154 (3.5%)    | 154 (3.5%)    | 154 (3.5%)    | 154 (3.5%)    | 267 (6.3%)    | 267 (6.3%)    | 361 (6.1%)    | 361 (6.1%)    | 998 (5.6%)    | 1,031 (5.8%)  | 1,031 (5.8%)  | 1,031 (5.8%)  | Malignancy (excluding non-melanoma skin cancer) | 50 (1.5%)     | 46 (1.4%)     | 21 (0.5%)     | 21 (0.5%)     | 21 (0.5%)     | 21 (0.5%)     | 21 (0.5%)     | 21 (0.5%)     | 62 (1.4%)     | 62 (1.4%)     | 216 (3.7%)    | 216 (3.7%)    | 200 (1.1%)    | 200 (1.1%)    | 200 (1.1%)    | 200 (1.1%)    | Obesity                  | 859 (25.9%)   | 843 (25.4%)   | 565 (13.0%)   | 580 (13.3%)   | 580 (13.3%)   | 580 (13.3%)   | 580 (13.3%)   | 580 (13.3%)   | 859 (20.2%)   | 859 (20.2%)   | 1,267 (21.3%) | 1,267 (21.3%) | 3,549 (19.9%) | 3,549 (19.9%) | 3,549 (19.9%) | 3,549 (19.9%) | Peptic ulcer disease                      | 52 (1.6%)     | 46 (1.4%)     | 39 (0.9%)     | 39 (0.9%)     | 39 (0.9%)     | 39 (0.9%)     | 39 (0.9%)     | 39 (0.9%)     | 39 (0.9%)     | 39 (0.9%)     | 41 (0.7%)     | 41 (0.7%)     | 160 (0.9%)    | 154 (0.9%)    | 154 (0.9%)    |               |                          |               |               |               |               |               |               |               |               |               |               |               |               |               |               |               |               |                                      |               |               |               |               |               |               |               |               |               |               |               |               |               |               |               |               |                                              |               |               |               |               |               |               |               |               |               |               |               |               |               |               |               |               |                                           |            |            |             |             |             |             |             |             |             |             |             |             |               |               |               |               |                                                 |               |               |               |               |               |               |               |               |               |               |               |               |               |               |               |               |                                              |               |               |               |               |               |               |               |               |               |               |               |               |               |               |               |               |                                             |               |               |             |             |             |             |             |             |               |               |               |               |               |               |               |               |                                            |               |               |               |               |               |               |               |               |             |             |               |               |               |               |               |               |                                                 |             |             |             |             |             |             |             |             |             |             |             |             |               |               |               |               |                                           |               |               |             |             |             |             |             |             |               |               |               |               |               |               |               |               |                          |               |               |               |               |               |               |               |               |               |               |               |               |               |               |               |               |                                      |               |               |               |               |               |               |               |               |               |               |               |               |               |               |               |               |                                              |             |             |             |             |             |             |             |             |             |             |            |            |               |               |               |               |                          |               |               |               |               |               |               |               |               |               |               |               |               |               |               |               |               |                                                 |               |               |               |               |               |               |               |               |               |               |               |               |               |               |               |               |                                              |             |             |             |             |             |             |             |             |             |             |               |               |               |               |               |               |                      |               |               |             |             |             |             |             |             |               |               |               |               |               |               |               |               |                                                 |               |               |               |               |               |               |               |               |             |             |               |               |               |               |               |               |                                        |             |             |             |             |             |             |             |             |             |             |               |               |               |               |               |               |                                           |               |               |             |             |             |             |             |             |               |               |               |               |               |               |               |               |                          |               |               |               |               |               |               |               |               |               |               |               |               |               |               |               |               |              |               |               |               |               |               |               |               |               |               |               |               |               |               |               |               |               |                                             |           |           |            |            |            |            |            |            |           |           |           |           |            |            |            |            |                          |               |               |               |               |               |               |               |               |               |               |               |               |               |               |               |               |                                                 |               |               |               |               |               |               |               |               |               |               |               |               |               |               |               |               |                                             |             |             |             |             |             |             |             |             |             |             |               |               |               |               |               |               |                      |            |            |            |            |            |            |            |            |            |            |            |            |            |              |              |              |                                                 |           |           |           |           |           |           |           |           |           |           |            |            |            |            |            |            |         |             |             |             |             |             |             |             |             |             |             |               |               |               |               |               |               |                      |           |           |           |           |           |           |           |           |           |           |           |           |            |            |            |  |
| Deyo-Charlson Comorbidity Index, mean (SD)      | 2.0 (2.1)             | 2.1 (2.1)             | 0.7 (1.2)             | 0.6 (1.2)             | 0.6 (1.2)             | 0.6 (1.2)             | 0.6 (1.2)             | 0.6 (1.2)             | 1.3 (1.8)             | 1.3 (1.8)             | 0.6 (1.2)             | 0.6 (1.2)             | 1.0 (1.7)              | 1.0 (1.7)              | 1.0 (1.7)              | 1.0 (1.7)              |                                            |               |               |               |               |               |               |               |               |               |               |               |               |               |               |               |               |                      |               |               |               |               |               |               |               |               |               |               |               |               |               |               |               |               |                                           |               |               |               |               |               |               |               |               |               |               |               |               |               |               |               |               |                             |               |               |               |               |               |               |               |               |               |               |               |               |               |               |               |               |                            |             |             |               |               |               |               |               |               |               |               |               |               |               |               |               |               |                                      |               |               |               |               |               |               |               |               |               |               |               |               |                |                |                |                |                                              |               |               |               |               |               |               |               |               |               |               |               |               |               |               |               |               |                                            |               |               |               |               |               |               |               |               |               |               |               |               |               |               |               |               |                                              |               |               |               |               |               |               |               |               |               |               |               |               |                |                |                |                |                                           |               |               |               |               |               |               |               |               |               |               |               |               |               |               |               |               |                          |               |               |               |               |               |               |               |               |               |               |               |               |               |               |               |               |                                            |             |             |               |               |               |               |               |               |               |               |               |               |               |               |               |               |                             |               |               |               |               |               |               |               |               |               |               |               |               |               |               |               |               |                                           |               |               |               |               |               |               |               |               |               |               |               |               |               |               |               |               |                                      |               |               |               |               |               |               |               |               |               |               |               |               |               |               |               |               |                                              |               |               |               |               |               |               |               |               |               |               |               |               |               |               |               |               |                                             |               |               |               |               |               |               |               |               |               |               |               |               |               |               |               |               |                                            |               |               |               |               |               |               |               |               |               |               |               |               |               |               |               |               |                                                 |             |             |             |             |             |             |             |             |            |            |            |            |              |              |              |              |                                              |               |               |               |               |               |               |               |               |               |               |               |               |               |               |               |               |                                                 |               |               |               |               |               |               |               |               |               |               |               |               |               |               |               |               |                          |               |               |               |               |               |               |               |               |               |               |               |               |               |               |               |               |                                           |               |               |               |               |               |               |               |               |               |               |               |               |               |               |               |               |                          |               |               |               |               |               |               |               |               |               |               |               |               |               |               |               |               |                                      |               |               |               |               |               |               |               |               |               |               |               |               |               |               |               |               |                                              |               |               |               |               |               |               |               |               |               |               |               |               |               |               |               |               |                                           |            |            |             |             |             |             |             |             |             |             |             |             |               |               |               |               |                                                 |               |               |               |               |               |               |               |               |               |               |               |               |               |               |               |               |                                              |               |               |               |               |               |               |               |               |               |               |               |               |               |               |               |               |                                             |               |               |             |             |             |             |             |             |               |               |               |               |               |               |               |               |                                            |               |               |               |               |               |               |               |               |             |             |               |               |               |               |               |               |                                                 |             |             |             |             |             |             |             |             |             |             |             |             |               |               |               |               |                                           |               |               |             |             |             |             |             |             |               |               |               |               |               |               |               |               |                          |               |               |               |               |               |               |               |               |               |               |               |               |               |               |               |               |                                      |               |               |               |               |               |               |               |               |               |               |               |               |               |               |               |               |                                              |             |             |             |             |             |             |             |             |             |             |            |            |               |               |               |               |                          |               |               |               |               |               |               |               |               |               |               |               |               |               |               |               |               |                                                 |               |               |               |               |               |               |               |               |               |               |               |               |               |               |               |               |                                              |             |             |             |             |             |             |             |             |             |             |               |               |               |               |               |               |                      |               |               |             |             |             |             |             |             |               |               |               |               |               |               |               |               |                                                 |               |               |               |               |               |               |               |               |             |             |               |               |               |               |               |               |                                        |             |             |             |             |             |             |             |             |             |             |               |               |               |               |               |               |                                           |               |               |             |             |             |             |             |             |               |               |               |               |               |               |               |               |                          |               |               |               |               |               |               |               |               |               |               |               |               |               |               |               |               |              |               |               |               |               |               |               |               |               |               |               |               |               |               |               |               |               |                                             |           |           |            |            |            |            |            |            |           |           |           |           |            |            |            |            |                          |               |               |               |               |               |               |               |               |               |               |               |               |               |               |               |               |                                                 |               |               |               |               |               |               |               |               |               |               |               |               |               |               |               |               |                                             |             |             |             |             |             |             |             |             |             |             |               |               |               |               |               |               |                      |            |            |            |            |            |            |            |            |            |            |            |            |            |              |              |              |                                                 |           |           |           |           |           |           |           |           |           |           |            |            |            |            |            |            |         |             |             |             |             |             |             |             |             |             |             |               |               |               |               |               |               |                      |           |           |           |           |           |           |           |           |           |           |           |           |            |            |            |  |
| Comorbidities, n (%)                            |                       |                       |                       |                       |                       |                       |                       |                       |                       |                       |                       |                       |                        |                        |                        |                        | Acquired immunodeficiency syndrome (AIDS)  | 11 (0.4%)     | 11 (0.4%)     | 10 (0.2%)     | 11 (0.3%)     | 11 (0.3%)     | 11 (0.3%)     | 11 (0.3%)     | 11 (0.3%)     | 19 (0.4%)     | 19 (0.4%)     | 27 (0.5%)     | 26 (0.4%)     | 64 (0.4%)     | 64 (0.4%)     | 64 (0.4%)     | 64 (0.4%)     | Alcohol abuse        | 148 (4.5%)    | 148 (4.5%)    | 87 (2.0%)     | 86 (2.0%)     | 86 (2.0%)     | 86 (2.0%)     | 86 (2.0%)     | 86 (2.0%)     | 106 (2.4%)    | 106 (2.4%)    | 205 (3.4%)    | 205 (3.4%)    | 591 (3.3%)    | 591 (3.3%)    | 591 (3.3%)    | 591 (3.3%)    | Anemia                                    | 811 (24.4%)   | 811 (24.4%)   | 795 (18.2%)   | 795 (18.2%)   | 795 (18.2%)   | 795 (18.2%)   | 795 (18.2%)   | 795 (18.2%)   | 701 (16.5%)   | 701 (16.5%)   | 686 (11.5%)   | 686 (11.5%)   | 2,562 (14.3%) | 2,562 (14.3%) | 2,562 (14.3%) | 2,562 (14.3%) | Bleeding                    | 66 (2.0%)     | 67 (2.1%)     | 17 (0.4%)     | 16 (0.4%)     | 16 (0.4%)     | 16 (0.4%)     | 16 (0.4%)     | 16 (0.4%)     | 65 (1.5%)     | 65 (1.5%)     | 81 (1.4%)     | 77 (1.3%)     | 261 (1.5%)    | 261 (1.5%)    | 261 (1.5%)    | 261 (1.5%)    | Central venous catheter    | 152 (4.6%)  | 137 (4.1%)  | 99 (2.3%)     | 99 (2.3%)     | 99 (2.3%)     | 99 (2.3%)     | 99 (2.3%)     | 99 (2.3%)     | 181 (4.2%)    | 181 (4.2%)    | 255 (4.3%)    | 229 (3.9%)    | 689 (3.9%)    | 689 (3.9%)    | 689 (3.9%)    | 689 (3.9%)    | Cerebrovascular disease (stroke/TIA) | 406 (12.4%)   | 406 (12.4%)   | 276 (6.3%)    | 276 (6.3%)    | 276 (6.3%)    | 276 (6.3%)    | 276 (6.3%)    | 276 (6.3%)    | 317 (7.3%)    | 317 (7.3%)    | 323 (5.5%)    | 323 (5.5%)    | 1,242 (6.9%)   | 1,242 (6.9%)   | 1,242 (6.9%)   | 1,242 (6.9%)   | Chronic obstructive pulmonary disease (COPD) | 876 (26.4%)   | 876 (26.4%)   | 888 (20.0%)   | 888 (20.0%)   | 888 (20.0%)   | 888 (20.0%)   | 888 (20.0%)   | 888 (20.0%)   | 598 (13.8%)   | 598 (13.8%)   | 398 (6.7%)    | 398 (6.7%)    | 2,155 (12.1%) | 2,155 (12.1%) | 2,155 (12.1%) | 2,155 (12.1%) | Coagulopathy                               | 38 (1.1%)     | 49 (1.5%)     | 38 (0.9%)     | 30 (0.7%)     | 30 (0.7%)     | 30 (0.7%)     | 30 (0.7%)     | 30 (0.7%)     | 56 (1.3%)     | 56 (1.3%)     | 51 (0.9%)     | 51 (0.9%)     | 221 (1.2%)    | 221 (1.2%)    | 221 (1.2%)    | 221 (1.2%)    | Congestive heart failure                     | 1,127 (34.0%) | 1,127 (34.0%) | 1,114 (25.0%) | 1,114 (25.0%) | 1,114 (25.0%) | 1,114 (25.0%) | 1,114 (25.0%) | 1,114 (25.0%) | 924 (21.2%)   | 924 (21.2%)   | 874 (14.7%)   | 874 (14.7%)   | 3,466 (19.4%)  | 3,466 (19.4%)  | 3,466 (19.4%)  | 3,466 (19.4%)  | Ischemic heart/coronary artery disease    | 217 (7.1%)    | 184 (5.5%)    | 541 (12.2%)   | 441 (10.2%)   | 441 (10.2%)   | 441 (10.2%)   | 441 (10.2%)   | 441 (10.2%)   | 152 (3.5%)    | 152 (3.5%)    | 25 (0.4%)     | 21 (0.4%)     | 508 (2.8%)    | 425 (2.4%)    | 508 (2.8%)    | 425 (2.4%)    | Dementia                 | 1,269 (39.4%) | 1,269 (39.4%) | 942 (21.6%)   | 942 (21.6%)   | 942 (21.6%)   | 942 (21.6%)   | 942 (21.6%)   | 942 (21.6%)   | 1,100 (25.0%) | 1,100 (25.0%) | 1,040 (17.6%) | 1,040 (17.6%) | 4,342 (24.3%) | 4,342 (24.3%) | 4,342 (24.3%) | 4,342 (24.3%) | Diabetes                                   | 708 (22.1%) | 708 (22.1%) | 1,113 (25.3%) | 1,113 (25.3%) | 1,113 (25.3%) | 1,113 (25.3%) | 1,113 (25.3%) | 1,113 (25.3%) | 978 (22.5%)   | 978 (22.5%)   | 1,031 (17.8%) | 1,031 (17.8%) | 3,271 (18.3%) | 3,271 (18.3%) | 3,271 (18.3%) | 3,271 (18.3%) | Disability                  | 170 (5.1%)    | 170 (5.1%)    | 436 (10.0%)   | 436 (10.0%)   | 436 (10.0%)   | 436 (10.0%)   | 436 (10.0%)   | 436 (10.0%)   | 323 (7.4%)    | 323 (7.4%)    | 371 (6.4%)    | 371 (6.4%)    | 1,669 (9.3%)  | 1,669 (9.3%)  | 1,669 (9.3%)  | 1,669 (9.3%)  | Fractures involving the lower extremities | 76 (2.3%)     | 76 (2.3%)     | 217 (5.0%)    | 217 (5.0%)    | 217 (5.0%)    | 217 (5.0%)    | 217 (5.0%)    | 217 (5.0%)    | 44 (1.0%)     | 44 (1.0%)     | 43 (0.8%)     | 43 (0.8%)     | 191 (1.1%)    | 191 (1.1%)    | 191 (1.1%)    | 191 (1.1%)    | Hemiplegia or paraplegia             | 2,150 (64.8%) | 2,150 (64.8%) | 1,747 (40.1%) | 1,668 (38.3%) | 1,668 (38.3%) | 1,668 (38.3%) | 1,668 (38.3%) | 1,668 (38.3%) | 2,120 (50.0%) | 2,120 (50.0%) | 1,907 (32.0%) | 1,907 (32.0%) | 7,875 (44.0%) | 7,875 (44.0%) | 7,875 (44.0%) | 7,875 (44.0%) | Hypertension                                 | 2,680 (80.8%) | 2,680 (80.8%) | 2,648 (79.6%) | 2,648 (79.6%) | 2,648 (79.6%) | 2,648 (79.6%) | 2,648 (79.6%) | 2,648 (79.6%) | 2,499 (58.9%) | 2,499 (58.9%) | 2,054 (34.3%) | 2,054 (34.3%) | 9,799 (54.8%) | 9,799 (54.8%) | 9,799 (54.8%) | 9,799 (54.8%) | Hypertension<br>inflammatory bowel syndrome | 38 (1.1%)     | 35 (1.1%)     | 32 (0.7%)     | 37 (0.8%)     | 37 (0.8%)     | 37 (0.8%)     | 37 (0.8%)     | 37 (0.8%)     | 29 (0.7%)     | 29 (0.7%)     | 80 (1.3%)     | 94 (1.6%)     | 179 (1.0%)    | 190 (1.1%)    | 190 (1.1%)    | 190 (1.1%)    | Liver disease                              | 235 (7.1%)    | 246 (7.4%)    | 154 (3.5%)    | 154 (3.5%)    | 154 (3.5%)    | 154 (3.5%)    | 154 (3.5%)    | 154 (3.5%)    | 267 (6.3%)    | 267 (6.3%)    | 361 (6.1%)    | 361 (6.1%)    | 998 (5.6%)    | 1,031 (5.8%)  | 1,031 (5.8%)  | 1,031 (5.8%)  | Malignancy (excluding non-melanoma skin cancer) | 50 (1.5%)   | 46 (1.4%)   | 21 (0.5%)   | 21 (0.5%)   | 21 (0.5%)   | 21 (0.5%)   | 21 (0.5%)   | 21 (0.5%)   | 62 (1.4%)  | 62 (1.4%)  | 216 (3.7%) | 216 (3.7%) | 200 (1.1%)   | 200 (1.1%)   | 200 (1.1%)   | 200 (1.1%)   | Obesity                                      | 859 (25.9%)   | 843 (25.4%)   | 565 (13.0%)   | 580 (13.3%)   | 580 (13.3%)   | 580 (13.3%)   | 580 (13.3%)   | 580 (13.3%)   | 859 (20.2%)   | 859 (20.2%)   | 1,267 (21.3%) | 1,267 (21.3%) | 3,549 (19.9%) | 3,549 (19.9%) | 3,549 (19.9%) | 3,549 (19.9%) | Peptic ulcer disease                            | 52 (1.6%)     | 46 (1.4%)     | 39 (0.9%)     | 39 (0.9%)     | 39 (0.9%)     | 39 (0.9%)     | 39 (0.9%)     | 39 (0.9%)     | 39 (0.9%)     | 39 (0.9%)     | 41 (0.7%)     | 41 (0.7%)     | 160 (0.9%)    | 154 (0.9%)    | 154 (0.9%)    |               |                          |               |               |               |               |               |               |               |               |               |               |               |               |               |               |               |               |                                           |               |               |               |               |               |               |               |               |               |               |               |               |               |               |               |               |                          |               |               |               |               |               |               |               |               |               |               |               |               |               |               |               |               |                                      |               |               |               |               |               |               |               |               |               |               |               |               |               |               |               |               |                                              |               |               |               |               |               |               |               |               |               |               |               |               |               |               |               |               |                                           |            |            |             |             |             |             |             |             |             |             |             |             |               |               |               |               |                                                 |               |               |               |               |               |               |               |               |               |               |               |               |               |               |               |               |                                              |               |               |               |               |               |               |               |               |               |               |               |               |               |               |               |               |                                             |               |               |             |             |             |             |             |             |               |               |               |               |               |               |               |               |                                            |               |               |               |               |               |               |               |               |             |             |               |               |               |               |               |               |                                                 |             |             |             |             |             |             |             |             |             |             |             |             |               |               |               |               |                                           |               |               |             |             |             |             |             |             |               |               |               |               |               |               |               |               |                          |               |               |               |               |               |               |               |               |               |               |               |               |               |               |               |               |                                      |               |               |               |               |               |               |               |               |               |               |               |               |               |               |               |               |                                              |             |             |             |             |             |             |             |             |             |             |            |            |               |               |               |               |                          |               |               |               |               |               |               |               |               |               |               |               |               |               |               |               |               |                                                 |               |               |               |               |               |               |               |               |               |               |               |               |               |               |               |               |                                              |             |             |             |             |             |             |             |             |             |             |               |               |               |               |               |               |                      |               |               |             |             |             |             |             |             |               |               |               |               |               |               |               |               |                                                 |               |               |               |               |               |               |               |               |             |             |               |               |               |               |               |               |                                        |             |             |             |             |             |             |             |             |             |             |               |               |               |               |               |               |                                           |               |               |             |             |             |             |             |             |               |               |               |               |               |               |               |               |                          |               |               |               |               |               |               |               |               |               |               |               |               |               |               |               |               |              |               |               |               |               |               |               |               |               |               |               |               |               |               |               |               |               |                                             |           |           |            |            |            |            |            |            |           |           |           |           |            |            |            |            |                          |               |               |               |               |               |               |               |               |               |               |               |               |               |               |               |               |                                                 |               |               |               |               |               |               |               |               |               |               |               |               |               |               |               |               |                                             |             |             |             |             |             |             |             |             |             |             |               |               |               |               |               |               |                      |            |            |            |            |            |            |            |            |            |            |            |            |            |              |              |              |                                                 |           |           |           |           |           |           |           |           |           |           |            |            |            |            |            |            |         |             |             |             |             |             |             |             |             |             |             |               |               |               |               |               |               |                      |           |           |           |           |           |           |           |           |           |           |           |           |            |            |            |  |
| Acquired immunodeficiency syndrome (AIDS)       | 11 (0.4%)             | 11 (0.4%)             | 10 (0.2%)             | 11 (0.3%)             | 11 (0.3%)             | 11 (0.3%)             | 11 (0.3%)             | 11 (0.3%)             | 19 (0.4%)             | 19 (0.4%)             | 27 (0.5%)             | 26 (0.4%)             | 64 (0.4%)              | 64 (0.4%)              | 64 (0.4%)              | 64 (0.4%)              |                                            |               |               |               |               |               |               |               |               |               |               |               |               |               |               |               |               |                      |               |               |               |               |               |               |               |               |               |               |               |               |               |               |               |               |                                           |               |               |               |               |               |               |               |               |               |               |               |               |               |               |               |               |                             |               |               |               |               |               |               |               |               |               |               |               |               |               |               |               |               |                            |             |             |               |               |               |               |               |               |               |               |               |               |               |               |               |               |                                      |               |               |               |               |               |               |               |               |               |               |               |               |                |                |                |                |                                              |               |               |               |               |               |               |               |               |               |               |               |               |               |               |               |               |                                            |               |               |               |               |               |               |               |               |               |               |               |               |               |               |               |               |                                              |               |               |               |               |               |               |               |               |               |               |               |               |                |                |                |                |                                           |               |               |               |               |               |               |               |               |               |               |               |               |               |               |               |               |                          |               |               |               |               |               |               |               |               |               |               |               |               |               |               |               |               |                                            |             |             |               |               |               |               |               |               |               |               |               |               |               |               |               |               |                             |               |               |               |               |               |               |               |               |               |               |               |               |               |               |               |               |                                           |               |               |               |               |               |               |               |               |               |               |               |               |               |               |               |               |                                      |               |               |               |               |               |               |               |               |               |               |               |               |               |               |               |               |                                              |               |               |               |               |               |               |               |               |               |               |               |               |               |               |               |               |                                             |               |               |               |               |               |               |               |               |               |               |               |               |               |               |               |               |                                            |               |               |               |               |               |               |               |               |               |               |               |               |               |               |               |               |                                                 |             |             |             |             |             |             |             |             |            |            |            |            |              |              |              |              |                                              |               |               |               |               |               |               |               |               |               |               |               |               |               |               |               |               |                                                 |               |               |               |               |               |               |               |               |               |               |               |               |               |               |               |               |                          |               |               |               |               |               |               |               |               |               |               |               |               |               |               |               |               |                                           |               |               |               |               |               |               |               |               |               |               |               |               |               |               |               |               |                          |               |               |               |               |               |               |               |               |               |               |               |               |               |               |               |               |                                      |               |               |               |               |               |               |               |               |               |               |               |               |               |               |               |               |                                              |               |               |               |               |               |               |               |               |               |               |               |               |               |               |               |               |                                           |            |            |             |             |             |             |             |             |             |             |             |             |               |               |               |               |                                                 |               |               |               |               |               |               |               |               |               |               |               |               |               |               |               |               |                                              |               |               |               |               |               |               |               |               |               |               |               |               |               |               |               |               |                                             |               |               |             |             |             |             |             |             |               |               |               |               |               |               |               |               |                                            |               |               |               |               |               |               |               |               |             |             |               |               |               |               |               |               |                                                 |             |             |             |             |             |             |             |             |             |             |             |             |               |               |               |               |                                           |               |               |             |             |             |             |             |             |               |               |               |               |               |               |               |               |                          |               |               |               |               |               |               |               |               |               |               |               |               |               |               |               |               |                                      |               |               |               |               |               |               |               |               |               |               |               |               |               |               |               |               |                                              |             |             |             |             |             |             |             |             |             |             |            |            |               |               |               |               |                          |               |               |               |               |               |               |               |               |               |               |               |               |               |               |               |               |                                                 |               |               |               |               |               |               |               |               |               |               |               |               |               |               |               |               |                                              |             |             |             |             |             |             |             |             |             |             |               |               |               |               |               |               |                      |               |               |             |             |             |             |             |             |               |               |               |               |               |               |               |               |                                                 |               |               |               |               |               |               |               |               |             |             |               |               |               |               |               |               |                                        |             |             |             |             |             |             |             |             |             |             |               |               |               |               |               |               |                                           |               |               |             |             |             |             |             |             |               |               |               |               |               |               |               |               |                          |               |               |               |               |               |               |               |               |               |               |               |               |               |               |               |               |              |               |               |               |               |               |               |               |               |               |               |               |               |               |               |               |               |                                             |           |           |            |            |            |            |            |            |           |           |           |           |            |            |            |            |                          |               |               |               |               |               |               |               |               |               |               |               |               |               |               |               |               |                                                 |               |               |               |               |               |               |               |               |               |               |               |               |               |               |               |               |                                             |             |             |             |             |             |             |             |             |             |             |               |               |               |               |               |               |                      |            |            |            |            |            |            |            |            |            |            |            |            |            |              |              |              |                                                 |           |           |           |           |           |           |           |           |           |           |            |            |            |            |            |            |         |             |             |             |             |             |             |             |             |             |             |               |               |               |               |               |               |                      |           |           |           |           |           |           |           |           |           |           |           |           |            |            |            |  |
| Alcohol abuse                                   | 148 (4.5%)            | 148 (4.5%)            | 87 (2.0%)             | 86 (2.0%)             | 86 (2.0%)             | 86 (2.0%)             | 86 (2.0%)             | 86 (2.0%)             | 106 (2.4%)            | 106 (2.4%)            | 205 (3.4%)            | 205 (3.4%)            | 591 (3.3%)             | 591 (3.3%)             | 591 (3.3%)             | 591 (3.3%)             |                                            |               |               |               |               |               |               |               |               |               |               |               |               |               |               |               |               |                      |               |               |               |               |               |               |               |               |               |               |               |               |               |               |               |               |                                           |               |               |               |               |               |               |               |               |               |               |               |               |               |               |               |               |                             |               |               |               |               |               |               |               |               |               |               |               |               |               |               |               |               |                            |             |             |               |               |               |               |               |               |               |               |               |               |               |               |               |               |                                      |               |               |               |               |               |               |               |               |               |               |               |               |                |                |                |                |                                              |               |               |               |               |               |               |               |               |               |               |               |               |               |               |               |               |                                            |               |               |               |               |               |               |               |               |               |               |               |               |               |               |               |               |                                              |               |               |               |               |               |               |               |               |               |               |               |               |                |                |                |                |                                           |               |               |               |               |               |               |               |               |               |               |               |               |               |               |               |               |                          |               |               |               |               |               |               |               |               |               |               |               |               |               |               |               |               |                                            |             |             |               |               |               |               |               |               |               |               |               |               |               |               |               |               |                             |               |               |               |               |               |               |               |               |               |               |               |               |               |               |               |               |                                           |               |               |               |               |               |               |               |               |               |               |               |               |               |               |               |               |                                      |               |               |               |               |               |               |               |               |               |               |               |               |               |               |               |               |                                              |               |               |               |               |               |               |               |               |               |               |               |               |               |               |               |               |                                             |               |               |               |               |               |               |               |               |               |               |               |               |               |               |               |               |                                            |               |               |               |               |               |               |               |               |               |               |               |               |               |               |               |               |                                                 |             |             |             |             |             |             |             |             |            |            |            |            |              |              |              |              |                                              |               |               |               |               |               |               |               |               |               |               |               |               |               |               |               |               |                                                 |               |               |               |               |               |               |               |               |               |               |               |               |               |               |               |               |                          |               |               |               |               |               |               |               |               |               |               |               |               |               |               |               |               |                                           |               |               |               |               |               |               |               |               |               |               |               |               |               |               |               |               |                          |               |               |               |               |               |               |               |               |               |               |               |               |               |               |               |               |                                      |               |               |               |               |               |               |               |               |               |               |               |               |               |               |               |               |                                              |               |               |               |               |               |               |               |               |               |               |               |               |               |               |               |               |                                           |            |            |             |             |             |             |             |             |             |             |             |             |               |               |               |               |                                                 |               |               |               |               |               |               |               |               |               |               |               |               |               |               |               |               |                                              |               |               |               |               |               |               |               |               |               |               |               |               |               |               |               |               |                                             |               |               |             |             |             |             |             |             |               |               |               |               |               |               |               |               |                                            |               |               |               |               |               |               |               |               |             |             |               |               |               |               |               |               |                                                 |             |             |             |             |             |             |             |             |             |             |             |             |               |               |               |               |                                           |               |               |             |             |             |             |             |             |               |               |               |               |               |               |               |               |                          |               |               |               |               |               |               |               |               |               |               |               |               |               |               |               |               |                                      |               |               |               |               |               |               |               |               |               |               |               |               |               |               |               |               |                                              |             |             |             |             |             |             |             |             |             |             |            |            |               |               |               |               |                          |               |               |               |               |               |               |               |               |               |               |               |               |               |               |               |               |                                                 |               |               |               |               |               |               |               |               |               |               |               |               |               |               |               |               |                                              |             |             |             |             |             |             |             |             |             |             |               |               |               |               |               |               |                      |               |               |             |             |             |             |             |             |               |               |               |               |               |               |               |               |                                                 |               |               |               |               |               |               |               |               |             |             |               |               |               |               |               |               |                                        |             |             |             |             |             |             |             |             |             |             |               |               |               |               |               |               |                                           |               |               |             |             |             |             |             |             |               |               |               |               |               |               |               |               |                          |               |               |               |               |               |               |               |               |               |               |               |               |               |               |               |               |              |               |               |               |               |               |               |               |               |               |               |               |               |               |               |               |               |                                             |           |           |            |            |            |            |            |            |           |           |           |           |            |            |            |            |                          |               |               |               |               |               |               |               |               |               |               |               |               |               |               |               |               |                                                 |               |               |               |               |               |               |               |               |               |               |               |               |               |               |               |               |                                             |             |             |             |             |             |             |             |             |             |             |               |               |               |               |               |               |                      |            |            |            |            |            |            |            |            |            |            |            |            |            |              |              |              |                                                 |           |           |           |           |           |           |           |           |           |           |            |            |            |            |            |            |         |             |             |             |             |             |             |             |             |             |             |               |               |               |               |               |               |                      |           |           |           |           |           |           |           |           |           |           |           |           |            |            |            |  |
| Anemia                                          | 811 (24.4%)           | 811 (24.4%)           | 795 (18.2%)           | 795 (18.2%)           | 795 (18.2%)           | 795 (18.2%)           | 795 (18.2%)           | 795 (18.2%)           | 701 (16.5%)           | 701 (16.5%)           | 686 (11.5%)           | 686 (11.5%)           | 2,562 (14.3%)          | 2,562 (14.3%)          | 2,562 (14.3%)          | 2,562 (14.3%)          |                                            |               |               |               |               |               |               |               |               |               |               |               |               |               |               |               |               |                      |               |               |               |               |               |               |               |               |               |               |               |               |               |               |               |               |                                           |               |               |               |               |               |               |               |               |               |               |               |               |               |               |               |               |                             |               |               |               |               |               |               |               |               |               |               |               |               |               |               |               |               |                            |             |             |               |               |               |               |               |               |               |               |               |               |               |               |               |               |                                      |               |               |               |               |               |               |               |               |               |               |               |               |                |                |                |                |                                              |               |               |               |               |               |               |               |               |               |               |               |               |               |               |               |               |                                            |               |               |               |               |               |               |               |               |               |               |               |               |               |               |               |               |                                              |               |               |               |               |               |               |               |               |               |               |               |               |                |                |                |                |                                           |               |               |               |               |               |               |               |               |               |               |               |               |               |               |               |               |                          |               |               |               |               |               |               |               |               |               |               |               |               |               |               |               |               |                                            |             |             |               |               |               |               |               |               |               |               |               |               |               |               |               |               |                             |               |               |               |               |               |               |               |               |               |               |               |               |               |               |               |               |                                           |               |               |               |               |               |               |               |               |               |               |               |               |               |               |               |               |                                      |               |               |               |               |               |               |               |               |               |               |               |               |               |               |               |               |                                              |               |               |               |               |               |               |               |               |               |               |               |               |               |               |               |               |                                             |               |               |               |               |               |               |               |               |               |               |               |               |               |               |               |               |                                            |               |               |               |               |               |               |               |               |               |               |               |               |               |               |               |               |                                                 |             |             |             |             |             |             |             |             |            |            |            |            |              |              |              |              |                                              |               |               |               |               |               |               |               |               |               |               |               |               |               |               |               |               |                                                 |               |               |               |               |               |               |               |               |               |               |               |               |               |               |               |               |                          |               |               |               |               |               |               |               |               |               |               |               |               |               |               |               |               |                                           |               |               |               |               |               |               |               |               |               |               |               |               |               |               |               |               |                          |               |               |               |               |               |               |               |               |               |               |               |               |               |               |               |               |                                      |               |               |               |               |               |               |               |               |               |               |               |               |               |               |               |               |                                              |               |               |               |               |               |               |               |               |               |               |               |               |               |               |               |               |                                           |            |            |             |             |             |             |             |             |             |             |             |             |               |               |               |               |                                                 |               |               |               |               |               |               |               |               |               |               |               |               |               |               |               |               |                                              |               |               |               |               |               |               |               |               |               |               |               |               |               |               |               |               |                                             |               |               |             |             |             |             |             |             |               |               |               |               |               |               |               |               |                                            |               |               |               |               |               |               |               |               |             |             |               |               |               |               |               |               |                                                 |             |             |             |             |             |             |             |             |             |             |             |             |               |               |               |               |                                           |               |               |             |             |             |             |             |             |               |               |               |               |               |               |               |               |                          |               |               |               |               |               |               |               |               |               |               |               |               |               |               |               |               |                                      |               |               |               |               |               |               |               |               |               |               |               |               |               |               |               |               |                                              |             |             |             |             |             |             |             |             |             |             |            |            |               |               |               |               |                          |               |               |               |               |               |               |               |               |               |               |               |               |               |               |               |               |                                                 |               |               |               |               |               |               |               |               |               |               |               |               |               |               |               |               |                                              |             |             |             |             |             |             |             |             |             |             |               |               |               |               |               |               |                      |               |               |             |             |             |             |             |             |               |               |               |               |               |               |               |               |                                                 |               |               |               |               |               |               |               |               |             |             |               |               |               |               |               |               |                                        |             |             |             |             |             |             |             |             |             |             |               |               |               |               |               |               |                                           |               |               |             |             |             |             |             |             |               |               |               |               |               |               |               |               |                          |               |               |               |               |               |               |               |               |               |               |               |               |               |               |               |               |              |               |               |               |               |               |               |               |               |               |               |               |               |               |               |               |               |                                             |           |           |            |            |            |            |            |            |           |           |           |           |            |            |            |            |                          |               |               |               |               |               |               |               |               |               |               |               |               |               |               |               |               |                                                 |               |               |               |               |               |               |               |               |               |               |               |               |               |               |               |               |                                             |             |             |             |             |             |             |             |             |             |             |               |               |               |               |               |               |                      |            |            |            |            |            |            |            |            |            |            |            |            |            |              |              |              |                                                 |           |           |           |           |           |           |           |           |           |           |            |            |            |            |            |            |         |             |             |             |             |             |             |             |             |             |             |               |               |               |               |               |               |                      |           |           |           |           |           |           |           |           |           |           |           |           |            |            |            |  |
| Bleeding                                        | 66 (2.0%)             | 67 (2.1%)             | 17 (0.4%)             | 16 (0.4%)             | 16 (0.4%)             | 16 (0.4%)             | 16 (0.4%)             | 16 (0.4%)             | 65 (1.5%)             | 65 (1.5%)             | 81 (1.4%)             | 77 (1.3%)             | 261 (1.5%)             | 261 (1.5%)             | 261 (1.5%)             | 261 (1.5%)             |                                            |               |               |               |               |               |               |               |               |               |               |               |               |               |               |               |               |                      |               |               |               |               |               |               |               |               |               |               |               |               |               |               |               |               |                                           |               |               |               |               |               |               |               |               |               |               |               |               |               |               |               |               |                             |               |               |               |               |               |               |               |               |               |               |               |               |               |               |               |               |                            |             |             |               |               |               |               |               |               |               |               |               |               |               |               |               |               |                                      |               |               |               |               |               |               |               |               |               |               |               |               |                |                |                |                |                                              |               |               |               |               |               |               |               |               |               |               |               |               |               |               |               |               |                                            |               |               |               |               |               |               |               |               |               |               |               |               |               |               |               |               |                                              |               |               |               |               |               |               |               |               |               |               |               |               |                |                |                |                |                                           |               |               |               |               |               |               |               |               |               |               |               |               |               |               |               |               |                          |               |               |               |               |               |               |               |               |               |               |               |               |               |               |               |               |                                            |             |             |               |               |               |               |               |               |               |               |               |               |               |               |               |               |                             |               |               |               |               |               |               |               |               |               |               |               |               |               |               |               |               |                                           |               |               |               |               |               |               |               |               |               |               |               |               |               |               |               |               |                                      |               |               |               |               |               |               |               |               |               |               |               |               |               |               |               |               |                                              |               |               |               |               |               |               |               |               |               |               |               |               |               |               |               |               |                                             |               |               |               |               |               |               |               |               |               |               |               |               |               |               |               |               |                                            |               |               |               |               |               |               |               |               |               |               |               |               |               |               |               |               |                                                 |             |             |             |             |             |             |             |             |            |            |            |            |              |              |              |              |                                              |               |               |               |               |               |               |               |               |               |               |               |               |               |               |               |               |                                                 |               |               |               |               |               |               |               |               |               |               |               |               |               |               |               |               |                          |               |               |               |               |               |               |               |               |               |               |               |               |               |               |               |               |                                           |               |               |               |               |               |               |               |               |               |               |               |               |               |               |               |               |                          |               |               |               |               |               |               |               |               |               |               |               |               |               |               |               |               |                                      |               |               |               |               |               |               |               |               |               |               |               |               |               |               |               |               |                                              |               |               |               |               |               |               |               |               |               |               |               |               |               |               |               |               |                                           |            |            |             |             |             |             |             |             |             |             |             |             |               |               |               |               |                                                 |               |               |               |               |               |               |               |               |               |               |               |               |               |               |               |               |                                              |               |               |               |               |               |               |               |               |               |               |               |               |               |               |               |               |                                             |               |               |             |             |             |             |             |             |               |               |               |               |               |               |               |               |                                            |               |               |               |               |               |               |               |               |             |             |               |               |               |               |               |               |                                                 |             |             |             |             |             |             |             |             |             |             |             |             |               |               |               |               |                                           |               |               |             |             |             |             |             |             |               |               |               |               |               |               |               |               |                          |               |               |               |               |               |               |               |               |               |               |               |               |               |               |               |               |                                      |               |               |               |               |               |               |               |               |               |               |               |               |               |               |               |               |                                              |             |             |             |             |             |             |             |             |             |             |            |            |               |               |               |               |                          |               |               |               |               |               |               |               |               |               |               |               |               |               |               |               |               |                                                 |               |               |               |               |               |               |               |               |               |               |               |               |               |               |               |               |                                              |             |             |             |             |             |             |             |             |             |             |               |               |               |               |               |               |                      |               |               |             |             |             |             |             |             |               |               |               |               |               |               |               |               |                                                 |               |               |               |               |               |               |               |               |             |             |               |               |               |               |               |               |                                        |             |             |             |             |             |             |             |             |             |             |               |               |               |               |               |               |                                           |               |               |             |             |             |             |             |             |               |               |               |               |               |               |               |               |                          |               |               |               |               |               |               |               |               |               |               |               |               |               |               |               |               |              |               |               |               |               |               |               |               |               |               |               |               |               |               |               |               |               |                                             |           |           |            |            |            |            |            |            |           |           |           |           |            |            |            |            |                          |               |               |               |               |               |               |               |               |               |               |               |               |               |               |               |               |                                                 |               |               |               |               |               |               |               |               |               |               |               |               |               |               |               |               |                                             |             |             |             |             |             |             |             |             |             |             |               |               |               |               |               |               |                      |            |            |            |            |            |            |            |            |            |            |            |            |            |              |              |              |                                                 |           |           |           |           |           |           |           |           |           |           |            |            |            |            |            |            |         |             |             |             |             |             |             |             |             |             |             |               |               |               |               |               |               |                      |           |           |           |           |           |           |           |           |           |           |           |           |            |            |            |  |
| Central venous catheter                         | 152 (4.6%)            | 137 (4.1%)            | 99 (2.3%)             | 99 (2.3%)             | 99 (2.3%)             | 99 (2.3%)             | 99 (2.3%)             | 99 (2.3%)             | 181 (4.2%)            | 181 (4.2%)            | 255 (4.3%)            | 229 (3.9%)            | 689 (3.9%)             | 689 (3.9%)             | 689 (3.9%)             | 689 (3.9%)             |                                            |               |               |               |               |               |               |               |               |               |               |               |               |               |               |               |               |                      |               |               |               |               |               |               |               |               |               |               |               |               |               |               |               |               |                                           |               |               |               |               |               |               |               |               |               |               |               |               |               |               |               |               |                             |               |               |               |               |               |               |               |               |               |               |               |               |               |               |               |               |                            |             |             |               |               |               |               |               |               |               |               |               |               |               |               |               |               |                                      |               |               |               |               |               |               |               |               |               |               |               |               |                |                |                |                |                                              |               |               |               |               |               |               |               |               |               |               |               |               |               |               |               |               |                                            |               |               |               |               |               |               |               |               |               |               |               |               |               |               |               |               |                                              |               |               |               |               |               |               |               |               |               |               |               |               |                |                |                |                |                                           |               |               |               |               |               |               |               |               |               |               |               |               |               |               |               |               |                          |               |               |               |               |               |               |               |               |               |               |               |               |               |               |               |               |                                            |             |             |               |               |               |               |               |               |               |               |               |               |               |               |               |               |                             |               |               |               |               |               |               |               |               |               |               |               |               |               |               |               |               |                                           |               |               |               |               |               |               |               |               |               |               |               |               |               |               |               |               |                                      |               |               |               |               |               |               |               |               |               |               |               |               |               |               |               |               |                                              |               |               |               |               |               |               |               |               |               |               |               |               |               |               |               |               |                                             |               |               |               |               |               |               |               |               |               |               |               |               |               |               |               |               |                                            |               |               |               |               |               |               |               |               |               |               |               |               |               |               |               |               |                                                 |             |             |             |             |             |             |             |             |            |            |            |            |              |              |              |              |                                              |               |               |               |               |               |               |               |               |               |               |               |               |               |               |               |               |                                                 |               |               |               |               |               |               |               |               |               |               |               |               |               |               |               |               |                          |               |               |               |               |               |               |               |               |               |               |               |               |               |               |               |               |                                           |               |               |               |               |               |               |               |               |               |               |               |               |               |               |               |               |                          |               |               |               |               |               |               |               |               |               |               |               |               |               |               |               |               |                                      |               |               |               |               |               |               |               |               |               |               |               |               |               |               |               |               |                                              |               |               |               |               |               |               |               |               |               |               |               |               |               |               |               |               |                                           |            |            |             |             |             |             |             |             |             |             |             |             |               |               |               |               |                                                 |               |               |               |               |               |               |               |               |               |               |               |               |               |               |               |               |                                              |               |               |               |               |               |               |               |               |               |               |               |               |               |               |               |               |                                             |               |               |             |             |             |             |             |             |               |               |               |               |               |               |               |               |                                            |               |               |               |               |               |               |               |               |             |             |               |               |               |               |               |               |                                                 |             |             |             |             |             |             |             |             |             |             |             |             |               |               |               |               |                                           |               |               |             |             |             |             |             |             |               |               |               |               |               |               |               |               |                          |               |               |               |               |               |               |               |               |               |               |               |               |               |               |               |               |                                      |               |               |               |               |               |               |               |               |               |               |               |               |               |               |               |               |                                              |             |             |             |             |             |             |             |             |             |             |            |            |               |               |               |               |                          |               |               |               |               |               |               |               |               |               |               |               |               |               |               |               |               |                                                 |               |               |               |               |               |               |               |               |               |               |               |               |               |               |               |               |                                              |             |             |             |             |             |             |             |             |             |             |               |               |               |               |               |               |                      |               |               |             |             |             |             |             |             |               |               |               |               |               |               |               |               |                                                 |               |               |               |               |               |               |               |               |             |             |               |               |               |               |               |               |                                        |             |             |             |             |             |             |             |             |             |             |               |               |               |               |               |               |                                           |               |               |             |             |             |             |             |             |               |               |               |               |               |               |               |               |                          |               |               |               |               |               |               |               |               |               |               |               |               |               |               |               |               |              |               |               |               |               |               |               |               |               |               |               |               |               |               |               |               |               |                                             |           |           |            |            |            |            |            |            |           |           |           |           |            |            |            |            |                          |               |               |               |               |               |               |               |               |               |               |               |               |               |               |               |               |                                                 |               |               |               |               |               |               |               |               |               |               |               |               |               |               |               |               |                                             |             |             |             |             |             |             |             |             |             |             |               |               |               |               |               |               |                      |            |            |            |            |            |            |            |            |            |            |            |            |            |              |              |              |                                                 |           |           |           |           |           |           |           |           |           |           |            |            |            |            |            |            |         |             |             |             |             |             |             |             |             |             |             |               |               |               |               |               |               |                      |           |           |           |           |           |           |           |           |           |           |           |           |            |            |            |  |
| Cerebrovascular disease (stroke/TIA)            | 406 (12.4%)           | 406 (12.4%)           | 276 (6.3%)            | 276 (6.3%)            | 276 (6.3%)            | 276 (6.3%)            | 276 (6.3%)            | 276 (6.3%)            | 317 (7.3%)            | 317 (7.3%)            | 323 (5.5%)            | 323 (5.5%)            | 1,242 (6.9%)           | 1,242 (6.9%)           | 1,242 (6.9%)           | 1,242 (6.9%)           |                                            |               |               |               |               |               |               |               |               |               |               |               |               |               |               |               |               |                      |               |               |               |               |               |               |               |               |               |               |               |               |               |               |               |               |                                           |               |               |               |               |               |               |               |               |               |               |               |               |               |               |               |               |                             |               |               |               |               |               |               |               |               |               |               |               |               |               |               |               |               |                            |             |             |               |               |               |               |               |               |               |               |               |               |               |               |               |               |                                      |               |               |               |               |               |               |               |               |               |               |               |               |                |                |                |                |                                              |               |               |               |               |               |               |               |               |               |               |               |               |               |               |               |               |                                            |               |               |               |               |               |               |               |               |               |               |               |               |               |               |               |               |                                              |               |               |               |               |               |               |               |               |               |               |               |               |                |                |                |                |                                           |               |               |               |               |               |               |               |               |               |               |               |               |               |               |               |               |                          |               |               |               |               |               |               |               |               |               |               |               |               |               |               |               |               |                                            |             |             |               |               |               |               |               |               |               |               |               |               |               |               |               |               |                             |               |               |               |               |               |               |               |               |               |               |               |               |               |               |               |               |                                           |               |               |               |               |               |               |               |               |               |               |               |               |               |               |               |               |                                      |               |               |               |               |               |               |               |               |               |               |               |               |               |               |               |               |                                              |               |               |               |               |               |               |               |               |               |               |               |               |               |               |               |               |                                             |               |               |               |               |               |               |               |               |               |               |               |               |               |               |               |               |                                            |               |               |               |               |               |               |               |               |               |               |               |               |               |               |               |               |                                                 |             |             |             |             |             |             |             |             |            |            |            |            |              |              |              |              |                                              |               |               |               |               |               |               |               |               |               |               |               |               |               |               |               |               |                                                 |               |               |               |               |               |               |               |               |               |               |               |               |               |               |               |               |                          |               |               |               |               |               |               |               |               |               |               |               |               |               |               |               |               |                                           |               |               |               |               |               |               |               |               |               |               |               |               |               |               |               |               |                          |               |               |               |               |               |               |               |               |               |               |               |               |               |               |               |               |                                      |               |               |               |               |               |               |               |               |               |               |               |               |               |               |               |               |                                              |               |               |               |               |               |               |               |               |               |               |               |               |               |               |               |               |                                           |            |            |             |             |             |             |             |             |             |             |             |             |               |               |               |               |                                                 |               |               |               |               |               |               |               |               |               |               |               |               |               |               |               |               |                                              |               |               |               |               |               |               |               |               |               |               |               |               |               |               |               |               |                                             |               |               |             |             |             |             |             |             |               |               |               |               |               |               |               |               |                                            |               |               |               |               |               |               |               |               |             |             |               |               |               |               |               |               |                                                 |             |             |             |             |             |             |             |             |             |             |             |             |               |               |               |               |                                           |               |               |             |             |             |             |             |             |               |               |               |               |               |               |               |               |                          |               |               |               |               |               |               |               |               |               |               |               |               |               |               |               |               |                                      |               |               |               |               |               |               |               |               |               |               |               |               |               |               |               |               |                                              |             |             |             |             |             |             |             |             |             |             |            |            |               |               |               |               |                          |               |               |               |               |               |               |               |               |               |               |               |               |               |               |               |               |                                                 |               |               |               |               |               |               |               |               |               |               |               |               |               |               |               |               |                                              |             |             |             |             |             |             |             |             |             |             |               |               |               |               |               |               |                      |               |               |             |             |             |             |             |             |               |               |               |               |               |               |               |               |                                                 |               |               |               |               |               |               |               |               |             |             |               |               |               |               |               |               |                                        |             |             |             |             |             |             |             |             |             |             |               |               |               |               |               |               |                                           |               |               |             |             |             |             |             |             |               |               |               |               |               |               |               |               |                          |               |               |               |               |               |               |               |               |               |               |               |               |               |               |               |               |              |               |               |               |               |               |               |               |               |               |               |               |               |               |               |               |               |                                             |           |           |            |            |            |            |            |            |           |           |           |           |            |            |            |            |                          |               |               |               |               |               |               |               |               |               |               |               |               |               |               |               |               |                                                 |               |               |               |               |               |               |               |               |               |               |               |               |               |               |               |               |                                             |             |             |             |             |             |             |             |             |             |             |               |               |               |               |               |               |                      |            |            |            |            |            |            |            |            |            |            |            |            |            |              |              |              |                                                 |           |           |           |           |           |           |           |           |           |           |            |            |            |            |            |            |         |             |             |             |             |             |             |             |             |             |             |               |               |               |               |               |               |                      |           |           |           |           |           |           |           |           |           |           |           |           |            |            |            |  |
| Chronic obstructive pulmonary disease (COPD)    | 876 (26.4%)           | 876 (26.4%)           | 888 (20.0%)           | 888 (20.0%)           | 888 (20.0%)           | 888 (20.0%)           | 888 (20.0%)           | 888 (20.0%)           | 598 (13.8%)           | 598 (13.8%)           | 398 (6.7%)            | 398 (6.7%)            | 2,155 (12.1%)          | 2,155 (12.1%)          | 2,155 (12.1%)          | 2,155 (12.1%)          |                                            |               |               |               |               |               |               |               |               |               |               |               |               |               |               |               |               |                      |               |               |               |               |               |               |               |               |               |               |               |               |               |               |               |               |                                           |               |               |               |               |               |               |               |               |               |               |               |               |               |               |               |               |                             |               |               |               |               |               |               |               |               |               |               |               |               |               |               |               |               |                            |             |             |               |               |               |               |               |               |               |               |               |               |               |               |               |               |                                      |               |               |               |               |               |               |               |               |               |               |               |               |                |                |                |                |                                              |               |               |               |               |               |               |               |               |               |               |               |               |               |               |               |               |                                            |               |               |               |               |               |               |               |               |               |               |               |               |               |               |               |               |                                              |               |               |               |               |               |               |               |               |               |               |               |               |                |                |                |                |                                           |               |               |               |               |               |               |               |               |               |               |               |               |               |               |               |               |                          |               |               |               |               |               |               |               |               |               |               |               |               |               |               |               |               |                                            |             |             |               |               |               |               |               |               |               |               |               |               |               |               |               |               |                             |               |               |               |               |               |               |               |               |               |               |               |               |               |               |               |               |                                           |               |               |               |               |               |               |               |               |               |               |               |               |               |               |               |               |                                      |               |               |               |               |               |               |               |               |               |               |               |               |               |               |               |               |                                              |               |               |               |               |               |               |               |               |               |               |               |               |               |               |               |               |                                             |               |               |               |               |               |               |               |               |               |               |               |               |               |               |               |               |                                            |               |               |               |               |               |               |               |               |               |               |               |               |               |               |               |               |                                                 |             |             |             |             |             |             |             |             |            |            |            |            |              |              |              |              |                                              |               |               |               |               |               |               |               |               |               |               |               |               |               |               |               |               |                                                 |               |               |               |               |               |               |               |               |               |               |               |               |               |               |               |               |                          |               |               |               |               |               |               |               |               |               |               |               |               |               |               |               |               |                                           |               |               |               |               |               |               |               |               |               |               |               |               |               |               |               |               |                          |               |               |               |               |               |               |               |               |               |               |               |               |               |               |               |               |                                      |               |               |               |               |               |               |               |               |               |               |               |               |               |               |               |               |                                              |               |               |               |               |               |               |               |               |               |               |               |               |               |               |               |               |                                           |            |            |             |             |             |             |             |             |             |             |             |             |               |               |               |               |                                                 |               |               |               |               |               |               |               |               |               |               |               |               |               |               |               |               |                                              |               |               |               |               |               |               |               |               |               |               |               |               |               |               |               |               |                                             |               |               |             |             |             |             |             |             |               |               |               |               |               |               |               |               |                                            |               |               |               |               |               |               |               |               |             |             |               |               |               |               |               |               |                                                 |             |             |             |             |             |             |             |             |             |             |             |             |               |               |               |               |                                           |               |               |             |             |             |             |             |             |               |               |               |               |               |               |               |               |                          |               |               |               |               |               |               |               |               |               |               |               |               |               |               |               |               |                                      |               |               |               |               |               |               |               |               |               |               |               |               |               |               |               |               |                                              |             |             |             |             |             |             |             |             |             |             |            |            |               |               |               |               |                          |               |               |               |               |               |               |               |               |               |               |               |               |               |               |               |               |                                                 |               |               |               |               |               |               |               |               |               |               |               |               |               |               |               |               |                                              |             |             |             |             |             |             |             |             |             |             |               |               |               |               |               |               |                      |               |               |             |             |             |             |             |             |               |               |               |               |               |               |               |               |                                                 |               |               |               |               |               |               |               |               |             |             |               |               |               |               |               |               |                                        |             |             |             |             |             |             |             |             |             |             |               |               |               |               |               |               |                                           |               |               |             |             |             |             |             |             |               |               |               |               |               |               |               |               |                          |               |               |               |               |               |               |               |               |               |               |               |               |               |               |               |               |              |               |               |               |               |               |               |               |               |               |               |               |               |               |               |               |               |                                             |           |           |            |            |            |            |            |            |           |           |           |           |            |            |            |            |                          |               |               |               |               |               |               |               |               |               |               |               |               |               |               |               |               |                                                 |               |               |               |               |               |               |               |               |               |               |               |               |               |               |               |               |                                             |             |             |             |             |             |             |             |             |             |             |               |               |               |               |               |               |                      |            |            |            |            |            |            |            |            |            |            |            |            |            |              |              |              |                                                 |           |           |           |           |           |           |           |           |           |           |            |            |            |            |            |            |         |             |             |             |             |             |             |             |             |             |             |               |               |               |               |               |               |                      |           |           |           |           |           |           |           |           |           |           |           |           |            |            |            |  |
| Coagulopathy                                    | 38 (1.1%)             | 49 (1.5%)             | 38 (0.9%)             | 30 (0.7%)             | 30 (0.7%)             | 30 (0.7%)             | 30 (0.7%)             | 30 (0.7%)             | 56 (1.3%)             | 56 (1.3%)             | 51 (0.9%)             | 51 (0.9%)             | 221 (1.2%)             | 221 (1.2%)             | 221 (1.2%)             | 221 (1.2%)             |                                            |               |               |               |               |               |               |               |               |               |               |               |               |               |               |               |               |                      |               |               |               |               |               |               |               |               |               |               |               |               |               |               |               |               |                                           |               |               |               |               |               |               |               |               |               |               |               |               |               |               |               |               |                             |               |               |               |               |               |               |               |               |               |               |               |               |               |               |               |               |                            |             |             |               |               |               |               |               |               |               |               |               |               |               |               |               |               |                                      |               |               |               |               |               |               |               |               |               |               |               |               |                |                |                |                |                                              |               |               |               |               |               |               |               |               |               |               |               |               |               |               |               |               |                                            |               |               |               |               |               |               |               |               |               |               |               |               |               |               |               |               |                                              |               |               |               |               |               |               |               |               |               |               |               |               |                |                |                |                |                                           |               |               |               |               |               |               |               |               |               |               |               |               |               |               |               |               |                          |               |               |               |               |               |               |               |               |               |               |               |               |               |               |               |               |                                            |             |             |               |               |               |               |               |               |               |               |               |               |               |               |               |               |                             |               |               |               |               |               |               |               |               |               |               |               |               |               |               |               |               |                                           |               |               |               |               |               |               |               |               |               |               |               |               |               |               |               |               |                                      |               |               |               |               |               |               |               |               |               |               |               |               |               |               |               |               |                                              |               |               |               |               |               |               |               |               |               |               |               |               |               |               |               |               |                                             |               |               |               |               |               |               |               |               |               |               |               |               |               |               |               |               |                                            |               |               |               |               |               |               |               |               |               |               |               |               |               |               |               |               |                                                 |             |             |             |             |             |             |             |             |            |            |            |            |              |              |              |              |                                              |               |               |               |               |               |               |               |               |               |               |               |               |               |               |               |               |                                                 |               |               |               |               |               |               |               |               |               |               |               |               |               |               |               |               |                          |               |               |               |               |               |               |               |               |               |               |               |               |               |               |               |               |                                           |               |               |               |               |               |               |               |               |               |               |               |               |               |               |               |               |                          |               |               |               |               |               |               |               |               |               |               |               |               |               |               |               |               |                                      |               |               |               |               |               |               |               |               |               |               |               |               |               |               |               |               |                                              |               |               |               |               |               |               |               |               |               |               |               |               |               |               |               |               |                                           |            |            |             |             |             |             |             |             |             |             |             |             |               |               |               |               |                                                 |               |               |               |               |               |               |               |               |               |               |               |               |               |               |               |               |                                              |               |               |               |               |               |               |               |               |               |               |               |               |               |               |               |               |                                             |               |               |             |             |             |             |             |             |               |               |               |               |               |               |               |               |                                            |               |               |               |               |               |               |               |               |             |             |               |               |               |               |               |               |                                                 |             |             |             |             |             |             |             |             |             |             |             |             |               |               |               |               |                                           |               |               |             |             |             |             |             |             |               |               |               |               |               |               |               |               |                          |               |               |               |               |               |               |               |               |               |               |               |               |               |               |               |               |                                      |               |               |               |               |               |               |               |               |               |               |               |               |               |               |               |               |                                              |             |             |             |             |             |             |             |             |             |             |            |            |               |               |               |               |                          |               |               |               |               |               |               |               |               |               |               |               |               |               |               |               |               |                                                 |               |               |               |               |               |               |               |               |               |               |               |               |               |               |               |               |                                              |             |             |             |             |             |             |             |             |             |             |               |               |               |               |               |               |                      |               |               |             |             |             |             |             |             |               |               |               |               |               |               |               |               |                                                 |               |               |               |               |               |               |               |               |             |             |               |               |               |               |               |               |                                        |             |             |             |             |             |             |             |             |             |             |               |               |               |               |               |               |                                           |               |               |             |             |             |             |             |             |               |               |               |               |               |               |               |               |                          |               |               |               |               |               |               |               |               |               |               |               |               |               |               |               |               |              |               |               |               |               |               |               |               |               |               |               |               |               |               |               |               |               |                                             |           |           |            |            |            |            |            |            |           |           |           |           |            |            |            |            |                          |               |               |               |               |               |               |               |               |               |               |               |               |               |               |               |               |                                                 |               |               |               |               |               |               |               |               |               |               |               |               |               |               |               |               |                                             |             |             |             |             |             |             |             |             |             |             |               |               |               |               |               |               |                      |            |            |            |            |            |            |            |            |            |            |            |            |            |              |              |              |                                                 |           |           |           |           |           |           |           |           |           |           |            |            |            |            |            |            |         |             |             |             |             |             |             |             |             |             |             |               |               |               |               |               |               |                      |           |           |           |           |           |           |           |           |           |           |           |           |            |            |            |  |
| Congestive heart failure                        | 1,127 (34.0%)         | 1,127 (34.0%)         | 1,114 (25.0%)         | 1,114 (25.0%)         | 1,114 (25.0%)         | 1,114 (25.0%)         | 1,114 (25.0%)         | 1,114 (25.0%)         | 924 (21.2%)           | 924 (21.2%)           | 874 (14.7%)           | 874 (14.7%)           | 3,466 (19.4%)          | 3,466 (19.4%)          | 3,466 (19.4%)          | 3,466 (19.4%)          |                                            |               |               |               |               |               |               |               |               |               |               |               |               |               |               |               |               |                      |               |               |               |               |               |               |               |               |               |               |               |               |               |               |               |               |                                           |               |               |               |               |               |               |               |               |               |               |               |               |               |               |               |               |                             |               |               |               |               |               |               |               |               |               |               |               |               |               |               |               |               |                            |             |             |               |               |               |               |               |               |               |               |               |               |               |               |               |               |                                      |               |               |               |               |               |               |               |               |               |               |               |               |                |                |                |                |                                              |               |               |               |               |               |               |               |               |               |               |               |               |               |               |               |               |                                            |               |               |               |               |               |               |               |               |               |               |               |               |               |               |               |               |                                              |               |               |               |               |               |               |               |               |               |               |               |               |                |                |                |                |                                           |               |               |               |               |               |               |               |               |               |               |               |               |               |               |               |               |                          |               |               |               |               |               |               |               |               |               |               |               |               |               |               |               |               |                                            |             |             |               |               |               |               |               |               |               |               |               |               |               |               |               |               |                             |               |               |               |               |               |               |               |               |               |               |               |               |               |               |               |               |                                           |               |               |               |               |               |               |               |               |               |               |               |               |               |               |               |               |                                      |               |               |               |               |               |               |               |               |               |               |               |               |               |               |               |               |                                              |               |               |               |               |               |               |               |               |               |               |               |               |               |               |               |               |                                             |               |               |               |               |               |               |               |               |               |               |               |               |               |               |               |               |                                            |               |               |               |               |               |               |               |               |               |               |               |               |               |               |               |               |                                                 |             |             |             |             |             |             |             |             |            |            |            |            |              |              |              |              |                                              |               |               |               |               |               |               |               |               |               |               |               |               |               |               |               |               |                                                 |               |               |               |               |               |               |               |               |               |               |               |               |               |               |               |               |                          |               |               |               |               |               |               |               |               |               |               |               |               |               |               |               |               |                                           |               |               |               |               |               |               |               |               |               |               |               |               |               |               |               |               |                          |               |               |               |               |               |               |               |               |               |               |               |               |               |               |               |               |                                      |               |               |               |               |               |               |               |               |               |               |               |               |               |               |               |               |                                              |               |               |               |               |               |               |               |               |               |               |               |               |               |               |               |               |                                           |            |            |             |             |             |             |             |             |             |             |             |             |               |               |               |               |                                                 |               |               |               |               |               |               |               |               |               |               |               |               |               |               |               |               |                                              |               |               |               |               |               |               |               |               |               |               |               |               |               |               |               |               |                                             |               |               |             |             |             |             |             |             |               |               |               |               |               |               |               |               |                                            |               |               |               |               |               |               |               |               |             |             |               |               |               |               |               |               |                                                 |             |             |             |             |             |             |             |             |             |             |             |             |               |               |               |               |                                           |               |               |             |             |             |             |             |             |               |               |               |               |               |               |               |               |                          |               |               |               |               |               |               |               |               |               |               |               |               |               |               |               |               |                                      |               |               |               |               |               |               |               |               |               |               |               |               |               |               |               |               |                                              |             |             |             |             |             |             |             |             |             |             |            |            |               |               |               |               |                          |               |               |               |               |               |               |               |               |               |               |               |               |               |               |               |               |                                                 |               |               |               |               |               |               |               |               |               |               |               |               |               |               |               |               |                                              |             |             |             |             |             |             |             |             |             |             |               |               |               |               |               |               |                      |               |               |             |             |             |             |             |             |               |               |               |               |               |               |               |               |                                                 |               |               |               |               |               |               |               |               |             |             |               |               |               |               |               |               |                                        |             |             |             |             |             |             |             |             |             |             |               |               |               |               |               |               |                                           |               |               |             |             |             |             |             |             |               |               |               |               |               |               |               |               |                          |               |               |               |               |               |               |               |               |               |               |               |               |               |               |               |               |              |               |               |               |               |               |               |               |               |               |               |               |               |               |               |               |               |                                             |           |           |            |            |            |            |            |            |           |           |           |           |            |            |            |            |                          |               |               |               |               |               |               |               |               |               |               |               |               |               |               |               |               |                                                 |               |               |               |               |               |               |               |               |               |               |               |               |               |               |               |               |                                             |             |             |             |             |             |             |             |             |             |             |               |               |               |               |               |               |                      |            |            |            |            |            |            |            |            |            |            |            |            |            |              |              |              |                                                 |           |           |           |           |           |           |           |           |           |           |            |            |            |            |            |            |         |             |             |             |             |             |             |             |             |             |             |               |               |               |               |               |               |                      |           |           |           |           |           |           |           |           |           |           |           |           |            |            |            |  |
| Ischemic heart/coronary artery disease          | 217 (7.1%)            | 184 (5.5%)            | 541 (12.2%)           | 441 (10.2%)           | 441 (10.2%)           | 441 (10.2%)           | 441 (10.2%)           | 441 (10.2%)           | 152 (3.5%)            | 152 (3.5%)            | 25 (0.4%)             | 21 (0.4%)             | 508 (2.8%)             | 425 (2.4%)             | 508 (2.8%)             | 425 (2.4%)             |                                            |               |               |               |               |               |               |               |               |               |               |               |               |               |               |               |               |                      |               |               |               |               |               |               |               |               |               |               |               |               |               |               |               |               |                                           |               |               |               |               |               |               |               |               |               |               |               |               |               |               |               |               |                             |               |               |               |               |               |               |               |               |               |               |               |               |               |               |               |               |                            |             |             |               |               |               |               |               |               |               |               |               |               |               |               |               |               |                                      |               |               |               |               |               |               |               |               |               |               |               |               |                |                |                |                |                                              |               |               |               |               |               |               |               |               |               |               |               |               |               |               |               |               |                                            |               |               |               |               |               |               |               |               |               |               |               |               |               |               |               |               |                                              |               |               |               |               |               |               |               |               |               |               |               |               |                |                |                |                |                                           |               |               |               |               |               |               |               |               |               |               |               |               |               |               |               |               |                          |               |               |               |               |               |               |               |               |               |               |               |               |               |               |               |               |                                            |             |             |               |               |               |               |               |               |               |               |               |               |               |               |               |               |                             |               |               |               |               |               |               |               |               |               |               |               |               |               |               |               |               |                                           |               |               |               |               |               |               |               |               |               |               |               |               |               |               |               |               |                                      |               |               |               |               |               |               |               |               |               |               |               |               |               |               |               |               |                                              |               |               |               |               |               |               |               |               |               |               |               |               |               |               |               |               |                                             |               |               |               |               |               |               |               |               |               |               |               |               |               |               |               |               |                                            |               |               |               |               |               |               |               |               |               |               |               |               |               |               |               |               |                                                 |             |             |             |             |             |             |             |             |            |            |            |            |              |              |              |              |                                              |               |               |               |               |               |               |               |               |               |               |               |               |               |               |               |               |                                                 |               |               |               |               |               |               |               |               |               |               |               |               |               |               |               |               |                          |               |               |               |               |               |               |               |               |               |               |               |               |               |               |               |               |                                           |               |               |               |               |               |               |               |               |               |               |               |               |               |               |               |               |                          |               |               |               |               |               |               |               |               |               |               |               |               |               |               |               |               |                                      |               |               |               |               |               |               |               |               |               |               |               |               |               |               |               |               |                                              |               |               |               |               |               |               |               |               |               |               |               |               |               |               |               |               |                                           |            |            |             |             |             |             |             |             |             |             |             |             |               |               |               |               |                                                 |               |               |               |               |               |               |               |               |               |               |               |               |               |               |               |               |                                              |               |               |               |               |               |               |               |               |               |               |               |               |               |               |               |               |                                             |               |               |             |             |             |             |             |             |               |               |               |               |               |               |               |               |                                            |               |               |               |               |               |               |               |               |             |             |               |               |               |               |               |               |                                                 |             |             |             |             |             |             |             |             |             |             |             |             |               |               |               |               |                                           |               |               |             |             |             |             |             |             |               |               |               |               |               |               |               |               |                          |               |               |               |               |               |               |               |               |               |               |               |               |               |               |               |               |                                      |               |               |               |               |               |               |               |               |               |               |               |               |               |               |               |               |                                              |             |             |             |             |             |             |             |             |             |             |            |            |               |               |               |               |                          |               |               |               |               |               |               |               |               |               |               |               |               |               |               |               |               |                                                 |               |               |               |               |               |               |               |               |               |               |               |               |               |               |               |               |                                              |             |             |             |             |             |             |             |             |             |             |               |               |               |               |               |               |                      |               |               |             |             |             |             |             |             |               |               |               |               |               |               |               |               |                                                 |               |               |               |               |               |               |               |               |             |             |               |               |               |               |               |               |                                        |             |             |             |             |             |             |             |             |             |             |               |               |               |               |               |               |                                           |               |               |             |             |             |             |             |             |               |               |               |               |               |               |               |               |                          |               |               |               |               |               |               |               |               |               |               |               |               |               |               |               |               |              |               |               |               |               |               |               |               |               |               |               |               |               |               |               |               |               |                                             |           |           |            |            |            |            |            |            |           |           |           |           |            |            |            |            |                          |               |               |               |               |               |               |               |               |               |               |               |               |               |               |               |               |                                                 |               |               |               |               |               |               |               |               |               |               |               |               |               |               |               |               |                                             |             |             |             |             |             |             |             |             |             |             |               |               |               |               |               |               |                      |            |            |            |            |            |            |            |            |            |            |            |            |            |              |              |              |                                                 |           |           |           |           |           |           |           |           |           |           |            |            |            |            |            |            |         |             |             |             |             |             |             |             |             |             |             |               |               |               |               |               |               |                      |           |           |           |           |           |           |           |           |           |           |           |           |            |            |            |  |
| Dementia                                        | 1,269 (39.4%)         | 1,269 (39.4%)         | 942 (21.6%)           | 942 (21.6%)           | 942 (21.6%)           | 942 (21.6%)           | 942 (21.6%)           | 942 (21.6%)           | 1,100 (25.0%)         | 1,100 (25.0%)         | 1,040 (17.6%)         | 1,040 (17.6%)         | 4,342 (24.3%)          | 4,342 (24.3%)          | 4,342 (24.3%)          | 4,342 (24.3%)          |                                            |               |               |               |               |               |               |               |               |               |               |               |               |               |               |               |               |                      |               |               |               |               |               |               |               |               |               |               |               |               |               |               |               |               |                                           |               |               |               |               |               |               |               |               |               |               |               |               |               |               |               |               |                             |               |               |               |               |               |               |               |               |               |               |               |               |               |               |               |               |                            |             |             |               |               |               |               |               |               |               |               |               |               |               |               |               |               |                                      |               |               |               |               |               |               |               |               |               |               |               |               |                |                |                |                |                                              |               |               |               |               |               |               |               |               |               |               |               |               |               |               |               |               |                                            |               |               |               |               |               |               |               |               |               |               |               |               |               |               |               |               |                                              |               |               |               |               |               |               |               |               |               |               |               |               |                |                |                |                |                                           |               |               |               |               |               |               |               |               |               |               |               |               |               |               |               |               |                          |               |               |               |               |               |               |               |               |               |               |               |               |               |               |               |               |                                            |             |             |               |               |               |               |               |               |               |               |               |               |               |               |               |               |                             |               |               |               |               |               |               |               |               |               |               |               |               |               |               |               |               |                                           |               |               |               |               |               |               |               |               |               |               |               |               |               |               |               |               |                                      |               |               |               |               |               |               |               |               |               |               |               |               |               |               |               |               |                                              |               |               |               |               |               |               |               |               |               |               |               |               |               |               |               |               |                                             |               |               |               |               |               |               |               |               |               |               |               |               |               |               |               |               |                                            |               |               |               |               |               |               |               |               |               |               |               |               |               |               |               |               |                                                 |             |             |             |             |             |             |             |             |            |            |            |            |              |              |              |              |                                              |               |               |               |               |               |               |               |               |               |               |               |               |               |               |               |               |                                                 |               |               |               |               |               |               |               |               |               |               |               |               |               |               |               |               |                          |               |               |               |               |               |               |               |               |               |               |               |               |               |               |               |               |                                           |               |               |               |               |               |               |               |               |               |               |               |               |               |               |               |               |                          |               |               |               |               |               |               |               |               |               |               |               |               |               |               |               |               |                                      |               |               |               |               |               |               |               |               |               |               |               |               |               |               |               |               |                                              |               |               |               |               |               |               |               |               |               |               |               |               |               |               |               |               |                                           |            |            |             |             |             |             |             |             |             |             |             |             |               |               |               |               |                                                 |               |               |               |               |               |               |               |               |               |               |               |               |               |               |               |               |                                              |               |               |               |               |               |               |               |               |               |               |               |               |               |               |               |               |                                             |               |               |             |             |             |             |             |             |               |               |               |               |               |               |               |               |                                            |               |               |               |               |               |               |               |               |             |             |               |               |               |               |               |               |                                                 |             |             |             |             |             |             |             |             |             |             |             |             |               |               |               |               |                                           |               |               |             |             |             |             |             |             |               |               |               |               |               |               |               |               |                          |               |               |               |               |               |               |               |               |               |               |               |               |               |               |               |               |                                      |               |               |               |               |               |               |               |               |               |               |               |               |               |               |               |               |                                              |             |             |             |             |             |             |             |             |             |             |            |            |               |               |               |               |                          |               |               |               |               |               |               |               |               |               |               |               |               |               |               |               |               |                                                 |               |               |               |               |               |               |               |               |               |               |               |               |               |               |               |               |                                              |             |             |             |             |             |             |             |             |             |             |               |               |               |               |               |               |                      |               |               |             |             |             |             |             |             |               |               |               |               |               |               |               |               |                                                 |               |               |               |               |               |               |               |               |             |             |               |               |               |               |               |               |                                        |             |             |             |             |             |             |             |             |             |             |               |               |               |               |               |               |                                           |               |               |             |             |             |             |             |             |               |               |               |               |               |               |               |               |                          |               |               |               |               |               |               |               |               |               |               |               |               |               |               |               |               |              |               |               |               |               |               |               |               |               |               |               |               |               |               |               |               |               |                                             |           |           |            |            |            |            |            |            |           |           |           |           |            |            |            |            |                          |               |               |               |               |               |               |               |               |               |               |               |               |               |               |               |               |                                                 |               |               |               |               |               |               |               |               |               |               |               |               |               |               |               |               |                                             |             |             |             |             |             |             |             |             |             |             |               |               |               |               |               |               |                      |            |            |            |            |            |            |            |            |            |            |            |            |            |              |              |              |                                                 |           |           |           |           |           |           |           |           |           |           |            |            |            |            |            |            |         |             |             |             |             |             |             |             |             |             |             |               |               |               |               |               |               |                      |           |           |           |           |           |           |           |           |           |           |           |           |            |            |            |  |
| Diabetes                                        | 708 (22.1%)           | 708 (22.1%)           | 1,113 (25.3%)         | 1,113 (25.3%)         | 1,113 (25.3%)         | 1,113 (25.3%)         | 1,113 (25.3%)         | 1,113 (25.3%)         | 978 (22.5%)           | 978 (22.5%)           | 1,031 (17.8%)         | 1,031 (17.8%)         | 3,271 (18.3%)          | 3,271 (18.3%)          | 3,271 (18.3%)          | 3,271 (18.3%)          |                                            |               |               |               |               |               |               |               |               |               |               |               |               |               |               |               |               |                      |               |               |               |               |               |               |               |               |               |               |               |               |               |               |               |               |                                           |               |               |               |               |               |               |               |               |               |               |               |               |               |               |               |               |                             |               |               |               |               |               |               |               |               |               |               |               |               |               |               |               |               |                            |             |             |               |               |               |               |               |               |               |               |               |               |               |               |               |               |                                      |               |               |               |               |               |               |               |               |               |               |               |               |                |                |                |                |                                              |               |               |               |               |               |               |               |               |               |               |               |               |               |               |               |               |                                            |               |               |               |               |               |               |               |               |               |               |               |               |               |               |               |               |                                              |               |               |               |               |               |               |               |               |               |               |               |               |                |                |                |                |                                           |               |               |               |               |               |               |               |               |               |               |               |               |               |               |               |               |                          |               |               |               |               |               |               |               |               |               |               |               |               |               |               |               |               |                                            |             |             |               |               |               |               |               |               |               |               |               |               |               |               |               |               |                             |               |               |               |               |               |               |               |               |               |               |               |               |               |               |               |               |                                           |               |               |               |               |               |               |               |               |               |               |               |               |               |               |               |               |                                      |               |               |               |               |               |               |               |               |               |               |               |               |               |               |               |               |                                              |               |               |               |               |               |               |               |               |               |               |               |               |               |               |               |               |                                             |               |               |               |               |               |               |               |               |               |               |               |               |               |               |               |               |                                            |               |               |               |               |               |               |               |               |               |               |               |               |               |               |               |               |                                                 |             |             |             |             |             |             |             |             |            |            |            |            |              |              |              |              |                                              |               |               |               |               |               |               |               |               |               |               |               |               |               |               |               |               |                                                 |               |               |               |               |               |               |               |               |               |               |               |               |               |               |               |               |                          |               |               |               |               |               |               |               |               |               |               |               |               |               |               |               |               |                                           |               |               |               |               |               |               |               |               |               |               |               |               |               |               |               |               |                          |               |               |               |               |               |               |               |               |               |               |               |               |               |               |               |               |                                      |               |               |               |               |               |               |               |               |               |               |               |               |               |               |               |               |                                              |               |               |               |               |               |               |               |               |               |               |               |               |               |               |               |               |                                           |            |            |             |             |             |             |             |             |             |             |             |             |               |               |               |               |                                                 |               |               |               |               |               |               |               |               |               |               |               |               |               |               |               |               |                                              |               |               |               |               |               |               |               |               |               |               |               |               |               |               |               |               |                                             |               |               |             |             |             |             |             |             |               |               |               |               |               |               |               |               |                                            |               |               |               |               |               |               |               |               |             |             |               |               |               |               |               |               |                                                 |             |             |             |             |             |             |             |             |             |             |             |             |               |               |               |               |                                           |               |               |             |             |             |             |             |             |               |               |               |               |               |               |               |               |                          |               |               |               |               |               |               |               |               |               |               |               |               |               |               |               |               |                                      |               |               |               |               |               |               |               |               |               |               |               |               |               |               |               |               |                                              |             |             |             |             |             |             |             |             |             |             |            |            |               |               |               |               |                          |               |               |               |               |               |               |               |               |               |               |               |               |               |               |               |               |                                                 |               |               |               |               |               |               |               |               |               |               |               |               |               |               |               |               |                                              |             |             |             |             |             |             |             |             |             |             |               |               |               |               |               |               |                      |               |               |             |             |             |             |             |             |               |               |               |               |               |               |               |               |                                                 |               |               |               |               |               |               |               |               |             |             |               |               |               |               |               |               |                                        |             |             |             |             |             |             |             |             |             |             |               |               |               |               |               |               |                                           |               |               |             |             |             |             |             |             |               |               |               |               |               |               |               |               |                          |               |               |               |               |               |               |               |               |               |               |               |               |               |               |               |               |              |               |               |               |               |               |               |               |               |               |               |               |               |               |               |               |               |                                             |           |           |            |            |            |            |            |            |           |           |           |           |            |            |            |            |                          |               |               |               |               |               |               |               |               |               |               |               |               |               |               |               |               |                                                 |               |               |               |               |               |               |               |               |               |               |               |               |               |               |               |               |                                             |             |             |             |             |             |             |             |             |             |             |               |               |               |               |               |               |                      |            |            |            |            |            |            |            |            |            |            |            |            |            |              |              |              |                                                 |           |           |           |           |           |           |           |           |           |           |            |            |            |            |            |            |         |             |             |             |             |             |             |             |             |             |             |               |               |               |               |               |               |                      |           |           |           |           |           |           |           |           |           |           |           |           |            |            |            |  |
| Disability                                      | 170 (5.1%)            | 170 (5.1%)            | 436 (10.0%)           | 436 (10.0%)           | 436 (10.0%)           | 436 (10.0%)           | 436 (10.0%)           | 436 (10.0%)           | 323 (7.4%)            | 323 (7.4%)            | 371 (6.4%)            | 371 (6.4%)            | 1,669 (9.3%)           | 1,669 (9.3%)           | 1,669 (9.3%)           | 1,669 (9.3%)           |                                            |               |               |               |               |               |               |               |               |               |               |               |               |               |               |               |               |                      |               |               |               |               |               |               |               |               |               |               |               |               |               |               |               |               |                                           |               |               |               |               |               |               |               |               |               |               |               |               |               |               |               |               |                             |               |               |               |               |               |               |               |               |               |               |               |               |               |               |               |               |                            |             |             |               |               |               |               |               |               |               |               |               |               |               |               |               |               |                                      |               |               |               |               |               |               |               |               |               |               |               |               |                |                |                |                |                                              |               |               |               |               |               |               |               |               |               |               |               |               |               |               |               |               |                                            |               |               |               |               |               |               |               |               |               |               |               |               |               |               |               |               |                                              |               |               |               |               |               |               |               |               |               |               |               |               |                |                |                |                |                                           |               |               |               |               |               |               |               |               |               |               |               |               |               |               |               |               |                          |               |               |               |               |               |               |               |               |               |               |               |               |               |               |               |               |                                            |             |             |               |               |               |               |               |               |               |               |               |               |               |               |               |               |                             |               |               |               |               |               |               |               |               |               |               |               |               |               |               |               |               |                                           |               |               |               |               |               |               |               |               |               |               |               |               |               |               |               |               |                                      |               |               |               |               |               |               |               |               |               |               |               |               |               |               |               |               |                                              |               |               |               |               |               |               |               |               |               |               |               |               |               |               |               |               |                                             |               |               |               |               |               |               |               |               |               |               |               |               |               |               |               |               |                                            |               |               |               |               |               |               |               |               |               |               |               |               |               |               |               |               |                                                 |             |             |             |             |             |             |             |             |            |            |            |            |              |              |              |              |                                              |               |               |               |               |               |               |               |               |               |               |               |               |               |               |               |               |                                                 |               |               |               |               |               |               |               |               |               |               |               |               |               |               |               |               |                          |               |               |               |               |               |               |               |               |               |               |               |               |               |               |               |               |                                           |               |               |               |               |               |               |               |               |               |               |               |               |               |               |               |               |                          |               |               |               |               |               |               |               |               |               |               |               |               |               |               |               |               |                                      |               |               |               |               |               |               |               |               |               |               |               |               |               |               |               |               |                                              |               |               |               |               |               |               |               |               |               |               |               |               |               |               |               |               |                                           |            |            |             |             |             |             |             |             |             |             |             |             |               |               |               |               |                                                 |               |               |               |               |               |               |               |               |               |               |               |               |               |               |               |               |                                              |               |               |               |               |               |               |               |               |               |               |               |               |               |               |               |               |                                             |               |               |             |             |             |             |             |             |               |               |               |               |               |               |               |               |                                            |               |               |               |               |               |               |               |               |             |             |               |               |               |               |               |               |                                                 |             |             |             |             |             |             |             |             |             |             |             |             |               |               |               |               |                                           |               |               |             |             |             |             |             |             |               |               |               |               |               |               |               |               |                          |               |               |               |               |               |               |               |               |               |               |               |               |               |               |               |               |                                      |               |               |               |               |               |               |               |               |               |               |               |               |               |               |               |               |                                              |             |             |             |             |             |             |             |             |             |             |            |            |               |               |               |               |                          |               |               |               |               |               |               |               |               |               |               |               |               |               |               |               |               |                                                 |               |               |               |               |               |               |               |               |               |               |               |               |               |               |               |               |                                              |             |             |             |             |             |             |             |             |             |             |               |               |               |               |               |               |                      |               |               |             |             |             |             |             |             |               |               |               |               |               |               |               |               |                                                 |               |               |               |               |               |               |               |               |             |             |               |               |               |               |               |               |                                        |             |             |             |             |             |             |             |             |             |             |               |               |               |               |               |               |                                           |               |               |             |             |             |             |             |             |               |               |               |               |               |               |               |               |                          |               |               |               |               |               |               |               |               |               |               |               |               |               |               |               |               |              |               |               |               |               |               |               |               |               |               |               |               |               |               |               |               |               |                                             |           |           |            |            |            |            |            |            |           |           |           |           |            |            |            |            |                          |               |               |               |               |               |               |               |               |               |               |               |               |               |               |               |               |                                                 |               |               |               |               |               |               |               |               |               |               |               |               |               |               |               |               |                                             |             |             |             |             |             |             |             |             |             |             |               |               |               |               |               |               |                      |            |            |            |            |            |            |            |            |            |            |            |            |            |              |              |              |                                                 |           |           |           |           |           |           |           |           |           |           |            |            |            |            |            |            |         |             |             |             |             |             |             |             |             |             |             |               |               |               |               |               |               |                      |           |           |           |           |           |           |           |           |           |           |           |           |            |            |            |  |
| Fractures involving the lower extremities       | 76 (2.3%)             | 76 (2.3%)             | 217 (5.0%)            | 217 (5.0%)            | 217 (5.0%)            | 217 (5.0%)            | 217 (5.0%)            | 217 (5.0%)            | 44 (1.0%)             | 44 (1.0%)             | 43 (0.8%)             | 43 (0.8%)             | 191 (1.1%)             | 191 (1.1%)             | 191 (1.1%)             | 191 (1.1%)             |                                            |               |               |               |               |               |               |               |               |               |               |               |               |               |               |               |               |                      |               |               |               |               |               |               |               |               |               |               |               |               |               |               |               |               |                                           |               |               |               |               |               |               |               |               |               |               |               |               |               |               |               |               |                             |               |               |               |               |               |               |               |               |               |               |               |               |               |               |               |               |                            |             |             |               |               |               |               |               |               |               |               |               |               |               |               |               |               |                                      |               |               |               |               |               |               |               |               |               |               |               |               |                |                |                |                |                                              |               |               |               |               |               |               |               |               |               |               |               |               |               |               |               |               |                                            |               |               |               |               |               |               |               |               |               |               |               |               |               |               |               |               |                                              |               |               |               |               |               |               |               |               |               |               |               |               |                |                |                |                |                                           |               |               |               |               |               |               |               |               |               |               |               |               |               |               |               |               |                          |               |               |               |               |               |               |               |               |               |               |               |               |               |               |               |               |                                            |             |             |               |               |               |               |               |               |               |               |               |               |               |               |               |               |                             |               |               |               |               |               |               |               |               |               |               |               |               |               |               |               |               |                                           |               |               |               |               |               |               |               |               |               |               |               |               |               |               |               |               |                                      |               |               |               |               |               |               |               |               |               |               |               |               |               |               |               |               |                                              |               |               |               |               |               |               |               |               |               |               |               |               |               |               |               |               |                                             |               |               |               |               |               |               |               |               |               |               |               |               |               |               |               |               |                                            |               |               |               |               |               |               |               |               |               |               |               |               |               |               |               |               |                                                 |             |             |             |             |             |             |             |             |            |            |            |            |              |              |              |              |                                              |               |               |               |               |               |               |               |               |               |               |               |               |               |               |               |               |                                                 |               |               |               |               |               |               |               |               |               |               |               |               |               |               |               |               |                          |               |               |               |               |               |               |               |               |               |               |               |               |               |               |               |               |                                           |               |               |               |               |               |               |               |               |               |               |               |               |               |               |               |               |                          |               |               |               |               |               |               |               |               |               |               |               |               |               |               |               |               |                                      |               |               |               |               |               |               |               |               |               |               |               |               |               |               |               |               |                                              |               |               |               |               |               |               |               |               |               |               |               |               |               |               |               |               |                                           |            |            |             |             |             |             |             |             |             |             |             |             |               |               |               |               |                                                 |               |               |               |               |               |               |               |               |               |               |               |               |               |               |               |               |                                              |               |               |               |               |               |               |               |               |               |               |               |               |               |               |               |               |                                             |               |               |             |             |             |             |             |             |               |               |               |               |               |               |               |               |                                            |               |               |               |               |               |               |               |               |             |             |               |               |               |               |               |               |                                                 |             |             |             |             |             |             |             |             |             |             |             |             |               |               |               |               |                                           |               |               |             |             |             |             |             |             |               |               |               |               |               |               |               |               |                          |               |               |               |               |               |               |               |               |               |               |               |               |               |               |               |               |                                      |               |               |               |               |               |               |               |               |               |               |               |               |               |               |               |               |                                              |             |             |             |             |             |             |             |             |             |             |            |            |               |               |               |               |                          |               |               |               |               |               |               |               |               |               |               |               |               |               |               |               |               |                                                 |               |               |               |               |               |               |               |               |               |               |               |               |               |               |               |               |                                              |             |             |             |             |             |             |             |             |             |             |               |               |               |               |               |               |                      |               |               |             |             |             |             |             |             |               |               |               |               |               |               |               |               |                                                 |               |               |               |               |               |               |               |               |             |             |               |               |               |               |               |               |                                        |             |             |             |             |             |             |             |             |             |             |               |               |               |               |               |               |                                           |               |               |             |             |             |             |             |             |               |               |               |               |               |               |               |               |                          |               |               |               |               |               |               |               |               |               |               |               |               |               |               |               |               |              |               |               |               |               |               |               |               |               |               |               |               |               |               |               |               |               |                                             |           |           |            |            |            |            |            |            |           |           |           |           |            |            |            |            |                          |               |               |               |               |               |               |               |               |               |               |               |               |               |               |               |               |                                                 |               |               |               |               |               |               |               |               |               |               |               |               |               |               |               |               |                                             |             |             |             |             |             |             |             |             |             |             |               |               |               |               |               |               |                      |            |            |            |            |            |            |            |            |            |            |            |            |            |              |              |              |                                                 |           |           |           |           |           |           |           |           |           |           |            |            |            |            |            |            |         |             |             |             |             |             |             |             |             |             |             |               |               |               |               |               |               |                      |           |           |           |           |           |           |           |           |           |           |           |           |            |            |            |  |
| Hemiplegia or paraplegia                        | 2,150 (64.8%)         | 2,150 (64.8%)         | 1,747 (40.1%)         | 1,668 (38.3%)         | 1,668 (38.3%)         | 1,668 (38.3%)         | 1,668 (38.3%)         | 1,668 (38.3%)         | 2,120 (50.0%)         | 2,120 (50.0%)         | 1,907 (32.0%)         | 1,907 (32.0%)         | 7,875 (44.0%)          | 7,875 (44.0%)          | 7,875 (44.0%)          | 7,875 (44.0%)          |                                            |               |               |               |               |               |               |               |               |               |               |               |               |               |               |               |               |                      |               |               |               |               |               |               |               |               |               |               |               |               |               |               |               |               |                                           |               |               |               |               |               |               |               |               |               |               |               |               |               |               |               |               |                             |               |               |               |               |               |               |               |               |               |               |               |               |               |               |               |               |                            |             |             |               |               |               |               |               |               |               |               |               |               |               |               |               |               |                                      |               |               |               |               |               |               |               |               |               |               |               |               |                |                |                |                |                                              |               |               |               |               |               |               |               |               |               |               |               |               |               |               |               |               |                                            |               |               |               |               |               |               |               |               |               |               |               |               |               |               |               |               |                                              |               |               |               |               |               |               |               |               |               |               |               |               |                |                |                |                |                                           |               |               |               |               |               |               |               |               |               |               |               |               |               |               |               |               |                          |               |               |               |               |               |               |               |               |               |               |               |               |               |               |               |               |                                            |             |             |               |               |               |               |               |               |               |               |               |               |               |               |               |               |                             |               |               |               |               |               |               |               |               |               |               |               |               |               |               |               |               |                                           |               |               |               |               |               |               |               |               |               |               |               |               |               |               |               |               |                                      |               |               |               |               |               |               |               |               |               |               |               |               |               |               |               |               |                                              |               |               |               |               |               |               |               |               |               |               |               |               |               |               |               |               |                                             |               |               |               |               |               |               |               |               |               |               |               |               |               |               |               |               |                                            |               |               |               |               |               |               |               |               |               |               |               |               |               |               |               |               |                                                 |             |             |             |             |             |             |             |             |            |            |            |            |              |              |              |              |                                              |               |               |               |               |               |               |               |               |               |               |               |               |               |               |               |               |                                                 |               |               |               |               |               |               |               |               |               |               |               |               |               |               |               |               |                          |               |               |               |               |               |               |               |               |               |               |               |               |               |               |               |               |                                           |               |               |               |               |               |               |               |               |               |               |               |               |               |               |               |               |                          |               |               |               |               |               |               |               |               |               |               |               |               |               |               |               |               |                                      |               |               |               |               |               |               |               |               |               |               |               |               |               |               |               |               |                                              |               |               |               |               |               |               |               |               |               |               |               |               |               |               |               |               |                                           |            |            |             |             |             |             |             |             |             |             |             |             |               |               |               |               |                                                 |               |               |               |               |               |               |               |               |               |               |               |               |               |               |               |               |                                              |               |               |               |               |               |               |               |               |               |               |               |               |               |               |               |               |                                             |               |               |             |             |             |             |             |             |               |               |               |               |               |               |               |               |                                            |               |               |               |               |               |               |               |               |             |             |               |               |               |               |               |               |                                                 |             |             |             |             |             |             |             |             |             |             |             |             |               |               |               |               |                                           |               |               |             |             |             |             |             |             |               |               |               |               |               |               |               |               |                          |               |               |               |               |               |               |               |               |               |               |               |               |               |               |               |               |                                      |               |               |               |               |               |               |               |               |               |               |               |               |               |               |               |               |                                              |             |             |             |             |             |             |             |             |             |             |            |            |               |               |               |               |                          |               |               |               |               |               |               |               |               |               |               |               |               |               |               |               |               |                                                 |               |               |               |               |               |               |               |               |               |               |               |               |               |               |               |               |                                              |             |             |             |             |             |             |             |             |             |             |               |               |               |               |               |               |                      |               |               |             |             |             |             |             |             |               |               |               |               |               |               |               |               |                                                 |               |               |               |               |               |               |               |               |             |             |               |               |               |               |               |               |                                        |             |             |             |             |             |             |             |             |             |             |               |               |               |               |               |               |                                           |               |               |             |             |             |             |             |             |               |               |               |               |               |               |               |               |                          |               |               |               |               |               |               |               |               |               |               |               |               |               |               |               |               |              |               |               |               |               |               |               |               |               |               |               |               |               |               |               |               |               |                                             |           |           |            |            |            |            |            |            |           |           |           |           |            |            |            |            |                          |               |               |               |               |               |               |               |               |               |               |               |               |               |               |               |               |                                                 |               |               |               |               |               |               |               |               |               |               |               |               |               |               |               |               |                                             |             |             |             |             |             |             |             |             |             |             |               |               |               |               |               |               |                      |            |            |            |            |            |            |            |            |            |            |            |            |            |              |              |              |                                                 |           |           |           |           |           |           |           |           |           |           |            |            |            |            |            |            |         |             |             |             |             |             |             |             |             |             |             |               |               |               |               |               |               |                      |           |           |           |           |           |           |           |           |           |           |           |           |            |            |            |  |
| Hypertension                                    | 2,680 (80.8%)         | 2,680 (80.8%)         | 2,648 (79.6%)         | 2,648 (79.6%)         | 2,648 (79.6%)         | 2,648 (79.6%)         | 2,648 (79.6%)         | 2,648 (79.6%)         | 2,499 (58.9%)         | 2,499 (58.9%)         | 2,054 (34.3%)         | 2,054 (34.3%)         | 9,799 (54.8%)          | 9,799 (54.8%)          | 9,799 (54.8%)          | 9,799 (54.8%)          |                                            |               |               |               |               |               |               |               |               |               |               |               |               |               |               |               |               |                      |               |               |               |               |               |               |               |               |               |               |               |               |               |               |               |               |                                           |               |               |               |               |               |               |               |               |               |               |               |               |               |               |               |               |                             |               |               |               |               |               |               |               |               |               |               |               |               |               |               |               |               |                            |             |             |               |               |               |               |               |               |               |               |               |               |               |               |               |               |                                      |               |               |               |               |               |               |               |               |               |               |               |               |                |                |                |                |                                              |               |               |               |               |               |               |               |               |               |               |               |               |               |               |               |               |                                            |               |               |               |               |               |               |               |               |               |               |               |               |               |               |               |               |                                              |               |               |               |               |               |               |               |               |               |               |               |               |                |                |                |                |                                           |               |               |               |               |               |               |               |               |               |               |               |               |               |               |               |               |                          |               |               |               |               |               |               |               |               |               |               |               |               |               |               |               |               |                                            |             |             |               |               |               |               |               |               |               |               |               |               |               |               |               |               |                             |               |               |               |               |               |               |               |               |               |               |               |               |               |               |               |               |                                           |               |               |               |               |               |               |               |               |               |               |               |               |               |               |               |               |                                      |               |               |               |               |               |               |               |               |               |               |               |               |               |               |               |               |                                              |               |               |               |               |               |               |               |               |               |               |               |               |               |               |               |               |                                             |               |               |               |               |               |               |               |               |               |               |               |               |               |               |               |               |                                            |               |               |               |               |               |               |               |               |               |               |               |               |               |               |               |               |                                                 |             |             |             |             |             |             |             |             |            |            |            |            |              |              |              |              |                                              |               |               |               |               |               |               |               |               |               |               |               |               |               |               |               |               |                                                 |               |               |               |               |               |               |               |               |               |               |               |               |               |               |               |               |                          |               |               |               |               |               |               |               |               |               |               |               |               |               |               |               |               |                                           |               |               |               |               |               |               |               |               |               |               |               |               |               |               |               |               |                          |               |               |               |               |               |               |               |               |               |               |               |               |               |               |               |               |                                      |               |               |               |               |               |               |               |               |               |               |               |               |               |               |               |               |                                              |               |               |               |               |               |               |               |               |               |               |               |               |               |               |               |               |                                           |            |            |             |             |             |             |             |             |             |             |             |             |               |               |               |               |                                                 |               |               |               |               |               |               |               |               |               |               |               |               |               |               |               |               |                                              |               |               |               |               |               |               |               |               |               |               |               |               |               |               |               |               |                                             |               |               |             |             |             |             |             |             |               |               |               |               |               |               |               |               |                                            |               |               |               |               |               |               |               |               |             |             |               |               |               |               |               |               |                                                 |             |             |             |             |             |             |             |             |             |             |             |             |               |               |               |               |                                           |               |               |             |             |             |             |             |             |               |               |               |               |               |               |               |               |                          |               |               |               |               |               |               |               |               |               |               |               |               |               |               |               |               |                                      |               |               |               |               |               |               |               |               |               |               |               |               |               |               |               |               |                                              |             |             |             |             |             |             |             |             |             |             |            |            |               |               |               |               |                          |               |               |               |               |               |               |               |               |               |               |               |               |               |               |               |               |                                                 |               |               |               |               |               |               |               |               |               |               |               |               |               |               |               |               |                                              |             |             |             |             |             |             |             |             |             |             |               |               |               |               |               |               |                      |               |               |             |             |             |             |             |             |               |               |               |               |               |               |               |               |                                                 |               |               |               |               |               |               |               |               |             |             |               |               |               |               |               |               |                                        |             |             |             |             |             |             |             |             |             |             |               |               |               |               |               |               |                                           |               |               |             |             |             |             |             |             |               |               |               |               |               |               |               |               |                          |               |               |               |               |               |               |               |               |               |               |               |               |               |               |               |               |              |               |               |               |               |               |               |               |               |               |               |               |               |               |               |               |               |                                             |           |           |            |            |            |            |            |            |           |           |           |           |            |            |            |            |                          |               |               |               |               |               |               |               |               |               |               |               |               |               |               |               |               |                                                 |               |               |               |               |               |               |               |               |               |               |               |               |               |               |               |               |                                             |             |             |             |             |             |             |             |             |             |             |               |               |               |               |               |               |                      |            |            |            |            |            |            |            |            |            |            |            |            |            |              |              |              |                                                 |           |           |           |           |           |           |           |           |           |           |            |            |            |            |            |            |         |             |             |             |             |             |             |             |             |             |             |               |               |               |               |               |               |                      |           |           |           |           |           |           |           |           |           |           |           |           |            |            |            |  |
| Hypertension<br>inflammatory bowel syndrome     | 38 (1.1%)             | 35 (1.1%)             | 32 (0.7%)             | 37 (0.8%)             | 37 (0.8%)             | 37 (0.8%)             | 37 (0.8%)             | 37 (0.8%)             | 29 (0.7%)             | 29 (0.7%)             | 80 (1.3%)             | 94 (1.6%)             | 179 (1.0%)             | 190 (1.1%)             | 190 (1.1%)             | 190 (1.1%)             |                                            |               |               |               |               |               |               |               |               |               |               |               |               |               |               |               |               |                      |               |               |               |               |               |               |               |               |               |               |               |               |               |               |               |               |                                           |               |               |               |               |               |               |               |               |               |               |               |               |               |               |               |               |                             |               |               |               |               |               |               |               |               |               |               |               |               |               |               |               |               |                            |             |             |               |               |               |               |               |               |               |               |               |               |               |               |               |               |                                      |               |               |               |               |               |               |               |               |               |               |               |               |                |                |                |                |                                              |               |               |               |               |               |               |               |               |               |               |               |               |               |               |               |               |                                            |               |               |               |               |               |               |               |               |               |               |               |               |               |               |               |               |                                              |               |               |               |               |               |               |               |               |               |               |               |               |                |                |                |                |                                           |               |               |               |               |               |               |               |               |               |               |               |               |               |               |               |               |                          |               |               |               |               |               |               |               |               |               |               |               |               |               |               |               |               |                                            |             |             |               |               |               |               |               |               |               |               |               |               |               |               |               |               |                             |               |               |               |               |               |               |               |               |               |               |               |               |               |               |               |               |                                           |               |               |               |               |               |               |               |               |               |               |               |               |               |               |               |               |                                      |               |               |               |               |               |               |               |               |               |               |               |               |               |               |               |               |                                              |               |               |               |               |               |               |               |               |               |               |               |               |               |               |               |               |                                             |               |               |               |               |               |               |               |               |               |               |               |               |               |               |               |               |                                            |               |               |               |               |               |               |               |               |               |               |               |               |               |               |               |               |                                                 |             |             |             |             |             |             |             |             |            |            |            |            |              |              |              |              |                                              |               |               |               |               |               |               |               |               |               |               |               |               |               |               |               |               |                                                 |               |               |               |               |               |               |               |               |               |               |               |               |               |               |               |               |                          |               |               |               |               |               |               |               |               |               |               |               |               |               |               |               |               |                                           |               |               |               |               |               |               |               |               |               |               |               |               |               |               |               |               |                          |               |               |               |               |               |               |               |               |               |               |               |               |               |               |               |               |                                      |               |               |               |               |               |               |               |               |               |               |               |               |               |               |               |               |                                              |               |               |               |               |               |               |               |               |               |               |               |               |               |               |               |               |                                           |            |            |             |             |             |             |             |             |             |             |             |             |               |               |               |               |                                                 |               |               |               |               |               |               |               |               |               |               |               |               |               |               |               |               |                                              |               |               |               |               |               |               |               |               |               |               |               |               |               |               |               |               |                                             |               |               |             |             |             |             |             |             |               |               |               |               |               |               |               |               |                                            |               |               |               |               |               |               |               |               |             |             |               |               |               |               |               |               |                                                 |             |             |             |             |             |             |             |             |             |             |             |             |               |               |               |               |                                           |               |               |             |             |             |             |             |             |               |               |               |               |               |               |               |               |                          |               |               |               |               |               |               |               |               |               |               |               |               |               |               |               |               |                                      |               |               |               |               |               |               |               |               |               |               |               |               |               |               |               |               |                                              |             |             |             |             |             |             |             |             |             |             |            |            |               |               |               |               |                          |               |               |               |               |               |               |               |               |               |               |               |               |               |               |               |               |                                                 |               |               |               |               |               |               |               |               |               |               |               |               |               |               |               |               |                                              |             |             |             |             |             |             |             |             |             |             |               |               |               |               |               |               |                      |               |               |             |             |             |             |             |             |               |               |               |               |               |               |               |               |                                                 |               |               |               |               |               |               |               |               |             |             |               |               |               |               |               |               |                                        |             |             |             |             |             |             |             |             |             |             |               |               |               |               |               |               |                                           |               |               |             |             |             |             |             |             |               |               |               |               |               |               |               |               |                          |               |               |               |               |               |               |               |               |               |               |               |               |               |               |               |               |              |               |               |               |               |               |               |               |               |               |               |               |               |               |               |               |               |                                             |           |           |            |            |            |            |            |            |           |           |           |           |            |            |            |            |                          |               |               |               |               |               |               |               |               |               |               |               |               |               |               |               |               |                                                 |               |               |               |               |               |               |               |               |               |               |               |               |               |               |               |               |                                             |             |             |             |             |             |             |             |             |             |             |               |               |               |               |               |               |                      |            |            |            |            |            |            |            |            |            |            |            |            |            |              |              |              |                                                 |           |           |           |           |           |           |           |           |           |           |            |            |            |            |            |            |         |             |             |             |             |             |             |             |             |             |             |               |               |               |               |               |               |                      |           |           |           |           |           |           |           |           |           |           |           |           |            |            |            |  |
| Liver disease                                   | 235 (7.1%)            | 246 (7.4%)            | 154 (3.5%)            | 154 (3.5%)            | 154 (3.5%)            | 154 (3.5%)            | 154 (3.5%)            | 154 (3.5%)            | 267 (6.3%)            | 267 (6.3%)            | 361 (6.1%)            | 361 (6.1%)            | 998 (5.6%)             | 1,031 (5.8%)           | 1,031 (5.8%)           | 1,031 (5.8%)           |                                            |               |               |               |               |               |               |               |               |               |               |               |               |               |               |               |               |                      |               |               |               |               |               |               |               |               |               |               |               |               |               |               |               |               |                                           |               |               |               |               |               |               |               |               |               |               |               |               |               |               |               |               |                             |               |               |               |               |               |               |               |               |               |               |               |               |               |               |               |               |                            |             |             |               |               |               |               |               |               |               |               |               |               |               |               |               |               |                                      |               |               |               |               |               |               |               |               |               |               |               |               |                |                |                |                |                                              |               |               |               |               |               |               |               |               |               |               |               |               |               |               |               |               |                                            |               |               |               |               |               |               |               |               |               |               |               |               |               |               |               |               |                                              |               |               |               |               |               |               |               |               |               |               |               |               |                |                |                |                |                                           |               |               |               |               |               |               |               |               |               |               |               |               |               |               |               |               |                          |               |               |               |               |               |               |               |               |               |               |               |               |               |               |               |               |                                            |             |             |               |               |               |               |               |               |               |               |               |               |               |               |               |               |                             |               |               |               |               |               |               |               |               |               |               |               |               |               |               |               |               |                                           |               |               |               |               |               |               |               |               |               |               |               |               |               |               |               |               |                                      |               |               |               |               |               |               |               |               |               |               |               |               |               |               |               |               |                                              |               |               |               |               |               |               |               |               |               |               |               |               |               |               |               |               |                                             |               |               |               |               |               |               |               |               |               |               |               |               |               |               |               |               |                                            |               |               |               |               |               |               |               |               |               |               |               |               |               |               |               |               |                                                 |             |             |             |             |             |             |             |             |            |            |            |            |              |              |              |              |                                              |               |               |               |               |               |               |               |               |               |               |               |               |               |               |               |               |                                                 |               |               |               |               |               |               |               |               |               |               |               |               |               |               |               |               |                          |               |               |               |               |               |               |               |               |               |               |               |               |               |               |               |               |                                           |               |               |               |               |               |               |               |               |               |               |               |               |               |               |               |               |                          |               |               |               |               |               |               |               |               |               |               |               |               |               |               |               |               |                                      |               |               |               |               |               |               |               |               |               |               |               |               |               |               |               |               |                                              |               |               |               |               |               |               |               |               |               |               |               |               |               |               |               |               |                                           |            |            |             |             |             |             |             |             |             |             |             |             |               |               |               |               |                                                 |               |               |               |               |               |               |               |               |               |               |               |               |               |               |               |               |                                              |               |               |               |               |               |               |               |               |               |               |               |               |               |               |               |               |                                             |               |               |             |             |             |             |             |             |               |               |               |               |               |               |               |               |                                            |               |               |               |               |               |               |               |               |             |             |               |               |               |               |               |               |                                                 |             |             |             |             |             |             |             |             |             |             |             |             |               |               |               |               |                                           |               |               |             |             |             |             |             |             |               |               |               |               |               |               |               |               |                          |               |               |               |               |               |               |               |               |               |               |               |               |               |               |               |               |                                      |               |               |               |               |               |               |               |               |               |               |               |               |               |               |               |               |                                              |             |             |             |             |             |             |             |             |             |             |            |            |               |               |               |               |                          |               |               |               |               |               |               |               |               |               |               |               |               |               |               |               |               |                                                 |               |               |               |               |               |               |               |               |               |               |               |               |               |               |               |               |                                              |             |             |             |             |             |             |             |             |             |             |               |               |               |               |               |               |                      |               |               |             |             |             |             |             |             |               |               |               |               |               |               |               |               |                                                 |               |               |               |               |               |               |               |               |             |             |               |               |               |               |               |               |                                        |             |             |             |             |             |             |             |             |             |             |               |               |               |               |               |               |                                           |               |               |             |             |             |             |             |             |               |               |               |               |               |               |               |               |                          |               |               |               |               |               |               |               |               |               |               |               |               |               |               |               |               |              |               |               |               |               |               |               |               |               |               |               |               |               |               |               |               |               |                                             |           |           |            |            |            |            |            |            |           |           |           |           |            |            |            |            |                          |               |               |               |               |               |               |               |               |               |               |               |               |               |               |               |               |                                                 |               |               |               |               |               |               |               |               |               |               |               |               |               |               |               |               |                                             |             |             |             |             |             |             |             |             |             |             |               |               |               |               |               |               |                      |            |            |            |            |            |            |            |            |            |            |            |            |            |              |              |              |                                                 |           |           |           |           |           |           |           |           |           |           |            |            |            |            |            |            |         |             |             |             |             |             |             |             |             |             |             |               |               |               |               |               |               |                      |           |           |           |           |           |           |           |           |           |           |           |           |            |            |            |  |
| Malignancy (excluding non-melanoma skin cancer) | 50 (1.5%)             | 46 (1.4%)             | 21 (0.5%)             | 21 (0.5%)             | 21 (0.5%)             | 21 (0.5%)             | 21 (0.5%)             | 21 (0.5%)             | 62 (1.4%)             | 62 (1.4%)             | 216 (3.7%)            | 216 (3.7%)            | 200 (1.1%)             | 200 (1.1%)             | 200 (1.1%)             | 200 (1.1%)             |                                            |               |               |               |               |               |               |               |               |               |               |               |               |               |               |               |               |                      |               |               |               |               |               |               |               |               |               |               |               |               |               |               |               |               |                                           |               |               |               |               |               |               |               |               |               |               |               |               |               |               |               |               |                             |               |               |               |               |               |               |               |               |               |               |               |               |               |               |               |               |                            |             |             |               |               |               |               |               |               |               |               |               |               |               |               |               |               |                                      |               |               |               |               |               |               |               |               |               |               |               |               |                |                |                |                |                                              |               |               |               |               |               |               |               |               |               |               |               |               |               |               |               |               |                                            |               |               |               |               |               |               |               |               |               |               |               |               |               |               |               |               |                                              |               |               |               |               |               |               |               |               |               |               |               |               |                |                |                |                |                                           |               |               |               |               |               |               |               |               |               |               |               |               |               |               |               |               |                          |               |               |               |               |               |               |               |               |               |               |               |               |               |               |               |               |                                            |             |             |               |               |               |               |               |               |               |               |               |               |               |               |               |               |                             |               |               |               |               |               |               |               |               |               |               |               |               |               |               |               |               |                                           |               |               |               |               |               |               |               |               |               |               |               |               |               |               |               |               |                                      |               |               |               |               |               |               |               |               |               |               |               |               |               |               |               |               |                                              |               |               |               |               |               |               |               |               |               |               |               |               |               |               |               |               |                                             |               |               |               |               |               |               |               |               |               |               |               |               |               |               |               |               |                                            |               |               |               |               |               |               |               |               |               |               |               |               |               |               |               |               |                                                 |             |             |             |             |             |             |             |             |            |            |            |            |              |              |              |              |                                              |               |               |               |               |               |               |               |               |               |               |               |               |               |               |               |               |                                                 |               |               |               |               |               |               |               |               |               |               |               |               |               |               |               |               |                          |               |               |               |               |               |               |               |               |               |               |               |               |               |               |               |               |                                           |               |               |               |               |               |               |               |               |               |               |               |               |               |               |               |               |                          |               |               |               |               |               |               |               |               |               |               |               |               |               |               |               |               |                                      |               |               |               |               |               |               |               |               |               |               |               |               |               |               |               |               |                                              |               |               |               |               |               |               |               |               |               |               |               |               |               |               |               |               |                                           |            |            |             |             |             |             |             |             |             |             |             |             |               |               |               |               |                                                 |               |               |               |               |               |               |               |               |               |               |               |               |               |               |               |               |                                              |               |               |               |               |               |               |               |               |               |               |               |               |               |               |               |               |                                             |               |               |             |             |             |             |             |             |               |               |               |               |               |               |               |               |                                            |               |               |               |               |               |               |               |               |             |             |               |               |               |               |               |               |                                                 |             |             |             |             |             |             |             |             |             |             |             |             |               |               |               |               |                                           |               |               |             |             |             |             |             |             |               |               |               |               |               |               |               |               |                          |               |               |               |               |               |               |               |               |               |               |               |               |               |               |               |               |                                      |               |               |               |               |               |               |               |               |               |               |               |               |               |               |               |               |                                              |             |             |             |             |             |             |             |             |             |             |            |            |               |               |               |               |                          |               |               |               |               |               |               |               |               |               |               |               |               |               |               |               |               |                                                 |               |               |               |               |               |               |               |               |               |               |               |               |               |               |               |               |                                              |             |             |             |             |             |             |             |             |             |             |               |               |               |               |               |               |                      |               |               |             |             |             |             |             |             |               |               |               |               |               |               |               |               |                                                 |               |               |               |               |               |               |               |               |             |             |               |               |               |               |               |               |                                        |             |             |             |             |             |             |             |             |             |             |               |               |               |               |               |               |                                           |               |               |             |             |             |             |             |             |               |               |               |               |               |               |               |               |                          |               |               |               |               |               |               |               |               |               |               |               |               |               |               |               |               |              |               |               |               |               |               |               |               |               |               |               |               |               |               |               |               |               |                                             |           |           |            |            |            |            |            |            |           |           |           |           |            |            |            |            |                          |               |               |               |               |               |               |               |               |               |               |               |               |               |               |               |               |                                                 |               |               |               |               |               |               |               |               |               |               |               |               |               |               |               |               |                                             |             |             |             |             |             |             |             |             |             |             |               |               |               |               |               |               |                      |            |            |            |            |            |            |            |            |            |            |            |            |            |              |              |              |                                                 |           |           |           |           |           |           |           |           |           |           |            |            |            |            |            |            |         |             |             |             |             |             |             |             |             |             |             |               |               |               |               |               |               |                      |           |           |           |           |           |           |           |           |           |           |           |           |            |            |            |  |
| Obesity                                         | 859 (25.9%)           | 843 (25.4%)           | 565 (13.0%)           | 580 (13.3%)           | 580 (13.3%)           | 580 (13.3%)           | 580 (13.3%)           | 580 (13.3%)           | 859 (20.2%)           | 859 (20.2%)           | 1,267 (21.3%)         | 1,267 (21.3%)         | 3,549 (19.9%)          | 3,549 (19.9%)          | 3,549 (19.9%)          | 3,549 (19.9%)          |                                            |               |               |               |               |               |               |               |               |               |               |               |               |               |               |               |               |                      |               |               |               |               |               |               |               |               |               |               |               |               |               |               |               |               |                                           |               |               |               |               |               |               |               |               |               |               |               |               |               |               |               |               |                             |               |               |               |               |               |               |               |               |               |               |               |               |               |               |               |               |                            |             |             |               |               |               |               |               |               |               |               |               |               |               |               |               |               |                                      |               |               |               |               |               |               |               |               |               |               |               |               |                |                |                |                |                                              |               |               |               |               |               |               |               |               |               |               |               |               |               |               |               |               |                                            |               |               |               |               |               |               |               |               |               |               |               |               |               |               |               |               |                                              |               |               |               |               |               |               |               |               |               |               |               |               |                |                |                |                |                                           |               |               |               |               |               |               |               |               |               |               |               |               |               |               |               |               |                          |               |               |               |               |               |               |               |               |               |               |               |               |               |               |               |               |                                            |             |             |               |               |               |               |               |               |               |               |               |               |               |               |               |               |                             |               |               |               |               |               |               |               |               |               |               |               |               |               |               |               |               |                                           |               |               |               |               |               |               |               |               |               |               |               |               |               |               |               |               |                                      |               |               |               |               |               |               |               |               |               |               |               |               |               |               |               |               |                                              |               |               |               |               |               |               |               |               |               |               |               |               |               |               |               |               |                                             |               |               |               |               |               |               |               |               |               |               |               |               |               |               |               |               |                                            |               |               |               |               |               |               |               |               |               |               |               |               |               |               |               |               |                                                 |             |             |             |             |             |             |             |             |            |            |            |            |              |              |              |              |                                              |               |               |               |               |               |               |               |               |               |               |               |               |               |               |               |               |                                                 |               |               |               |               |               |               |               |               |               |               |               |               |               |               |               |               |                          |               |               |               |               |               |               |               |               |               |               |               |               |               |               |               |               |                                           |               |               |               |               |               |               |               |               |               |               |               |               |               |               |               |               |                          |               |               |               |               |               |               |               |               |               |               |               |               |               |               |               |               |                                      |               |               |               |               |               |               |               |               |               |               |               |               |               |               |               |               |                                              |               |               |               |               |               |               |               |               |               |               |               |               |               |               |               |               |                                           |            |            |             |             |             |             |             |             |             |             |             |             |               |               |               |               |                                                 |               |               |               |               |               |               |               |               |               |               |               |               |               |               |               |               |                                              |               |               |               |               |               |               |               |               |               |               |               |               |               |               |               |               |                                             |               |               |             |             |             |             |             |             |               |               |               |               |               |               |               |               |                                            |               |               |               |               |               |               |               |               |             |             |               |               |               |               |               |               |                                                 |             |             |             |             |             |             |             |             |             |             |             |             |               |               |               |               |                                           |               |               |             |             |             |             |             |             |               |               |               |               |               |               |               |               |                          |               |               |               |               |               |               |               |               |               |               |               |               |               |               |               |               |                                      |               |               |               |               |               |               |               |               |               |               |               |               |               |               |               |               |                                              |             |             |             |             |             |             |             |             |             |             |            |            |               |               |               |               |                          |               |               |               |               |               |               |               |               |               |               |               |               |               |               |               |               |                                                 |               |               |               |               |               |               |               |               |               |               |               |               |               |               |               |               |                                              |             |             |             |             |             |             |             |             |             |             |               |               |               |               |               |               |                      |               |               |             |             |             |             |             |             |               |               |               |               |               |               |               |               |                                                 |               |               |               |               |               |               |               |               |             |             |               |               |               |               |               |               |                                        |             |             |             |             |             |             |             |             |             |             |               |               |               |               |               |               |                                           |               |               |             |             |             |             |             |             |               |               |               |               |               |               |               |               |                          |               |               |               |               |               |               |               |               |               |               |               |               |               |               |               |               |              |               |               |               |               |               |               |               |               |               |               |               |               |               |               |               |               |                                             |           |           |            |            |            |            |            |            |           |           |           |           |            |            |            |            |                          |               |               |               |               |               |               |               |               |               |               |               |               |               |               |               |               |                                                 |               |               |               |               |               |               |               |               |               |               |               |               |               |               |               |               |                                             |             |             |             |             |             |             |             |             |             |             |               |               |               |               |               |               |                      |            |            |            |            |            |            |            |            |            |            |            |            |            |              |              |              |                                                 |           |           |           |           |           |           |           |           |           |           |            |            |            |            |            |            |         |             |             |             |             |             |             |             |             |             |             |               |               |               |               |               |               |                      |           |           |           |           |           |           |           |           |           |           |           |           |            |            |            |  |
| Peptic ulcer disease                            | 52 (1.6%)             | 46 (1.4%)             | 39 (0.9%)             | 39 (0.9%)             | 39 (0.9%)             | 39 (0.9%)             | 39 (0.9%)             | 39 (0.9%)             | 39 (0.9%)             | 39 (0.9%)             | 41 (0.7%)             | 41 (0.7%)             | 160 (0.9%)             | 154 (0.9%)             | 154 (0.9%)             |                        |                                            |               |               |               |               |               |               |               |               |               |               |               |               |               |               |               |               |                      |               |               |               |               |               |               |               |               |               |               |               |               |               |               |               |               |                                           |               |               |               |               |               |               |               |               |               |               |               |               |               |               |               |               |                             |               |               |               |               |               |               |               |               |               |               |               |               |               |               |               |               |                            |             |             |               |               |               |               |               |               |               |               |               |               |               |               |               |               |                                      |               |               |               |               |               |               |               |               |               |               |               |               |                |                |                |                |                                              |               |               |               |               |               |               |               |               |               |               |               |               |               |               |               |               |                                            |               |               |               |               |               |               |               |               |               |               |               |               |               |               |               |               |                                              |               |               |               |               |               |               |               |               |               |               |               |               |                |                |                |                |                                           |               |               |               |               |               |               |               |               |               |               |               |               |               |               |               |               |                          |               |               |               |               |               |               |               |               |               |               |               |               |               |               |               |               |                                            |             |             |               |               |               |               |               |               |               |               |               |               |               |               |               |               |                             |               |               |               |               |               |               |               |               |               |               |               |               |               |               |               |               |                                           |               |               |               |               |               |               |               |               |               |               |               |               |               |               |               |               |                                      |               |               |               |               |               |               |               |               |               |               |               |               |               |               |               |               |                                              |               |               |               |               |               |               |               |               |               |               |               |               |               |               |               |               |                                             |               |               |               |               |               |               |               |               |               |               |               |               |               |               |               |               |                                            |               |               |               |               |               |               |               |               |               |               |               |               |               |               |               |               |                                                 |             |             |             |             |             |             |             |             |            |            |            |            |              |              |              |              |                                              |               |               |               |               |               |               |               |               |               |               |               |               |               |               |               |               |                                                 |               |               |               |               |               |               |               |               |               |               |               |               |               |               |               |               |                          |               |               |               |               |               |               |               |               |               |               |               |               |               |               |               |               |                                           |               |               |               |               |               |               |               |               |               |               |               |               |               |               |               |               |                          |               |               |               |               |               |               |               |               |               |               |               |               |               |               |               |               |                                      |               |               |               |               |               |               |               |               |               |               |               |               |               |               |               |               |                                              |               |               |               |               |               |               |               |               |               |               |               |               |               |               |               |               |                                           |            |            |             |             |             |             |             |             |             |             |             |             |               |               |               |               |                                                 |               |               |               |               |               |               |               |               |               |               |               |               |               |               |               |               |                                              |               |               |               |               |               |               |               |               |               |               |               |               |               |               |               |               |                                             |               |               |             |             |             |             |             |             |               |               |               |               |               |               |               |               |                                            |               |               |               |               |               |               |               |               |             |             |               |               |               |               |               |               |                                                 |             |             |             |             |             |             |             |             |             |             |             |             |               |               |               |               |                                           |               |               |             |             |             |             |             |             |               |               |               |               |               |               |               |               |                          |               |               |               |               |               |               |               |               |               |               |               |               |               |               |               |               |                                      |               |               |               |               |               |               |               |               |               |               |               |               |               |               |               |               |                                              |             |             |             |             |             |             |             |             |             |             |            |            |               |               |               |               |                          |               |               |               |               |               |               |               |               |               |               |               |               |               |               |               |               |                                                 |               |               |               |               |               |               |               |               |               |               |               |               |               |               |               |               |                                              |             |             |             |             |             |             |             |             |             |             |               |               |               |               |               |               |                      |               |               |             |             |             |             |             |             |               |               |               |               |               |               |               |               |                                                 |               |               |               |               |               |               |               |               |             |             |               |               |               |               |               |               |                                        |             |             |             |             |             |             |             |             |             |             |               |               |               |               |               |               |                                           |               |               |             |             |             |             |             |             |               |               |               |               |               |               |               |               |                          |               |               |               |               |               |               |               |               |               |               |               |               |               |               |               |               |              |               |               |               |               |               |               |               |               |               |               |               |               |               |               |               |               |                                             |           |           |            |            |            |            |            |            |           |           |           |           |            |            |            |            |                          |               |               |               |               |               |               |               |               |               |               |               |               |               |               |               |               |                                                 |               |               |               |               |               |               |               |               |               |               |               |               |               |               |               |               |                                             |             |             |             |             |             |             |             |             |             |             |               |               |               |               |               |               |                      |            |            |            |            |            |            |            |            |            |            |            |            |            |              |              |              |                                                 |           |           |           |           |           |           |           |           |           |           |            |            |            |            |            |            |         |             |             |             |             |             |             |             |             |             |             |               |               |               |               |               |               |                      |           |           |           |           |           |           |           |           |           |           |           |           |            |            |            |  |



**Online Supplement -- Table 3.** Use of index therapy among matched patients receiving apixaban and warfarin as outpatient therapy for VTE, overall and within study database, by index drug\*

|                                                                | Humana                |                       | MarketScan            |                       | Optum                 |                       | PharMetrics           |                       | Total Population       |                        |
|----------------------------------------------------------------|-----------------------|-----------------------|-----------------------|-----------------------|-----------------------|-----------------------|-----------------------|-----------------------|------------------------|------------------------|
|                                                                | Apixaban<br>(n=3,318) | Warfarin<br>(n=3,318) | Apixaban<br>(n=4,356) | Warfarin<br>(n=4,356) | Apixaban<br>(n=4,243) | Warfarin<br>(n=4,243) | Apixaban<br>(n=5,961) | Warfarin<br>(n=5,961) | Apixaban<br>(n=17,878) | Warfarin<br>(n=17,878) |
| <b>Index Therapy</b>                                           |                       |                       |                       |                       |                       |                       |                       |                       |                        |                        |
| Number of prescriptions, mean (SD)                             | 3.5 (2.3)             | 4.7 (4.1)             | 5.3 (4.2)             | 5.8 (4.7)             | 3.6 (2.2)             | 5.0 (4.7)             | 4.1 (2.1)             | 4.8 (3.1)             | 4.2 (2.9)              | 5.1 (4.2)              |
| Number of therapy days, mean (SD)                              | 109.2 (59.0)          | 134.9 (56.8)          | 119.6 (62.4)          | 127.2 (60.9)          | 112.9 (68.0)          | 151.9 (99.3)          | 120.0 (55.2)          | 131.3 (57.8)          | 116.2 (61.0)           | 135.8 (71.0)           |
| Dose of index therapy, n (%)                                   |                       |                       |                       |                       |                       |                       |                       |                       |                        |                        |
| <b>First prescription</b>                                      |                       |                       |                       |                       |                       |                       |                       |                       |                        |                        |
| Apixaban                                                       | 308 (9.3)             | ---                   | 300 (6.9)             | ---                   | 379 (8.9)             | ---                   | 292 (4.9)             | ---                   | 1,279 (7.2)            | ---                    |
| 5 mg                                                           | 3,010 (90.7)          | ---                   | 4,056 (93.1)          | ---                   | 3,864 (91.1)          | ---                   | 5,669 (95.1)          | ---                   | 16,599 (92.8)          | ---                    |
| <b>Second &amp; subsequent prescriptions</b>                   |                       |                       |                       |                       |                       |                       |                       |                       |                        |                        |
| Apixaban                                                       | 731 (22.0)            | ---                   | 860 (19.7)            | ---                   | 923 (21.8)            | ---                   | 775 (13.0)            | ---                   | 3,289 (18.4)           | ---                    |
| None                                                           | 283 (8.5)             | ---                   | 287 (6.6)             | ---                   | 374 (8.8)             | ---                   | 332 (5.6)             | ---                   | 1,276 (7.1)            | ---                    |
| 2.5 mg                                                         | 2,359 (71.1)          | ---                   | 3,284 (75.4)          | ---                   | 3,045 (71.8)          | ---                   | 4,980 (83.5)          | ---                   | 13,668 (76.5)          | ---                    |
| 5 mg                                                           |                       |                       |                       |                       |                       |                       |                       |                       |                        |                        |
| <b>Switch from index therapy to another OAC, n (%)</b>         |                       |                       |                       |                       |                       |                       |                       |                       |                        |                        |
| Apixaban                                                       | 0 (0.0)               | 126 (3.8)             | 0 (0.0)               | 165 (3.8)             | 0 (0.0)               | 160 (3.8)             | 0 (0.0)               | 255 (4.3)             | 0 (0.0)                | 706 (3.9)              |
| Dabigatran                                                     | 0 (0.0)               | 2 (0.1)               | 1 (0.0)               | 0 (0.0)               | 0 (0.0)               | 0 (0.0)               | 0 (0.0)               | 0 (0.0)               | 1 (0.0)                | 2 (0.0)                |
| Edoxaban                                                       | 0 (0.0)               | 0 (0.0)               | 0 (0.0)               | 0 (0.0)               | 0 (0.0)               | 0 (0.0)               | 0 (0.0)               | 0 (0.0)               | 0 (0.0)                | 0 (0.0)                |
| Rivaroxaban                                                    | 5 (0.2)               | 2 (0.1)               | 6 (0.1)               | 4 (0.1)               | 4 (0.1)               | 3 (0.1)               | 0 (0.0)               | 0 (0.0)               | 15 (0.1)               | 9 (0.1)                |
| Warfarin                                                       | 87 (2.6)              | 0 (0.0)               | 83 (1.9)              | 0 (0.0)               | 110 (2.6)             | 0 (0.0)               | 152 (2.5)             | 0 (0.0)               | 432 (2.4)              | 0 (0.0)                |
| <b>Use of PAC, n (%)</b>                                       |                       |                       |                       |                       |                       |                       |                       |                       |                        |                        |
| <b>Between index encounter and initiation of index therapy</b> |                       |                       |                       |                       |                       |                       |                       |                       |                        |                        |
| Unfractionated heparin                                         | 1 (0.0)               | 2 (0.1)               | 1 (0.0)               | 3 (0.1)               | 0 (0.0)               | 3 (0.1)               | 0 (0.0)               | 0 (0.0)               | 2 (0.0)                | 8 (0.0)                |
| Low molecular weight heparin                                   |                       |                       |                       |                       |                       |                       |                       |                       |                        |                        |
| Dalteparin                                                     | 0 (0.0)               | 0 (0.0)               | 0 (0.0)               | 0 (0.0)               | 0 (0.0)               | 1 (0.0)               | 0 (0.0)               | 2 (0.0)               | 0 (0.0)                | 3 (0.0)                |
| Enoxaparin                                                     | 40 (1.2)              | 1,201 (36.2)          | 84 (1.9)              | 2,463 (56.5)          | 105 (2.5)             | 2,644 (62.3)          | 147 (2.5)             | 4,179 (70.1)          | 376 (2.1)              | 10,487 (58.7)          |
| Tinzaparin                                                     | 0 (0.0)               | 0 (0.0)               | 0 (0.0)               | 0 (0.0)               | 0 (0.0)               | 0 (0.0)               | 0 (0.0)               | 0 (0.0)               | 0 (0.0)                | 0 (0.0)                |
| Fondaparinux                                                   | 0 (0.0)               | 8 (0.2)               | 1 (0.0)               | 25 (0.6)              | 2 (0.0)               | 14 (0.3)              | 2 (0.0)               | 37 (0.6)              | 5 (0.0)                | 84 (0.5)               |
| <b>Subsequently</b>                                            |                       |                       |                       |                       |                       |                       |                       |                       |                        |                        |
| Unfractionated heparin                                         | 8 (0.2)               | 10 (0.3)              | 0 (0.0)               | 6 (0.1)               | 2 (0.0)               | 9 (0.2)               | 0 (0.0)               | 0 (0.0)               | 10 (0.1)               | 25 (0.1)               |
| Low molecular weight heparin                                   |                       |                       |                       |                       |                       |                       |                       |                       |                        |                        |
| Dalteparin                                                     | 1 (0.0)               | 1 (0.0)               | 1 (0.0)               | 1 (0.0)               | 0 (0.0)               | 1 (0.0)               | 0 (0.0)               | 3 (0.1)               | 2 (0.0)                | 6 (0.0)                |
| Enoxaparin                                                     | 77 (2.3)              | 1,360 (41.0)          | 118 (2.7)             | 2,620 (60.1)          | 120 (2.8)             | 2,729 (64.3)          | 233 (3.9)             | 4,353 (73.0)          | 548 (3.1)              | 11,062 (61.9)          |
| Tinzaparin                                                     | 0 (0.0)               | 0 (0.0)               | 0 (0.0)               | 0 (0.0)               | 0 (0.0)               | 0 (0.0)               | 0 (0.0)               | 0 (0.0)               | 0 (0.0)                | 0 (0.0)                |
| Fondaparinux                                                   | 2 (0.1)               | 12 (0.4)              | 0 (0.0)               | 37 (0.8)              | 5 (0.1)               | 22 (0.5)              | 10 (0.2)              | 51 (0.9)              | 17 (0.1)               | 122 (0.7)              |
| Days of follow-up, mean (SD)                                   | 129.4 (61.3)          | 145.8 (55.0)          | 124.5 (63.2)          | 135.4 (60.9)          | 127.5 (61.4)          | 143.6 (55.9)          | 174.5 (22.9)          | 173.3 (28.1)          | 142.8 (56.9)           | 151.9 (52.1)           |

OAC: Oral anticoagulant; PAC: Parenteral anticoagulant

\*Use during 6-month follow-up period

**Online Supplement -- Table 4a.** Risks and hazard ratios for bleeding events among patients receiving apixaban and warfarin as outpatient therapy for VTE -- matched-samples analysis

|                         | No. Patients | No. Events | % Evented | Risk per 100 PY | HR   | 95% CI      | p-value |
|-------------------------|--------------|------------|-----------|-----------------|------|-------------|---------|
| <b>Total Population</b> |              |            |           |                 |      |             |         |
| Major Bleeding Event    |              |            |           |                 |      |             |         |
| All                     |              |            |           |                 |      |             |         |
| Apixaban                | 17,878       | 295        | 1.7%      | 4.2             | 0.75 | 0.64 - 0.87 | <0.001  |
| Warfarin                | 17,878       | 412        | 2.3%      | 5.5             | --   | --          | --      |
| Gastrointestinal        |              |            |           |                 |      |             |         |
| Apixaban                | 17,878       | 111        | 0.6%      | 1.6             | 0.72 | 0.57 - 0.92 | 0.009   |
| Warfarin                | 17,878       | 160        | 0.9%      | 2.2             | --   | --          | --      |
| Intracranial            |              |            |           |                 |      |             |         |
| Apixaban                | 17,878       | 24         | 0.1%      | 0.3             | 0.97 | 0.56 - 1.69 | 0.920   |
| Warfarin                | 17,878       | 26         | 0.1%      | 0.3             | --   | --          | --      |
| Other                   |              |            |           |                 |      |             |         |
| Apixaban                | 17,878       | 160        | 0.9%      | 2.3             | 0.74 | 0.60 - 0.90 | 0.003   |
| Warfarin                | 17,878       | 226        | 1.3%      | 3.0             | --   | --          | --      |
| CRNM Bleeding Event     |              |            |           |                 |      |             |         |
| All                     |              |            |           |                 |      |             |         |
| Apixaban                | 17,878       | 1,257      | 7.0%      | 18.0            | 0.77 | 0.71 - 0.83 | <0.001  |
| Warfarin                | 17,878       | 1,688      | 9.4%      | 22.7            | --   | --          | --      |
| Gastrointestinal        |              |            |           |                 |      |             |         |
| Apixaban                | 17,878       | 385        | 2.2%      | 5.5             | 0.88 | 0.76 - 1.00 | 0.053   |
| Warfarin                | 17,878       | 460        | 2.6%      | 6.2             | --   | --          | --      |
| Other                   |              |            |           |                 |      |             |         |
| Apixaban                | 17,878       | 874        | 4.9%      | 12.5            | 0.73 | 0.67 - 0.79 | <0.001  |
| Warfarin                | 17,878       | 1,238      | 6.9%      | 16.7            | --   | --          | --      |
| <b>Humana</b>           |              |            |           |                 |      |             |         |
| Major Bleeding Event    |              |            |           |                 |      |             |         |
| All                     |              |            |           |                 |      |             |         |
| Apixaban                | 3,318        | 99         | 3.0%      | 8.4             | 0.77 | 0.60 - 1.00 | 0.049   |
| Warfarin                | 3,318        | 140        | 4.2%      | 10.6            | --   | --          | --      |
| Gastrointestinal        |              |            |           |                 |      |             |         |
| Apixaban                | 3,318        | 43         | 1.3%      | 3.7             | 0.74 | 0.50 - 1.09 | 0.123   |
| Warfarin                | 3,318        | 64         | 1.9%      | 4.8             | --   | --          | --      |
| Intracranial            |              |            |           |                 |      |             |         |
| Apixaban                | 3,318        | 6          | 0.2%      | 0.5             | 0.96 | 0.32 - 2.85 | 0.935   |
| Warfarin                | 3,318        | 7          | 0.2%      | 0.5             | --   | --          | --      |
| Other                   |              |            |           |                 |      |             |         |
| Apixaban                | 3,318        | 50         | 1.5%      | 4.3             | 0.79 | 0.55 - 1.14 | 0.207   |
| Warfarin                | 3,318        | 69         | 2.1%      | 5.2             | --   | --          | --      |
| CRNM Bleeding Event     |              |            |           |                 |      |             |         |
| All                     |              |            |           |                 |      |             |         |
| Apixaban                | 3,318        | 233        | 7.0%      | 19.8            | 0.79 | 0.67 - 0.94 | 0.007   |
| Warfarin                | 3,318        | 316        | 9.5%      | 23.9            | --   | --          | --      |
| Gastrointestinal        |              |            |           |                 |      |             |         |
| Apixaban                | 3,318        | 77         | 2.3%      | 6.5             | 0.76 | 0.57 - 1.01 | 0.062   |
| Warfarin                | 3,318        | 110        | 3.3%      | 8.3             | --   | --          | --      |
| Other                   |              |            |           |                 |      |             |         |
| Apixaban                | 3,318        | 156        | 4.7%      | 13.3            | 0.81 | 0.66 - 0.99 | 0.042   |
| Warfarin                | 3,318        | 209        | 6.3%      | 15.8            | --   | --          | --      |

**Online Supplement -- Table 4a.** Risks and hazard ratios for bleeding events among patients receiving apixaban and warfarin as outpatient therapy for VTE -- matched-samples analysis

|                      | No.<br>Patients | No.<br>Events | %<br>Evented | Risk per<br>100 PY | HR   | 95% CI      | p-value |
|----------------------|-----------------|---------------|--------------|--------------------|------|-------------|---------|
| <b>MarketScan</b>    |                 |               |              |                    |      |             |         |
| Major Bleeding Event |                 |               |              |                    |      |             |         |
| All                  |                 |               |              |                    |      |             |         |
| Apixaban             | 4,356           | 45            | 1.0%         | 3.0                | 0.94 | 0.63 - 1.40 | 0.760   |
| Warfarin             | 4,356           | 51            | 1.2%         | 3.2                | --   | --          | --      |
| Gastrointestinal     |                 |               |              |                    |      |             |         |
| Apixaban             | 4,356           | 19            | 0.4%         | 1.3                | 1.20 | 0.62 - 2.30 | 0.590   |
| Warfarin             | 4,356           | 17            | 0.4%         | 1.1                | --   | --          | --      |
| Intracranial         |                 |               |              |                    |      |             |         |
| Apixaban             | 4,356           | 3             | 0.1%         | 0.2                | 0.65 | 0.15 - 2.70 | 0.549   |
| Warfarin             | 4,356           | 5             | 0.1%         | 0.3                | --   | --          | --      |
| Other                |                 |               |              |                    |      |             |         |
| Apixaban             | 4,356           | 23            | 0.5%         | 1.5                | 0.84 | 0.49 - 1.45 | 0.534   |
| Warfarin             | 4,356           | 29            | 0.7%         | 1.8                | --   | --          | --      |
| CRNM Bleeding Event  |                 |               |              |                    |      |             |         |
| All                  |                 |               |              |                    |      |             |         |
| Apixaban             | 4,356           | 310           | 7.1%         | 20.9               | 0.76 | 0.66 - 0.88 | <0.001  |
| Warfarin             | 4,356           | 424           | 9.7%         | 26.3               | --   | --          | --      |
| Gastrointestinal     |                 |               |              |                    |      |             |         |
| Apixaban             | 4,356           | 96            | 2.2%         | 6.5                | 0.93 | 0.71 - 1.23 | 0.617   |
| Warfarin             | 4,356           | 109           | 2.5%         | 6.8                | --   | --          | --      |
| Other                |                 |               |              |                    |      |             |         |
| Apixaban             | 4,356           | 214           | 4.9%         | 14.4               | 0.71 | 0.59 - 0.84 | <0.001  |
| Warfarin             | 4,356           | 317           | 7.3%         | 19.6               | --   | --          | --      |
| <b>Optum</b>         |                 |               |              |                    |      |             |         |
| Major Bleeding Event |                 |               |              |                    |      |             |         |
| All                  |                 |               |              |                    |      |             |         |
| Apixaban             | 4,243           | 92            | 2.2%         | 6.2                | 0.80 | 0.61 - 1.05 | 0.102   |
| Warfarin             | 4,243           | 124           | 2.9%         | 7.4                | --   | --          | --      |
| Gastrointestinal     |                 |               |              |                    |      |             |         |
| Apixaban             | 4,243           | 35            | 0.8%         | 2.4                | 0.71 | 0.47 - 1.10 | 0.124   |
| Warfarin             | 4,243           | 53            | 1.2%         | 3.2                | --   | --          | --      |
| Intracranial         |                 |               |              |                    |      |             |         |
| Apixaban             | 4,243           | 7             | 0.2%         | 0.5                | 1.30 | 0.44 - 3.88 | 0.636   |
| Warfarin             | 4,243           | 6             | 0.1%         | 0.4                | --   | --          | --      |
| Other                |                 |               |              |                    |      |             |         |
| Apixaban             | 4,243           | 50            | 1.2%         | 3.4                | 0.83 | 0.57 - 1.19 | 0.308   |
| Warfarin             | 4,243           | 65            | 1.5%         | 3.9                | --   | --          | --      |
| CRNM Bleeding Event  |                 |               |              |                    |      |             |         |
| All                  |                 |               |              |                    |      |             |         |
| Apixaban             | 4,243           | 264           | 6.2%         | 17.8               | 0.80 | 0.68 - 0.94 | 0.005   |
| Warfarin             | 4,243           | 358           | 8.4%         | 21.5               | --   | --          | --      |
| Gastrointestinal     |                 |               |              |                    |      |             |         |
| Apixaban             | 4,243           | 91            | 2.1%         | 6.1                | 0.97 | 0.73 - 1.29 | 0.838   |
| Warfarin             | 4,243           | 103           | 2.4%         | 6.2                | --   | --          | --      |
| Other                |                 |               |              |                    |      |             |         |
| Apixaban             | 4,243           | 174           | 4.1%         | 11.7               | 0.73 | 0.61 - 0.89 | 0.002   |
| Warfarin             | 4,243           | 256           | 6.0%         | 15.3               | --   | --          | --      |

**Online Supplement -- Table 4a.** Risks and hazard ratios for bleeding events among patients receiving apixaban and warfarin as outpatient therapy for VTE -- matched-samples analysis

|                      | No.<br>Patients | No.<br>Events | %<br>Evented | Risk per<br>100 PY | HR   | 95% CI      | p-value |
|----------------------|-----------------|---------------|--------------|--------------------|------|-------------|---------|
| <b>PharMetrics</b>   |                 |               |              |                    |      |             |         |
| Major Bleeding Event |                 |               |              |                    |      |             |         |
| All                  |                 |               |              |                    |      |             |         |
| Apixaban             | 5,961           | 59            | 1.0%         | 2.1                | 0.60 | 0.44 - 0.83 | 0.002   |
| Warfarin             | 5,961           | 97            | 1.6%         | 3.4                | --   | --          | --      |
| Gastrointestinal     |                 |               |              |                    |      |             |         |
| Apixaban             | 5,961           | 14            | 0.2%         | 0.5                | 0.53 | 0.28 - 1.02 | 0.059   |
| Warfarin             | 5,961           | 26            | 0.4%         | 0.9                | --   | --          | --      |
| Intracranial         |                 |               |              |                    |      |             |         |
| Apixaban             | 5,961           | 8             | 0.1%         | 0.3                | 0.99 | 0.37 - 2.64 | 0.987   |
| Warfarin             | 5,961           | 8             | 0.1%         | 0.3                | --   | --          | --      |
| Other                |                 |               |              |                    |      |             |         |
| Apixaban             | 5,961           | 37            | 0.6%         | 1.3                | 0.58 | 0.39 - 0.87 | 0.009   |
| Warfarin             | 5,961           | 63            | 1.1%         | 2.2                | --   | --          | --      |
| CRNM Bleeding Event  |                 |               |              |                    |      |             |         |
| All                  |                 |               |              |                    |      |             |         |
| Apixaban             | 5,961           | 450           | 7.5%         | 15.8               | 0.75 | 0.66 - 0.84 | <0.001  |
| Warfarin             | 5,961           | 590           | 9.9%         | 20.9               | --   | --          | --      |
| Gastrointestinal     |                 |               |              |                    |      |             |         |
| Apixaban             | 5,961           | 121           | 2.0%         | 4.2                | 0.87 | 0.68 - 1.11 | 0.267   |
| Warfarin             | 5,961           | 138           | 2.3%         | 4.9                | --   | --          | --      |
| Other                |                 |               |              |                    |      |             |         |
| Apixaban             | 5,961           | 330           | 5.5%         | 11.6               | 0.71 | 0.62 - 0.82 | <0.001  |
| Warfarin             | 5,961           | 456           | 7.6%         | 16.1               | --   | --          | --      |

CRNM: clinically relevant non-major; VTE: venous thromboembolism



**Online Supplement -- Table 4b.** Risks and hazard ratios for bleeding events among patients receiving apixaban and warfarin as outpatient therapy for VTE -- unmatched-samples analysis with multivariable Cox proportional hazards models

|                         | No.<br>Patients | No.<br>Events | %<br>Evented | Risk per<br>100 PY | HR   | 95% CI      | p-value |
|-------------------------|-----------------|---------------|--------------|--------------------|------|-------------|---------|
| <b>Total Population</b> |                 |               |              |                    |      |             |         |
| Major Bleeding Event    |                 |               |              |                    |      |             |         |
| All                     |                 |               |              |                    |      |             |         |
| Apixaban                | 20,561          | 320           | 1.6%         | 4.0                | 0.71 | 0.62 - 0.81 | <0.001  |
| Warfarin                | 35,080          | 953           | 2.7%         | 6.6                | --   | --          | --      |
| Gastrointestinal        |                 |               |              |                    |      |             |         |
| Apixaban                | 20,561          | 118           | 0.6%         | 1.5                | 0.72 | 0.58 - 0.90 | 0.004   |
| Warfarin                | 35,080          | 337           | 1.0%         | 2.3                | --   | --          | --      |
| Intracranial            |                 |               |              |                    |      |             |         |
| Apixaban                | 20,561          | 28            | 0.1%         | 0.3                | 0.71 | 0.46 - 1.10 | 0.125   |
| Warfarin                | 35,080          | 85            | 0.2%         | 0.6                | --   | --          | --      |
| Other                   |                 |               |              |                    |      |             |         |
| Apixaban                | 20,561          | 174           | 0.8%         | 2.2                | 0.70 | 0.59 - 0.84 | <0.001  |
| Warfarin                | 35,080          | 532           | 1.5%         | 3.7                | --   | --          | --      |
| CRNM Bleeding Event     |                 |               |              |                    |      |             |         |
| All                     |                 |               |              |                    |      |             |         |
| Apixaban                | 20,561          | 1,452         | 7.1%         | 18.1               | 0.77 | 0.72 - 0.82 | <0.001  |
| Warfarin                | 35,080          | 3,354         | 9.6%         | 23.2               | --   | --          | --      |
| Gastrointestinal        |                 |               |              |                    |      |             |         |
| Apixaban                | 20,561          | 440           | 2.1%         | 5.5                | 0.90 | 0.80 - 1.01 | 0.086   |
| Warfarin                | 35,080          | 920           | 2.6%         | 6.4                | --   | --          | --      |
| Other                   |                 |               |              |                    |      |             |         |
| Apixaban                | 20,561          | 1,014         | 4.9%         | 12.6               | 0.73 | 0.68 - 0.79 | <0.001  |
| Warfarin                | 35,080          | 2,452         | 7.0%         | 17.0               | --   | --          | --      |
| <b>Humana</b>           |                 |               |              |                    |      |             |         |
| Major Bleeding Event    |                 |               |              |                    |      |             |         |
| All                     |                 |               |              |                    |      |             |         |
| Apixaban                | 3,719           | 106           | 2.9%         | 8.1                | 0.74 | 0.59 - 0.93 | 0.010   |
| Warfarin                | 5,949           | 273           | 4.6%         | 11.6               | --   | --          | --      |
| Gastrointestinal        |                 |               |              |                    |      |             |         |
| Apixaban                | 3,719           | 46            | 1.2%         | 3.5                | 0.76 | 0.54 - 1.08 | 0.124   |
| Warfarin                | 5,949           | 111           | 1.9%         | 4.7                | --   | --          | --      |
| Intracranial            |                 |               |              |                    |      |             |         |
| Apixaban                | 3,719           | 7             | 0.2%         | 0.5                | 0.61 | 0.26 - 1.44 | 0.262   |
| Warfarin                | 5,949           | 21            | 0.4%         | 0.9                | --   | --          | --      |
| Other                   |                 |               |              |                    |      |             |         |
| Apixaban                | 3,719           | 53            | 1.4%         | 4.0                | 0.70 | 0.51 - 0.96 | 0.029   |
| Warfarin                | 5,949           | 141           | 2.4%         | 6.0                | --   | --          | --      |
| CRNM Bleeding Event     |                 |               |              |                    |      |             |         |
| All                     |                 |               |              |                    |      |             |         |
| Apixaban                | 3,719           | 261           | 7.0%         | 19.9               | 0.80 | 0.69 - 0.92 | 0.002   |
| Warfarin                | 5,949           | 562           | 9.4%         | 23.8               | --   | --          | --      |
| Gastrointestinal        |                 |               |              |                    |      |             |         |
| Apixaban                | 3,719           | 87            | 2.3%         | 6.6                | 0.86 | 0.67 - 1.11 | 0.253   |
| Warfarin                | 5,949           | 178           | 3.0%         | 7.5                | --   | --          | --      |
| Other                   |                 |               |              |                    |      |             |         |
| Apixaban                | 3,719           | 174           | 4.7%         | 13.2               | 0.79 | 0.66 - 0.95 | 0.010   |
| Warfarin                | 5,949           | 389           | 6.5%         | 16.5               | --   | --          | --      |

**Online Supplement -- Table 4b.** Risks and hazard ratios for bleeding events among patients receiving apixaban and warfarin as outpatient therapy for VTE -- unmatched-samples analysis with multivariable Cox proportional hazards models

|                      | No.<br>Patients | No.<br>Events | %<br>Evented | Risk per<br>100 PY | HR   | 95% CI      | p-value |
|----------------------|-----------------|---------------|--------------|--------------------|------|-------------|---------|
| <b>MarketScan</b>    |                 |               |              |                    |      |             |         |
| Major Bleeding Event |                 |               |              |                    |      |             |         |
| All                  |                 |               |              |                    |      |             |         |
| Apixaban             | 5,748           | 55            | 1.0%         | 2.8                | 0.76 | 0.55 - 1.07 | 0.114   |
| Warfarin             | 9,069           | 137           | 1.5%         | 4.1                | --   | --          | --      |
| Gastrointestinal     |                 |               |              |                    |      |             |         |
| Apixaban             | 5,748           | 22            | 0.4%         | 1.1                | 0.88 | 0.52 - 1.50 | 0.641   |
| Warfarin             | 9,069           | 39            | 0.4%         | 1.2                | --   | --          | --      |
| Intracranial         |                 |               |              |                    |      |             |         |
| Apixaban             | 5,748           | 5             | 0.1%         | 0.3                | 0.52 | 0.19 - 1.43 | 0.205   |
| Warfarin             | 9,069           | 15            | 0.2%         | 0.4                | --   | --          | --      |
| Other                |                 |               |              |                    |      |             |         |
| Apixaban             | 5,748           | 28            | 0.5%         | 1.4                | 0.72 | 0.46 - 1.14 | 0.161   |
| Warfarin             | 9,069           | 83            | 0.9%         | 2.5                | --   | --          | --      |
| CRNM Bleeding Event  |                 |               |              |                    |      |             |         |
| All                  |                 |               |              |                    |      |             |         |
| Apixaban             | 5,748           | 412           | 7.2%         | 20.8               | 0.77 | 0.69 - 0.87 | <0.001  |
| Warfarin             | 9,069           | 911           | 10.0%        | 27.1               | --   | --          | --      |
| Gastrointestinal     |                 |               |              |                    |      |             |         |
| Apixaban             | 5,748           | 120           | 2.1%         | 6.1                | 0.85 | 0.68 - 1.07 | 0.174   |
| Warfarin             | 9,069           | 263           | 2.9%         | 7.8                | --   | --          | --      |
| Other                |                 |               |              |                    |      |             |         |
| Apixaban             | 5,748           | 292           | 5.1%         | 14.8               | 0.78 | 0.68 - 0.90 | <0.001  |
| Warfarin             | 9,069           | 653           | 7.2%         | 19.4               | --   | --          | --      |
| <b>Optum</b>         |                 |               |              |                    |      |             |         |
| Major Bleeding Event |                 |               |              |                    |      |             |         |
| All                  |                 |               |              |                    |      |             |         |
| Apixaban             | 4,419           | 93            | 2.1%         | 6.0                | 0.74 | 0.59 - 0.94 | 0.013   |
| Warfarin             | 9,956           | 350           | 3.5%         | 8.9                | --   | --          | --      |
| Gastrointestinal     |                 |               |              |                    |      |             |         |
| Apixaban             | 4,419           | 35            | 0.8%         | 2.3                | 0.76 | 0.52 - 1.11 | 0.152   |
| Warfarin             | 9,956           | 132           | 1.3%         | 3.4                | --   | --          | --      |
| Intracranial         |                 |               |              |                    |      |             |         |
| Apixaban             | 4,419           | 7             | 0.2%         | 0.5                | 0.60 | 0.27 - 1.37 | 0.229   |
| Warfarin             | 9,956           | 32            | 0.3%         | 0.8                | --   | --          | --      |
| Other                |                 |               |              |                    |      |             |         |
| Apixaban             | 4,419           | 51            | 1.2%         | 3.3                | 0.76 | 0.55 - 1.03 | 0.079   |
| Warfarin             | 9,956           | 187           | 1.9%         | 4.7                | --   | --          | --      |
| CRNM Bleeding Event  |                 |               |              |                    |      |             |         |
| All                  |                 |               |              |                    |      |             |         |
| Apixaban             | 4,419           | 284           | 6.4%         | 18.4               | 0.81 | 0.70 - 0.92 | 0.002   |
| Warfarin             | 9,956           | 839           | 8.4%         | 21.3               | --   | --          | --      |
| Gastrointestinal     |                 |               |              |                    |      |             |         |
| Apixaban             | 4,419           | 98            | 2.2%         | 6.4                | 1.11 | 0.88 - 1.41 | 0.386   |
| Warfarin             | 9,956           | 229           | 2.3%         | 5.8                | --   | --          | --      |
| Other                |                 |               |              |                    |      |             |         |
| Apixaban             | 4,419           | 187           | 4.2%         | 12.1               | 0.71 | 0.60 - 0.84 | <0.001  |
| Warfarin             | 9,956           | 613           | 6.2%         | 15.6               | --   | --          | --      |

**Online Supplement -- Table 4b.** Risks and hazard ratios for bleeding events among patients receiving apixaban and warfarin as outpatient therapy for VTE -- unmatched-samples analysis with multivariable Cox proportional hazards models

|                      | No.<br>Patients | No.<br>Events | %<br>Evented | Risk per<br>100 PY | HR   | 95% CI      | p-value |
|----------------------|-----------------|---------------|--------------|--------------------|------|-------------|---------|
| <b>PharMetrics</b>   |                 |               |              |                    |      |             |         |
| Major Bleeding Event |                 |               |              |                    |      |             |         |
| All                  |                 |               |              |                    |      |             |         |
| Apixaban             | 6,675           | 66            | 1.0%         | 2.1                | 0.64 | 0.48 - 0.85 | 0.002   |
| Warfarin             | 10,106          | 193           | 1.9%         | 4.0                | --   | --          | --      |
| Gastrointestinal     |                 |               |              |                    |      |             |         |
| Apixaban             | 6,675           | 15            | 0.2%         | 0.5                | 0.54 | 0.30 - 0.97 | 0.038   |
| Warfarin             | 10,106          | 55            | 0.5%         | 1.1                | --   | --          | --      |
| Intracranial         |                 |               |              |                    |      |             |         |
| Apixaban             | 6,675           | 9             | 0.1%         | 0.3                | 1.06 | 0.46 - 2.41 | 0.897   |
| Warfarin             | 10,106          | 17            | 0.2%         | 0.4                | --   | --          | --      |
| Other                |                 |               |              |                    |      |             |         |
| Apixaban             | 6,675           | 42            | 0.6%         | 1.3                | 0.63 | 0.44 - 0.91 | 0.013   |
| Warfarin             | 10,106          | 121           | 1.2%         | 2.5                | --   | --          | --      |
| CRNM Bleeding Event  |                 |               |              |                    |      |             |         |
| All                  |                 |               |              |                    |      |             |         |
| Apixaban             | 6,675           | 495           | 7.4%         | 15.5               | 0.73 | 0.65 - 0.81 | <0.001  |
| Warfarin             | 10,106          | 1,042         | 10.3%        | 21.7               | --   | --          | --      |
| Gastrointestinal     |                 |               |              |                    |      |             |         |
| Apixaban             | 6,675           | 135           | 2.0%         | 4.2                | 0.88 | 0.71 - 1.09 | 0.226   |
| Warfarin             | 10,106          | 250           | 2.5%         | 5.2                | --   | --          | --      |
| Other                |                 |               |              |                    |      |             |         |
| Apixaban             | 6,675           | 361           | 5.4%         | 11.3               | 0.69 | 0.61 - 0.79 | <0.001  |
| Warfarin             | 10,106          | 797           | 7.9%         | 16.6               | --   | --          | --      |

CRNM: clinically relevant non-major; VTE: venous thromboembolism

**Online Supplement -- Table 4c.** Risks and hazard ratios for bleeding events among patients receiving apixaban and warfarin as outpatient therapy for VTE -- unmatched-samples analysis with IPTW-ATE

|                         | No.<br>Patients | No.<br>Events | %<br>Evented | Risk per<br>100 PY | HR   | 95% CI      | p-value |
|-------------------------|-----------------|---------------|--------------|--------------------|------|-------------|---------|
| <b>Total Population</b> |                 |               |              |                    |      |             |         |
| Major Bleeding Event    |                 |               |              |                    |      |             |         |
| All                     |                 |               |              |                    |      |             |         |
| Apixaban                | 20,561          | 320           | 1.6%         | 4.0                | 0.71 | 0.63 - 0.80 | <0.001  |
| Warfarin                | 35,080          | 953           | 2.7%         | 6.6                | --   | --          | --      |
| Gastrointestinal        |                 |               |              |                    |      |             |         |
| Apixaban                | 20,561          | 118           | 0.6%         | 1.5                | 0.75 | 0.61 - 0.91 | 0.004   |
| Warfarin                | 35,080          | 337           | 1.0%         | 2.3                | --   | --          | --      |
| Intracranial            |                 |               |              |                    |      |             |         |
| Apixaban                | 20,561          | 28            | 0.1%         | 0.3                | 0.73 | 0.48 - 1.09 | 0.121   |
| Warfarin                | 35,080          | 85            | 0.2%         | 0.6                | --   | --          | --      |
| Other                   |                 |               |              |                    |      |             |         |
| Apixaban                | 20,561          | 174           | 0.8%         | 2.2                | 0.68 | 0.58 - 0.81 | <0.001  |
| Warfarin                | 35,080          | 532           | 1.5%         | 3.7                | --   | --          | --      |
| CRNM Bleeding Event     |                 |               |              |                    |      |             |         |
| All                     |                 |               |              |                    |      |             |         |
| Apixaban                | 20,561          | 1,452         | 7.1%         | 18.1               | 0.76 | 0.71 - 0.81 | <0.001  |
| Warfarin                | 35,080          | 3,354         | 9.6%         | 23.2               | --   | --          | --      |
| Gastrointestinal        |                 |               |              |                    |      |             |         |
| Apixaban                | 20,561          | 440           | 2.1%         | 5.5                | 0.90 | 0.80 - 1.00 | 0.058   |
| Warfarin                | 35,080          | 920           | 2.6%         | 6.4                | --   | --          | --      |
| Other                   |                 |               |              |                    |      |             |         |
| Apixaban                | 20,561          | 1,014         | 4.9%         | 12.6               | 0.71 | 0.66 - 0.76 | <0.001  |
| Warfarin                | 35,080          | 2,452         | 7.0%         | 17.0               | --   | --          | --      |
| <b>Humana</b>           |                 |               |              |                    |      |             |         |
| Major Bleeding Event    |                 |               |              |                    |      |             |         |
| All                     |                 |               |              |                    |      |             |         |
| Apixaban                | 3,719           | 106           | 2.9%         | 8.1                | 0.77 | 0.62 - 0.96 | 0.021   |
| Warfarin                | 5,949           | 273           | 4.6%         | 11.6               | --   | --          | --      |
| Gastrointestinal        |                 |               |              |                    |      |             |         |
| Apixaban                | 3,719           | 46            | 1.2%         | 3.5                | 0.84 | 0.60 - 1.16 | 0.292   |
| Warfarin                | 5,949           | 111           | 1.9%         | 4.7                | --   | --          | --      |
| Intracranial            |                 |               |              |                    |      |             |         |
| Apixaban                | 3,719           | 7             | 0.2%         | 0.5                | 0.76 | 0.33 - 1.71 | 0.500   |
| Warfarin                | 5,949           | 21            | 0.4%         | 0.9                | --   | --          | --      |
| Other                   |                 |               |              |                    |      |             |         |
| Apixaban                | 3,719           | 53            | 1.4%         | 4.0                | 0.73 | 0.53 - 1.00 | 0.047   |
| Warfarin                | 5,949           | 141           | 2.4%         | 6.0                | --   | --          | --      |
| CRNM Bleeding Event     |                 |               |              |                    |      |             |         |
| All                     |                 |               |              |                    |      |             |         |
| Apixaban                | 3,719           | 261           | 7.0%         | 19.9               | 0.80 | 0.69 - 0.92 | 0.003   |
| Warfarin                | 5,949           | 562           | 9.4%         | 23.8               | --   | --          | --      |
| Gastrointestinal        |                 |               |              |                    |      |             |         |
| Apixaban                | 3,719           | 87            | 2.3%         | 6.6                | 0.80 | 0.62 - 1.04 | 0.092   |
| Warfarin                | 5,949           | 178           | 3.0%         | 7.5                | --   | --          | --      |
| Other                   |                 |               |              |                    |      |             |         |
| Apixaban                | 3,719           | 174           | 4.7%         | 13.2               | 0.79 | 0.66 - 0.95 | 0.011   |
| Warfarin                | 5,949           | 389           | 6.5%         | 16.5               | --   | --          | --      |

**Online Supplement -- Table 4c.** Risks and hazard ratios for bleeding events among patients receiving apixaban and warfarin as outpatient therapy for VTE -- unmatched-samples analysis with IPTW-ATE

|                      | No.<br>Patients | No.<br>Events | %<br>Evented | Risk per<br>100 PY | HR   | 95% CI      | p-value |
|----------------------|-----------------|---------------|--------------|--------------------|------|-------------|---------|
| <b>MarketScan</b>    |                 |               |              |                    |      |             |         |
| Major Bleeding Event |                 |               |              |                    |      |             |         |
| All                  |                 |               |              |                    |      |             |         |
| Apixaban             | 5,748           | 55            | 1.0%         | 2.8                | 0.78 | 0.58 - 1.06 | 0.111   |
| Warfarin             | 9,069           | 137           | 1.5%         | 4.1                | --   | --          | --      |
| Gastrointestinal     |                 |               |              |                    |      |             |         |
| Apixaban             | 5,748           | 22            | 0.4%         | 1.1                | 0.97 | 0.59 - 1.60 | 0.896   |
| Warfarin             | 9,069           | 39            | 0.4%         | 1.2                | --   | --          | --      |
| Intracranial         |                 |               |              |                    |      |             |         |
| Apixaban             | 5,748           | 5             | 0.1%         | 0.3                | 0.61 | 0.23 - 1.62 | 0.321   |
| Warfarin             | 9,069           | 15            | 0.2%         | 0.4                | --   | --          | --      |
| Other                |                 |               |              |                    |      |             |         |
| Apixaban             | 5,748           | 28            | 0.5%         | 1.4                | 0.71 | 0.47 - 1.08 | 0.112   |
| Warfarin             | 9,069           | 83            | 0.9%         | 2.5                | --   | --          | --      |
| CRNM Bleeding Event  |                 |               |              |                    |      |             |         |
| All                  |                 |               |              |                    |      |             |         |
| Apixaban             | 5,748           | 412           | 7.2%         | 20.8               | 0.77 | 0.69 - 0.87 | <0.001  |
| Warfarin             | 9,069           | 911           | 10.0%        | 27.1               | --   | --          | --      |
| Gastrointestinal     |                 |               |              |                    |      |             |         |
| Apixaban             | 5,748           | 120           | 2.1%         | 6.1                | 0.84 | 0.68 - 1.04 | 0.114   |
| Warfarin             | 9,069           | 263           | 2.9%         | 7.8                | --   | --          | --      |
| Other                |                 |               |              |                    |      |             |         |
| Apixaban             | 5,748           | 292           | 5.1%         | 14.8               | 0.75 | 0.65 - 0.86 | <0.001  |
| Warfarin             | 9,069           | 653           | 7.2%         | 19.4               | --   | --          | --      |
| <b>Optum</b>         |                 |               |              |                    |      |             |         |
| Major Bleeding Event |                 |               |              |                    |      |             |         |
| All                  |                 |               |              |                    |      |             |         |
| Apixaban             | 4,419           | 93            | 2.1%         | 6.0                | 0.73 | 0.58 - 0.91 | 0.005   |
| Warfarin             | 9,956           | 350           | 3.5%         | 8.9                | --   | --          | --      |
| Gastrointestinal     |                 |               |              |                    |      |             |         |
| Apixaban             | 4,419           | 35            | 0.8%         | 2.3                | 0.70 | 0.49 - 1.01 | 0.058   |
| Warfarin             | 9,956           | 132           | 1.3%         | 3.4                | --   | --          | --      |
| Intracranial         |                 |               |              |                    |      |             |         |
| Apixaban             | 4,419           | 7             | 0.2%         | 0.5                | 0.59 | 0.26 - 1.32 | 0.198   |
| Warfarin             | 9,956           | 32            | 0.3%         | 0.8                | --   | --          | --      |
| Other                |                 |               |              |                    |      |             |         |
| Apixaban             | 4,419           | 51            | 1.2%         | 3.3                | 0.77 | 0.57 - 1.03 | 0.078   |
| Warfarin             | 9,956           | 187           | 1.9%         | 4.7                | --   | --          | --      |
| CRNM Bleeding Event  |                 |               |              |                    |      |             |         |
| All                  |                 |               |              |                    |      |             |         |
| Apixaban             | 4,419           | 284           | 6.4%         | 18.4               | 0.83 | 0.72 - 0.94 | 0.005   |
| Warfarin             | 9,956           | 839           | 8.4%         | 21.3               | --   | --          | --      |
| Gastrointestinal     |                 |               |              |                    |      |             |         |
| Apixaban             | 4,419           | 98            | 2.2%         | 6.4                | 1.14 | 0.90 - 1.43 | 0.278   |
| Warfarin             | 9,956           | 229           | 2.3%         | 5.8                | --   | --          | --      |
| Other                |                 |               |              |                    |      |             |         |
| Apixaban             | 4,419           | 187           | 4.2%         | 12.1               | 0.72 | 0.61 - 0.84 | <0.001  |
| Warfarin             | 9,956           | 613           | 6.2%         | 15.6               | --   | --          | --      |

**Online Supplement -- Table 4c.** Risks and hazard ratios for bleeding events among patients receiving apixaban and warfarin as outpatient therapy for VTE -- unmatched-samples analysis with IPTW-ATE

|                      | No.<br>Patients | No.<br>Events | %<br>Evented | Risk per<br>100 PY | HR   | 95% CI      | p-value |
|----------------------|-----------------|---------------|--------------|--------------------|------|-------------|---------|
| <b>PharMetrics</b>   |                 |               |              |                    |      |             |         |
| Major Bleeding Event |                 |               |              |                    |      |             |         |
| All                  |                 |               |              |                    |      |             |         |
| Apixaban             | 6,675           | 66            | 1.0%         | 2.1                | 0.65 | 0.50 - 0.84 | 0.001   |
| Warfarin             | 10,106          | 193           | 1.9%         | 4.0                | --   | --          | --      |
| Gastrointestinal     |                 |               |              |                    |      |             |         |
| Apixaban             | 6,675           | 15            | 0.2%         | 0.5                | 0.58 | 0.34 - 0.98 | 0.043   |
| Warfarin             | 10,106          | 55            | 0.5%         | 1.1                | --   | --          | --      |
| Intracranial         |                 |               |              |                    |      |             |         |
| Apixaban             | 6,675           | 9             | 0.1%         | 0.3                | 1.08 | 0.51 - 2.29 | 0.847   |
| Warfarin             | 10,106          | 17            | 0.2%         | 0.4                | --   | --          | --      |
| Other                |                 |               |              |                    |      |             |         |
| Apixaban             | 6,675           | 42            | 0.6%         | 1.3                | 0.62 | 0.44 - 0.86 | 0.005   |
| Warfarin             | 10,106          | 121           | 1.2%         | 2.5                | --   | --          | --      |
| CRNM Bleeding Event  |                 |               |              |                    |      |             |         |
| All                  |                 |               |              |                    |      |             |         |
| Apixaban             | 6,675           | 495           | 7.4%         | 15.5               | 0.69 | 0.62 - 0.77 | <0.001  |
| Warfarin             | 10,106          | 1,042         | 10.3%        | 21.7               | --   | --          | --      |
| Gastrointestinal     |                 |               |              |                    |      |             |         |
| Apixaban             | 6,675           | 135           | 2.0%         | 4.2                | 0.86 | 0.70 - 1.06 | 0.171   |
| Warfarin             | 10,106          | 250           | 2.5%         | 5.2                | --   | --          | --      |
| Other                |                 |               |              |                    |      |             |         |
| Apixaban             | 6,675           | 361           | 5.4%         | 11.3               | 0.64 | 0.57 - 0.73 | <0.001  |
| Warfarin             | 10,106          | 797           | 7.9%         | 16.6               | --   | --          | --      |

CRNM: clinically relevant non-major; IPTW-ATE: inverse probability of treatment weighting-average treatment effect; VTE: venous thromboembolism

**Online Supplement -- Table 5a.** Risks and hazard ratios for recurrent VTE among patients receiving apixaban and warfarin as outpatient therapy for VTE -- matched-samples analysis

|                         | No.<br>Patients | No.<br>Events | %<br>Evented | Risk per<br>100 PY | HR   | 95% CI      | p-value |
|-------------------------|-----------------|---------------|--------------|--------------------|------|-------------|---------|
| <b>Total Population</b> |                 |               |              |                    |      |             |         |
| Apixaban                | 17,878          | 403           | 2.3%         | 5.8                | 0.80 | 0.70 - 0.91 | <0.001  |
| Warfarin                | 17,878          | 521           | 2.9%         | 7.0                | --   | --          | --      |
| <b>Humana</b>           |                 |               |              |                    |      |             |         |
| Apixaban                | 3,318           | 86            | 2.6%         | 7.3                | 0.72 | 0.55 - 0.94 | 0.017   |
| Warfarin                | 3,318           | 127           | 3.8%         | 9.6                | --   | --          | --      |
| <b>MarketScan</b>       |                 |               |              |                    |      |             |         |
| Apixaban                | 4,356           | 74            | 1.7%         | 5.0                | 0.90 | 0.66 - 1.23 | 0.506   |
| Warfarin                | 4,356           | 87            | 2.0%         | 5.4                | --   | --          | --      |
| <b>Optum</b>            |                 |               |              |                    |      |             |         |
| Apixaban                | 4,243           | 92            | 2.2%         | 6.2                | 0.81 | 0.62 - 1.06 | 0.129   |
| Warfarin                | 4,243           | 122           | 2.9%         | 7.3                | --   | --          | --      |
| <b>PharMetrics</b>      |                 |               |              |                    |      |             |         |
| Apixaban                | 5,961           | 151           | 2.5%         | 5.3                | 0.81 | 0.65 - 1.00 | 0.051   |
| Warfarin                | 5,961           | 185           | 3.1%         | 6.5                | --   | --          | --      |

VTE: venous thromboembolism

**Online Supplement -- Table 5b.** Risks and hazard ratios for recurrent VTE among patients receiving apixaban and warfarin as outpatient therapy for VTE -- unmatched-samples analysis with multivariable Cox proportional hazards models

|                         | No. Patients | No. Events | % Evented | Risk per 100 PY | HR   | 95% CI      | p-value |
|-------------------------|--------------|------------|-----------|-----------------|------|-------------|---------|
| <b>Total Population</b> |              |            |           |                 |      |             |         |
| Apixaban                | 20,561       | 440        | 2.1%      | 5.5             | 0.72 | 0.65 - 0.81 | <0.001  |
| Warfarin                | 35,080       | 1,218      | 3.5%      | 8.4             | --   | --          | --      |
| <b>Humana</b>           |              |            |           |                 |      |             |         |
| Apixaban                | 3,719        | 92         | 2.5%      | 7.0             | 0.68 | 0.54 - 0.87 | 0.002   |
| Warfarin                | 5,949        | 247        | 4.2%      | 10.5            | --   | --          | --      |
| <b>MarketScan</b>       |              |            |           |                 |      |             |         |
| Apixaban                | 5,748        | 92         | 1.6%      | 4.7             | 0.90 | 0.69 - 1.16 | 0.408   |
| Warfarin                | 9,069        | 203        | 2.2%      | 6.0             | --   | --          | --      |
| <b>Optum</b>            |              |            |           |                 |      |             |         |
| Apixaban                | 4,419        | 95         | 2.1%      | 6.2             | 0.69 | 0.55 - 0.87 | 0.002   |
| Warfarin                | 9,956        | 385        | 3.9%      | 9.8             | --   | --          | --      |
| <b>PharMetrics</b>      |              |            |           |                 |      |             |         |
| Apixaban                | 6,675        | 161        | 2.4%      | 5.0             | 0.70 | 0.58 - 0.85 | <0.001  |
| Warfarin                | 10,106       | 383        | 3.8%      | 8.0             | --   | --          | --      |

VTE: venous thromboembolism

**Online Supplement -- Table 5c.** Risks and hazard ratios for recurrent VTE among patients receiving apixaban and warfarin as outpatient therapy for VTE -- unmatched-samples analysis with IPTW-ATE

|                         | No. Patients | No. Events | % Evented | Risk per 100 PY | HR   | 95% CI      | p-value |
|-------------------------|--------------|------------|-----------|-----------------|------|-------------|---------|
| <b>Total Population</b> |              |            |           |                 |      |             |         |
| Apixaban                | 20,561       | 440        | 2.1%      | 5.5             | 0.73 | 0.66 - 0.81 | <0.001  |
| Warfarin                | 35,080       | 1,218      | 3.5%      | 8.4             | --   | --          | --      |
| <b>Humana</b>           |              |            |           |                 |      |             |         |
| Apixaban                | 3,719        | 92         | 2.5%      | 7.0             | 0.72 | 0.57 - 0.91 | 0.005   |
| Warfarin                | 5,949        | 247        | 4.2%      | 10.5            | --   | --          | --      |
| <b>MarketScan</b>       |              |            |           |                 |      |             |         |
| Apixaban                | 5,748        | 92         | 1.6%      | 4.7             | 0.88 | 0.69 - 1.12 | 0.298   |
| Warfarin                | 9,069        | 203        | 2.2%      | 6.0             | --   | --          | --      |
| <b>Optum</b>            |              |            |           |                 |      |             |         |
| Apixaban                | 4,419        | 95         | 2.1%      | 6.2             | 0.74 | 0.60 - 0.91 | 0.004   |
| Warfarin                | 9,956        | 385        | 3.9%      | 9.8             | --   | --          | --      |
| <b>PharMetrics</b>      |              |            |           |                 |      |             |         |
| Apixaban                | 6,675        | 161        | 2.4%      | 5.0             | 0.69 | 0.57 - 0.82 | <0.001  |
| Warfarin                | 10,106       | 383        | 3.8%      | 8.0             | --   | --          | --      |

IPTW-ATE: inverse probability of treatment weighting-average treatment effect; VTE: venous thromboembolism
